# Supplementary material for: Common coupling map advances GPCR-G protein selectivity
Source: bioRxiv preprint, doi:10.1101/2021.09.07.459250, version 2 (2022-02-22)
Supplement: Spreadsheet S5 [file 459250_file06.xlsx]

## Sheet: Info
Sheet S3
Tabs
RecNamesAll	Receptor names from UniProt (reference for all data lookups), Bouvier et al. and Inoue et al.
B-EmEC	Bouvier et al. Emax and pEC50 values
I-EmEC	Inoue et al. Emax and pEC50 values
B-LogEmaxOverpEC50	Bouvier et al. Log(Emax/pEC50) values
I-LogEmaxOverpEC50	Inoue et al. Log(Emax/pEC50) values
GtP	Guide to Pharmacology values
Merged_couplings	Results: Merged couplings (B, I and GtP datasets).
Fig_3	Data used to generate Figure 3.
Fig_4	Data used to generate Figure 4.
Fig_5	Data used to generate Figure 5.
Fig_Determinants	Data used to generate Figure Determinants (accompanying manuscript for the G protein ressource in GPCRdb)
Abbreviations
B	Bouvier et al.
I	Inoue et al.
BI	minimum-maximum normalisation
IUPHAR	International Union of Pharmacology

## Sheet: RecNamesAll
UniProt	Accession	IUPHAR	GtP ID	Cl	Ligand type	Receptor family	HGNC	Bouvier	Inoue
BRS3	P32247	BB3	40	A	Peptide	Bombesin	bombesin receptor subtype 3
NPY6R	Q99463	Y6	683	A	Peptide	NeuropeptideY	neuropeptide Y receptor Y6 (pseudogene)
PAR2	P55085	PAR2	348	A	Peptide	Proteinase-activated	F2R like trypsin receptor 1	PAR-2	F2RL1
ACKR1	Q16570	ACKR1	316	A	Protein	Chemokine	atypical chemokine receptor 1 (Duffy blood group)
ACKR2	O00590	ACKR2	314	A	Protein	Chemokine	atypical chemokine receptor 2
GPR42	O15529	GPR42	228	A	Lipid	Freefattyacid	G protein-coupled receptor 42
GPR42	O15529	GPR42	228	A	Lipid	Freefattyacid	G protein-coupled receptor 42
OPSD	P08100	Rhodopsin	2963	A	Sensory	Opsins	rhodopsin
OPN4	Q9UHM6	OPN4	2758	A	Sensory	Opsins	opsin 4
OPN3	Q9H1Y3	OPN3	160	A	Sensory	Opsins	opsin 3
OPN5	Q6U736	OPN5	161	A	Sensory	Opsins	opsin 5
OPSB	P03999	OPN1SW	2960	A	Sensory	Opsins	opsin 1, short wave sensitive
OPSG	P04001	OPN1MW	2962	A	Sensory	Opsins	opsin 1, medium wave sensitive
OPSR	P04000	OPN1LW	2961	A	Sensory	Opsins	opsin 1, long wave sensitive
GPR4	P46093	GPR4	84	A	Orphan	ClassAorphans	G protein-coupled receptor 4	GPR4
GPR15	P49685	GPR15	87	A	Orphan	ClassAorphans	G protein-coupled receptor 15
GPR19	Q15760	GPR19	90	A	Orphan	ClassAorphans	G protein-coupled receptor 19
GPR20	Q99678	GPR20	91	A	Orphan	ClassAorphans	G protein-coupled receptor 20
GPR21	Q99679	GPR21	92	A	Orphan	ClassAorphans	G protein-coupled receptor 21
GPR22	Q99680	GPR22	93	A	Orphan	ClassAorphans	G protein-coupled receptor 22
GPR25	O00155	GPR25	95	A	Orphan	ClassAorphans	G protein-coupled receptor 25
GPR26	Q8NDV2	GPR26	96	A	Orphan	ClassAorphans	G protein-coupled receptor 26
GPR27	Q9NS67	GPR27	97	A	Orphan	ClassAorphans	G protein-coupled receptor 27
GPR33	Q49SQ1	GPR33	100	A	Orphan	ClassAorphans	G protein-coupled receptor 33
GPR45	Q9Y5Y3	GPR45	106	A	Orphan	ClassAorphans	G protein-coupled receptor 45
MTR1L	Q13585	GPR50	107	A	Orphan	ClassAorphans	G protein-coupled receptor 50
GPR52	Q9Y2T5	GPR52	108	A	Orphan	ClassAorphans	G protein-coupled receptor 52
GPR61	Q9BZJ8	GPR61	110	A	Orphan	ClassAorphans	G protein-coupled receptor 61
GPR62	Q9BZJ7	GPR62	111	A	Orphan	ClassAorphans	G protein-coupled receptor 62
PSYR	Q8IYL9	GPR65	113	A	Orphan	ClassAorphans	G protein-coupled receptor 65	GPR65
OGR1	Q15743	GPR68	114	A	Orphan	ClassAorphans	G protein-coupled receptor 68	GPR68
GPR78	Q96P69	GPR78	116	A	Orphan	ClassAorphans	G protein-coupled receptor 78
GPR82	Q96P67	GPR82	118	A	Orphan	ClassAorphans	G protein-coupled receptor 82
GPR83	Q9NYM4	GPR83	119	A	Orphan	ClassAorphans	G protein-coupled receptor 83
GPR84	Q9NQS5	GPR84	120	A	Orphan	ClassAorphans	G protein-coupled receptor 84	GPR84	GPR84
GPR85	P60893	GPR85	121	A	Orphan	ClassAorphans	G protein-coupled receptor 85
GPR88	Q9GZN0	GPR88	123	A	Orphan	ClassAorphans	G protein-coupled receptor 88
GP101	Q96P66	GPR101	125	A	Orphan	ClassAorphans	G protein-coupled receptor 101
GP135	Q8IZ08	GPR135	129	A	Orphan	ClassAorphans	G protein-coupled receptor 135
GP141	Q7Z602	GPR141	131	A	Orphan	ClassAorphans	G protein-coupled receptor 141
GP142	Q7Z601	GPR142	132	A	Orphan	ClassAorphans	G protein-coupled receptor 142
GP146	Q96CH1	GPR146	133	A	Orphan	ClassAorphans	G protein-coupled receptor 146
GP148	Q8TDV2	GPR148	134	A	Orphan	ClassAorphans	G protein-coupled receptor 148
GP149	Q86SP6	GPR149	135	A	Orphan	ClassAorphans	G protein-coupled receptor 149
GP150	Q8NGU9	GPR150	136	A	Orphan	ClassAorphans	G protein-coupled receptor 150
GP151	Q8TDV0	GPR151	137	A	Orphan	ClassAorphans	G protein-coupled receptor 151
GP152	Q8TDT2	GPR152	138	A	Orphan	ClassAorphans	G protein-coupled receptor 152
GP153	Q6NV75	GPR153	139	A	Orphan	ClassAorphans	G protein-coupled receptor 153
GP160	Q9UJ42	GPR160	140	A	Orphan	ClassAorphans	G protein-coupled receptor 160
GP161	Q8N6U8	GPR161	141	A	Orphan	ClassAorphans	G protein-coupled receptor 161
GP162	Q16538	GPR162	142	A	Orphan	ClassAorphans	G protein-coupled receptor 162
GP171	O14626	GPR171	143	A	Orphan	ClassAorphans	G protein-coupled receptor 171
GP173	Q9NS66	GPR173	144	A	Orphan	ClassAorphans	G protein-coupled receptor 173
GP176	Q14439	GPR176	637	A	Orphan	ClassAorphans	G protein-coupled receptor 176
GP182	O15218	GPR182	146	A	Orphan	ClassAorphans	G protein-coupled receptor 182
MAS	P04201	MAS1	150	A	Orphan	ClassAorphans	MAS1 proto-oncogene, G protein-coupled receptor
MAS1L	P35410	MAS1L	151	A	Orphan	ClassAorphans	MAS1 proto-oncogene like, G protein-coupled receptor
MRGRE	Q86SM8	MRGPRE	153	A	Orphan	ClassAorphans	MAS related GPR family member E
MRGRF	Q96AM1	MRGPRF	154	A	Orphan	ClassAorphans	MAS related GPR family member F
MRGRG	Q86SM5	MRGPRG	155	A	Orphan	ClassAorphans	MAS related GPR family member G
MRGX3	Q96LB0	MRGPRX3	158	A	Orphan	ClassAorphans	MAS related GPR family member X3
MRGX4	Q96LA9	MRGPRX4	159	A	Orphan	ClassAorphans	MAS related GPR family member X4
P2RY8	Q86VZ1	P2RY8	164	A	Orphan	ClassAorphans	P2Y receptor family member 8
TAAR2	Q9P1P5	TAAR2	167	A	Orphan	ClassAorphans	trace amine associated receptor 2
TAAR5	O14804	TAAR5	170	A	Orphan	ClassAorphans	trace amine associated receptor 5
TAAR6	Q96RI8	TAAR6	171	A	Orphan	ClassAorphans	trace amine associated receptor 6
TAAR8	Q969N4	TAAR8	172	A	Orphan	ClassAorphans	trace amine associated receptor 8
TAAR9	Q96RI9	TAAR9	173	A	Orphan	ClassAorphans	trace amine associated receptor 9
CALRL	Q16602	Calcitonin receptor-like	47	B1	Peptide	Calcitonin	calcitonin receptor like receptor
AGRL2	O95490	ADGRL2	207	B2	Orphan	Adhesionclassorphans	adhesion G protein-coupled receptor L2
AGRL3	Q9HAR2	ADGRL3	208	B2	Orphan	Adhesionclassorphans	adhesion G protein-coupled receptor L3
AGRL4	Q9HBW9	ADGRL4	181	B2	Orphan	Adhesionclassorphans	adhesion G protein-coupled receptor L4
AGRE1	Q14246	ADGRE1	182	B2	Orphan	Adhesionclassorphans	adhesion G protein-coupled receptor E1
AGRE2	Q9UHX3	ADGRE2	183	B2	Orphan	Adhesionclassorphans	adhesion G protein-coupled receptor E2
AGRE3	Q9BY15	ADGRE3	184	B2	Orphan	Adhesionclassorphans	adhesion G protein-coupled receptor E3
AGRE4	Q86SQ3	ADGRE4P	185	B2	Orphan	Adhesionclassorphans	adhesion G protein-coupled receptor E4, pseudogene
AGRE5	P48960	ADGRE5	177	B2	Orphan	Adhesionclassorphans	adhesion G protein-coupled receptor E5	0	0
AGRA1	Q86SQ6	ADGRA1	197	B2	Orphan	Adhesionclassorphans	adhesion G protein-coupled receptor A1
AGRA2	Q96PE1	ADGRA2	198	B2	Orphan	Adhesionclassorphans	adhesion G protein-coupled receptor A2
AGRA3	Q8IWK6	ADGRA3	199	B2	Orphan	Adhesionclassorphans	adhesion G protein-coupled receptor A3
CELR1	Q9NYQ6	CELSR1	178	B2	Orphan	Adhesionclassorphans	cadherin EGF LAG seven-pass G-type receptor 1
CELR2	Q9HCU4	CELSR2	179	B2	Orphan	Adhesionclassorphans	cadherin EGF LAG seven-pass G-type receptor 2
CELR3	Q9NYQ7	CELSR3	180	B2	Orphan	Adhesionclassorphans	cadherin EGF LAG seven-pass G-type receptor 3
AGRD1	Q6QNK2	ADGRD1	202	B2	Orphan	Adhesionclassorphans	adhesion G protein-coupled receptor D1
AGRD2	Q7Z7M1	ADGRD2	204	B2	Orphan	Adhesionclassorphans	adhesion G protein-coupled receptor D2
AGRF1	Q5T601	ADGRF1	190	B2	Orphan	Adhesionclassorphans	adhesion G protein-coupled receptor F1
AGRF2	Q8IZF7	ADGRF2	191	B2	Orphan	Adhesionclassorphans	adhesion G protein-coupled receptor F2
AGRF3	Q8IZF5	ADGRF3	193	B2	Orphan	Adhesionclassorphans	adhesion G protein-coupled receptor F3
AGRF4	Q8IZF3	ADGRF4	195	B2	Orphan	Adhesionclassorphans	adhesion G protein-coupled receptor F4
AGRF5	Q8IZF2	ADGRF5	196	B2	Orphan	Adhesionclassorphans	adhesion G protein-coupled receptor F5
AGRG5	Q8IZF4	ADGRG5	194	B2	Orphan	Adhesionclassorphans	adhesion G protein-coupled receptor G5
AGRB2	O60241	ADGRB2	175	B2	Orphan	Adhesionclassorphans	adhesion G protein-coupled receptor B2
AGRB3	O60242	ADGRB3	176	B2	Orphan	Adhesionclassorphans	adhesion G protein-coupled receptor B3
AGRG1	Q9Y653	ADGRG1	186	B2	Orphan	Adhesionclassorphans	adhesion G protein-coupled receptor G1
AGRG2	Q8IZP9	ADGRG2	187	B2	Orphan	Adhesionclassorphans	adhesion G protein-coupled receptor G2
AGRG3	Q86Y34	ADGRG3	188	B2	Orphan	Adhesionclassorphans	adhesion G protein-coupled receptor G3
AGRG4	Q8IZF6	ADGRG4	192	B2	Orphan	Adhesionclassorphans	adhesion G protein-coupled receptor G4
AGRG6	Q86SQ4	ADGRG6	200	B2	Orphan	Adhesionclassorphans	adhesion G protein-coupled receptor G6
AGRG7	Q96K78	ADGRG7	201	B2	Orphan	Adhesionclassorphans	adhesion G protein-coupled receptor G7
AGRV1	Q8WXG9	ADGRV1	189	B2	Orphan	Adhesionclassorphans	adhesion G protein-coupled receptor V1	0	0
GABR2	O75899	GABAB2	241	C	Aminoacid	GABA<sub>B</sub>	gamma-aminobutyric acid type B receptor subunit 2
TS1R1	Q7RTX1	TAS1R1	656	C	Sensory	Taste1	taste 1 receptor member 1
TS1R2	Q8TE23	TAS1R2	657	C	Sensory	Taste1	taste 1 receptor member 2
TS1R3	Q7RTX0	TAS1R3	658	C	Sensory	Taste1	taste 1 receptor member 3
GP156	Q8NFN8	GPR156	209	C	Orphan	ClassCOrphans	G protein-coupled receptor 156
GP158	Q5T848	GPR158	210	C	Orphan	ClassCOrphans	G protein-coupled receptor 158
GP179	Q6PRD1	GPR179	211	C	Orphan	ClassCOrphans	G protein-coupled receptor 179
RAI3	Q8NFJ5	GPRC5A	258	C	Orphan	ClassCOrphans	G protein-coupled receptor class C group 5 member A
GPC5B	Q9NZH0	GPRC5B	259	C	Orphan	ClassCOrphans	G protein-coupled receptor class C group 5 member B
GPC5C	Q9NQ84	GPRC5C	260	C	Orphan	ClassCOrphans	G protein-coupled receptor class C group 5 member C
GPC5D	Q9NZD1	GPRC5D	261	C	Orphan	ClassCOrphans	G protein-coupled receptor class C group 5 member D
FZD3	Q9NPG1	FZD3	231	F	Protein	Frizzled	frizzled class receptor 3
FZD4	Q9ULV1	FZD4	232	F	Protein	Frizzled	frizzled class receptor 4
FZD5	Q13467	FZD5	233	F	Protein	Frizzled	frizzled class receptor 5
FZD7	O75084	FZD7	235	F	Protein	Frizzled	frizzled class receptor 7
FZD8	Q9H461	FZD8	236	F	Protein	Frizzled	frizzled class receptor 8
FZD9	O00144	FZD9	237	F	Protein	Frizzled	frizzled class receptor 9
FZD10	Q9ULW2	FZD10	238	F	Protein	Frizzled	frizzled class receptor 10
SMO	Q99835	SMO	239	F	Protein	Frizzled	smoothened, frizzled class receptor
TA2R4	Q9NYW5	TAS2R4	661	T	Sensory	Taste2	taste 2 receptor member 4
TA2R5	Q9NYW4	TAS2R5	662	T	Sensory	Taste2	taste 2 receptor member 5
TA2R1	Q9NYW7	TAS2R1	659	T	Sensory	Taste2	taste 2 receptor member 1
TA2R3	Q9NYW6	TAS2R3	660	T	Sensory	Taste2	taste 2 receptor member 3
TA2R7	Q9NYW3	TAS2R7	663	T	Sensory	Taste2	taste 2 receptor member 7
TA2R8	Q9NYW2	TAS2R8	664	T	Sensory	Taste2	taste 2 receptor member 8
TA2R9	Q9NYW1	TAS2R9	665	T	Sensory	Taste2	taste 2 receptor member 9
T2R10	Q9NYW0	TAS2R10	666	T	Sensory	Taste2	taste 2 receptor member 10
T2R13	Q9NYV9	TAS2R13	667	T	Sensory	Taste2	taste 2 receptor member 13
T2R14	Q9NYV8	TAS2R14	668	T	Sensory	Taste2	taste 2 receptor member 14
T2R16	Q9NYV7	TAS2R16	669	T	Sensory	Taste2	taste 2 receptor member 16
T2R19	P59542	TAS2R19	670	T	Sensory	Taste2	taste 2 receptor member 19
T2R20	P59543	TAS2R20	671	T	Sensory	Taste2	taste 2 receptor member 20
T2R30	P59541	TAS2R30	673	T	Sensory	Taste2	taste 2 receptor member 30
T2R31	P59538	TAS2R31	674	T	Sensory	Taste2	taste 2 receptor member 31
T2R38	P59533	TAS2R38	682	T	Sensory	Taste2	taste 2 receptor member 38
T2R39	P59534	TAS2R39	675	T	Sensory	Taste2	taste 2 receptor member 39
T2R40	P59535	TAS2R40	676	T	Sensory	Taste2	taste 2 receptor member 40
T2R41	P59536	TAS2R41	680	T	Sensory	Taste2	taste 2 receptor member 41
T2R42	Q7RTR8	TAS2R42	672	T	Sensory	Taste2	taste 2 receptor member 42
T2R43	P59537	TAS2R43	678	T	Sensory	Taste2	taste 2 receptor member 43
T2R45	P59539	TAS2R45	2828	T	Sensory	Taste2	taste 2 receptor member 45
T2R46	P59540	TAS2R46	679	T	Sensory	Taste2	taste 2 receptor member 46
T2R50	P59544	TAS2R50	677	T	Sensory	Taste2	taste 2 receptor member 50
T2R60	P59551	TAS2R60	681	T	Sensory	Taste2	taste 2 receptor member 60
G137A	Q96N19	GPR137	652	O	Orphan	OtherGPCRorphans	G protein-coupled receptor 137
TPRA1	Q86W33	TPRA1	655	O	Orphan	OtherGPCRorphans	transmembrane protein adipocyte associated 1
GP157	Q5UAW9	GPR157	205	O	Orphan	OtherGPCRorphans	G protein-coupled receptor 157
5HT1A	P08908	5-HT1A	1	A	Aminergic	5-Hydroxytryptamine	5-hydroxytryptamine receptor 1A	5-HT1A	HTR1A
5HT1B	P28222	5-HT1B	2	A	Aminergic	5-Hydroxytryptamine	5-hydroxytryptamine receptor 1B	5-HT1B	HTR1B
5HT1D	P28221	5-HT1D	3	A	Aminergic	5-Hydroxytryptamine	5-hydroxytryptamine receptor 1D	5-HT1D	HTR1D
5HT1E	P28566	5-HT1E	4	A	Aminergic	5-Hydroxytryptamine	5-hydroxytryptamine receptor 1E		HTR1E
5HT1F	P30939	5-HT1F	5	A	Aminergic	5-Hydroxytryptamine	5-hydroxytryptamine receptor 1F		HTR1F
5HT2A	P28223	5-HT2A	6	A	Aminergic	5-Hydroxytryptamine	5-hydroxytryptamine receptor 2A	5-HT2A	HTR2A
5HT2B	P41595	5-HT2B	7	A	Aminergic	5-Hydroxytryptamine	5-hydroxytryptamine receptor 2B	5-HT2B	HTR2B
5HT2C	P28335	5-HT2C	8	A	Aminergic	5-Hydroxytryptamine	5-hydroxytryptamine receptor 2C	5-HT2C	HTR2C
5HT4R	Q13639	5-HT4	9	A	Aminergic	5-Hydroxytryptamine	5-hydroxytryptamine receptor 4		HTR4
5HT5A	P47898	5-HT5A	10	A	Aminergic	5-Hydroxytryptamine	5-hydroxytryptamine receptor 5A
5HT6R	P50406	5-HT6	11	A	Aminergic	5-Hydroxytryptamine	5-hydroxytryptamine receptor 6		HTR6
5HT7R	P34969	5-HT7	12	A	Aminergic	5-Hydroxytryptamine	5-hydroxytryptamine receptor 7		HTR7
AA1R	P30542	A1	18	A	Nucleotide	Adenosine	adenosine A1 receptor	A1	ADORA1
AA2AR	P29274	A2A	19	A	Nucleotide	Adenosine	adenosine A2a receptor	A2A	ADORA2A
AA2BR	P29275	A2B	20	A	Nucleotide	Adenosine	adenosine A2b receptor	A2B	ADORA2B
AA3R	P0DMS8	A3	21	A	Nucleotide	Adenosine	adenosine A3 receptor	A3	ADORA3
ACKR3	P25106	ACKR3	80	A	Protein	Chemokine	atypical chemokine receptor 3
ACKR4	Q9NPB9	ACKR4	315	A	Protein	Chemokine	atypical chemokine receptor 4
ACM1	P11229	M1	13	A	Aminergic	Acetylcholine(muscarinic)	cholinergic receptor muscarinic 1	M1R/CHRM1	CHRM1
ACM2	P08172	M2	14	A	Aminergic	Acetylcholine(muscarinic)	cholinergic receptor muscarinic 2	M2R/CHRM2	CHRM2
ACM3	P20309	M3	15	A	Aminergic	Acetylcholine(muscarinic)	cholinergic receptor muscarinic 3	M3R/CHRM3	CHRM3
ACM4	P08173	M4	16	A	Aminergic	Acetylcholine(muscarinic)	cholinergic receptor muscarinic 4	M4R/CHRM4	CHRM4
ACM5	P08912	M5	17	A	Aminergic	Acetylcholine(muscarinic)	cholinergic receptor muscarinic 5		CHRM5
ACTHR	Q01718	MC2	283	A	Peptide	Melanocortin	melanocortin 2 receptor
ADA1A	P35348	α1A	22	A	Aminergic	Adrenoceptors	adrenoceptor alpha 1A	α1A-AR	ADRA1A
ADA1B	P35368	α1B	23	A	Aminergic	Adrenoceptors	adrenoceptor alpha 1B		ADRA1B
ADA1D	P25100	α1D	24	A	Aminergic	Adrenoceptors	adrenoceptor alpha 1D		ADRA1D
ADA2A	P08913	α2A	25	A	Aminergic	Adrenoceptors	adrenoceptor alpha 2A	α2A-AR	ADRA2A
ADA2B	P18089	α2B	26	A	Aminergic	Adrenoceptors	adrenoceptor alpha 2B	α2B-AR	ADRA2B
ADA2C	P18825	α2C	27	A	Aminergic	Adrenoceptors	adrenoceptor alpha 2C	α2C-AR	ADRA2C
ADRB1	P08588	β1	28	A	Aminergic	Adrenoceptors	adrenoceptor beta 1	β1-AR	ADRB1
ADRB2	P07550	β2	29	A	Aminergic	Adrenoceptors	adrenoceptor beta 2	β2-AR	ADRB2
ADRB3	P13945	β3	30	A	Aminergic	Adrenoceptors	adrenoceptor beta 3		ADRB3
AGRB1	O14514	ADGRB1	174	B2	Orphan	Adhesionclassorphans	adhesion G protein-coupled receptor B1	0	0
AGRL1	O94910	ADGRL1	206	B2	Orphan	Adhesionclassorphans	adhesion G protein-coupled receptor L1
AGTR1	P30556	AT1	34	A	Peptide	Angiotensin	angiotensin II receptor type 1	AT1R	AGTR1
AGTR2	P50052	AT2	35	A	Peptide	Angiotensin	angiotensin II receptor type 2
APJ	P35414	APLNR	36	A	Peptide	Apelin	apelin receptor	APJ	APLNR
BKRB1	P46663	B1	41	A	Peptide	Bradykinin	bradykinin receptor B1	B1R	BDKRB1
BKRB2	P30411	B2	42	A	Peptide	Bradykinin	bradykinin receptor B2	B2R	BDKRB2
C3AR	Q16581	C3a	31	A	Peptide	Complementpeptide	complement C3a receptor 1
C5AR1	P21730	C5a1	32	A	Peptide	Complementpeptide	complement C5a receptor 1	C5aR1
C5AR2	Q9P296	C5a2	33	A	Peptide	Complementpeptide	complement component 5a receptor 2
CALCR	P30988	CT	43	B1	Peptide	Calcitonin	calcitonin receptor	CTR (hCALCR)
CALCR+RAMP1		AMY1		B1	Peptide	Calcitonin		AMY1	#N/A
CALCR+RAMP2		AMY2		B1	Peptide	Calcitonin		AMY2	#N/A
CALCR+RAMP3		AMY3		B1	Peptide	Calcitonin		AMY3	#N/A
CASR	P41180	CaS	54	C	Ion	Calcium-sensing	calcium sensing receptor
CCKAR	P32238	CCK1	76	A	Peptide	Cholecystokinin	cholecystokinin A receptor	CCK1 (CCKA)	CCKAR
CCR1	P32246	CCR1	58	A	Protein	Chemokine	C-C motif chemokine receptor 1
CCR10	P46092	CCR10	67	A	Protein	Chemokine	C-C motif chemokine receptor 10
CCR2	P41597	CCR2	59	A	Protein	Chemokine	C-C motif chemokine receptor 2
CCR3	P51677	CCR3	60	A	Protein	Chemokine	C-C motif chemokine receptor 3
CCR4	P51679	CCR4	61	A	Protein	Chemokine	C-C motif chemokine receptor 4
CCR5	P51681	CCR5	62	A	Protein	Chemokine	C-C motif chemokine receptor 5	CCR5
CCR6	P51684	CCR6	63	A	Protein	Chemokine	C-C motif chemokine receptor 6	CCR6
CCR7	P32248	CCR7	64	A	Protein	Chemokine	C-C motif chemokine receptor 7
CCR8	P51685	CCR8	65	A	Protein	Chemokine	C-C motif chemokine receptor 8
CCR9	P51686	CCR9	66	A	Protein	Chemokine	C-C motif chemokine receptor 9
CCRL2	O00421	CCRL2	78	A	Protein	Chemokine	C-C motif chemokine receptor like 2
CLTR1	Q9Y271	CysLT1	269	A	Lipid	Leukotriene	cysteinyl leukotriene receptor 1	Cys-LT1R	CYSLTR1
CLTR2	Q9NS75	CysLT2	270	A	Lipid	Leukotriene	cysteinyl leukotriene receptor 2	Cys-LT2R	CYSLTR2
CML1	Q99788	Chemerin	79	A	Protein	Chemerinreceptor	chemerin chemokine-like receptor 1		LTB4R
CNR1	P21554	CB1	56	A	Lipid	Cannabinoid	cannabinoid receptor 1	CB1	CNR1
CNR2	P34972	CB2	57	A	Lipid	Cannabinoid	cannabinoid receptor 2	CB2	CNR2
CRFR1	P34998	CRF1	213	B1	Peptide	Corticotropin-releasingfact	corticotropin releasing hormone receptor 1	CRFR1
CRFR2	Q13324	CRF2	213	B1	Peptide	Corticotropin-releasingfact	corticotropin releasing hormone receptor 2	CRFR2
CX3C1	P49238	CX3CR1	74	A	Protein	Chemokine	C-X3-C motif chemokine receptor 1
CXCR1	P25024	CXCR1	68	A	Protein	Chemokine	C-X-C motif chemokine receptor 1
CXCR2	P25025	CXCR2	69	A	Protein	Chemokine	C-X-C motif chemokine receptor 2	CXCR2
CXCR3	P49682	CXCR3	70	A	Protein	Chemokine	C-X-C motif chemokine receptor 3
CXCR4	P61073	CXCR4	71	A	Protein	Chemokine	C-X-C motif chemokine receptor 4	CXCR4
CXCR5	P32302	CXCR5	72	A	Protein	Chemokine	C-X-C motif chemokine receptor 5	CXCR5
CXCR6	O00574	CXCR6	73	A	Protein	Chemokine	C-X-C motif chemokine receptor 6
DRD1	P21728	D1	214	A	Aminergic	Dopamine	dopamine receptor D1	D1R	DRD1
DRD2	P14416	D2	215	A	Aminergic	Dopamine	dopamine receptor D2	D2R	DRD2
DRD3	P35462	D3	216	A	Aminergic	Dopamine	dopamine receptor D3		DRD3
DRD4	P21917	D4	217	A	Aminergic	Dopamine	dopamine receptor D4		DRD4
DRD5	P21918	D5	218	A	Aminergic	Dopamine	dopamine receptor D5	D5R	DRD5
EDNRA	P25101	ETA	219	A	Peptide	Endothelin	endothelin receptor type A	ETAR (Endothelin 1A)	EDNRA
EDNRB	P24530	ETB	220	A	Peptide	Endothelin	endothelin receptor type B		EDNRB
FFAR1	O14842	FFA1	225	A	Lipid	Freefattyacid	free fatty acid receptor 1		FFAR1
FFAR2	O15552	FFA2	226	A	Lipid	Freefattyacid	free fatty acid receptor 2	GPR43 (FFAR2)	FFAR2
FFAR3	O14843	FFA3	227	A	Lipid	Freefattyacid	free fatty acid receptor 3	GPR41 (FFAR3)	FFAR3
FFAR4	Q5NUL3	FFA4	127	A	Lipid	Freefattyacid	free fatty acid receptor 4	GPR120s	FFAR4
FPR1	P21462	FPR1	222	A	Peptide	Formylpeptide	formyl peptide receptor 1		FPR1
FPR2	P25090	FPR2/ALX	223	A	Peptide	Formylpeptide	formyl peptide receptor 2		FPR2
FPR3	P25089	FPR3	224	A	Peptide	Formylpeptide	formyl peptide receptor 3
FSHR	P23945	FSH	253	A	Protein	Glycoproteinhormone	follicle stimulating hormone receptor
FZD1	Q9UP38	FZD1	229	F	Protein	Frizzled	frizzled class receptor 1
FZD2	Q14332	FZD2	230	F	Protein	Frizzled	frizzled class receptor 2
FZD6	O60353	FZD6	234	F	Protein	Frizzled	frizzled class receptor 6
G37L1	O60883	GPR37L1	104	A	0	0	G protein-coupled receptor 37 like 1	0	0
GABR1	Q9UBS5	GABAB1	240	C	Aminoacid	GABA<sub>B</sub>	gamma-aminobutyric acid type B receptor subunit 1
GALR1	P47211	GAL1	243	A	Peptide	Galanin	galanin receptor 1		GALR1
GALR2	O43603	GAL2	244	A	Peptide	Galanin	galanin receptor 2		GALR2
GALR3	O60755	GAL3	245	A	Peptide	Galanin	galanin receptor 3		GALR3
GASR	P32239	CCK2	77	A	Peptide	Cholecystokinin	cholecystokinin B receptor		CCKBR
GHRHR	Q02643	GHRH	247	B1	Peptide	Glucagonreceptorfamily	growth hormone releasing hormone receptor
GHSR	Q92847	Ghrelin	246	A	Peptide	Ghrelin	growth hormone secretagogue receptor	GHSR	GHSR
GIPR	P48546	GIP	248	B1	Peptide	Glucagonreceptorfamily	gastric inhibitory polypeptide receptor	GIPR	GIPR
GLP1R	P43220	GLP-1	249	B1	Peptide	Glucagonreceptorfamily	glucagon like peptide 1 receptor	GLP-1R
GLP2R	O95838	GLP-2	250	B1	Peptide	Glucagonreceptorfamily	glucagon like peptide 2 receptor	GLP-2R
GLR	P47871	Glucagon	251	B1	Peptide	Glucagonreceptorfamily	glucagon receptor	GCGR
GNRHR	P30968	GnRH1	256	A	Peptide	Gonadotrophin-releasinghorm	gonadotropin releasing hormone receptor	GnRHR	GNRHR
GP107	Q5VW38	GPR107	651	O	Orphan	OtherGPCRorphans	G protein-coupled receptor 107
GP119	Q8TDV5	GPR119	126	A	Lipid	GPR18	G protein-coupled receptor 119		GPR119
GP132	Q9UNW8	GPR132	128	A	Orphan	ClassAorphans	G protein-coupled receptor 132		GPR132
GP139	Q6DWJ6	GPR139	130	A	Orphan	ClassAorphans	G protein-coupled receptor 139
GP143	P51810	GPR143	203	O	Orphan	OtherGPCRorphans	G protein-coupled receptor 143
GP174	Q9BXC1	GPR174	145	A	Orphan	ClassAorphans	G protein-coupled receptor 174		GPR174
GP183	P32249	GPR183	81	A	Orphan	ClassAorphans	G protein-coupled receptor 183	GPR183	GPR183
GPBAR	Q8TDU6	GPBA	37	A	Steroid	Bileacid	G protein-coupled bile acid receptor 1	TGR5 (GPBAR1)
GPC6A	Q5T6X5	GPRC6	55	C	Ion	Calcium-sensing	G protein-coupled receptor class C group 6 member A
GPER1	Q99527	GPER	221	A	Steroid	Estrogen(Gprotein-coupled)	G protein-coupled estrogen receptor 1
GPR1	P46091	GPR1	82	A	Orphan	ClassAorphans	G protein-coupled receptor 1
GPR12	P47775	GPR12	86	A	Orphan	ClassAorphans	G protein-coupled receptor 12
GPR17	Q13304	GPR17	88	A	Orphan	ClassAorphans	G protein-coupled receptor 17		GPR17
GPR18	Q14330	GPR18	89	A	Lipid	GPR18	G protein-coupled receptor 18
GPR3	P46089	GPR3	83	A	Orphan	ClassAorphans	G protein-coupled receptor 3
GPR31	O00270	GPR31	98	A	Orphan	ClassAorphans	G protein-coupled receptor 31
GPR32	O75388	GPR32	99	A	Orphan	ClassAorphans	G protein-coupled receptor 32
GPR34	Q9UPC5	GPR34	101	A	Orphan	ClassAorphans	G protein-coupled receptor 34		GPR34
GPR35	Q9HC97	GPR35	102	A	Orphan	ClassAorphans	G protein-coupled receptor 35		GPR35
GPR37	O15354	GPR37	103	A	Orphan	ClassAorphans	G protein-coupled receptor 37
GPR39	O43194	GPR39	105	A	Orphan	ClassAorphans	G protein-coupled receptor 39	GPR39
GPR55	Q9Y2T6	GPR55	109	A	Lipid	GPR18	G protein-coupled receptor 55		GPR55
GPR6	P46095	GPR6	85	A	Orphan	ClassAorphans	G protein-coupled receptor 6
GPR63	Q9BZJ6	GPR63	112	A	Orphan	ClassAorphans	G protein-coupled receptor 63
GPR75	O95800	GPR75	115	A	Orphan	ClassAorphans	G protein-coupled receptor 75
GPR87	Q9BY21	GPR87	122	A	Orphan	ClassAorphans	G protein-coupled receptor 87
GRM1	Q13255	mGlu1	289	C	Aminoacid	Metabotropicglutamate	glutamate metabotropic receptor 1
GRM2	Q14416	mGlu2	290	C	Aminoacid	Metabotropicglutamate	glutamate metabotropic receptor 2	GRM2 + EAAC/EAAT
GRM3	Q14832	mGlu3	291	C	Aminoacid	Metabotropicglutamate	glutamate metabotropic receptor 3
GRM4	Q14833	mGlu4	292	C	Aminoacid	Metabotropicglutamate	glutamate metabotropic receptor 4	GRM4 + EAAC/EAAT
GRM5	P41594	mGlu5	293	C	Aminoacid	Metabotropicglutamate	glutamate metabotropic receptor 5	GRM5 + EAAC/EAAT
GRM6	O15303	mGlu6	294	C	Aminoacid	Metabotropicglutamate	glutamate metabotropic receptor 6	GRM6+ EAAC/EAAT
GRM7	Q14831	mGlu7	295	C	Aminoacid	Metabotropicglutamate	glutamate metabotropic receptor 7
GRM8	O00222	mGlu8	296	C	Aminoacid	Metabotropicglutamate	glutamate metabotropic receptor 8	GRM8 + EAAC/EAAT
GRPR	P30550	BB2	39	A	Peptide	Bombesin	gastrin releasing peptide receptor		GRPR
HCAR1	Q9BXC0	HCA1	311	A	Alicarboxylicacid	Hydroxycarboxylicacid	hydroxycarboxylic acid receptor 1
HCAR2	Q8TDS4	HCA2	312	A	Alicarboxylicacid	Hydroxycarboxylicacid	hydroxycarboxylic acid receptor 2	GPR109a (hHCAR2)
HCAR3	P49019	HCA3	313	A	Alicarboxylicacid	Hydroxycarboxylicacid	hydroxycarboxylic acid receptor 3	HCAR3
HRH1	P35367	H1	262	A	Aminergic	Histamine	histamine receptor H1	H1R	HRH1
HRH2	P25021	H2	263	A	Aminergic	Histamine	histamine receptor H2	H2R	HRH2
HRH3	Q9Y5N1	H3	264	A	Aminergic	Histamine	histamine receptor H3		HRH3
HRH4	Q9H3N8	H4	265	A	Aminergic	Histamine	histamine receptor H4		HRH4
KISSR	Q969F8	Kisspeptin	266	A	Peptide	Kisspeptin	KISS1 receptor		KISS1R
LGR4	Q9BXB1	LGR4	147	A	Orphan	ClassAorphans	leucine rich repeat containing G protein-coupled receptor 4
LGR5	O75473	LGR5	148	A	Orphan	ClassAorphans	leucine rich repeat containing G protein-coupled receptor 5
LGR6	Q9HBX8	LGR6	149	A	Orphan	ClassAorphans	leucine rich repeat containing G protein-coupled receptor 6
LPAR1	Q92633	LPA1	272	A	Lipid	Lysophospholipid(LPA)	lysophosphatidic acid receptor 1	LPAR1	LPAR1
LPAR2	Q9HBW0	LPA2	273	A	Lipid	Lysophospholipid(LPA)	lysophosphatidic acid receptor 2	LPAR2	LPAR2
LPAR3	Q9UBY5	LPA3	274	A	Lipid	Lysophospholipid(LPA)	lysophosphatidic acid receptor 3		LPAR3
LPAR4	Q99677	LPA4	94	A	Lipid	Lysophospholipid(LPA)	lysophosphatidic acid receptor 4		LPAR4
LPAR5	Q9H1C0	LPA5	124	A	Lipid	Lysophospholipid(LPA)	lysophosphatidic acid receptor 5		LPAR5
LPAR6	P43657	LPA6	163	A	Lipid	Lysophospholipid(LPA)	lysophosphatidic acid receptor 6		LPAR6
LSHR	P22888	LH	254	A	Protein	Glycoproteinhormone	luteinizing hormone/choriogonadotropin receptor
LT4R1	Q15722	BLT1	267	A	Lipid	Leukotriene	leukotriene B4 receptor	BLT1
LT4R2	Q9NPC1	BLT2	268	A	Lipid	Leukotriene	leukotriene B4 receptor 2	BLT2	LTB4R2
MC3R	P41968	MC3	284	A	Peptide	Melanocortin	melanocortin 3 receptor	MC3R	MC3R
MC4R	P32245	MC4	285	A	Peptide	Melanocortin	melanocortin 4 receptor	MC4R	MC4R
MC5R	P33032	MC5	286	A	Peptide	Melanocortin	melanocortin 5 receptor		MC5R
MCHR1	Q99705	MCH1	280	A	Peptide	Melanin-concentratinghormon	melanin concentrating hormone receptor 1		MCHR1
MCHR2	Q969V1	MCH2	281	A	Peptide	Melanin-concentratinghormon	melanin concentrating hormone receptor 2		MCHR2
MRGRD	Q8TDS7	MRGPRD	152	A	Orphan	ClassAorphans	MAS related GPR family member D
MRGX1	Q96LB2	MRGPRX1	156	A	Orphan	ClassAorphans	MAS related GPR family member X1		MRGPRX1
MRGX2	Q96LB1	MRGPRX2	157	A	Orphan	ClassAorphans	MAS related GPR family member X2		MRGPRX2
MSHR	Q01726	MC1	282	A	Peptide	Melanocortin	melanocortin 1 receptor		MC1R
MTLR	O43193	motilin	297	A	Peptide	Motilin	motilin receptor		MLNR
MTR1A	P48039	MT1	287	A	Melatonin	Melatonin	melatonin receptor 1A	MT1R	MTNR1A
MTR1B	P49286	MT2	288	A	Melatonin	Melatonin	melatonin receptor 1B	MT2R	MTNR1B
NK1R	P25103	NK1	360	A	Peptide	Tachykinin	tachykinin receptor 1		TACR1
NK2R	P21452	NK2	361	A	Peptide	Tachykinin	tachykinin receptor 2		TACR3
NK3R	P29371	NK3	362	A	Peptide	Tachykinin	tachykinin receptor 3		TACR2
NMBR	P28336	BB1	38	A	Peptide	Bombesin	neuromedin B receptor		NMBR
NMUR1	Q9HB89	NMU1	298	A	Peptide	NeuromedinU	neuromedin U receptor 1		NMUR1
NMUR2	Q9GZQ4	NMU2	299	A	Peptide	NeuromedinU	neuromedin U receptor 2		NMUR2
NPBW1	P48145	NPBW1	303	A	Peptide	NeuropeptideW/neuropeptide	neuropeptides B and W receptor 1		NPBWR1
NPBW2	P48146	NPBW2	304	A	Peptide	NeuropeptideW/neuropeptide	neuropeptides B and W receptor 2
NPFF1	Q9GZQ6	NPFF1	300	A	Peptide	NeuropeptideFF/neuropeptide	neuropeptide FF receptor 1	NPFFR1	NPFFR1
NPFF2	Q9Y5X5	NPFF2	301	A	Peptide	NeuropeptideFF/neuropeptide	neuropeptide FF receptor 2	NPFFR2	NPFFR2
NPSR1	Q6W5P4	NPS	302	A	Peptide	NeuropeptideS	neuropeptide S receptor 1
NPY1R	P25929	Y1	305	A	Peptide	NeuropeptideY	neuropeptide Y receptor Y1	NPY1R
NPY2R	P49146	Y2	306	A	Peptide	NeuropeptideY	neuropeptide Y receptor Y2
NPY4R	P50391	Y4	307	A	Peptide	NeuropeptideY	neuropeptide Y receptor Y4
NPY5R	Q15761	Y5	308	A	Peptide	NeuropeptideY	neuropeptide Y receptor Y5	NPY5R
NTR1	P30989	NTS1	309	A	Peptide	Neurotensin	neurotensin receptor 1
NTR2	O95665	NTS2	310	A	Peptide	Neurotensin	neurotensin receptor 2
OPRD	P41143	𝛅	317	A	Peptide	Opioid	opioid receptor delta 1	DOR	OPRD1
OPRK	P41145	𝜅	318	A	Peptide	Opioid	opioid receptor kappa 1	KOR	OPRK1
OPRM	P35372	μ	319	A	Peptide	Opioid	opioid receptor mu 1	MOR	OPRM1
OPRX	P41146	NOP	320	A	Peptide	Opioid	opioid related nociceptin receptor 1	NOP	OPRL1
OX1R	O43613	OX1	321	A	Peptide	Orexin	hypocretin receptor 1		HCRTR1
OX2R	O43614	OX2	322	A	Peptide	Orexin	hypocretin receptor 2	CRTR2 (OX2)	HCRTR2
OXER1	Q8TDS5	OXE	271	A	Lipid	Leukotriene	oxoeicosanoid receptor 1
OXGR1	Q96P68	Oxoglutarate	162	A	Alicarboxylicacid	Oxoglutarate	oxoglutarate receptor 1		OXGR1
OXYR	P30559	OT	369	A	Peptide	Vasopressinandoxytocin	oxytocin receptor	OTR	OXTR
P2RY1	P47900	P2Y1	323	A	Nucleotide	P2Y	purinergic receptor P2Y1		P2RY1
P2RY2	P41231	P2Y2	324	A	Nucleotide	P2Y	purinergic receptor P2Y2	P2YR2	P2RY2
P2RY4	P51582	P2Y4	325	A	Nucleotide	P2Y	pyrimidinergic receptor P2Y4		P2RY4
P2RY6	Q15077	P2Y6	326	A	Nucleotide	P2Y	pyrimidinergic receptor P2Y6		P2RY6
P2Y10	O00398	P2RY10	165	A	Orphan	ClassAorphans	P2Y receptor family member 10		P2RY10
P2Y11	Q96G91	P2Y11	327	A	Nucleotide	P2Y	purinergic receptor P2Y11		P2RY11
P2Y12	Q9H244	P2Y12	328	A	Nucleotide	P2Y	purinergic receptor P2Y12		P2RY12
P2Y13	Q9BPV8	P2Y13	329	A	Nucleotide	P2Y	purinergic receptor P2Y13		P2RY13
P2Y14	Q15391	P2Y14	330	A	Nucleotide	P2Y	purinergic receptor P2Y14		P2RY14
PACR	P41586	PAC1	370	B1	Peptide	VIPandPACAP	ADCYAP receptor type I		ADCYAP1R1
PAR1	P25116	PAR1	347	A	Peptide	Proteinase-activated	coagulation factor II thrombin receptor	PAR-1	F2R
PAR3	O00254	PAR3	349	A	Peptide	Proteinase-activated	coagulation factor II thrombin receptor like 2		F2RL2
PAR4	Q96RI0	PAR4	350	A	Peptide	Proteinase-activated	F2R like thrombin or trypsin receptor 3		F2RL3
PD2R	Q13258	DP1	338	A	Lipid	Prostanoid	prostaglandin D2 receptor		PTGDR
PD2R2	Q9Y5Y4	DP2	339	A	Lipid	Prostanoid	prostaglandin D2 receptor 2
PE2R1	P34995	EP1	340	A	Lipid	Prostanoid	prostaglandin E receptor 1	EP1R (hPTGER1)	PTGER1
PE2R2	P43116	EP2	341	A	Lipid	Prostanoid	prostaglandin E receptor 2	EP2R (hTGER2)	PTGER2
PE2R3	P43115	EP3	342	A	Lipid	Prostanoid	prostaglandin E receptor 3	EP3 (hPTGER3)	PTGER3
PE2R4	P35408	EP4	343	A	Lipid	Prostanoid	prostaglandin E receptor 4	EP4 (PTGER4)	PTGER4
PF2R	P43088	FP	344	A	Lipid	Prostanoid	prostaglandin F receptor	FP (PF2R)	PTGFR
PI2R	P43119	IP	345	A	Lipid	Prostanoid	prostaglandin I2 receptor		PTGIR
PKR1	Q8TCW9	PKR1	335	A	Protein	Prokineticin	prokineticin receptor 1
PKR2	Q8NFJ6	PKR2	336	A	Protein	Prokineticin	prokineticin receptor 2
PRLHR	P49683	PrRP	337	A	Peptide	Prolactin-releasingpeptide	prolactin releasing hormone receptor		PRLHR
PTAFR	P25105	PAF	334	A	Lipid	Platelet-activatingfactor	platelet activating factor receptor		PTAFR
PTH1R	Q03431	PTH1	331	B1	Peptide	Parathyroidhormone	parathyroid hormone 1 receptor	PTH1R	PTH1R
PTH2R	P49190	PTH2	332	B1	Peptide	Parathyroidhormone	parathyroid hormone 2 receptor		PTH2R
QRFPR	Q96P65	QRFP	333	A	Peptide	PeptideP518	pyroglutamylated RFamide peptide receptor
RL3R1	Q9NSD7	RXFP3	353	A	Peptide	Relaxinfamilypeptide	relaxin family peptide receptor 3
RL3R2	Q8TDU9	RXFP4	354	A	Peptide	Relaxinfamilypeptide	relaxin family peptide/INSL5 receptor 4
RXFP1	Q9HBX9	RXFP1	351	A	Peptide	Relaxinfamilypeptide	relaxin family peptide receptor 1
RXFP2	Q8WXD0	RXFP2	352	A	Peptide	Relaxinfamilypeptide	relaxin family peptide receptor 2
S1PR1	P21453	S1P1	275	A	Lipid	Lysophospholipid(S1P)	sphingosine-1-phosphate receptor 1	S1PR1	S1PR1
S1PR2	O95136	S1P2	276	A	Lipid	Lysophospholipid(S1P)	sphingosine-1-phosphate receptor 2		S1PR2
S1PR3	Q99500	S1P3	277	A	Lipid	Lysophospholipid(S1P)	sphingosine-1-phosphate receptor 3		S1PR3
S1PR4	O95977	S1P4	278	A	Lipid	Lysophospholipid(S1P)	sphingosine-1-phosphate receptor 4
S1PR5	Q9H228	S1P5	279	A	Lipid	Lysophospholipid(S1P)	sphingosine-1-phosphate receptor 5		S1PR5
SCTR	P47872	Secretin	252	B1	Peptide	Glucagonreceptorfamily	secretin receptor
SSR1	P30872	SST1	355	A	Peptide	Somatostatin	somatostatin receptor 1		SSTR1
SSR2	P30874	SST2	356	A	Peptide	Somatostatin	somatostatin receptor 2	SST2A	SSTR2
SSR3	P32745	SST3	357	A	Peptide	Somatostatin	somatostatin receptor 3		SSTR3
SSR4	P31391	SST4	358	A	Peptide	Somatostatin	somatostatin receptor 4		SSTR4
SSR5	P35346	SST5	359	A	Peptide	Somatostatin	somatostatin receptor 5		SSTR5
SUCR1	Q9BXA5	Succinate	166	A	Alicarboxylicacid	Succinate	succinate receptor 1
TA2R	P21731	TP	346	A	Lipid	Prostanoid	thromboxane A2 receptor		TBXA2R
TAAR1	Q96RJ0	TA1	364	A	Aminergic	Traceamine	trace amine associated receptor 1
TAAR3	Q9P1P4	TAAR3	168	A	Orphan	ClassAorphans	trace amine associated receptor 3, pseudogene
TRFR	P34981	TRH1	363	A	Peptide	Thyrotropin-releasinghormon	thyrotropin releasing hormone receptor
TSHR	P16473	TSH	255	A	Protein	Glycoproteinhormone	thyroid stimulating hormone receptor
UR2R	Q9UKP6	UT	365	A	Peptide	Urotensin	urotensin 2 receptor		UTS2R
V1AR	P37288	V1A	366	A	Peptide	Vasopressinandoxytocin	arginine vasopressin receptor 1A	V1AR	AVPR1A
V1BR	P47901	V1B	367	A	Peptide	Vasopressinandoxytocin	arginine vasopressin receptor 1B		AVPR1B
V2R	P30518	V2	368	A	Peptide	Vasopressinandoxytocin	arginine vasopressin receptor 2	V2R	AVPR2
VIPR1	P32241	VPAC1	371	B1	Peptide	VIPandPACAP	vasoactive intestinal peptide receptor 1	VIP1R
VIPR2	P41587	VPAC2	372	B1	Peptide	VIPandPACAP	vasoactive intestinal peptide receptor 2
XCR1	P46094	XCR1	75	A	Protein	Chemokine	X-C motif chemokine receptor 1
Not in UniProt		M3D		#N/A	#N/A	#N/A		#N/A	#N/A
Not in UniProt		M3DSHORT		#N/A	#N/A	#N/A		#N/A	#N/A
Not in UniProt, pseudogene		GPR79P		#N/A	#N/A	#N/A		#N/A	#N/A
O51E1				O

## Sheet: B-EmEC
UniProt	IUPHAR	B-Basal SD Gs	B-Basal SD Gi1	B-Basal SD Gi2	B-Basal SD GoA	B-Basal SD GoB	B-Basal SD Gz	B-Basal SD Gq	B-Basal SD G11	B-Basal SD G14	B-Basal SD G15	B-Basal SD G12	B-Basal SD G13	B-Basal SD βarr1 /GRK2	B-Basal SD βarr2	B-Basal SD βarr2 /GRK2	B-Emax Gs	B-Emax Gi1	B-Emax Gi2	B-Emax GoA	B-Emax GoB	B-Emax Gz	B-Emax Gq	B-Emax G11	B-Emax G14	B-Emax G15	B-Emax G12	B-Emax G13	B-Emax βarr1 /GRK2	B-Emax βarr2	B-Emax βarr2 /GRK2	#SDs Gs	#SDs Gi1	#SDs Gi2	#SDs GoA	#SDs GoB	#SDs Gz	#SDs Gq	#SDs G11	#SDs G14	#SDs G15	#SDs G12	#SDs G13	#SDs βarr1 /GRK2	#SDs βarr2	#SDs βarr2 /GRK2	B-Emax >1.4SD Gs	B-Emax >1.4SD Gi1	B-Emax >1.4SD Gi2
5HT1A	5-HT1A	12.5066	26.6829	12.1277	4.01581	18.4737	30.1797	30.4072	18.7591	8.50274	22.3918	3.99362	0.600112	14.5103	44.3362	51.6857		630.6	379.3	219	333.7	192.4			148.1	807.6			95.06	94.22	181.7		23.6331	31.2756	54.5344	18.0636	6.37514			17.4179	36.0667			6.55119	2.12512	3.51548		630.6	379.3
5HT1B	5-HT1B	17.7071	28.6743	24.1586	27.5783	23.1591	6.68537	14.4331	4.63747	16.4519	14.0259	14.7651	11.9965	17.1294	12.2406	27.0965		177.5	160.4	86.86	123.1	131.2				128.1			36.35	25.31	57.78		6.19021	6.63945	3.14958	5.3154	19.6249				9.13311			2.12208	2.0677	2.13238		177.5	160.4
5HT1D	5-HT1D	9.40739	37.9534	9.13656	20.4054	17.3735	35.6647	8.29416	5.71903	5.22215	11.5147	6.75652	15.6626	17.3299	5.17714	5.4599		91.36	108.9	73.33	88.15	134.5											2.40716	11.9192	3.59365	5.07383	3.77124											91.36	108.9
5HT2A	5-HT2A	8.67339	32.727	22.7864	23.6155	11.948	69.1293	15.498	9.98177	11.9011	8.83994	29.3255	39.2428	30.6951	13.7314	6.06057		83.16	32.71	33.96	58.27	150.9	146.4	111.5	261.3	775.5			518.1	341.1	778.6		2.54102	1.4355	1.43804	4.87695	2.18287	9.44641	11.1704	21.956	87.7268			16.8789	24.841	128.47		83.16	32.71
5HT2B	5-HT2B	37.6091	38.2358	36.6854	51.1394	10.2493	11.8274	26.0302	16.7495	20.7639	18.7065	24.6738	28.5661	31.5098	17.9381	14.435					66.32	80.21	184.5	200.9	238	121.1			171.6	51.78	247.2					6.47067	6.78169	7.08791	11.9944	11.4622	6.47368			5.44592	2.88659	17.1251
5HT2C	5-HT2C	9.33785	6.21216	10.5909	11.657	11.3573	7.84888	13.8235	10.9971	17.5632	13.2498	17.6709	8.55694	22.393	17.8714	29.561		402	259.5	226.4	487.9	237.3				662.8	101.8	316.9	1564	511.9	705		64.7118	24.5022	19.4219	42.9593	30.2336				50.0234	5.7609	37.0343	69.8433	28.6435	23.849		402	259.5
AA1R	A1	10.2249	15.1943	12.7531	12.0758	18.5603	12.397	8.72891	6.75782	9.1796	8.45594	21.5448	13.3954	35.5283	9.46445	8.94044		19.1	13.11	31.07	57.68	25.82				87.22	76.08			39.68	61.73		1.25705	1.02799	2.57292	3.10772	2.08276				10.3146	3.53125			4.19253	6.90458
AA2AR	A2A	6.862	20.0595	6.89615	7.84128	8.40209	51.0922	24.8215	27.2642	18.7984	13.1452	18.8798	14.1912	9.18034	19.537	38.6114	22.17									107	71.36	144.7				3.23084									8.13984	3.77971	10.1964				22.17
AA2BR	A2B	23.8461	2.32851	13.2112	6.85696	26.0777	31.8108	17.9362	19.2519	14.5717	22.1033	9.06608	8.63624	31.1443	24.085	22.6852	51.87									689.4						2.1752									31.19						51.87
AA3R	A3	15.8267	16.1767	19.7268	8.45594	8.40209	15.9576	15.5538	13.3335	21.8147	13.5933	24.5045	17.8306	22.4846	11.7533	25.3976		450.4	271.8	18.61	19.52					49.84							27.8426	13.7782	2.20082	2.32323					3.66652							450.4	271.8
ACM1	M1	6.71655	23.9398	11.2259	22.3164	22.1745	14.2257	15.5752	9.54572	6.19946	12.3307	2.82824	8.14782	11.2798	3.86024	11.2269	34.28	266.4	161.5	122.8	218.5	208	542.3	609.6	763.6	891.1				103.3	204	5.10381	11.1279	14.3863	5.50268	9.85368	14.6214	34.8182	63.8611	123.172	72.2668				26.76	18.1706	34.28	266.4	161.5
ACM2	M2	7.71061	6.47084	6.04843	8.64295	5.27895	12.3409	6.22826	5.97779	0.989943	6.24406	4.22309	15.1823	9.44965	7.11456	11.2884	22.33	666.8	390.4	244	335.3	260.8			120	957.3			1439	822	1165	2.89601	103.047	64.5457	28.2311	63.5164	21.133			121.219	153.314			152.281	115.538	103.204	22.33	666.8	390.4
ACM3	M3	19.6957	8.5807	7.7895	8.96421	7.92337	6.64089	11.8932	8.77219	11.1086	16.9474	11.4911	2.74706	9.73219	8.43454	2.75351		335	116.8	110.8	165.8	118.7	616.6	769.2	924.1	1067			35.89	64.21	217.2		39.0411	14.9945	12.3603	20.9254	17.8741	51.8448	87.6862	83.1878	62.9595			3.68776	7.61274	78.8811		335	116.8
ACM4	M4	17.2648	14.565	8.84835	20.1353	17.5977	17.0302	7.87264	26.2425	8.35348	10.5705	9.93076	10.9712	29.9728	8.4032	3.67301		698	604.3	276.6	342.5	153.2	73.22		144.6	869.3			663.3	224.3	712		47.9231	68.2952	13.7371	19.4628	8.99576	9.30056		17.3101	82.2382			22.1301	26.6922	193.846		698	604.3
ADA1A	α1A	13.3562	26.0302	22.3779	20.7639	5.81493	43.1441	24.58	24.5932	27.9797	12.6095	23.1318	29.7835	47.2494	50.4504	15.5408	37.2	41.59		38.1			692	746.9	827.5	1040					19	2.78522	1.59776		1.83492			28.153	30.3701	29.575	82.4776					1.22259	37.2	41.59
ADA2A	α2A	5.82156	37.0993	59.7356	51.4434	50.3652	3.71132	21.9562	6.35153	23.7843	20.0147	11.4811	2.97008	29.801	20.3697	27.0778	18.02	861.2	486.1	237.9	388.5	111.7	56.39	29.2	65.56	870.3	67.7	452	659	365.6	666.3	3.09539	23.2134	8.13752	4.6245	7.71366	30.0971	2.5683	4.59732	2.75645	43.4831	5.89663	152.184	22.1134	17.9482	24.6069	18.02	861.2	486.1
ADA2B	α2B	14.9961	26.0735	4.05883	69.4422	54.1241	43.6372	11.5252	16.9452	3.26546	5.26285	29.8181	30.0862	38.2988	21.9796	11.0693		620.8	318.5	192.2	347	159.4				264			149.7	75.76	359.5		23.8097	78.471	2.76777	6.41119	3.65284				50.163			3.90873	3.44684	32.4773		620.8	318.5
ADA2C	α2C	9.30966	21.0624	14.7142	15.1984	8.24954	16.5556	22.7417	20.8583	22.9256	19.1446	3.38156	7.84178	34.17	22.4909	26.1797		758.3	382.4	278.6	361.8	136.8				130.1		34.78	144.6	88.95	250.9		36.0025	25.9885	18.3309	43.857	8.26305				6.79566		4.43522	4.23179	3.95494	9.58376		758.3	382.4
ADRB1	β1	7.40649	1.79424	5.85261	8.55286	46.3967	34.3266	10.1662	18.5235	26.4563	12.0626	6.42477	10.9105	5.73482	16.9484	37.5018	55.19			56.27	153.4	148.4	34.72		192.9	704.4	96.01	94.88	322.1	201.1	332.4	7.45158			6.57909	3.30627	4.32318	3.41523		7.29127	58.3955	14.9437	8.69624	56.1656	11.8655	8.86356	55.19
ADRB2	β2	16.7309	26.5733	11.0341	21.2507	22.9466	24.2754	15.4255	27.7881	11.1841	13.7512	11.5632	8.34993	16.4096	14.0378	17.9227	54.4									767.2			400	376.3	839.5	3.25147									55.7915			24.376	26.8062	46.8399	54.4
AGTR1	AT1	10.8362	17.5565	18.5737	21.8147	10.7037	7.90293	10.2855	7.75932	10.3218	17.4291	13.7375	11.6962	19.8351	11.3489	10.4692		36.59	42.17	45.02	38.07	29.6	249.1	451.1	236.2	225.6	122	580	207.8	89.91	220.6		2.08413	2.27042	2.06375	3.55673	3.74544	24.2186	58.1365	22.8837	12.9438	8.88083	49.5888	10.4764	7.92232	21.0713		36.59	42.17
APJ	APLNR	9.54173	16.2317	20.8421	16.5767	9.07973	10.887	11.8998	13.5684	12.638	17.5565	3.31188	3.8707	22.6548	15.9392	25.9795		538.6	326.5	158	275.9	127				39.35	21.37	32.15	229.2	230.4	176.5		33.1819	15.6654	9.53145	30.3864	11.6653				2.24134	6.45252	8.30599	10.1171	14.4549	6.79383		538.6	326.5
BKRB1	B1	14.0163	25.539	27.6319	21.4085	36.5273	7.03252	10.6605	8.45269	5.3966	9.72991	6.99379	9.70051	58.1581	12.4554	15.2644		94.76	65.7	81.3	161	32.32	171	201.4	161.8	78.92							3.71041	2.37769	3.79756	4.40766	4.59579	16.0405	23.8267	29.9819	8.11107							94.76	65.7
BKRB2	B2	19.1172	32.1543	28.6696	26.2841	26.7464	18.7444	4.43751	21.9333	12.6247	12.1845	8.92329	10.5849	23.2306	13.4925	21.5376		478	257.2	148.9	360.3	203.9	576.1	801.5	871.2	1049	83.18	484	1737	888.7	1180		14.8658	8.97117	5.66502	13.471	10.8779	129.825	36.5426	69.0075	86.0926	9.32168	45.7254	74.7721	65.8662	54.788		478	257.2
C5AR1	C5a1	17.3134	21.2162	16.8098	15.2385	18.2433	15.5961	8.40433	18.4063	8.7586	6.24042	8.30636	12.6169	24.8501	16.5141	9.20086		750.7	408.7	200	401.5	197.6				704.3			2979	1192	2286		35.3834	24.3132	13.1246	22.0081	12.6698				112.861			119.879	72.1809	248.455		750.7	408.7
CALCR	CT	15.88	0.920313	2.23894	5.84212	3.14628	9.21125	14.0087	13.1386	14.6604	11.5185	17.8884	7.97487	3.23249	10.4311	10.4882	35.68	417.6	283.5	249.8	422.4	120.6	202	130.8	260.4	651.9	52.7	232.9	49.74	99.38	191.7	2.24686	453.759	126.622	42.7585	134.254	13.0927	14.4197	9.95541	17.7622	56.5961	2.94605	29.2042	15.3875	9.5273	18.2777	35.68	417.6	283.5
CALCR+RAMP3	AMY3	15.1162	4.38872	14.9626	7.70748	20.8456	17.0424	14.5901	16.5311	16.5669	15.5396	7.27471	5.16923	30.3753	13.4644	14.8774	21.39									122.2	62.32	270.8				1.41504									7.86379	8.56666	52.3869				21.39
CCKAR	CCK1	6.11936	10.562	2.25643	24.7172	17.4997	2.32201	2.81293	2.67317	4.67727	3.38991	13.7798	15.9142	19.0578	1.94963	10.0994	26.09	502	221.6	235.4	240.5	168.4	457.1	547.9	601.5	848.4	94.18	706.2	1374	822	1520	4.26352	47.5288	98.2084	9.52373	13.7431	72.5232	162.5	204.963	128.601	250.272	6.83462	44.3755	72.0963	421.619	150.504	26.09	502	221.6
CCR5	CCR5	12.6126	25.8728	13.3606	20.1584	15.4538	13.5275	19.7006	16.4356	23.7161	13.2826	4.93217	6.57237	40.1052	29.8569	29.8439		508	327.1	199.9	308	108.6				65.21			998.7	301.9	1180		19.6345	24.4825	9.91647	19.9304	8.02809				4.90944			24.902	10.1116	39.5391		508	327.1
CCR6	CCR6	10.0704	32.5581	12.9252	23.0812	3.84706	13.7769	5.96412	11.5588	12.0799	11.5136	3.99362	0.600112	24.9112	4.86335	17.6351		428.6	222.5	59.08	137.9	126.9				146	33.57		151.8	53.12	200.6		13.1642	17.2144	2.55966	35.8456	9.21104				12.6806	8.4059		6.09365	10.9225	11.375		428.6	222.5
CLTR1	CysLT1	14.4701	20.5171	11.5984	7.75051	11.0279	12.1476	7.50884	12.6707	16.0456	8.07422	22.916	14.4566	15.8475	12.5721	18.0306		917	323.7	315.3	437	195.1	656.1	784.6	462.6	770.7			407.3	252.1	448.4		44.6945	27.909	40.6812	39.6266	16.0609	87.377	61.9222	28.8303	95.4519			25.7013	20.0523	24.8688		917	323.7
CLTR2	CysLT2	8.68494	9.58363	5.84763	7.26186	12.1554	23.3221	11.9849	7.47162	12.6369	12.4852	8.48633	11.8245	15.3378	6.82008	5.2234		474.1	196.9	232.5	416.7	177.5	371.5	783.6	619.6	497.1	97.24	609.7	124.8	1337	95.52		49.4698	33.6718	32.0166	34.2811	7.61079	30.9973	104.877	49.0309	39.8151	11.4584	51.5626	8.13678	196.039	18.287		474.1	196.9
CNR1	CB1	17.6461	16.7881	5.61809	16.3492	14.2604	8.82267	12.263	11.3538	14.5901	12.9002	8.05561	10.6255	9.57272	14.6407	25.8154		560	313.6	214.7	303	67.44			26.03	424	51.84	226.7		248.7	243.1		33.3571	55.8197	13.1322	21.2477	7.64394			1.78408	32.8678	6.43527	21.3355		16.9869	9.41685		560	313.6
CNR2	CB2	8.93939	12.792	16.4633	4.25748	7.51131	13.7162	11.4174	11.6801	11.7024	11.6654	17.5649	11.1193	11.9375	9.06181	15.7985		266.7	147.2	152.9	218.1	60.27				16			124.7	46.95	103.2		20.8489	8.94108	35.9133	29.0362	4.39406				1.37158			10.4461	5.18109	6.53227		266.7	147.2
CRFR2	CRF2	11.3408	3.49405	12.8477	14.4777	8.90085	4.12282	8.5483	11.1002	8.78341	8.6628	4.63889	8.14424	19.6648	8.56061	6.54465	57.32	442.2	206.1	158.9	262.6	72.85			13.48	725.2			1418	1093	1444	5.05432	126.558	16.0418	10.9755	29.5028	17.6699			1.53471	83.7143			72.1086	127.678	220.638	57.32	442.2	206.1
CRFR1	CRF1	10.1259	9.51559	22.1826	10.6025	3.67451	7.87457	5.34877	6.10211	11.4637	7.68416	6.50829	18.5565	7.64962	8.78341	2.1739	25.53	28.95	42.7		31.23	64.05				171	105.2	363.9	293	256.2	482.3	2.52125	3.04238	1.92493		8.4991	8.13378				22.2536	16.164	19.6104	38.3025	29.1686	221.86	25.53	28.95	42.7
CXCR2	CXCR2	18.8981	16.8556	28.6086	24.4337	26.7823	20.3028	16.3393	20.9065	10.5813	9.0253	12.1545	8.78909	22.8434	11.2095	22.0211		456.2	242.8	183.3	268	171				511.8			1311	614.5	594.5		27.0652	8.48695	7.50194	10.0066	8.42248				56.7072			57.3908	54.8194	26.9968		456.2	242.8
CXCR4	CXCR4	14.2372	11.794	14.0041	33.1742	33.355	26.7014	4.54754	4.35381	12.666	8.55673	4.93409	1.72476	3.06886	5.30217	17.7929		351.9	202.4	139.5	192	116.7							29.6	67.73	92.98		29.8373	14.4529	4.20507	5.75625	4.37055							9.64528	12.774	5.22569		351.9	202.4
CXCR5	CXCR5	4.95683	19.599	3.86639	8.13363	9.23174	3.4685	24.7097	4.91205	14.7869	15.0102	19.9208	17.1657	35.2597	15.9384	15.6946		814.3	684.6	246.8	494.4	208							1328	659.9	1297		41.5481	177.064	30.3432	53.5544	59.9682							37.6634	41.4032	82.6397		814.3	684.6
DRD1	D1	13.3981	15.467	18.1716	21.5099	20.4288	20.2274	13.3386	10.376	12.7101	12.158	14.3868	21.1345	11.8559	19.7189	8.17679	42.52				156.5	175.4				643.3			437.3	567.5	687.7	3.17358				7.66076	8.67139				52.9117			36.8846	28.7795	84.1039	42.52
DRD2	D2	8.27224	4.39329	7.03912	7.20866	9.24391	14.0775	20.8105	23.835	28.3597	17.4451	18.9395	19.2521	29.184	12.4571	15.6962		699.7	382.9	241.9	333.4	141.6				20			112.2	68.98	213.4		159.266	54.396	33.5568	36.067	10.0586				1.14645			3.84458	5.53742	13.5957		699.7	382.9
DRD5	D5	6.40067	9.6036	11.4454	0.866759	6.60667	8.98015	6.54632	20.8323	9.97864	20.965	32.5289	18.529	16.9695	22.5672	10.5759	49.8	20.55	19.37		97.48					773.3			119.6	265.6	283.2	7.78043	2.13982	1.69239		14.7548					36.8854			7.04793	11.7693	26.778	49.8	20.55	19.37
EDNRA	ETA	9.48127	28.9874	8.35325	9.52796	22.8768	33.8593	4.14482	6.01136	5.293	21.632	9.05991	10.7489	22.2135	14.3071	18.9911	23.07	836.4	387.1	372	463.6	279	494.5	635.6	774.4	388.6	73.51	393.4	588.1	424.3	1581	2.43322	28.8539	46.3412	39.043	20.2651	8.23997	119.305	105.733	146.306	17.9642	8.11377	36.5991	26.4749	29.6567	83.2495	23.07	836.4	387.1
FFAR2	FFA2	19.2789	15.227	6.32553	14.4147	4.05661	5.74213	10.527	7.73213	17.5375	9.95842	15.046	15.557	11.6772	13.7816	14.2502		457.7	250.8				451.9	256.3	77.99								30.0585	39.6488				42.9276	33.1474	4.44705								457.7	250.8
FFAR3	FFA3	4.81821	17.1989	1.67043	18.4219	6.86215	13.6909	11.3293	5.40509	16.2666	7.04242	9.65178	5.97857	3.67353	12.0456	3.42281		366.4	240.2	143.1	203.1	156.7					67.43	471.2					21.3037	143.795	7.76794	29.5971	11.4456					6.98627	78.8148					366.4	240.2
FFAR4	FFA4	7.13256	6.71376	4.37212	6.06332	6.09529	5.81125	23.3522	23.9268	16.2582	14.4464	12.0035	11.0811	25.556	12.3707	11.3203		34.97	23.31	64.02	30.25		197.9	287.8	297.2	475.5		119.9	1088	993.2	999.1		5.2087	5.33151	10.5586	4.96285		8.47456	12.0284	18.28	32.9148		10.8202	42.5732	80.2864	88.2577		34.97	23.31
GHSR	Ghrelin	25.9184	28.7595	26.0062	32.4439	21.3324	10.5146	19.6482	13.6759	15.3029	11.9575	13.3632	24.7326	12.9512	13.7248	14.3365		200.2	103.5	118.1	196	133.2	124	47	272.1	123	61.9	159.7	68.41	177.3	169.6		6.96117	3.97982	3.64012	9.1879	12.6681	6.31101	3.43671	17.7809	10.2864	4.63213	6.45706	5.28213	12.9182	11.8299		200.2	103.5
GIPR	GIP	3.98515	1.66939	12.3544	3.06831	14.5981	20.6714	14.5048	4.84826	16.7578	4.99681	23.5199	23.2236	7	12.8989	7	54.47	181.5	200.9	122.1	266.7	133.2			17	587.8			68.23	27.79	132.7	13.6682	108.722	16.2614	39.7938	18.2695	6.44369			1.01446	117.635			9.74714	2.15445	18.9571	54.47	181.5	200.9
GLP1R	GLP-1	4.10639	8.59384	1.67239	4.4069	1.39906	15.3545	11.5597	10	12.7978	8.24874	7.07108	11.398	5.82587	14.3255	9.51662	60.28	45.84	18.7	90.96	173.1	25.07				459.6		88.68	557.3	659.4	928.1	14.6796	5.33406	11.1816	20.6404	123.726	1.63274				55.7176		7.78031	95.6595	46.0297	97.5242	60.28	45.84	18.7
GLP2R	GLP-2	13.8653	0.945962	19.5242	1.25398	6.82907	14.2699	4	6.61972	12.7811	6.22646	4.36767	6.95014	33.3751	16.7418	9.05215	63.31	108.4	46.94	144.6	195.7	47.17				246.8			605.9	229.6	695.5	4.56607	114.592	2.4042	115.313	28.6569	3.30555				39.6373			18.1542	13.7142	76.8325	63.31	108.4	46.94
GLR	Glucagon	9.46456	19.7467	8.60278	5.34997	13.1104	13.7348	4.94395	9	7.75491	12	11.3587	13.077	15.583	3.44308	20.9343	46.39	564.8	324.2	210.4	381.8	195.6	89.88	53.62	58.27	606.1		175.4	976.3	645.1	900.4	4.90144	28.6022	37.6855	39.3273	29.122	14.2412	18.1798	5.95778	7.51395	50.5083		13.4129	62.6517	187.361	43.0107	46.39	564.8	324.2
GNRHR	GnRH1	17.1854	18.3955	33.1033	16.1711	13.1472	18.7716	15.6877	14.5207	16.3025	9.74565	14.9122	17.0372	10.0225	13.3365	16.4536							282.5	390.8	189.2	264.7												18.0078	26.9133	11.6056	27.1608
GP183	GPR183	13.9805	3.35863	13.8257	0.853806	21.6711	22.1841	12.1563	17.692	9.88062	9.67642	3.89072	7.54028	19.265	4.86737	23.13		133.7	143.8	165.8	190.3	122.6				38.08	53.43		1115	502.3	572.8		39.8078	10.4009	194.189	8.78128	5.52647				3.93534	13.7327		57.8769	103.197	24.7644		133.7	143.8
GPBAR	GPBA	2.7794	13.2151	4.95665	15.6712	14.4688	1.99502	3.87863	6.25176	4.67648	8.3032	4.36387	3.41563	18.551	3.61665	12.4129	65.32															23.5014															65.32
GPR39	GPR39	10.6023	19.8797	6.04331	10.5777	8.11206	9.37683	6.57435	10.9712	13.0561	7.28914	7.76976	8.6359	15.7459	3.28163	5.9795		253.9	80.87	136.7	196.8		113.1	135.6	210	37.65		119.8		61.67	41.44		12.7718	13.3817	12.9234	24.2602		17.2032	12.3596	16.0844	5.16522		13.8723		18.7925	6.93035		253.9	80.87
GPR4	GPR4	12.5927	6.60388	1.52952	8.77353	13.3409	7.03499	5.32518	13.5551	11.4798	19.213	4.53666	4.61149	7.01011	5.59418	4.99562	44.24	117.1	82.51				152.1	164.5	61.28	110.7			41.38	173.3		3.51315	17.732	53.9452				28.5624	12.1357	5.33808	5.76173			5.9029	30.9786		44.24	117.1	82.51
GPR84	GPR84	10.4137	8.01662	15.8541	32.4419	33.8575	6.68954	9.24153	8.53136	14.8891	14.1035	4.62895	8.53015	25.5785	28.6893	7.70377		148.7	105.9	86.85		38.99									118.8		18.549	6.67967	2.6771		5.8285									15.421		148.7	105.9
GRM2	mGlu2	24.1555	6.27544	17.5982	19.4465	11.8383	7.14093	12.7367	7.48067	19.694	5.78561	27.212	7.38932	24.029	18.996	5.15821		418.9	158.5	92.82	83.71	53.4				659.2							66.7523	9.00662	4.77309	7.0711	7.47802				113.938							418.9	158.5
GRM4	mGlu4	12.8097	11.2419	13.8189	10.1588	7.66079	8.47297	8.98906	8.6815	10.2994	7.241	11.1855	28.1711	22.8247	7.31099	23.8889		93.19		67.57	140.1												8.28951		6.65138	18.2879												93.19
GRM5	mGlu5	2.36795	13.562	6.20722	7.21496	3.87455	11.4197	5.63371	9.30735	5.42171	20.3586	21.5728	24.266	14.9067	6.19483	20.3689		492.1	241.7	159	230.1	115.5	164	261	249	493.3				10			36.2852	38.9385	22.0376	59.3875	10.1141	29.1105	28.0423	45.9265	24.2306				1.61425			492.1	241.7
GRM6	mGlu6	22.2136	5.45516	6.09579	8.14788	4.02805	13.5485	13.528	7.66251	7.46785	18.1773	19.1375	22.5054	10.566	0.850229	7.43879		342.9	222.3	103	154.5	105.3											62.8579	36.4678	12.6413	38.356	7.77208											342.9	222.3
GRM8	mGlu8	12.9275	14.9485	15.6046	8.13472	12.5968	11.4858	6.62223	8.56674	2.87312	5.1866	21.4544	16.376	8.90251	7.11917	10.2519		426.5	195.7	70.87	84.72	128.4											28.5313	12.5412	8.71204	6.72553	11.179											426.5	195.7
HCAR2	HCA2	3.13639	7.69454	9.60374	15.3206	4.39736	3.40553	11.5868	5.59038	7.29078	6.21654	16.6131	15.2331	13.7551	8.56727	18.9796		147.8	125.3	139.6	173.1	142.4						123	99.57	167.6	322		19.2084	13.047	9.11189	39.3645	41.8144						8.07451	7.23877	19.5628	16.9656		147.8	125.3
HCAR3	HCA3	10.3047	18.284	20.4173	17.0202	10.3605	18.3528	13.6183	12.0652	15.2582	13.6563	4.0596	1.5257	21.521	20.7541	11.7408		415.3	190.3	187.4	317.1	177.7						97.92	605.4	115.2	487.1		22.7138	9.32051	11.0104	30.6067	9.68245						64.1803	28.1306	5.55071	41.4878		415.3	190.3
HRH1	H1	11.052	23.7503	9.42496	7.41332	11.6675	20.8184	13.8227	13.5943	15.4147	8.87297	23.5533	19.9533	15.8059	12.9533	7.94502	32.28	923	457.9	323.3	487.3	344.8	472.4	533.4	426.2	369.2	72.42	382.2	386.7	969.6	1017	2.92075	38.8626	48.5837	43.6107	41.7655	16.5623	34.1755	39.2369	27.649	41.6095	3.07473	19.1547	24.4656	74.8537	128.005	32.28	923	457.9
HRH2	H2	14.8352	19.1045	7.27811	0.57723	17.1179	6.52053	7.10964	4.41965	9.7453	13.9937	12.3191	14.3593	5.96786	23.5935	0.853806	51.79			18.49	46.36	80.08				689.3	76.54	196.4	458.4		422.2	3.49103			32.0323	2.70828	12.2812				49.258	6.21312	13.6775	76.8115		494.492	51.79
LPAR1	LPA1	19.5807	37.4171	16.6041	6.05005	11.2641	4.05162	10.8195	10.2143	11.1478	14.4313	5.99791	6.66337	3.02749	14.8006	20.1032		130		105.9			39.72	44.05	102	308.7		189.2	289.4	390.9	232		3.47435		17.504			3.67114	4.31256	9.14979	21.391		28.394	95.5906	26.4112	11.5405		130
LPAR2	LPA2	19.1142	2.21465	9.49876	1.73981	17.9808	7.96247	5.49756	11.3579	8.51063	5.55448	4.14633	4.70162	2.17571	12.7025	4.70898		313.1	344.6	203.6	246	45.48	299.7	405	334.7	490.7		76.77	715.2	498.6	938.9		141.377	36.2784	117.025	13.6812	5.71179	54.5151	35.6579	39.3273	88.3431		16.3284	328.72	39.2521	199.385		313.1	344.6
LT4R1	BLT1	18.5118	32.2445	19.0868	26.7168	26.9571	8.82887	15.6318	28.8285	26.1221	12.7719	22.1168	9.82107	19.3369	15.8438	24.3199		748.6	414.1	208.5	367	197	75.38	67.58	399.7	729.6	76.38	241.1	1380	1185	1474		23.2164	21.6957	7.80409	13.6142	22.3131	4.82222	2.34421	15.3012	57.1255	3.45348	24.5493	71.3662	74.7925	60.6088		748.6	414.1
LT4R2	BLT2	17.0975	24.8934	21.3529	22.3194	21.6611	8.05264	18.807	27.1125	22.3524	18.9206	31.8855	17.0603	25.3011	21.6973	19.9185		420.9	250.6	206.1	299.5	105.7								23.07	64.97		16.9081	11.7361	9.23414	13.8266	13.1261								1.06327	3.2618		420.9	250.6
MC3R	MC3	9.24934	26.0247	1.68309	17.9406	4.468	10.1612	12.7599	15.4096	13.3955	5.78124	4.87259	9.50291	10.1569	9.4297	2.54022	58.1				34.95	124.9				586.5	50.78	190.9	57.52	404.9	624.6	6.28153				7.82228	12.2918				101.449	10.4216	20.0886	5.66316	42.9388	245.884	58.1
MC4R	MC4	7.97249	0.850229	1.17965	22.3728	14.9803	8.93565	7.35481	6.09773	10.0203	8.90728	5.58743	7.94923	7.76131	1.81756	7.91791	36.19					13.96				683.8		71.57		45.57	76.44	4.53936					1.56228				76.7687		9.00338		25.0721	9.65407	36.19
MTR1A	MT1	10.9825	12.2488	16.4177	5.4736	5.64059	3.63404	14	5.74106	12.2517	7.79016	12.0956	12.0408	7.44323	13.8817	9.4502		226	119.9	91.94	103.4					705.9			78.64	183.2	157.5		18.4508	7.30309	16.797	18.3314					90.6143			10.5653	13.1972	16.6663		226	119.9
MTR1B	MT2	14.4257	9.92006	14.9527	11.176	7.98966	25.0946	10.0597	14.2219	11.4925	6.70271	9.44276	9.71731	4.29137	7.83112	10.5483		235.4	155.9	92.72	151.8					16.85			20.4		16.22		23.7297	10.4262	8.29634	18.9996					2.51391			4.75373		1.53769		235.4	155.9
NPFF1	NPFF1	10.3616	8.38255	6.77728	13.5473	9.27235	7.20218	14.0202	8.26553	3.24953	10.1362	8.32247	12.9315	2.14275	9.53918	20.7458		696	420.4	256.5	461.8	148.9				530	98.54	410.3	322.1	198.8	612.2		83.0297	62.0308	18.9336	49.804	20.6743				52.2878	11.8402	31.7287	150.321	20.8404	29.5096		696	420.4
NPFF2	NPFF2	4.01723	13.804	6.5124	7.08524	7.24092	10.3987	1.75563	5.82473	7.13874	5.27112	10.7714	10.1711	29.9481	13.3172	15.3642		222.4	103.9	112.5	204.4	128.9									35.6		16.1113	15.9542	15.8781	28.2284	12.3958									2.31707		222.4	103.9
VIPR1	VPAC1	6.02675	5.4367	11.5154	11.0171	4.261	14.2142	4.3841	6.95199	3.74362	5.97374	6.79659	10.0059	4.11917	6.13085	4.19237	48.1	189	95.8	56.34	162.8	88.32	260.4	153.8	46.04	610.7	41.57	323.2	1367	694.8	1060	7.98108	34.7638	8.31932	5.11385	38.207	6.2135	59.3964	22.1232	12.2983	102.231	6.1163	32.3011	331.863	113.329	252.84	48.1	189	95.8
NPY1R	Y1	8.58163	9.44718	8.42996	15.2888	6.2451	9.97924	7.17191	3.59207	9.75254	7.02346	6.62414	6.23445	19.2327	14.471	4.35833		299.9	186.6	82.86	192.6	156.4							21.3		42.09		31.7449	22.1353	5.41966	30.8402	15.6725							1.10749		9.65736		299.9	186.6
OGR1	GPR68	9.53968	17.6616	19.4662	4.01725	6.54802	13.3113	12.3941	11.0325	8.64586	9.72143	5.90617	4.36395	15.3697	15.289	15.0415	44.88	582	454.1	295.9	427.5		748.9	849.4	870.6	446.4	63.36	65.57	76.18	102.7	146.8	4.70456	32.9528	23.3276	73.6574	65.2869		60.4238	76.9908	100.696	45.9192	10.7278	15.0254	4.9565	6.71725	9.75969	44.88	582	454.1
OPRD	𝛅	8.33193	18.114	12.7126	0.866759	6.60667	8.98015	6.54632	20.8323	9.97864	20.965	16.7553	18.6055	16.9695	22.5672	10.5759		559.9	276.8	186.9	250.3	97.51			33.39	297.2		35	779.9	486.4	976.1		30.9098	21.7736	215.631	37.886	10.8584			3.34615	14.176		1.88117	45.9589	21.5534	92.2951		559.9	276.8
OPRK	𝜅	2.86631	4.95547	8.96259	20.5191	7.47127	6.95468	7.21344	14.5254	19.3609	4.88334	25.4887	18.0716	6.42335	16.7538	11.2884		696.6	299.5	223.9	297	32.72				175.6	31.22		211.4	168.4	232.8		140.572	33.4167	10.9118	39.7523	4.70474				35.959	1.22486		32.9112	10.0515	20.623		696.6	299.5
OPRM	μ	19.8176	2.07813	14.4285	14.2628	2.1789	4.83235	11.1664	14.5254	13.0397	17.4331	15.6389	12.714	5.99162	13.7875	12.9478		672.4	378.9	225.8	332.3	76.77				235.1			1008	372.8	1198		323.561	26.2605	15.8314	152.508	15.8867				13.4859			168.235	27.039	92.5251		672.4	378.9
OPRX	NOP	11.9975	13.5266	12.777	19.335	8.29131	3.18958	13.5681	10.2869	11.7348	9.50169	23.9942	13.6985	12.3421	10.8148	12.9877		639.6	267.7	213.3	310.4	240			161.7	733.9			147.5	69.84	238.1		47.2847	20.9518	11.0318	37.4368	75.2451			13.7795	77.2389			11.951	6.4578	18.3328		639.6	267.7
OX2R	OX2	11.3727	6.86853	1.74433	2.97008	15.1233	8.9768	2.19759	4.39043	2.93843	6.24507	4.98806	8.94101	8.86522	5.94416	5.98811		135.4	48.06	120	168.7	144.6	425.5	584.7	618	395.5	72.33	302.1	852.9	634.4	863.9		19.7131	27.5522	40.403	11.155	16.1082	193.621	133.176	210.316	63.33	14.5006	33.7881	96.2074	106.727	144.269		135.4	48.06
OXYR	OT	20.7188	16.2626	14.2853	23.6327	7.08469	4.88042	11.0802	10.9645	8.84691	8.32914	11.227	3.99996	15.9216	12.9348	8.26511							173.6	263.4	54.66	192			128.3	165.7	229.8							15.6676	24.0229	6.17843	23.0516			8.05823	12.8104	27.8036
P2RY2	P2Y2	9.98508	11.493	7.9594	21.2557	5.41312	8.71808	8.60063	5.38571	3.40083	6.9701	6.66777	7.65361	9.04539	12.1111	7.42511		59.2	25.91	85.71	54.52	91.78	29.19	26.14	26.73	197.7			184.7	345.5	94.68		5.15098	3.25527	4.03233	10.0718	10.5276	3.39394	4.85358	7.85985	28.364			20.4192	28.5276	12.7513		59.2	25.91
PAR1	PAR1	4.59255	8.40482	9.51116	8.07545	2.03136	4.61176	10.3818	8.65271	4.1999	9.94479	11.3795	6.01201	12.1933	2.90365	8.99055		573.7	176.7	73.03	221.2	144	237.6	381.6	405.3	332.5		193.4	445.5	439.4	469.5		68.2585	18.5782	9.04346	108.892	31.2245	22.8861	44.1018	96.5024	33.4346		32.169	36.5364	151.327	52.2215		573.7	176.7
PAR2	PAR2	10.9924	16.1673	6.24082	11.3353	5.63844	15.0418	6.2833	10.5441	9.50312	12.5636	3.86846	6.73029	13.8292	0.205256	26.2422		620.6	326.2	217.1	319.7	187.6	303.5	483.3	418.7	497.8	41.49	235.1	861.2	766.2	489		38.3861	52.2688	19.1526	56.7	12.4719	48.3027	45.8361	44.0592	39.6223	10.7252	34.9316	62.274	3732.9	18.6341		620.6	326.2
PE2R1	EP1	12.9935	25.4304	7.83888	13.4739	15.6927	3.8815	13.7837	15.5615	14.2306	11.1377	22.3117	18.8728	11.4557	10.6796	20.3864		55.86	30.29	43.18	49.13		239.7	324.2	157.4	805.3	81.19	61.79		33.25			2.19658	3.86407	3.20471	3.13076		17.3901	20.8335	11.0606	72.3037	3.6389	3.27403		3.11341			55.86	30.29
PE2R2	EP2	7.45001	23.0664	21.4044	17.9456	6.17631	8.07727	6.2685	14.3166	15.341	12.2482	6.50007	9.38884	22.188	14.5624	19.7811	46.63					30.19				93.46	47.04		107.8	59.47	100.5	6.25905					3.73765				7.6305	7.23685		4.85848	4.08382	5.08061	46.63
PE2R3	EP3	13.8272	9.52642	13.5927	31.0929	15.181	15.5485	7.07927	13.4079	12.2482	18.26	33.8298	9.60536	23.9566	8.61665	10.1411		493.8	275.8	236.2	305.9	95.17			21.58	583.8		379.9					51.8348	20.2903	7.5966	20.1502	6.12085			1.76189	31.9714		39.5508					493.8	275.8
PE2R4	EP4	1.55178	25.3734	9.51229	1.24209	1.5575	6.3143	9.30644	11.9294	18.4249	16.0229	26.7554	15.2948	7.74526	11.4647	16.0055	47.12	513.1	246.7		61.21	88.63				687	75.63	96.65	251.5	400.6	146.8	30.3651	20.2219	25.9349		39.3001	14.0364				42.876	2.82672	6.31912	32.4715	34.9421	9.17183	47.12	513.1	246.7
PF2R	FP	9.60473	23.8596	15.3275	33.0288	10.511	16.1408	12.739	13.2054	12.8156	12.1817	17.9638	0.858529	15.381	9.6298	10.5445		28.89		84.82	114.5	122.5	306.1	459.1	577.5	437	103.9	183.3					1.21083		2.56806	10.8934	7.58945	24.0286	34.7661	45.0621	35.8734	5.78385	213.505
PSYR	GPR65	9.44826	14.508	23.8778	21.4863	5.41316	8.4076	22.437	14.0939	16.08	12.6211	10.6854	4.80391	22.5902	3.69024	22.7453	32.3				86.79							117.1	57.62	68.83		3.41862				16.0331							24.376	2.55067	18.6519		32.3
PTH1R	PTH1	6.6364	7.25839	10.4332	8.70277	6.13373	1.85956	5.04729	1.59656	8.86791	11.4904	4.71206	19.6296	12.4784	13.2665	11.6824	39.3	313	148.1	134.1	300.5	141.2	324.4	132.8	104	613.8	56.68	357.7	2713	921.9	1585	5.92188	43.1225	14.195	15.4089	48.9914	75.9318	64.2721	83.179	11.7277	53.4187	12.0287	18.2225	217.416	69.4909	135.674	39.3	313	148.1
S1PR1	S1P1	4.33603	11.6294	9.36056	4.63677	6.82839	3.33624	6.18828	3.33173	3.54649	3.79102	3.7747	6.36402	2.65751	2.95507	9.9613		131.7	99.81	68.45	59.24					375.1	91.98	175.2	477	227.4	557.1		11.3247	10.6628	14.7624	8.67554					98.9445	24.3675	27.5298	179.492	76.9524	55.9264		131.7	99.81
SSR2	SST2	7.87264	10.0953	7.78334	5.54848	6.32991	6.94066	9.25828	8.74498	4.23778	5.1299	13.5204	24.7578	2.49861	7.31286	16.1495		880.1	322.6	265.8	449.4	233.5	130.9		486.3	636.7	47.84		2867	1431	1820		87.1791	41.4475	47.905	70.9963	33.6423	14.1387		114.753	124.115	3.53837		1147.44	195.683	112.697		880.1	322.6
V1AR	V1A	9.60574	2.92884	8.14348	6.05072	3.93506	1.04791	8.55104	4.11778	6.10858	5.67437	17.8676	12.702	9.08825	3.8339	5.67849		97.88	58.26	57.07	52.44	92.98	615.6	817.5	831.8	851.3			890.1	680.3	934.7		33.4193	7.15419	9.43193	13.3263	88.7287	71.9912	198.529	136.169	150.025			97.9397	177.443	164.604		97.88	58.26
V2R	V2	5.58038	17.3651	11.0066	7.75112	12.4461	7.81531	2.56837	3.74705	7.55896	9.61808	8.65611	8.32429	5.60472	16.5876	4.10109	42.78	31	20	10			122.3	208.6	73.54	767.6		161.1	353.3	705.2	334.2	7.66614	1.78519	1.81709	1.29014			47.6177	55.6705	9.72885	79.8081		19.353	63.0361	42.5136	81.4906	42.78	31	20
NPY5R	Y5	3.46528	1.24967	8.95153	9.99949	8.08122	4.8135	9.30499	5.12772	2.40624	6.27778	4.12473	6.12658	13.1449	13.5264	8.06922				58.16	55.68	32.3													5.8163	6.89005	6.7103
[truncated: 62 more columns]

## Sheet: I-EmEC
UniProt	IUPHAR	I-Basal SD Gs	I-Basal SD Golf	I-Basal SD Gi1	I-Basal SD Gi2	I-Basal SD Gi3	I-Basal SD GoA	I-Basal SD GoB	I-Basal SD Gz	I-Basal SD Gq	I-Basal SD G11	I-Basal SD G14	I-Basal SD G15	I-Basal SD G12	I-Basal SD G13	I-Emax Gs	I-Emax Golf	I-Emax Gi1	I-Emax Gi2	I-Emax Gi3	I-Emax GoA	I-Emax GoB	I-Emax Gz	I-Emax Gq	I-Emax G11	I-Emax G14	I-Emax G15	I-Emax G12	I-Emax G13	#SDs Gs	#SDs Golf	#SDs Gi1	#SDs Gi2	#SDs Gi3	#SDs GoA	#SDs GoB	#SDs Gz	#SDs Gq	#SDs G11	#SDs G14	#SDs G15	#SDs G12	#SDs G13	I-Emax >1.4SD Gs	I-Emax >1.4SD Golf	I-Emax >1.4SD Gi1	I-Emax >1.4SD Gi2	I-Emax >1.4SD Gi3	I-Emax >1.4SD GoA
5HT1A	5-HT1A	6.18	5.13	3.01	3.01	4.25	7.11	7.11	3.62	3.99	3.99	3.58	4.91	3.55	3.43	12.9	10.8	24.2	24.2	19.9	24.2	24.2	13	21.2	21.2	19.6	14.9	14.5	11.6	2.08738	2.10526	8.03987	8.03987	4.68235	3.40366	3.40366	3.59116	5.31328	5.31328	5.47486	3.03462	4.08451	3.38192	12.9	10.8	24.2	24.2	19.9	24.2
5HT1B	5-HT1B	4	3.34	2.18	2.18	2.97	1.51	1.51	1.63	2.79	2.79	1.82	4.66	0.3	2.65			14.3	14.3	13.4	11.3	11.3	10.4	6.3	6.3	11.9		5.8				6.55963	6.55963	4.51178	7.48344	7.48344	6.38037	2.25806	2.25806	6.53846		19.3333				14.3	14.3	13.4	11.3
5HT1D	5-HT1D	5.92	4.18	5.14	5.14	6.81	4.32	4.32	6.84	6.77	6.77	5.84	5.57	4.54	5.21			14	14	9.4	18.7	18.7	12.5	9.2	9.2	16.2	2	3.4	6.9			2.72374	2.72374	1.38032	4.3287	4.3287	1.82749	1.35894	1.35894	2.77397	0.359066	0.748899	1.32438			14	14	9.4	18.7
5HT1E	5-HT1E	1.1	1.86	1.71	1.71	0.98	0.83	0.83	2.1	0.45	0.45	2.42	2.89	2.52	2.06			9.7	9.7	12.9	8.4	8.4	6.4									5.67251	5.67251	13.1633	10.1205	10.1205	3.04762									9.7	9.7	12.9	8.4
5HT1F	5-HT1F	2.5	0.91	4.45	4.45	4.79	5.37	5.37	4.11	2.33	2.33	4.34	0.84	0.29	2.11			9.4	9.4	14.5	3.3	3.3										2.11236	2.11236	3.02714	0.614525	0.614525										9.4	9.4	14.5
5HT2A	5-HT2A	0.81	1.11	2.5	2.5	4.88	2.76	2.76	4.09	4.91	4.91	3.63	1.02	2.56	2.25	12.7	13.4	17.7	17.7	12.2	21.2	21.2	13.8	10	10	10	22.2	20	19.9	15.679	12.0721	7.08	7.08	2.5	7.68116	7.68116	3.37408	2.03666	2.03666	2.75482	21.7647	7.8125	8.84444	12.7	13.4	17.7	17.7	12.2	21.2
5HT2B	5-HT2B	0.61	2.61	1.22	1.22	1.63	0.6	0.6	0.94	1.69	1.69	0.47	1.23	2.35	1.15	5.8	2.8	12.2	12.2	14.5	11.4	11.4	12.4	11.3	11.3	11.6	3.5	2	4.2	9.5082	1.0728	10	10	8.89571	19	19	13.1915	6.68639	6.68639	24.6809	2.84553	0.851064	3.65217	5.8		12.2	12.2	14.5	11.4
5HT2C	5-HT2C	1.18	1.18	1.97	1.97	3.17	1.48	1.48	1.84	1.78	1.78	2.03	1.96	1.28	1.45	17.7	15.8	7.3	7.3	4.2	11.5	11.5	5.5	5.3	5.3	4.5	18.6	18.2	19	15	13.3898	3.70558	3.70558	1.32492	7.77027	7.77027	2.98913	2.97753	2.97753	2.21675	9.4898	14.2188	13.1034	17.7	15.8	7.3	7.3		11.5
5HT4R	5-HT4	2.51	2	1.7	1.7	2.54	1.85	1.85	1.99	1.6	1.6	1.06	2.93	1.19	1.48	24.3	23.4	21.6	21.6	19.2	20.7	20.7	13	19.5	19.5	17.3	16.6	19.4	16.8	9.68127	11.7	12.7059	12.7059	7.55906	11.1892	11.1892	6.53266	12.1875	12.1875	16.3208	5.66553	16.3025	11.3514	24.3	23.4	21.6	21.6	19.2	20.7
5HT6R	5-HT6	3.13	2.77	5.24	5.24	5.68	5.08	5.08	3.22	9.17	9.17	6.98	5.51	4.55	4.58	22.6	23.7						13.9	7.2	7.2	9		4.8	18.5	7.22045	8.55596						4.31677	0.785169	0.785169	1.2894		1.05495	4.0393	22.6	23.7
5HT7R	5-HT7	2.01	1.94	1.67	1.67	1.09	2.29	2.29	3.49	5.31	5.31	2.04	1.87	2	2.35	19	17.2	6.4	6.4	8	10.2	10.2	8.3	12.4	12.4	14	7.3	7.6	11.5	9.45274	8.86598	3.83234	3.83234	7.33945	4.45415	4.45415	2.37822	2.33522	2.33522	6.86275	3.90374	3.8	4.89362	19	17.2	6.4	6.4	8	10.2
AA1R	A1	5.6	5.14	9.93	9.93	7.01	10.85	10.85	7.89	11.38	11.38	9.23	4.86	3.42	3.99	13.6	8.9	6.1	6.1	4.7	16.9	16.9	16.4	18.7	18.7	22.5	27.1	23.1		2.42857	1.73152	0.6143	0.6143	0.670471	1.5576	1.5576	2.07858	1.64323	1.64323	2.4377	5.57613	6.75439		13.6	8.9				16.9
AA2AR	A2A	2.72	1.91	0.82	0.82	2.27	1.41	1.41	1.98	4.62	4.62	3.25	4.36	3.01	4.65	14	9.2	9.2	9.2	7.7	12.6	12.6	9.4	7.1	7.1	6.4				5.14706	4.81675	11.2195	11.2195	3.39207	8.93617	8.93617	4.74747	1.5368	1.5368	1.96923				14	9.2	9.2	9.2	7.7	12.6
AA2BR	A2B	8.36	8.84	5.66	5.66	5.86	4.6	4.6	4.54	8.03	8.03	9.13	5.21	5.99	6.38	34.5	30.8	30.8	30.8	31.1	33.2	33.2	20.6	22.5	22.5	27.4	5	15.9	20.8	4.12679	3.48416	5.4417	5.4417	5.30717	7.21739	7.21739	4.53744	2.80199	2.80199	3.0011	0.959693	2.65442	3.26019	34.5	30.8	30.8	30.8	31.1	33.2
AA3R	A3	1.57	3.07	2.94	2.94	3.15	2.12	2.12	1.51	4.14	4.14	7.75	2.76	0.71	0.9			31.1	31.1	28.3	16.1	16.1	5									10.5782	10.5782	8.98413	7.59434	7.59434	3.31126									31.1	31.1	28.3	16.1
ACM1	M1	7.89	7.02	9.27	9.27	9.56	7.81	7.81	7.99	10.19	10.19	10.11	9.53	9.25	8.6	52.6	49.2	46.2	46.2	39.7	43.6	43.6	29.9	38.7	38.7	34.6	47.3	43.9	34.8	6.66667	7.00855	4.98382	4.98382	4.15272	5.58259	5.58259	3.74218	3.79784	3.79784	3.42235	4.96327	4.74595	4.04651	52.6	49.2	46.2	46.2	39.7	43.6
ACM2	M2	8.27	12.16	10.7	10.7	10.85	9.01	9.01	11.9	9.42	9.42	13.13	8.36	10.05	11.36	25.2	21.3	43.8	43.8	35.7	39.3	39.3	26.3	36.9	36.9	33.4	26.4	21.9	15.8	3.04716	1.75164	4.09346	4.09346	3.29032	4.36182	4.36182	2.21008	3.9172	3.9172	2.54379	3.15789	2.1791	1.39085	25.2	21.3	43.8	43.8	35.7	39.3
ACM3	M3	2.76	2.35	3.91	3.91	3.41	3.47	3.47	4.5	2.99	2.99	3.62	3.41	1.98	4.49	47.6	47.7	43.2	43.2	33.3	42.3	42.3	29.9	28.5	28.5	29.1	44.3	44.7	40.2	17.2464	20.2979	11.0486	11.0486	9.7654	12.1902	12.1902	6.64444	9.53177	9.53177	8.03867	12.9912	22.5758	8.95323	47.6	47.7	43.2	43.2	33.3	42.3
ACM4	M4	4.24	7.19	4.34	4.34	3.98	5.23	5.23	3.8	11.33	11.33	10.24	4.88	5.08	5.19	22.4	9.4	35.3	35.3	33.1	37.6	37.6	22.2	29.1	29.1	27.4	25.4	16.9	12.1	5.28302	1.30737	8.13364	8.13364	8.31658	7.18929	7.18929	5.84211	2.5684	2.5684	2.67578	5.20492	3.32677	2.33141	22.4		35.3	35.3	33.1	37.6
ACM5	M5	3.18	3.46	3.7	3.7	6.37	2.79	2.79	4.36	5.33	5.33	4.33	3.66	4.43	4.33	48.5	51.3	36	36	24.3	43.4	43.4	30.9	27.9	27.9	25.2	43.7	47.2	45.6	15.2516	14.8266	9.72973	9.72973	3.81476	15.5556	15.5556	7.08716	5.23452	5.23452	5.81986	11.9399	10.6546	10.5312	48.5	51.3	36	36	24.3	43.4
ADA1A	α1A	5.07	4.23	3.47	3.47	3.8	4.05	4.05	2.86	6.74	6.74	5.82	4.85	5.23	4.62	37	37.8	42.1	42.1	40.5	38.6	38.6	27.1	34.9	34.9	30.3	41.3	39.7	41.1	7.29783	8.93617	12.1326	12.1326	10.6579	9.53086	9.53086	9.47552	5.17804	5.17804	5.20619	8.51546	7.59082	8.8961	37	37.8	42.1	42.1	40.5	38.6
ADA1B	α1B	3.72	4.28	4.98	4.98	6.67	5.22	5.22	7.62	9.1	9.1	8.75	5.44	6.25	8.42	46.3	45.5	23	23	17.1	17.7	17.7	16.4	40.9	40.9	38.7	25.8	10.1	25.8	12.4462	10.6308	4.61847	4.61847	2.56372	3.3908	3.3908	2.15223	4.49451	4.49451	4.42286	4.74265	1.616	3.06413	46.3	45.5	23	23	17.1	17.7
ADA1D	α1D	2.31	3.27	3.76	3.76	3.86	3.07	3.07	2.81	4.77	4.77	5.36	3.39	2.63	2.99	21.7	15.7							14.9	14.9	20.3				9.39394	4.80122							3.12369	3.12369	3.78731				21.7	15.7
ADA2A	α2A	8.57	8.16	6.95	6.95	5.2	5.8	5.8	4.02	6.93	6.93	8.47	5.64	6.71	5.66	21.8	18.5	41.4	41.4	38.4	39.1	39.1	29.1	32.5	32.5	28.8	41.2	40.2	38.5	2.54376	2.26716	5.95683	5.95683	7.38462	6.74138	6.74138	7.23881	4.68975	4.68975	3.40024	7.30496	5.99106	6.80212	21.8	18.5	41.4	41.4	38.4	39.1
ADA2B	α2B	6.04	8.52	7.28	7.28	7.07	3.56	3.56	5.3	6.16	6.16	8.06	9.43	9.38	6.72	27.7	19.8	37.8	37.8	32.3	36.7	36.7	24.2	26.3	26.3	28.6	24.4	37.9	33.7	4.58609	2.32394	5.19231	5.19231	4.5686	10.309	10.309	4.56604	4.26948	4.26948	3.54839	2.58749	4.04051	5.01488	27.7	19.8	37.8	37.8	32.3	36.7
ADA2C	α2C	3.87	3.06	4.72	4.72	4.02	2.65	2.65	5.68	7.49	7.49	6.14	7.34	7.95	7.74			28.5	28.5	29	19.8	19.8	26.8	5.1	5.1	10.8						6.03814	6.03814	7.21393	7.4717	7.4717	4.71831	0.680908	0.680908	1.75896						28.5	28.5	29	19.8
ADRB1	β1	4.02	4.74	3.26	3.26	3.15	2.64	2.64	1.18	4.4	4.4	2.2	3.69	3.86	4.48	37.7	34.9	14.2	14.2	13.8	10.6	10.6	5.4	25.3	25.3	31.6			6.2	9.37811	7.36287	4.35583	4.35583	4.38095	4.01515	4.01515	4.57627	5.75	5.75	14.3636			1.38393	37.7	34.9	14.2	14.2	13.8	10.6
ADRB2	β2	3.56	1.91	4.52	4.52	4.78	3.8	3.8	3.39	7.54	7.54	6.78	3.27	2.51	2.73	18.3	14.7							9.3	9.3	15				5.14045	7.69634							1.23342	1.23342	2.21239				18.3	14.7
ADRB3	β3	2.93	3.21	3.92	3.92	4.18	2.68	2.68	2.9	3.53	3.53	4.47	3.04	3.25	3.61	23.8	23.5													8.12287	7.32087													23.8	23.5
AGTR1	AT1	2.28	3.59	3.41	3.41	0.66	2.94	2.94	3.56	2.45	2.45	2.43	2.94	1.33	1.18	27.9	26.7	38.9	38.9	34.2	24.2	24.2	8.6	32.6	32.6	32.4	39.4	36.5	29.9	12.2368	7.43733	11.4076	11.4076	51.8182	8.23129	8.23129	2.41573	13.3061	13.3061	13.3333	13.4014	27.4436	25.339	27.9	26.7	38.9	38.9	34.2	24.2
APJ	APLNR	3.3	0.91	1.33	1.33	2.94	1.54	1.54	4.07	4.42	4.42	4.63	2.05	1.31	2.75			32.4	32.4	28.9	15.3	15.3	6.8	8	8	5.2		6.5				24.3609	24.3609	9.82993	9.93506	9.93506	1.67076	1.80995	1.80995	1.12311		4.96183				32.4	32.4	28.9	15.3
BKRB1	B1	6.91	5.52	7.12	7.12	8.44	7.32	7.32	2.91	6.59	6.59	4.91	4.3	5.52	7.15	20.4	20.3	19.9	19.9	13.7	23.2	23.2	10.8	8.3	8.3	8	19.8	19.7	21.7	2.95224	3.67754	2.79494	2.79494	1.62322	3.1694	3.1694	3.71134	1.25948	1.25948	1.62933	4.60465	3.56884	3.03497	20.4	20.3	19.9	19.9	13.7	23.2
BKRB2	B2	4.02	4.89	4.94	4.94	4.97	4.76	4.76	2.75	4.8	4.8	4.74	2.9	2.44	3.12	30.9	25.8	40.2	40.2	29.9	38.3	38.3	24.7	30.8	30.8	29.4	42.3	40.6	38.6	7.68657	5.27607	8.13765	8.13765	6.0161	8.04622	8.04622	8.98182	6.41667	6.41667	6.20253	14.5862	16.6393	12.3718	30.9	25.8	40.2	40.2	29.9	38.3
CCKAR	CCK1	3.84	4.43	2.63	2.63	4.72	2.93	2.93	3.32	5.39	5.39	7.02	3.04	9.75	10.6	54.4	53.8	51.7	51.7	46.9	48.3	48.3	34	47.2	47.2	44.5	50.5	52.5	47.9	14.1667	12.1445	19.6578	19.6578	9.93644	16.4846	16.4846	10.241	8.75696	8.75696	6.33903	16.6118	5.38462	4.51887	54.4	53.8	51.7	51.7	46.9	48.3
CLTR1	CysLT1	5.75	6.14	5.37	5.37	7.92	5.62	5.62	4.84	10.53	10.53	10.12	4.14	3.5	2.77	21.2	15.5	27.8	27.8	30.9	15.8	15.8	7	35.5	35.5	27.9	28.2	5	2.3	3.68696	2.52443	5.17691	5.17691	3.90152	2.81139	2.81139	1.44628	3.37132	3.37132	2.75692	6.81159	1.42857	0.830325	21.2	15.5	27.8	27.8	30.9	15.8
CLTR2	CysLT2	2.95	2.49	3.34	3.34	3.86	2.65	2.65	2.08	4.99	4.99	4.82	2.24	2.19	3.99			21.9	21.9	32.5	19.4	19.4	18.1	35.6	35.6	29	19.9	8.1	15.8			6.55689	6.55689	8.41969	7.32075	7.32075	8.70192	7.13427	7.13427	6.0166	8.88393	3.69863	3.9599			21.9	21.9	32.5	19.4
CNR1	CB1	1.46	1.59	7.35	7.35	7.85	6.79	6.79	7.44	4.24	4.24	3.66	1.8	2.14	3.05			11.2	11.2	7.7	10.6	10.6	6.9			8.1		11.5	10.2			1.52381	1.52381	0.980892	1.56112	1.56112	0.927419			2.21311		5.37383	3.34426			11.2	11.2		10.6
CNR2	CB2	3.14	1.74	6.66	6.66	7.24	2.27	2.27	1.9	5.15	5.15	5.65	1.43	2.31	3.97			16.2	16.2	14	14.5	14.5	7.5			4.1						2.43243	2.43243	1.9337	6.38767	6.38767	3.94737			0.725664						16.2	16.2	14	14.5
DRD1	D1	2.97	3.49	2.97	2.97	4.19	5.19	5.19	4.47	4.8	4.8	4.79	4.23	4.14	4.19	26.3	25.6			12.9			11.2	21.6	21.6	18.9				8.85522	7.33524			3.07876			2.50559	4.5	4.5	3.94572				26.3	25.6			12.9
DRD2	D2			0.35	0.35	1.92	1.78	1.78	3.25									33.3	33.3	30.2	31.7	31.7	20.5									95.1429	95.1429	15.7292	17.809	17.809	6.30769									33.3	33.3	30.2	31.7
DRD3	D3	5.15	5.77	3.59	3.59	5.3	2.68	2.68	3.43	6.56	6.56	3.13	4.12	4.6	4.25			9.3	9.3	17.3	9.9	9.9	12.4									2.59053	2.59053	3.26415	3.69403	3.69403	3.61516									9.3	9.3	17.3	9.9
DRD4	D4			4.71	4.71	0.26	0.04	0.04	1.22									34.9	34.9	31.7	30.4	30.4	24.5									7.40977	7.40977	121.923	760	760	20.082									34.9	34.9	31.7	30.4
DRD5	D5	4.09	3.32	4.13	4.13	3.68	3.59	3.59	3.02	3.08	3.08	4.71	3.94	4.07	4.7	17.7	14.3	8.8	8.8	11.4	10.7	10.7	9.5	11.9	11.9	14.7		4.5	6.3	4.32763	4.30723	2.13075	2.13075	3.09783	2.9805	2.9805	3.1457	3.86364	3.86364	3.12102		1.10565	1.34043	17.7	14.3	8.8	8.8	11.4	10.7
EDNRA	ETA	3.82	4.65	3.83	3.83	3.61	3.93	3.93	3.22	7.69	7.69	6.65	3.14	3.03	4.33	48	46.5	47.6	47.6	45.3	46.3	46.3	34.5	41.4	41.4	42.6	48.9	50.1	47.9	12.5654	10	12.4282	12.4282	12.5485	11.7812	11.7812	10.7143	5.38362	5.38362	6.40602	15.5732	16.5347	11.0624	48	46.5	47.6	47.6	45.3	46.3
EDNRB	ETB	6.9	7.06	8.53	8.53	9.43	7.37	7.37	8.15	4.76	4.76	9.2	5.83	6.25	6.16	36.8	32.6	42.4	42.4	38	38.3	38.3	30.8	29.7	29.7	29.9	42.1	43.7	40	5.33333	4.61756	4.97069	4.97069	4.02969	5.19674	5.19674	3.77914	6.2395	6.2395	3.25	7.22127	6.992	6.49351	36.8	32.6	42.4	42.4	38	38.3
FFAR1	FFA1	2.27	2.28	4.62	4.62	5.22	2.53	2.53	1.07	8.22	8.22	5.88	2.11	1.53	1.28	26.8	27.2	5.6	5.6		16.2	16.2	9.1	11	11		9.5	12.7	7.9	11.8062	11.9298	1.21212	1.21212		6.40316	6.40316	8.50467	1.3382	1.3382		4.50237	8.30065	6.17188	26.8	27.2				16.2
FFAR2	FFA2	2.26	2.6	2.94	2.94	3.43	3.63	3.63	4.08	4.04	4.04	3.13	4.03	4.36	4.33	16.5	16.6				14.1	14.1	10	8	8		14.7	5.5	6.4	7.30088	6.38462				3.8843	3.8843	2.45098	1.9802	1.9802		3.64764	1.26147	1.47806	16.5	16.6				14.1
FFAR3	FFA3	3.06	1.61	2.32	2.32	3.03	5	5	6.16	6.03	6.03	4.56	1.99	2.26	4.18			25.3	25.3	24.5	25.5	25.5	18.9	5.7	5.7	9.2	15	30.4	25.9			10.9052	10.9052	8.08581	5.1	5.1	3.06818	0.945274	0.945274	2.01754	7.53769	13.4513	6.19617			25.3	25.3	24.5	25.5
FFAR4	FFA4	6.07	4.8	4.59	4.59	4.67	6.41	6.41	5.88	6.57	6.57	3.21	5.03	4.05	4.5	20.8	22.3	15.2	15.2	10.2	21.8	21.8	10.7	20.6	20.6	10.8	19.5	24.2	23	3.42669	4.64583	3.31155	3.31155	2.18415	3.40094	3.40094	1.81973	3.13546	3.13546	3.36449	3.87674	5.97531	5.11111	20.8	22.3	15.2	15.2	10.2	21.8
FPR1	FPR1	4.38	3.93	5.3	5.3	7.12	5.86	5.86	4.68	7.15	7.15	5.72	4.28	3.86	3.78			7.2	7.2	15.8						8.3						1.35849	1.35849	2.2191						1.45105						7.2	7.2	15.8
FPR2	FPR2/ALX	2.99	3.09	2.41	2.41	4.82	2.41	2.41	4.19	6.53	6.53	5.22	1.86	0.69	1.52	3.3	3.6	23.3	23.3	36.7	20.6	20.6	8.8	10.8	10.8	35.1	4.5	5.7	7	1.10368	1.16505	9.66805	9.66805	7.61411	8.54772	8.54772	2.10024	1.65391	1.65391	6.72414	2.41935	8.26087	4.60526			23.3	23.3	36.7	20.6
GALR1	GAL1	0.93	0.64	0.74	0.74	0.87	1.99	1.99	1.51	1.5	1.5	2.91	2.24	0.5	2.02	9.7	6.7	41.8	41.8	35.7	25	25	12.7	20.2	20.2	19.4	10.1	12.9	10.6	10.4301	10.4688	56.4865	56.4865	41.0345	12.5628	12.5628	8.4106	13.4667	13.4667	6.66667	4.50893	25.8	5.24752	9.7	6.7	41.8	41.8	35.7	25
GALR2	GAL2	5.77	4.08	4.4	4.4	3.12	4.38	4.38	5.77	4.86	4.86	4.13	4.28	2.97	4.23			21.7	21.7	24.8	15.3	15.3	6.3	25.1	25.1	23.1	19.7	27.4	18.7			4.93182	4.93182	7.94872	3.49315	3.49315	1.09185	5.16461	5.16461	5.59322	4.6028	9.22559	4.4208			21.7	21.7	24.8	15.3
GALR3	GAL3	4.12	3.35	3.08	3.08	7.09	4.08	4.08	3.5	6.31	6.31	6.49	2.7	3.65	4.07			7.5	7.5	14.7	9.4	9.4	9.6			4.8						2.43506	2.43506	2.07334	2.30392	2.30392	2.74286			0.739599						7.5	7.5	14.7	9.4
GASR	CCK2	3.29	2.96	3.14	3.14	3.24	2.92	2.92	2.2	5.37	5.37	6.75	2.96	0.92	2.25	39.3	39.3	40.6	40.6	36.9	31.8	31.8	18.2	34.6	34.6	28	32.4	39	35.3	11.9453	13.277	12.9299	12.9299	11.3889	10.8904	10.8904	8.27273	6.4432	6.4432	4.14815	10.9459	42.3913	15.6889	39.3	39.3	40.6	40.6	36.9	31.8
GHSR	Ghrelin	2.42	3.63	3.03	3.03	3.37	3.19	3.19	4.16	2.05	2.05	4.77	2.35	2.07	3.03	24	18.2	9.6	9.6	10.7	22.4	22.4	18.5	5.4	5.4	20.3	29.6	24.1	21.1	9.91736	5.01377	3.16832	3.16832	3.17507	7.02194	7.02194	4.44712	2.63415	2.63415	4.25577	12.5957	11.6425	6.9637	24	18.2	9.6	9.6	10.7	22.4
GIPR	GIP	6.77	4.97	6.55	6.55	6.79	7.54	7.54	5.26	8.32	8.32	8.25	5.97	5.68	6.07	31.5	30.8													4.65288	6.19718													31.5	30.8
GNRHR	GnRH1	4.34	2.53	4.27	4.27	4.07	5.28	5.28	6.17	7.75	7.75	6.26	4.68	2.44	4.4	30.4	29.4	18.8	18.8	25.4	10.6	10.6	12.6	28.2	28.2	26.3				7.00461	11.6206	4.40281	4.40281	6.24079	2.00758	2.00758	2.04214	3.63871	3.63871	4.20128				30.4	29.4	18.8	18.8	25.4	10.6
GP119	GPR119	3.93	2.88	3.56	3.56	3.59	3.48	3.48	2.67	4.44	4.44	3.53	2.27	3.32	4.42	19.8	19.5	8.8	8.8	10.9	14.1	14.1	13.2	16.2	16.2	14.8	7.5	6.9	6.1	5.03817	6.77083	2.47191	2.47191	3.03621	4.05172	4.05172	4.94382	3.64865	3.64865	4.19263	3.30396	2.07831	1.38009	19.8	19.5	8.8	8.8	10.9	14.1
GP132	GPR132	5.2	4.72	7.96	7.96	7.36	9.27	9.27	8.09	8.78	8.78	10.49	10.64	8.05	7.93	25.1	35.5							17.7	17.7	11.2				4.82692	7.52119							2.01595	2.01595	1.06768				25.1	35.5
GP174	GPR174	3.02	2.73	2.61	2.61	2.68	1.97	1.97	2.71	5.34	5.34	3.91	3.32	3.79	4.3	10.9	9.5												14	3.60927	3.47985												3.25581	10.9	9.5
GP183	GPR183	3.66	2.98	2.64	2.64	1.53	1.89	1.89	3.23	3.49	3.49	3.75	5.56	1.89	1.94			17.8	17.8	10.1	16.5	16.5	6.8	3.1	3.1	3.9	5.3	8.6				6.74242	6.74242	6.60131	8.73016	8.73016	2.10526	0.888252	0.888252	1.04	0.953237	4.55026				17.8	17.8	10.1	16.5
GPR17	GPR17	3.87	3.64	8.75	8.75	10.41	4.91	4.91	6.86	12.11	12.11	8.91	5.07	4.59	5.33			31.2	31.2	20.9	37.1	37.1	17.5	31.1	31.1	20.7		37.7	30.3			3.56571	3.56571	2.00768	7.55601	7.55601	2.55102	2.56813	2.56813	2.32323		8.21351	5.6848			31.2	31.2	20.9	37.1
GPR34	GPR34	2.49	1.87	3.8	3.8	3.43	2.59	2.59	2.04	2.02	2.02	2.96	1.64	1.17	1.31			15.5	15.5	16.5	19.4	19.4										4.07895	4.07895	4.8105	7.49035	7.49035										15.5	15.5	16.5	19.4
GPR35	GPR35	2.9	2.19	7.36	7.36	9.2	7.55	7.55	5.31	6.67	6.67	6.72	3.01	6.45	4.8			24.1	24.1	17.3	23.1	23.1	13					15.7	11.1			3.27446	3.27446	1.88043	3.0596	3.0596	2.44821					2.43411	2.3125			24.1	24.1	17.3	23.1
GPR55	GPR55	6.44	6.04	8.83	8.83	8.55	8.14	8.14	7.26	10.19	10.19	6.16	8.61	6.65	8.96														35.4														3.95089
GPR84	GPR84	4.1	2.87	5.1	5.1	4.31	5.76	5.76	6.24	8.82	8.82	8.26	6.72	3.17	4.88			25.2	25.2	33.7	26.9	26.9	17.5									4.94118	4.94118	7.81903	4.67014	4.67014	2.80449									25.2	25.2	33.7	26.9
GRPR	BB2	6.65	6.38	10.05	10.05	8.76	6.47	6.47	8.19	12.09	12.09	12.73	8.3	6.8	6.22	42.4	41.7	35.5	35.5	37.6	36.6	36.6	25.7	38.2	38.2	36.2	20.3	43	42.1	6.37594	6.53605	3.53234	3.53234	4.29224	5.65688	5.65688	3.13797	3.15964	3.15964	2.84368	2.44578	6.32353	6.76849	42.4	41.7	35.5	35.5	37.6	36.6
HRH1	H1	6.43	5.48	7.02	7.02	8.45	6.9	6.9	6.63	9.18	9.18	5.92	6.26	5.55	6.46	35.5	36.3	21.5	21.5	14.2	31	31	24.4	14.2	14.2	8.6	36.6	30.1	19.2	5.521	6.62409	3.06268	3.06268	1.68047	4.49275	4.49275	3.68024	1.54684	1.54684	1.4527	5.84665	5.42342	2.97214	35.5	36.3	21.5	21.5	14.2	31
HRH2	H2	6.97	7.17	8.57	8.57	5.92	5.48	5.48	6.17	9.36	9.36	8.61	6.73	9.49	8.89	25.7	21.6	8.8	8.8	15.6	16.4	16.4	10.9	7.6	7.6	9.1			6	3.68723	3.01255	1.02684	1.02684	2.63514	2.9927	2.9927	1.76661	0.811966	0.811966	1.05691			0.674916	25.7	21.6			15.6	16.4
HRH3	H3	3.77	5.45	2.64	2.64	4.14	2.56	2.56	2.75	4.15	4.15	2.71	3.27	2.89	1.77			40.6	40.6	36.7	28.9	28.9	7.5			13.5		6.8				15.3788	15.3788	8.86473	11.2891	11.2891	2.72727			4.98155		2.35294				40.6	40.6	36.7	28.9
HRH4	H4	3.25	3.66	4.09	4.09	4.63	3.28	3.28	3.14	7.26	7.26	7.98	2.72	3.01	2.89	4	2.6	21.1	21.1	16.1	7.6	7.6	2.9	2.8	2.8	4.2	7.9	4		1.23077	0.710383	5.15892	5.15892	3.47732	2.31707	2.31707	0.923567	0.385675	0.385675	0.526316	2.90441	1.3289				21.1	21.1	16.1	7.6
KISSR	Kisspeptin	6.13	7.17	6.68	6.68	6.81	5.85	5.85	4.95	8.58	8.58	6.09	5.99	4.99	4.86	38.9	36.8	35.8	35.8	33.7	32.2	32.2	19.6	31.3	31.3	30.8	24.1	35.3	30	6.34584	5.1325	5.35928	5.35928	4.9486	5.50427	5.50427	3.9596	3.64802	3.64802	5.05747	4.02337	7.07415	6.17284	38.9	36.8	35.8	35.8	33.7	32.2
LPAR1	LPA1	2.05	1.71	3.28	3.28	4.42	3.15	3.15	3.3	3.03	3.03	3.72	3.58	1.2	3.63			20.8	20.8	11.8	7.3	7.3		23.5	23.5	18	21.3	25	11.9			6.34146	6.34146	2.66968	2.31746	2.31746		7.75578	7.75578	4.83871	5.94972	20.8333	3.27824			20.8	20.8	11.8	7.3
LPAR2	LPA2	2.37	1.98	4.12	4.12	3.39	3.31	3.31	4.25	4.23	4.23	4.37	4.35	2.73	4.34	28	25.6	8	8	4.8	5.9	5.9	4.6	13.7	13.7	7.1	13	12.1	8.4	11.8143	12.9293	1.94175	1.94175	1.41593	1.78248	1.78248	1.08235	3.23877	3.23877	1.62471	2.98851	4.43223	1.93548	28	25.6	8	8	4.8	5.9
LPAR3	LPA3	10.12	7.83	11	11	9.29	8.99	8.99	6.42	10.21	10.21	8.92	8.89	8.18	9.32	40.7	33.4	31.5	31.5	24.9	27	27	18.7	23.4	23.4	19.3	31.4	25.4	29.1	4.02174	4.26564	2.86364	2.86364	2.6803	3.00334	3.00334	2.91277	2.29187	2.29187	2.16368	3.53206	3.10513	3.12232	40.7	33.4	31.5	31.5	24.9	27
LPAR4	LPA4	4.2	3.65	4.05	4.05	4.23	4.71	4.71	4.5	4.76	4.76	5.65	8.56	5.01	6.17	14.2	13.7	12.4	12.4	9.4	15	15	16	18	18	14.1	17.4	6.1	12.1	3.38095	3.75342	3.06173	3.06173	2.22222	3.18471	3.18471	3.55556	3.78151	3.78151	2.49558	2.03271	1.21756	1.9611	14.2	13.7	12.4	12.4	9.4	15
LPAR5	LPA5	6.12	6.38	7.13	7.13	5.58	7.53	7.53	5.25	6.02	6.02	5.91	6.4	5.44	5.61			24	24	12.5	27.9	27.9	24.8									3.36606	3.36606	2.24014	3.70518	3.70518	4.72381									24	24	12.5	27.9
LPAR6	LPA6	4.61	5.76	5.74	5.74	5.67	5.93	5.93	4.35	5.6	5.6	5.76	4.76	4.87	4.47	24	24.7	35.9	35.9	31.8	35.3	35.3	28	23.5	23.5	28.1	25	30.1	22.4	5.20607	4.28819	6.25436	6.25436	5.60847	5.95278	5.95278	6.43678	4.19643	4.19643	4.87847	5.2521	6.1807	5.01119	24	24.7	35.9	35.9	31.8	35.3
LT4R1	BLT1	0.93	1.14	2.03	2.03	2.17	3.07	3.07	3.58	3.32	3.32	2.99	1.24	0.8	2.43	7.1	7.1	22	22	27.1	9	9	6	7	7	20.2	5.7	8	5.9	7.63441	6.22807	10.8374	10.8374	12.4885	2.9316	2.9316	1.67598	2.10843	2.10843	6.75585	4.59677	10	2.42798	7.1	7.1	22	22	27.1	9
LT4R2	BLT2	0.91	2.26	2.3	2.3	3.77	2.82	2.82	4.8	2.02	2.02	4.13	2.93	2.02	3.1			18.8	18.8	28.3	20.4	20.4		4.7	4.7	11.3		7.8				8.17391	8.17391	7.50663	7.23404	7.23404		2.32673	2.32673	2.73608		3.86139				18.8	18.8	28.3	20.4
MC3R	MC3	2.47	4.54	3.57	3.57	3.17	3.62	3.62	3.6	6.94	6.94	5.31	4.19	3.11	5.77	3.6	3.7	2.6	2.6	5.4	3.2	3.2	5.8	5.4	5.4	9.2	3.4	2.8	3.3	1.45749	0.814978	0.728291	0.728291	1.70347	0.883978	0.883978	1.61111	0.778098	0.778098	1.73258	0.811456	0.900322	0.571924	3.6				5.4
MC4R	MC4	4.72	4.73	3.29	3.29	2.68	3.14	3.14	3.01	5.62	5.62	5.32	1.69	2.08	2.12	18.4	17.7	11.6	11.6	16.8	9.7	9.7	13.5	12.8	12.8	18.5				3.89831	3.74207	3.52584	3.52584	6.26866	3.08917	3.08917	4.48505	2.27758	2.27758	3.47744				18.4	17.7	11.6	11.6	16.8	9.7
MC5R	MC5	4.35	3.91	5.16	5.16	6.31	5.37	5.37	5.64	7.01	7.01	6.49	3.67	3.47	3.49	5.2	6.6	22.5	22.5	17.7	18	18	18.4	22	22	21.6	12.4	4	4.5	1.1954	1.68798	4.36047	4.36047	2.80507	3.35196	3.35196	3.26241	3.13837	3.13837	3.3282	3.37875	1.15274	1.2894		6.6	22.5	22.5	17.7	18
MCHR1	MCH1	6.17	3.97	11.37	11.37	5.22	4.91	4.91	4.25	7.8	7.8	7.46	6.82	5.95	5.5	45.3	44.2	45	45	48.7	42.6	42.6	18.5	48.7	48.7	30.1	12.9	30.3	32.1	7.34198	11.1335	3.95778	3.95778	9.3295	8.67617	8.67617	4.35294	6.24359	6.24359	4.03485	1.8915	5.09244	5.83636	45.3	44.2	45	45	48.7	42.6
MCHR2	MCH2	3.66	1.58	4.1	4.1	1.57	2.4	2.4	3.05	3.31	3.31	1.78	2.06	1.67	2.35	40.9	39.4	39.6	39.6	41.3	29.8	29.8	20.5	36	36	29.8	37.3	37.9	34.4	11.1749	24.9367	9.65854	9.65854	26.3057	12.4167	12.4167	6.72131	10.8761	10.8761	16.7416	18.1068	22.6946	14.6383	40.9	39.4	39.6	39.6	41.3	29.8
MRGX1	MRGPRX1	9.76	9.3	6.31	6.31	6.17	9.49	9.49	8.09	8.83	8.83	6.16	9.31	9.23	8.32	28.3	30.3	14.1	14.1	9.9	19	19	15.5	16.7	16.7	12.5	33.6	22.4	29.8	2.89959	3.25806	2.23455	2.23455	1.60454	2.00211	2.00211	1.91595	1.89128	1.89128	2.02922	3.60902	2.42687	3.58173	28.3	30.3	14.1	14.1	9.9	19
MRGX2	MRGPRX2	5.07	3.73	5.29	5.29	6.79	4.11	4.11	3.54	6.91	6.91	7.3	4.68	4.61	4.51	29.3	28.2	21.8	21.8	19.5	27.2	27.2	16.8	26.4	26.4	20.1	22.2	24.1	16.8	5.77909	7.56032	4.12098	4.12098	2.87187	6.618	6.618	4.74576	3.82055	3.82055	2.75342	4.74359	5.22777	3.72506	29.3	28.2	21.8	21.8	19.5	27.2
MSHR	MC1	3.96	3.17	6.32	6.32	6.45	7.49	7.49	2.42	6.91	6.91	6.35	4.64	5.73	4.46									7	7	9.7												1.01302	1.01302	1.52756
MTLR	motilin	4.09	2.3	4.69	4.69	2.56	2.62	2.62	3.78	2.72	2.72	1.8	2.41	1.3	2.29	33.4	30.6	36.7	36.7	37.7	23	23	19.8	45.3	45.3	40.2	22.7	33.3	24.7	8.16626	13.3043	7.82516	7.82516	14.7266	8.77863	8.77863	5.2381	16.6544	16.6544	22.3333	9.41909	25.6154	10.786	33.4	30.6	36.7	36.7	37.7	23
MTR1A	MT1	4.61	2.21	3.62	3.62	2.3	4.47	4.47	4.86	4.41	4.41	3.76	7.5	7.92	7.43			29.1	29.1	27.2	26.1	26.1	19.6									8.03867	8.03867	11.8261	5.83893	5.83893	4.03292									29.1	29.1	27.2	26.1
MTR1B	MT2	0.54	1.24	1.64	1.64	0.47	2.06	2.06	2.06	3.04	3.04	2.35	1.6	0.78	1.27			31.7	31.7	27.1	13	13	18.1									19.3293	19.3293	57.6596	6.31068	6.31068	8.78641									31.7	31.7	27.1	13
NK1R	NK1	4.44	5.2	2.42	2.42	5.07	3.56	3.56	3.1	6.77	6.77	6.29	2.6	4.4	3.43	46.3	44.8	45.1	45.1	43.2	44.3	44.3	33.6	39.9	39.9	40.6	41.1	47.3	45.3	10.4279	8.61538	18.6364	18.6364	8.52071	12.4438	12.4438	10.8387	5.89365	5.89365	6.45469	15.8077	10.75	13.207	46.3	44.8	45.1	45.1	43.2	44.3
NK2R	NK2	6.66	4.83	5.38	5.38	4.9	4.55	4.55	2.74	6.92	6.92	9.21	3.8	5.33	5.46	27.9	26	33.4	33.4	26.7	26.9	26.9	20	32.3	32.3	30.7	23.2	30.6	25.9	4.18919	5.38302	6.20818	6.20818	5.44898	5.91209	5.91209	7.29927	4.66763	4.66763	3.33333	6.10526	5.74109	4.74359	27.9	26	33.4	33.4	26.7	26.9
NK3R	NK3	6.42	4.94	5.86	5.86	5.99	4.87	4.87	3.26	9.53	9.53	11.13	4.23	6.95	4.4	38	34.8	36.1	36.1	33.3	24.6	24.6	17	35.7	35.7	35.7	22.9	31	36.6	5.919	7.04453	6.16041	6.16041	5.55927	5.05133	5.05133	5.21472	3.74607	3.74607	3.20755	5.41371	4.46043	8.31818	38	34.8	36.1	36.1	33.3	24.6
NMBR	BB1	3.61	3.66	3.17	3.17	2.99	4.84	4.84	4.57	6.1	6.1	6.07	4.84	3.91	4.78	34.3	34	34.9	34.9	35	29.3	29.3	22.3	38.3	38.3	32.7	9.6	30.8	33.3	9.50139	9.28962	11.0095	11.0095	11.7057	6.05372	6.05372	4.87965	6.27869	6.27869	5.38715	1.98347	7.87724	6.96653	34.3	34	34.9	34.9	35	29.3
NMUR1	NMU1	4.98	3.6	4.74	4.74	4.69	4.67	4.67	6.69	7.13	7.13	7.48	4.14	4.62	6.04	22.8	24.9	21.7	21.7	28.9	7.3	7.3	8.3	37.8	37.8	36	6.9	13	12.9	4.57831	6.91667	4.57806	4.57806	6.16205	1.56317	1.56317	1.24066	5.30154	5.30154	4.81283	1.66667	2.81385	2.13576	22.8	24.9	21.7	21.7	28.9	7.3
NMUR2	NMU2	3.18	1.73	3.51	3.51	3.48	2.36	2.36	2.3	4.83	4.83	2.59	3.82	1.75	3.06	21.2	19.7	37.3	37.3	32.9	32.7	32.7	24.5	31	31	29	37.5	37.8	24	6.66667	11.3873	10.6268	10.6268	9.45402	13.8559	13.8559	10.6522	6.41822	6.41822	11.1969	9.81675	21.6	7.84314	21.2	19.7	37.3	37.3	32.9	32.7
NPBW1	NPBW1	4.6	2.19	3.8	3.8	5.54	4.7	4.7	4.54	8.62	8.62	8.17	4.9	4.06	5.7			24.9	24.9	23.7	11	11										6.55263	6.55263	4.27798	2.34043	2.34043										24.9	24.9	23.7	11
NPFF1	NPFF1	4.42	4.42	2.62	2.62	3.53	4.63	4.63	5.75	5.34	5.34	3.75	4.64	15.77	18.61			39.7	39.7	38.7	33.7	33.7	23.5									15.1527	15.1527	10.9632	7.27862	7.27862	4.08696									39.7	39.7	38.7	33.7
NPFF2	NPFF2	3.25	3.45	3.77	3.77	2.24	2.71	2.71	3.28	6.95	6.95	6.95	3.7	12.26	13.48			37	37	34.7	31.8	31.8	23.9									9.81432	9.81432	15.4911	11.7343	11.7343	7.28659									37	37	34.7	31.8
NTR1	NTS1	3.85	3.21	4.21	4.21	5.23	4.96	4.96	4.97	6.12	6.12	4.66	1.62	3.8	6.73	12.1	10.2	25.9	25.9	27	18	18	12.2	37.4	37.4	37.3	8.7	18.6	13.6	3.14286	3.17757	6.15202	6.15202	5.16252	3.62903	3.62903	2.45473	6.11111	6.11111	8.00429	5.37037	4.89474	2.0208	12.1	10.2	25.9	25.9	27	18
OPRD	𝛅	4.09	3.81	5.55	5.55	10.77	6.14	6.14	5.67	5.14	5.14	7.48	2.86	3.27	4.75			19.6	19.6	18.9	11.2	11.2	7.3			16.7	6.3	9.1				3.53153	3.53153	1.75487	1.8241	1.8241	1.28748			2.23262	2.2028	2.78287				19.6	19.6	18.9	11.2
OPRK	𝜅	3.66	3.39	3.54	3.54	2.85	1.39	1.39	2.57	4.3	4.3	5.25	2.34	3.07	3.12			38.1	38.1	36.4	22.9	22.9	20.7	2.8	2.8	14.3	2.8	6.6				10.7627	10.7627	12.7719	16.4748	16.4748	8.05447	0.651163	0.651163	2.72381	1.19658	2.14984				38.1	38.1	36.4	22.9
OPRM	μ	5.61	6.7	8.52	8.52	7.94	7.13	7.13	7	5.44	5.44	8.84	6.63	7.53	7.06			26.8	26.8	25.6	15.5	15.5	11.9			10.7						3.14554	3.14554	3.22418	2.17391	2.17391	1.7			1.21041						26.8	26.8	25.6	15.5
OPRX	NOP	3.28	2.96	3.83	3.83	4.44	3.56	3.56	2.05	4.7	4.7	6.83	2.68	3.76	4.45			49.1	49.1	45.9	44.9	44.9	33.9	16.1	16.1	38.3	17	31.5	17.7			12.8198	12.8198	10.3378	12.6124	12.6124	16.5366	3.42553	3.42553	5.60761	6.34328	8.37766	3.97753			49.1	49.1	45.9	44.9
OX1R	OX1	7.39	4.99	4.94	4.94	4.61	6.4	6.4	4.22	7.04	7.04	3.55	4.56	4.64	4.89	42.8	40.9	34.7	34.7	18.6	39.2	39.2	22	35.3	35.3	31.4	19.4	34.1	32.8	5.79161	8.19639	7.02429	7.02429	4.03471	6.125	6.125	5.21327	5.0142	5.0142	8.84507	4.25439	7.34914	6.70757	42.8	40.9	34.7	34.7	18.6	39.2
OX2R	OX2	3.32	5	4.12	4.12	3.42	3.55	3.55	3.83	2.82	2.82	2.46	2.93	1.66	4.63	30.2	27.4	36.4	36.4	35.5	30.7	30.7	20.8	42.3	42.3	39.5	26.2	31.4	40.3	9.09639	5.48	8.83495	8.83495	10.3801	8.64789	8.64789	5.43081	15	15	16.0569	8.94198	18.9157	8.7041	30.2	27.4	36.4	36.4	35.5	30.7
OXGR1	Oxoglutarate	1.56	1.36	1.72	1.72	2.5	1.72	1.72	1.76	1.57	1.57	2.84	3.5	1.91	2.86	17	16.3	20.5	20.5	11.6	21.5	21.5	10.8	7.4	7.4	3.8				10.8974	11.9853	11.9186	11.9186	4.64	12.5	12.5	6.13636	4.71338	4.71338	1.33803				17	16.3	20.5	20.5	11.6	21.5
OXYR	OT	5.52	3.37	5.96	5.96	5.98	7.2	7.2	5.7	9.63	9.63	6.57	8.06	4.63	7.36	22.1	20.1	18.6	18.6					27.6	27.6	15.4				4.00362	5.96439	3.12081	3.12081					2.86604	2.86604	2.34399				22.1	20.1	18.6	18.6
P2RY1	P2Y1	12.41	13.28	12.53	12.53	8.65	12.27	12.27	9.94	9.87	9.87	4.93	9.38	12.3	7.11	10.1	11	7.3	7.3	2.2	10.4	10.4	12.3				17.2	9.4	3.9	0.81386	0.828313	0.582602	0.582602	0.254335	0.847596	0.847596	1.23742				1.83369	0.764228	0.548523
P2RY2	P2Y2	10.2	10.69	7.54	7.54	7.96	8.37	8.37	9.02	7.46	7.46	7.11	11.34	13.4	13.47	5	7.2										8.7	8	6.6	0.490196	0.673527										0.767196	0.597015	0.489978
P2RY4	P2Y4	2.67	1.79	2.91	2.91	4.94	1.33	1.33	2.61	4.61	4.61	4.75	2.11	0.86	3.41	5.3	8.5	10.1	10.1	4.2	8.9	8.9	8.1				8.4	4.6	11	1.98502	4.7486	3.47079	3.47079	0.850202	6.69173	6.69173	3.10345				3.98104	5.34884	3.22581	5.3	8.5	10.1	10.1		8.9
P2RY6	P2Y6	12.66	13.61	9.43	9.43	6.16	12.2	12.2	7.62	4.45	4.45	4.72	8.78	9.74	10.42	11.7	11.8	2.8	2.8		5.5	5.5	7.3				8.7	6.4	7.8	0.924171	0.86701	0.296925	0.296925		0.45082	0.45082	0.958005				0.990888	0.657084	0.74856
P2Y10	P2RY10	2.57	2.15	2.63	2.63	3.02	2.38	2.38	3.55	3.19	3.19	3.26	2.82	3.44	5.18			9.6	9.6	12.7	12.9	12.9	17.2	4.3	4.3	9.4		13.6	12.1			3.65019	3.65019	4.2053	5.42017	5.42017	4.84507	1.34796	1.34796	2.88344		3.95349	2.33591			9.6	9.6	12.7	12.9
P2Y11	P2Y11	6.89	3.46	3.7	3.7	3.38	2.46	2.46	6.48	3.32	3.32	2.94	4.56	3.04	2.66	7.2	11.5	16.4	16.4	14.6	30.2	30.2	22.2	11.1	11.1	8.5	37	18.3	12.3	1.04499	3.3237	4.43243	4.43243	4.31953	12.2764	12.2764	3.42593	3.34337	3.34337	2.89116	8.11404	6.01974	4.62406		11.5	16.4	16.4	14.6	30.2
P2Y12	P2Y12	5.54	4.18	11.69	11.69	11.58	12.93	12.93	7.36	8.22	8.22	7.54	4.63	5.01	5.12			12	12	9	20.3	20.3	18.4	13.6	13.6	20.9		28.9	24.4			1.02652	1.02652	0.777202	1.56999	1.56999	2.5	1.6545	1.6545	2.77188		5.76846	4.76562						20.3
P2Y13	P2Y13	0.47	0.89	2.81	2.81	3.4	2.38	2.38	3.15	2.34	2.34	4.81	2.14	4.2	4.02			9.6	9.6	5.8	8.8	8.8	2.5	17.4	17.4	18.4	4	4.1	6.3			3.41637	3.41637	1.70588	3.69748	3.69748	0.793651	7.4359	7.4359	3.82536	1.86916	0.97619	1.56716			9.6	9.6	5.8	8.8
P2Y14	P2Y14	2.98	2.67	6.6	6.6	4.98	6.02	6.02	3.04	2.5	2.5	3.97	2.61	2.89	3.91			6.2	6.2	3.2	6.9	6.9	4.6	4	4	7.6						0.939394	0.939394	0.64257	1.14618	1.14618	1.51316	1.6	1.6	1.91436
PACR	PAC1	2.36	3.41	1.46	1.46	1.83	1.09	1.09	2.23	2.03	2.03	3.6	2.56	2.07	0.71	47.5	46	34.2	34.2	36.1	35.9	35.9	26.1	43.8	43.8	42.1			25.8	20.1271	13.4897	23.4247	23.4247	19.7268	32.9358	32.9358	11.704	21.5764	21.5764	11.6944			36.338	47.5	46	34.2	34.2	36.1	35.9
PAR1	PAR1	8.32	7.88	4.1	4.1	4.89	7.08	7.08	6.86	2.38	2.38	4	3.03	1.95	5.36			26	26	19.9	31.6	31.6	19.5	26.7	26.7	26.2	30.3	25.6	29.7			6.34146	6.34146	4.06953	4.46328	4.46328	2.84257	11.2185	11.2185	6.55	10	13.1282	5.54104			26	26	19.9	31.6
PAR2	PAR2	8.76	5.8	3.81	3.81	4.99	3.86	3.86	4.44	3.12	3.12	4.95	3.77	1.73	2.74	22.5	21.6	30.5	30.5	28.7	34.4	34.4	21.7	26.2	26.2	28.4	34.7	31.7	32.6	2.56849	3.72414	8.00525	8.00525	5.7515	8.91192	8.91192	4.88739	8.39744	8.39744	5.73737	9.20424	18.3237	11.8978	22.5	21.6	30.5	30.5	28.7	34.4
PAR3	PAR3	8.06	7.5	5.27	5.27	4.61	8.66	8.66	6.44	9.89	9.89	7.3	5.53	3.1	9.18	35.9	36.2	39.7	39.7	33.8	31.8	31.8	21.6	27.2	27.2	27.6	36.7	37.2	34.3	4.45409	4.82667	7.53321	7.53321	7.33189	3.67206	3.67206	3.35404	2.75025	2.75025	3.78082	6.63653	12	3.73638	35.9	36.2	39.7	39.7	33.8	31.8
PAR4	PAR4	9.77	10.03	7.12	7.12	3.09	8.05	8.05	7.74	5.7	5.7	5.45	11	7.25	4.16	37.8	36.2	34.5	34.5	17.8	33.3	33.3	27.4	21.7	21.7	15.8	50.7	34	25.6	3.86899	3.60917	4.84551	4.84551	5.76052	4.13665	4.13665	3.54005	3.80702	3.80702	2.89908	4.60909	4.68966	6.15385	37.8	36.2	34.5	34.5	17.8	33.3
PD2R	DP1	6.15	5.12	7.38	7.38	8.34	6.7	6.7	5.8	8.16	8.16	5.45	3.77	2.22	3.08	38.2	37.8							25.9	25.9	20.3		3.4	18.8	6.21138	7.38281							3.17402	3.17402	3.72477		1.53153	6.1039	38.2	37.8
PE2R1	EP1	7.9	4.89	5.91	5.91	5.05	5.25	5.25	7.67	6.4	6.4	6.27	5.48	3.07	5.04	34.8	33.7	24.2	24.2	12	11.5	11.5	8.8	39	39	33.6	10.2	36.3	27.4	4.40506	6.89162	4.09475	4.09475	2.37624	2.19048	2.19048	1.14733	6.09375	6.09375	5.35885	1.86131	11.8241	5.43651	34.8	33.7	24.2	24.2	12	11.5
PE2R2	EP2	4.57	4.26	4.27	4.27	4.38	4.55	4.55	5.1	7.29	7.29	5.62	5.61	4.4	3.63	41.9	36.4							7.3	7.3	5.4				9.16849	8.5446							1.00137	1.00137	0.960854				41.9	36.4
PE2R3	EP3	4.8	5.05	4.26	4.26	3.57	4.3	4.3	2.62	6.16	6.16	6.76	3.45	3.07	1.87	37.3	33.4	45.1	45.1	41.2	42.1	42.1	30.9	24.2	24.2	33.7	17.1	42.8	42.2	7.77083	6.61386	10.5869	10.5869	11.5406	9.7907	9.7907	11.7939	3.92857	3.92857	4.98521	4.95652	13.9414	22.5668	37.3	33.4	45.1	45.1	41.2	42.1
PE2R4	EP4	8.93	8.48	7.01	7.01	7.83	7.47	7.47	7.38	7.87	7.87	8.38	7.02	9.03	9.03	31	29.3	29.2	29.2					8.7	8.7			8.8	10.5	3.47144	3.45519	4.16548	4.16548					1.10546	1.10546			0.974529	1.16279	31	29.3	29.2	29.2
PF2R	FP	3.97	3.28	1.72	1.72	2.04	3.85	3.85	5.69	3.26	3.26	4.42	3.81	3.95	2.89	31	30.9	11.8	11.8	14.7	9.2	9.2	8.6	30.1	30.1	25.8	17.9	15.1	22.7	7.80856	9.42073	6.86047	6.86047	7.20588	2.38961	2.38961	1.51142	9.23313	9.23313	5.8371	4.69816	3.82278	7.85467	31	30.9	11.8	11.8	14.7	9.2
PI2R	IP	4.1	4.66	4.87	4.87	4.25	4.69	4.69	4.28	7.11	7.11	7.28	3.41	4.81	4.38	44.5	44.6							36.5	36.5	8.4		8.7		10.8537	9.57082							5.13361	5.13361	1.15385		1.80873		44.5	44.6
PRLHR	PrRP	3.09	3.33	1.99	1.99	3.05	1.91	1.91	0.88	4.36	4.36	2.99	1.57	2.74	3.31			17.5	17.5	25	17.5	17.5		33.1	33.1	31.5			15.4			8.79397	8.79397	8.19672	9.1623	9.1623		7.59174	7.59174	10.5351			4.65257			17.5	17.5	25	17.5
PTAFR	PAF	8.08	6.93	9.92	9.92	8.2	7.61	7.61	4.39	8.05	8.05	8.99	8.88	10.57	4.04	22.2	23.8	8.6	8.6	4.4	13.1	13.1	11.2	7.7	7.7	5.7	13.2	9.1	29.4	2.74752	3.43434	0.866935	0.866935	0.536585	1.72142	1.72142	2.55125	0.956522	0.956522	0.634038	1.48649	0.860927	7.27723	22.2	23.8				13.1
PTH1R	PTH1	3.8	2.68	2.75	2.75	2.88	2.63	2.63	1.86	5.72	5.72	6.9	3.88	2.43	3.96	34.3	32.6							14.7	14.7	11.3				9.02632	12.1642							2.56993	2.56993	1.63768				34.3	32.6
PTH2R	PTH2	4.2	3.92	4.8	4.8	4.76	3.18	3.18	3.69	6.74	6.74	5.78	2.8	3.65	3.94	27.5	22.2	7.9	7.9	6.3	7.3	7.3	8.3	18.4	18.4	16	5.3	4.5	7.7	6.54762	5.66327	1.64583	1.64583	1.32353	2.2956	2.2956	2.24932	2.72997	2.72997	2.76817	1.89286	1.23288	1.95431	27.5	22.2	7.9	7.9		7.3
S1PR1	S1P1	1.29	1.62	0.74	0.74	1.61	1.61	1.61	1.46	3.56	3.56	3.31	1.17	1.18	1.86			25.8	25.8	17.4	21.8	21.8	16.8					21.1	24.5			34.8649	34.8649	10.8075	13.5404	13.5404	11.5068					17.8814	13.172			25.8	25.8	17.4	21.8
S1PR2	S1P2	4.36	5.05	2.8	2.8	3.15	3.82	3.82	3.25	5.82	5.82	2.74	4.6	5.03	6.01	15.4	14.5	26.4	26.4	20.4	25.9	25.9	13.7	25.9	25.9	24.1	26.3	22.8	7.2	3.53211	2.87129	9.42857	9.42857	6.47619	6.7801	6.7801	4.21538	4.45017	4.45017	8.79562	5.71739	4.5328	1.198	15.4	14.5	26.4	26.4	20.4	25.9
S1PR3	S1P3	4.67	2.86	3.74	3.74	4.39	6.42	6.42	4.51	6.36	6.36	8.27	1.8	1.78	4.46	34.9	34.3	22.6	22.6	13.7	15.8	15.8	9.3	24.8	24.8	29.9	28.3	14.4	14.2	7.47323	11.993	6.04278	6.04278	3.12073	2.46106	2.46106	2.06208	3.89937	3.89937	3.61548	15.7222	8.08989	3.18386	34.9	34.3	22.6	22.6	13.7	15.8
S1PR5	S1P5	5.1	5.09	6.06	6.06	4.59	5.37	5.37	3.58	6.02	6.02	4.47	3.74	3.1	5.88			11.6	11.6	19.6								2.2	15.2			1.91419	1.91419	4.27015								0.709677	2.58503			11.6	11.6	19.6
SSR1	SST1	3.38	3.24	2.73	2.73	4.83	3.6	3.6	4.55	3.69	3.69	4.28	2.88	3.35	3.36			34.5	34.5	26.9	25.7	25.7	12.5			15.5	14.1	33.9	9.9			12.6374	12.6374	5.56936	7.13889	7.13889	2.74725			3.6215	4.89583	10.1194	2.94643			34.5	34.5	26.9	25.7
SSR2	SST2	6.28	5.43	6.67	6.67	6.01	5.86	5.86	6.42	9.59	9.59	9.43	6.74	4.67	7.16			28.7	28.7	35.8	19.3	19.3	10.1			22.8	9.5					4.30285	4.30285	5.95674	3.29352	3.29352	1.57321			2.41782	1.4095					28.7	28.7	35.8	19.3
SSR3	SST3	2.84	1.7	3.45	3.45	4.46	2.85	2.85	2.75	6.8	6.8	8.17	1.61	2.29	4			33.3	33.3	34.5	18	18	12.3	3.9	3.9	15.1	9	7.2				9.65217	9.65217	7.73543	6.31579	6.31579	4.47273	0.573529	0.573529	1.84823	5.59006	3.1441				33.3	33.3	34.5	18
SSR4	SST4	4.02	3.33	4.26	4.26	3.3	5.45	5.45	2.56	4.69	4.69	5.31	0.98	3.5	5.16			35.5	35.5	32.8	19	19	9.4			11.8	8.9	29				8.33333	8.33333	9.93939	3.48624	3.48624	3.67188			2.22222	9.08163	8.28571				35.5	35.5	32.8	19
SSR5	SST5	5.98	3.96	7.85	7.85	4.86	7.16	7.16	4.25	6.19	6.19	3.04	6.17	3.9	3.62	17.7	13.5	47.4	47.4	39	43.6	43.6	31.5	36.7	36.7	35.6	43.6	46.3	33.2	2.95987	3.40909	6.03822	6.03822	8.02469	6.08939	6.08939	7.41176	5.92892	5.92892	11.7105	7.06645	11.8718	9.17127	17.7	13.5	47.4	47.4	39	43.6
TA2R	TP	3.44	2.85	2.17	2.17	1.78	1.71	1.71	2.13	5.96	5.96	7.14	2.58	1	2.55	48.1	47.3	48.5	48.5	37.3	24.3	24.3	11.5	43.5	43.5	42.1	16.5	47.1	50.6	13.9826	16.5965	22.3502	22.3502	20.9551	14.2105	14.2105	5.39906	7.29866	7.29866	5.89636	6.39535	47.1	19.8431	48.1	47.3	48.5	48.5	37.3	24.3
TRFR	TRH1	5.49	7.26	13.73	13.73	7.89	7.07	7.07	8.65	7.81	7.81	8.25	2.11	8.72	9.64	42.9	38	34.4	34.4	37.7	31.6	31.6	18.4	46.4	46.4	41.9	26.6	25.2	27.9	7.81421	5.23416	2.50546	2.50546	4.7782	4.46959	4.46959	2.12717	5.9411	5.9411	5.07879	12.6066	2.88991	2.89419	42.9	38	34.4	34.4	37.7	31.6
UR2R	UT	3.69	5.23	6.21	6.21	5.24	6.41	6.41	4.72	6.81	6.81	5.56	3.78	3.53	1.91	29.6	30.6	17.2	17.2	10.7	14.1	14.1	18.7	11.1	11.1	14.8	20.5	31.5	16.9	8.02168	5.85086	2.76973	2.76973	2.04198	2.19969	2.19969	3.96186	1.62996	1.62996	2.66187	5.42328	8.92351	8.84817	29.6	30.6	17.2	17.2	10.7	14.1
V1AR	V1A	3.39	3.91	6.02	6.02	6.42	4.71	4.71	3.66	4.55	4.55	4.56	2.31	3.91	4.9	40.3	38.1	29.3	29.3	28.8	9.2	9.2	12.4	34.2	34.2	28.1	7.6	11.4		11.8879	9.74425	4.86711	4.86711	4.48598	1.95329	1.95329	3.38798	7.51648	7.51648	6.16228	3.29004	2.9156		40.3	38.1	29.3	29.3	28.8	9.2
V1BR	V1B	4.82	3.46	9.59	9.59	7.66	6.04	6.04	4.73	6.48	6.48	4.73	5.49	4.48	5.54	45.1	43.6	33.9	33.9	33.7	14.9	14.9	15.9	41.1	41.1	24.1	3.1	7.3	7.3	9.35685	12.6012	3.53493	3.53493	4.39948	2.46689	2.46689	3.36152	6.34259	6.34259	5.09514	0.564663	1.62946	1.31769	45.1	43.6	33.9	33.9	33.7	14.9
V2R	V2	5.83	4.96	5.52	5.52	7.23	5.13	5.13	5.06	7.83	7.83	7.46	5.75	4.15	5.59	49.6	48.1							25.4	25.4					8.50772	9.69758							3.24393	3.24393					49.6	48.1
[truncated: 55 more columns]

## Sheet: B-LogEmaxOverpEC50
Receptor (UniProt)	B-Emax Min Max Gs	B-Emax Min Max Gi1	B-Emax Min Max Gi2	B-Emax Min Max GoA	B-Emax Min Max GoB	B-Emax Min Max Gz	B-Emax Min Max Gq	B-Emax Min Max G11	B-Emax Min Max G14	B-Emax Min Max G15	B-Emax Min Max G12	B-Emax Min Max G13	B-pEC50 >1.4SD Gs	B-pEC50 >1.4SD Gi1	B-pEC50 >1.4SD Gi2	B-pEC50 >1.4SD GoA	B-pEC50 >1.4SD GoB	B-pEC50 >1.4SD Gz	B-pEC50 >1.4SD Gq	B-pEC50 >1.4SD G11	B-pEC50 >1.4SD G14	B-pEC50 >1.4SD G15	B-pEC50 >1.4SD G12	B-pEC50 >1.4SD G13	B-Gs-Log EmEC	B-Gi1-Log EmEC	B-Gi2-Log EmEC	B-GoA-Log EmEC	B-GoB-Log EmEC	B-Gz-Log EmEC	B-Gq-Log EmEC	B-G11-Log EmEC	B-G14-Log EmEC	B-G15-Log EmEC	B-G12-Log EmEC	B-G13-Log EmEC	B-Gs/olf-Log EmEC-MAX	B-Gi/o-Log EmEC-MAX	B-Gq/11-Log EmEC-MAX	B-G12/13-Log EmEC-MAX	B-Gs/olf-Log EmEC-AVG	B-Gi/o-Log EmEC-AVG	B-Gq/11-Log EmEC-AVG	B-G12/13-Log EmEC-AVG	B-Gs-Log EmEC-gn	B-Gi1-Log EmEC-gn	B-Gi2-Log EmEC-gn	B-GoA-Log EmEC-gn	B-GoB-Log EmEC-gn
5HT1A		68.3207	55.4046	58.871	67.496	55.8005			16.0264	75.6888				7.785	7.422	8.613	8.711	8.592			6.215	6.835				9.61955	9.16555	10.3829	10.5403	10.3386			7.41984	8.71403				10.5403	8.71403			10.0094	8.06693			0.704937	0.559443	0.949566	1
5HT1B		19.2308	23.4297	23.3495	24.8989	38.051				12.0056				9.356	9.336	9.575	9.597	8.932				7.153				10.64	10.7058	10.9433	10.9932	10.5124				8.23238				10.9932	8.23238			10.7589	8.23238			0.872072	0.895895	0.981925	1
5HT1D		9.89816	15.9071	19.7124	17.8297	39.0081								9.614	9.53	9.21	9.11	4.548								10.6096	10.7316	10.5047	10.3611	6.13916								10.7316				9.66924				0.973427	1	0.950603	0.919335
5HT2A		9.00975	4.77797	9.12903	11.786	43.7645	19.5487	13.1269	28.2762	72.6804				6.9	6.905	6.799	6.921	7.448	9.282	9.495	9.228	8.123				7.85471	7.58424	7.75942	7.99237	9.08912	10.5731	10.6132	10.6794	9.98442				9.08912	10.6794			8.05597	10.4625			0.0873841	0	0.0565981	0.131858
5HT2B					13.4142	23.2628	24.6361	23.652	25.7548	11.3496							7.779	8.77	8.547	8.477	8.19	7.935							8.90657	10.1367	9.93857	9.85087	9.60086	8.98998				10.1367	9.93857			9.52161	9.59507						0
5HT2C		43.5536	37.9053	60.8602	98.6853	68.8225				62.1181	83.4426	44.874		7.245	7.27	7.37	7.545	9.276				8.625	8.146	7.643		8.88402	8.8487	9.15433	9.53925	11.1137				10.4182	10.0674	9.29499		11.1137	10.4182	10.0674		9.50801	10.4182	9.68119		0.0155953	0	0.134936	0.304875
AA1R				8.35215	11.6667	7.4884				8.17432	62.3607					7.676	7.379	7.24				7.699	5.889					8.5978	8.44595	8.11439				8.61145	7.68391			8.5978	8.61145	7.68391		8.38604	8.61145	7.68391				0.98528	0.821566
AA2AR	33.9406									10.0281	58.4918	20.4899	6.299									6.623	6.78	6.17	7.82972									7.62422	8.5471	7.48154	7.82972		7.62422	8.5471	7.82972		7.62422	8.01432	0.326758
AA2BR	79.4091									64.6111			6.124									6.203			8.02387									8.01331			8.02387		8.01331		8.02387		8.01331		1
AA3R		48.7974	39.702	5.00269	3.94822					4.67104				6.951	7.029	6.728	7.436					8.388				8.6394	8.62781	7.4272	8.0324					9.05741				8.6394	9.05741			8.1817	9.05741			0.743581	0.736475	0	0.371239
ACM1	52.4801	28.8624	23.5904	33.0108	44.195	60.3248	72.4129	71.7683	82.6317	83.5145			6.111	5.469	5.34	5.271	5.398	5.914	7.822	8.003	7.771	7.722			7.83099	6.92933	6.71274	6.78966	7.04337	7.6945	9.68182	9.85893	9.68815	9.64376			7.83099	7.6945	9.85893		7.83099	7.03392	9.71816		0.355432	0.068844	0	0.0244485	0.105091
ACM2	34.1855	72.2427	57.026	65.5914	67.8196	75.6381			12.9856	89.7188			6.073	8.07	7.945	8.634	9.055	8.517			5.442	7.484			7.60684	9.92879	9.70107	10.4508	10.8864	10.3957			6.55546	9.43688			7.60684	10.8864	9.43688		7.60684	10.2726	7.99617		0.242763	0.7789	0.726319	0.899441	1
ACM3		36.2947	17.0611	29.7849	33.5356	34.4258	82.3341	90.558	100	100				5.873	5.835	5.957	5.948	5.976	7.327	7.504	7.366	7.56				7.43284	7.06701	7.431	7.47351	7.51288	9.24258	9.46093	9.366	9.56				7.51288	9.56			7.38345	9.40738			0.146746	0	0.146006	0.163057
ACM4		75.623	88.2705	74.3548	69.2759	44.4316	9.77701		15.6477	81.4714				8.236	8.403	8.563	9.171	8.672	5.722		5.733	6.945				10.1147	10.3488	10.4343	11.0116	10.3197	6.71221		6.92745	8.85601				11.0116	8.85601			10.4458	7.49855			0.791382	0.845846	0.865731	1
ADA1A	56.9504	4.50596		10.2419			92.4022	87.9327	89.5466	97.4695			6.822	7.245		7.436			7.741	7.676	6.713	7.782			8.5775	7.89879		8.44638			9.70668	9.62015	8.66505	9.77087			8.5775	8.44638	9.77087		8.5775	8.17258	9.44069		0.362543	0		0.292506
ADA2A	27.5873	93.3044	71.005	63.9516	78.5801	32.3956	7.52971	3.43772	7.09447	81.5651	55.4918	64.0045	5.862	8.517	8.573	8.859	9.146	10.03	5.846	5.989	5.649	6.32	6.194	5.655	7.30271	10.4869	10.4243	10.6649	11.0413	11.5405	6.72278	6.52527	6.49992	8.2315	7.93823	7.46121	7.30271	11.5405	8.2315	7.93823	7.30271	10.8316	6.99487	7.69972	0.159266	0.790979	0.778557	0.826283	0.900969
ADA2B		67.2589	46.5235	51.6667	70.1861	46.2297				24.7423				7.671	7.609	8.283	8.567	8.954				6.543				9.49875	9.27667	9.99621	10.4133	10.6189				7.93644				10.6189	7.93644			9.96076	7.93644			0.582412	0.499624	0.76786	0.923328
ADA2C		82.156	55.8574	74.8925	73.1796	39.6752				12.1931		4.92495		8.597	8.763	9.398	9.758	10.33				6.158		6.578		10.5116	10.5101	11.2724	11.6224	11.9285				7.24411		7.2704		11.9285	7.24411	7.2704		11.169	7.24411	7.2704		0.697533	0.6972	0.859944	0.934649
ADRB1	84.4917			15.1263	31.0275	43.0394	4.63613		20.8744	66.0169	78.6967	13.4353	9.703			6.573	6.562	6.915	6.103		6.094	8.38	6.392	6.05	11.6298			7.75273	8.05375	8.54887	6.76916		7.41361	10.1997	8.28796	7.17825	11.6298	8.54887	10.1997	8.28796	11.6298	8.11845	8.12747	7.7331	1			0.202355	0.264283
ADRB2	83.2823									71.9025			8.275									6.451			10.1956									8.30774			10.1956		8.30774		10.1956		8.30774		1
AGTR1		3.96425	6.1598	12.1022	7.70024	8.58469	33.2621	53.1081	25.56	21.1434	100	82.1297		8.268	8.164	8.421	8.269	7.86	9.351	9.336	8.848	8.919	9.07	8.729		8.86616	8.95357	9.50386	9.1555	8.79372	10.8729	11.0612	10.2556	10.2442	11.07	10.6435		9.50386	11.0612	11.07		9.05456	10.6085	10.8568		0.0318223	0.070221	0.311974	0.158935
APJ		58.3532	47.6921	42.4731	55.805	36.8329				3.68791	17.5164	4.55253		9.514	9.613	9.447	9.438	8.793				7.283	8.235	7.25		11.2801	11.2914	11.0751	11.1847	10.3592				7.84978	9.47844	7.90825		11.2914	7.84978	9.47844		11.0381	7.84978	8.69335		0.996693	1	0.937143	0.968976
BKRB1		10.2665	9.59684	21.8548	32.5647	9.37355	22.8335	23.7109	17.5089	7.39644				6.643	6.753	6.704	6.775	6.928	6.905	6.805	6.883	7.536				7.65442	7.73513	8.04355	8.28775	7.8999	8.26357	8.17995	8.12626	8.40502				8.28775	8.40502			7.92415	8.2437			0	0.107521	0.518418	0.843758
BKRB2		51.7876	37.5694	40.0269	72.8762	59.1357	76.9262	94.3607	94.2755	98.313	68.1803	68.5358		8.143	7.871	7.833	8.136	8.649	9.714	9.542	9.535	8.754	10.16	9.158		9.85723	9.44583	9.43535	9.99859	10.4208	11.6001	11.5168	11.5094	10.7466	11.9937	10.9939		10.4208	11.6001	11.9937		9.83157	11.3432	11.4938		0.164904	0.00409736	0	0.220159
C5AR1		81.3326	59.6991	53.7634	81.2095	57.3086				66.0075				9.165	9.521	9.167	9.439	8.811				9.441				11.0753	11.297	10.8975	11.3486	10.5692				11.2606				11.3486	11.2606			11.0375	11.2606			0.649286	0.933744	0.421186	1
CALCR	54.6234	45.2438	41.411	67.1505	85.4369	34.9768	26.9729	15.3991	28.1788	61.0965	43.1967	32.9793	11.98	8.352	8.494	8.543	9.057	8.26	8.65	8.218	8.428	10.6	9.605	10.12	13.7174	10.0076	10.1111	10.37	10.9886	9.80378	10.0809	9.4055	9.87792	12.386	11.2405	11.6382	13.7174	10.9886	12.386	11.6382	13.7174	10.2562	10.4376	11.4393	1	0.139629	0.163646	0.223697	0.36716
CALCR+RAMP3	32.7465									11.4527	51.082	38.3461	7.785									7.219	8.601	8.494	9.30016									8.27791	10.3093	10.0777	9.30016		8.27791	10.3093	9.30016		8.27791	10.1935	0.503238
CCKAR	39.9418	54.3879	32.3693	63.2796	48.6448	48.8399	61.0362	64.5044	65.0904	79.5127	77.1967	100	8.477	8.695	8.852	9.129	9.038	8.533	9.729	9.886	9.925	8.911	10.62	9.188	10.0784	10.4305	10.3621	10.9303	10.725	10.2218	11.5146	11.6956	11.7385	10.8114	12.5076	11.188	10.0784	10.9303	11.7385	12.5076	10.0784	10.5339	11.44	11.8478	0	0.144936	0.116791	0.350669	0.266185
CCR5		55.0379	47.7797	53.7366	62.2977	31.4965				6.11153				9.151	9.19	9.204	9.314	10.03				7.595				10.8917	10.8692	10.9343	11.1085	11.5283				8.38115				11.5283	8.38115			11.0664	8.38115			0.797719	0.790596	0.811258	0.866611
CCR6		46.4355	32.5007	15.8817	27.8924	36.8039				13.6832	27.5164			7.676	8.681	8.33	8.665	9.046				9.015	9.902			9.34285	10.1929	9.5309	10.1105	10.6119				10.1512	11.3416			10.6119	10.1512	11.3416		9.9578	10.1512	11.3416		0	0.425289	0.0940828	0.384059
CLTR1		99.3499	47.2831	84.7581	88.39	56.5835	87.6085	92.3711	50.0595	72.2306				8.162	8.576	8.101	8.451	8.963	7.247	7.055	7.01	7.483				10.1592	10.2507	10.0292	10.3974	10.7157	9.18955	9.02054	8.70949	9.34172				10.7157	9.34172			10.3104	9.06532			0.722599	0.768227	0.657807	0.841349
CLTR2		51.3651	28.7613	62.5	84.284	51.4791	49.6061	92.2534	67.049	46.5886	79.7049	86.3353		7.18	7.288	7.403	7.797	9.087	8.934	8.497	8.972	9.618	9.632	8.163		8.89067	8.74681	9.19888	9.72275	10.7986	10.6295	10.462	10.7984	11.2863	11.5335	10.0992		10.7986	11.2863	11.5335		9.47155	10.794	10.8163		0.051624	0	0.162226	0.350215
CNR1		60.6717	45.8078	57.7151	61.2864	19.5592			2.81679	39.7376	42.4918	32.1014		7.786	7.527	8	8.018	8.128			5.234	7.975	8.039	7.166		9.56899	9.18794	9.76129	9.80536	9.41935			5.68376	9.5742	9.66731	8.67252		9.80536	9.5742	9.66731		9.54859	7.62898	9.16991		0.942649	0.850198	0.989306	1
CNR2		28.8949	21.5016	41.1022	44.1141	17.4797				1.49953				9.43	9.512	8.873	9.277	9.449				7.2				10.8908	10.8445	10.4869	10.9216	10.6915				7.37596				10.9216	7.37596			10.7671	7.37596			0.991326	0.978253	0.877395	1
CRFR1	39.0845	3.13651	6.23722		6.31675	18.576				16.0262	86.2295	51.5293	7.814	7.742	7.495		7.898	7.082				6.994	8.622	8.807	9.406	8.23845	8.28999		8.69849	8.35095				8.19883	10.5577	10.5191	9.406	8.69849	8.19883	10.5577	9.406	8.39447	8.19883	10.5384	0.511769	0.0167945	0.0386461		0.211827
CRFR2	87.7526	47.909	30.1052	42.7151	53.1149	21.1282			1.45872	67.9663			10.35	8.196	8.28	8.327	8.367	8.199			7.727	8.77			12.2933	9.87642	9.75864	9.95758	10.0922	9.52386			7.89097	10.6023			12.2933	10.0922	10.6023		12.2933	9.84174	9.24663		1	0.451003	0.42425	0.46944	0.500023
CXCR2		49.4258	35.466	49.2742	54.2071	49.594				47.9663				9.695	9.929	9.825	9.985	9.366				8.5				11.389	11.4788	11.5176	11.7191	11.0614				10.1809				11.7191	10.1809			11.4332	10.1809			0.785386	0.843806	0.869037	1
CXCR4		38.1257	29.5647	37.5	38.835	33.8457								8.703	9.156	8.663	8.735	8.383								10.2842	10.6268	10.237	10.3242	9.9125								10.6268				10.2769				0.520411	1	0.454349	0.57642
CXCR5		88.2232	100	66.3441	100	60.3248								7.786	7.775	8.366	8.431	8.717								9.73158	9.775	10.1878	10.431	10.4975								10.4975				10.1246				0	0.0566869	0.595654	0.913181
DRD1	65.0949				31.6545	50.8701				60.2905			8.81				5.604	5.986				7.657			10.6235				7.10444	7.69246				9.43725			10.6235	7.69246	9.43725		10.6235	7.39845	9.43725		1				0
DRD2		75.8072	55.9305	65.0269	67.4353	41.0673								8.144	7.916	8.617	9.074	8.239								10.0237	9.66365	10.4301	10.9029	9.8525								10.9029				10.1746				0.290551	0	0.61848	1
DRD5	76.24	2.22644	2.82939		19.7168					72.4742			8.56	6.751	6.293		6.847					7.854			10.4422	7.09861	6.74469		8.14184					9.71418			10.4422	8.14184	9.71418		10.4422	7.32838	9.71418		1	0.0957183	0		0.377863
EDNRA	35.3184	90.6176	56.544	100	93.7702	80.9165	66.0302	74.8293	83.8005	36.4199	60.2541	55.7066	8.573	9.373	9.65	9.76	9.944	10.46	9.815	9.677	9.752	8.642	11.33	9.808	10.121	11.3302	11.4024	11.76	11.9161	12.368	11.6347	11.5511	11.6752	10.2033	13.11	11.5539	10.121	12.368	11.6752	13.11	10.121	11.7553	11.2661	12.3319	0	0.404556	0.428702	0.548346	0.60056
FFAR2		49.5883	36.6345				60.3418	30.1742	8.43956					4.583	4.65				4.095	4.473	5.201					6.27838	6.21389				5.87562	5.95264	6.12732					6.27838	6.12732			6.24613	5.98519			1	0.839884
FFAR3		39.6966	35.0862	38.4677	41.0801	45.4466					55.2705	66.7233		5.25	5.523	5.655	5.629	5.173					5.303	4.034		6.84875	7.06814	7.2401	7.24263	6.8305					7.04549	5.85828		7.24263		7.04549		7.04602		6.45189		0.715479	0.873952	0.998169	1
FFAR4		3.78873	3.40491	17.2097	6.11853		26.4254	33.8827	32.161	44.5642		16.9782		6.122	6.311	5.598	6.266		5.097	5.075	5.505	5.533		4.801		6.70049	6.84311	6.83377	7.05265		6.51902	6.60498	7.01233	7.18199		6.03089		7.05265	7.18199	6.03089		6.8575	6.82958	6.03089		0.581709	0.705601	0.697494	0.887638
GHSR		21.6901	15.1183	31.7473	39.644	38.6311	16.5576	5.53332	29.4449	11.5276	50.7377	22.614		8.582	8.614	8.795	8.834	9.087	9.282	9.6	8.897	9.217	10.38	9.029		9.91826	9.7935	10.2967	10.4322	10.6739	10.501	10.343	10.366	10.2787	12.0853	10.3834		10.6739	10.501	12.0853		10.2229	10.3722	11.2344		0.0544364	0	0.219564	0.278675
GIPR	83.3895	19.6641	29.3456	32.8226	53.9442	38.6311				55.089			10.47	8.868	9.052	9.082	9.217	9.29				9.086			12.3911	10.1617	10.5195	10.5982	10.9489	10.8769				10.8271			12.3911	10.9489	10.8271		12.3911	10.6211	10.8271		1	0	0.16052	0.195788	0.353125
GLP1R	92.2841	4.96641	2.73152	24.4516	35.0121	7.27088				43.074		12.5573	10.62	8.345	8.426	8.516	8.843	10.22				8.577		8.462	12.5851	9.04104	8.8624	9.90431	10.3872	11.0816				10.2112		9.5609	12.5851	11.0816	10.2112	9.5609	12.5851	9.85531	10.2112	9.5609	1	0.0479859	0	0.279877	0.409596
GLP2R	96.9228	11.7443	6.85656	38.871	39.5833	13.6804				23.1303			10.1	8.686	8.622	9.235	9.198	9.033				8.24			12.0864	9.75583	9.45811	10.8246	10.7955	10.1691				9.60418			12.0864	10.8246	9.60418		12.0864	10.2006	9.60418		1	0.113274	0	0.519921	0.508845
GLR	71.0196	61.1918	47.3561	56.5591	77.2249	56.7285	12.0016	6.31269	6.30559	56.8041		24.8372	11.1	8.154	8.074	8.845	9.022	8.612	7.324	7.469	7.424	9.122		7.847	12.9514	9.94069	9.74938	10.5975	10.9098	10.3658	8.40324	8.26921	8.22373	10.8764		9.2421	12.9514	10.9098	10.8764	9.2421	12.9514	10.3126	8.94314	9.2421	1	0.363175	0.322708	0.502105	0.568153
GNRHR							37.722	46.0089	20.474	24.8079									9.474	9.296	8.96	8.939									11.0506	10.9588	10.2712	10.3336					11.0506				10.6536
GP183		14.4854	21.005	44.5699	38.4911	35.5568				3.56888	43.7951			9.745	9.754	9.159	9.747	9.157				8.508	8.981			10.9059	11.0763	10.808	11.3324	10.7079				9.06053	10.6224			11.3324	9.06053	10.6224		10.9661	9.06053	10.6224		0.812296	0.887299	0.769208	1
GPBAR	100												5.914												7.914												7.914				7.914
GPR39		27.5081	11.8127	36.7473	39.8058		15.1021	15.9642	22.7248	3.52858		16.964		4.097	4.194	4.158	4.247		4.476	4.215	4.255	4.38		5.391		5.53646	5.26635	5.72323	5.84695		5.65504	5.41815	5.6115	4.9276		6.62053		5.84695	5.65504	6.62053		5.59325	5.40307	6.62053		0.359649	0.200097	0.46997	0.543051
GPR4	67.7281	12.6869	12.0523				20.3098	19.3666	6.63132	10.3749			7.913	5.152	5.23				6.728	6.642	6.259	6.591			9.74377	6.25536	6.31107				8.03571	7.92905	7.0806	7.60698			9.74377	6.31107	8.03571		9.74377	6.28321	7.66309		1	0	0.0159713
GPR84		16.1105	15.4689	23.3468		11.308								4.126	4.019	2.662		5.175								5.33311	5.20846	4.03023		6.22839								6.22839				5.20005				0.592715	0.536009	0
GRM2		45.3846	23.1522	24.9516	16.9316	15.4872				61.7807				5.412	5.357	5.965	6.085	5.5				4.985				7.06891	6.72159	7.3621	7.3137	6.68997				6.77585				7.3621	6.77585			7.03125	6.77585			0.563786	0.0470424	1	0.92799
GRM4		10.0964		18.164	28.3374									4.58		5.252	4.843									5.58417		6.51121	6.29536									6.51121				6.13025				0		1	0.767162
GRM5		53.3153	35.3053	42.7419	46.5413	33.4977	21.8988	30.7276	26.9451	46.2324				5.561	5.585	5.756	5.507	5.599	6.343	6.199	5.506	6.166				7.28785	7.13284	7.38685	7.17484	7.12401	7.68342	7.68653	6.93648	7.83095				7.38685	7.83095			7.22128	7.53434			0.392828	0.219527	0.503511	0.26648
GRM6		37.1506	32.4715	27.6882	31.25	30.5394								4.659	4.463	5.285	5.272	4.572								6.22897	5.9745	6.72729	6.76685	6.05686								6.76685				6.35089				0.321151	0	0.950078	1
GRM8		46.208	28.586	19.0511	17.1359	37.239								5.596	5.519	6.067	5.993	5.493								7.26072	6.97515	7.34692	7.22691	7.064								7.34692				7.17474				0.768128	0	1	0.677184
HCAR2		16.013	18.3027	37.5269	35.0121	41.2993						17.4172		7.738	7.556	7.348	7.364	7.233						6.453		8.94247	8.81851	8.92234	8.90822	8.84894						7.69398		8.94247		7.69398		8.8881		7.69398		1	0.900714	0.983876	0.972564
HCAR3		44.9946	27.7973	50.3763	64.1383	51.5371						13.8658		5.634	5.714	5.503	5.448	5.247						4.077		7.28716	7.158	7.20523	7.25512	6.95912						5.21894		7.28716		5.21894		7.17293		5.21894		1	0.937551	0.960384	0.984507
HRH1	49.4182	100	66.8858	86.9086	98.5639	100	63.0792	62.7973	46.1205	34.6017	59.3607	54.1206	5.816	6.407	6.384	6.416	6.366	7.193	7.872	8.024	8.156	8.604	6.782	5.719	7.50989	8.407	8.20933	8.35506	8.35972	9.193	9.67189	9.82194	9.81989	10.1431	8.5555	7.45236	7.50989	9.193	10.1431	8.5555	7.50989	8.50482	9.8642	8.00393	0.0213787	0.354787	0.281325	0.335485	0.337215
HRH2	79.2866			4.97043	9.37702	23.2251				64.6017	62.7377	27.8108	7.109			5.73	5.357	4.254				6.693	5	4.986	9.0082			6.42639	6.32906	5.61996				8.50324	6.79753	6.43021	9.0082	6.42639	8.50324	6.79753	9.0082	6.12514	8.50324	6.61387	1			0.23801	0.209285
LPAR1		14.0845		28.4677			5.30378	5.18601	11.0378	28.9316		26.7913		9.197		8.887			7.515	6.921	5.629	6.308		8.354		10.3457		10.3414			8.23959	7.63583	6.67188	7.76937		9.78199		10.3457	8.23959	9.78199		10.3435	7.57917	9.78199		1		0.998805
LPAR2		33.922	50.336	54.7312	49.7573	13.1903	40.0187	47.6807	36.219	45.9888		10.8709		8.432	8.476	8.342	9.029	8.498	7.277	7.053	7.354	6.479		9.146		9.96248	10.1779	10.0802	10.7259	9.61825	8.87926	8.73134	8.91294	8.14165		10.1823		10.7259	8.91294	10.1823		10.1129	8.6663	10.1823		0.7046	0.787951	0.750166	1
LT4R1		81.1051	60.4879	56.0484	74.2314	57.1346	10.0654	7.9562	43.2529	68.3786	62.6066	34.1405		10.06	10.34	10.18	10.47	9.847	7.088	6.561	6.97	9.887	9.519	9.027		11.969	12.1217	11.9286	12.3406	11.6039	8.09083	7.46171	8.60602	11.7219	11.3156	10.5603		12.3406	11.7219	11.3156		11.9928	8.97012	10.9379		0.923847	0.955129	0.915549	1
LT4R2		45.6013	36.6053	55.4032	60.5785	30.6555								8.746	8.81	8.407	8.658	7.339								10.405	10.3735	10.1505	10.4403	8.82551								10.4403				10.039				0.978114	0.958649	0.820547	1
MC3R	88.9467				7.06917	36.2239				54.9672	41.623	27.032	9.556				8.303	8.638				10.59	7.457	6.747	11.5051				9.15237	10.197				12.3301	9.07633	8.17888	11.5051	10.197	12.3301	9.07633	11.5051	9.67468	12.3301	8.62761	0.80127				0.234507
MC4R	55.4042					4.04872				64.0862		10.1345	8.198					7.54				8.252		5.725	9.94154					8.14732				10.0588		6.7308	9.94154	8.14732	10.0588	6.7308	9.94154	8.14732	10.0588	6.7308	0.964777
MTR1A		24.4854	17.5139	24.7151	20.9142					66.1575				10.72	10.91	10.9	10.99					9.196				12.1089	12.1534	12.293	12.3104					11.0166				12.3104	11.0166			12.2164	11.0166			0.844238	0.878612	0.98649	1
MTR1B		25.5038	22.7724	24.9247	30.7039					1.57919				9.428	9.432	9.025	9.371					8.5				10.8346	10.7894	10.4216	10.8582					8.69844				10.8582	8.69844			10.726	8.69844			0.989078	0.968152	0.797865	1
NPFF1		75.4063	61.4081	68.9516	93.4061	43.1845				49.672	80.7705	58.0997		8.047	8.12	8.777	9.136	10.15				7.4	6.915	6.69		9.92441	9.90823	10.6155	11.1064	11.7853				9.09611	8.82225	8.45417		11.7853	9.09611	8.82225		10.668	9.09611	8.63821		0.441359	0.436501	0.648835	0.796181
NPFF2		24.0953	15.1767	30.2419	41.343	37.384								7.13	7.267	7.767	8.143	8.57								8.51193	8.44818	9.24761	9.7594	10.1427								10.1427				9.22196				0.0376242	0	0.471778	0.773808
NPY1R		32.4919	27.2568	22.2742	38.9563	45.3596								9.459	9.426	9.291	9.582	10.04								10.9708	10.8615	10.6388	11.1726	11.6967								11.6967				11.0681				0.313813	0.210492	0	0.504577
NPY5R				15.6344	11.2621	9.36775										8.129	8.078	7.817										9.32308	9.12962	8.78864								9.32308				9.08045						1	0.638017
OGR1	68.7079	63.0553	66.3307	79.543	86.4684		100	100	94.2106	41.8369	51.9344	9.28491	6.508	6.563	6.633	7.173	7.41		7.401	7.346	7.199	6.493	7.706	8.24	8.34501	8.36272	8.45471	9.0736	9.34686		9.401	9.346	9.1731	8.11456	9.42146	9.20778	8.34501	9.34686	9.401	9.42146	8.34501	8.80947	9.00866	9.31462	0.176332	0.189886	0.260277	0.733832	0.94292
OPRD		60.6609	40.4324	50.2419	50.627	28.2802			3.61325	27.8538		4.9561		9.171	9.113	9.514	9.841	10.3			6.85	7.24		6		10.9539	10.7197	11.2151	11.5454	11.7515			7.4079	8.68488		6.69514		11.7515	8.68488	6.69514		11.2371	8.04639	6.69514		0.842263	0.795949	0.893912	0.959239
OPRK		75.4713	43.7482	60.1882	60.0728	9.48956				16.4574				10.16	10.22	10.36	10.65	11.25				8.264				12.0378	11.861	12.1395	12.4287	12.2272				9.48036				12.4287	9.48036			12.1388	9.48036			0.867417	0.807443	0.901921	1
OPRM		72.8494	55.3462	60.6989	67.2128	22.2651				22.0337				8.33	8.443	8.754	9.002	9.987				6.36				10.1924	10.1861	10.5372	10.8295	11.3346				7.70309				11.3346	7.70309			10.616	7.70309			0.685478	0.683733	0.780412	0.860893
OPRX		69.2958	39.1031	57.3387	62.7832	69.6056			17.4981	68.7816				10.24	10.13	10.41	10.82	11.37			8.226	9.246				12.0807	11.7222	12.1684	12.6178	13.2126			9.46899	11.0835				13.2126	11.0835			12.3604	10.2762			0.697638	0.601877	0.721076	0.841118
OX2R		14.6696	7.02016	32.2581	34.1222	41.9374	56.8167	68.8368	66.8759	37.0665	59.2869	42.7782		7.562	7.601	7.999	8.341	9.239	9.547	9.379	8.844	7.661	7.648	6.41		8.72842	8.44735	9.50764	9.87404	10.8616	11.3015	11.2168	10.6693	9.22998	9.42096	8.04122		10.8616	11.3015	9.42096		9.48381	10.6044	8.73109		0.210779	0.124568	0.449786	0.562169
OXYR							23.1807	31.0101	5.91494	17.9944									8.384	8.193	8.109	8.021									9.74913	9.6845	8.88095	9.27614					9.74913				9.39768
P2RY2		6.41387	3.78469	23.0403	11.0275	26.6183	3.89772	3.07747	2.89254	18.5286				6.285	6.538	5.943	6.368	6.035	6.402	6.434	6.286	6.076				7.09212	7.11603	7.30549	7.41048	7.46018	6.99281	6.92219	6.74728	7.34384				7.46018	7.34384			7.27686	7.00153			0.483714	0.517254	0.78301	0.93028
PAR1		62.156	25.8107	19.6317	44.7411	41.7633	31.7265	44.9258	43.8589	31.1621		27.386		3.999	5.04	5.886	6.003	6.412	6.721	6.547	5.744	6.221		7.107		5.79248	6.4518	7.17896	7.65371	8.0328	8.22242	8.1995	7.38606	7.71463		8.54453		8.0328	8.22242	8.54453		7.02195	7.88065	8.54453		0	0.239573	0.503798	0.676305
PAR2		67.2373	47.6483	58.3602	64.6642	54.4084	40.5261	56.899	45.3089	46.6542	34.0082	33.2909		5.316	5.646	5.851	6.321	6.226	5.179	5.957	5.464	5.807	7.788	6.867		7.14361	7.32405	7.61712	8.13166	7.96167	6.78673	7.7121	7.12018	7.47589	9.31958	8.38932		8.13166	7.7121	9.31958		7.63562	7.27373	8.85445		0.140899	0.212137	0.327845	0.530995
PE2R1		6.052	4.42448	11.6075	9.9373		32.0069	38.1681	17.0328	75.4733	66.5492	8.74965		6.43	7.366	8	7.46		8.321	8.274	7.946	9.293	9.514	8.037		7.2119	8.01186	9.06474	8.45727		9.82624	9.8557	9.17729	11.1708	11.3371	8.97899		9.06474	11.1708	11.3371		8.18644	10.0075	10.1581		0	0.193919	0.449147	0.30189
PE2R2	71.387					8.7558				8.75914	38.5574		9.455					6.428				6.622	6.378		11.3086					7.3703				7.56446	7.96411		11.3086	7.3703	7.56446	7.96411	11.3086	7.3703	7.56446	7.96411	1
PE2R3		53.4995	40.2863	63.4946	61.873	27.6015			2.33525	54.7142		53.795		9.708	9.646	9.741	9.598	10.44			6.961	7.713		8.293		11.4363	11.2512	11.5437	11.3895	11.8809			7.32933	9.4511		10.0237		11.8809	9.4511	10.0237		11.5003	8.39022	10.0237		0.902324	0.861636	0.925917	0.892031
PE2R4	72.1372	55.5905	36.0356		12.3807	25.7048				64.3861	61.9918	13.6859	10.61	9.158	8.885		8.217	8.253				8.868	9.635	8.734	12.4682	10.903	10.4417		9.30974	9.66301				10.6768	11.4273	9.87027	12.4682	10.903	10.6768	11.4273	12.4682	10.0794	10.6768	10.6488	1	0.504448	0.358404		0
PF2R				22.8011	23.1594	35.5278	40.8733	54.0499	62.4932	40.956	85.1639	25.9558				6.92	6.991	7.464	8.734	8.664	8.174	8.877	8.379	8.777				8.27796	8.35573	9.01457	10.3454	10.3968	9.96983	10.4893	10.3093	10.1912		9.01457	10.4893	10.3093		8.54942	10.3003	10.2502				0	0.0351691
PSYR	49.4489				17.5546							16.5817	6.998				6.305							7.896	8.69216				7.54939							9.11563	8.69216	7.54939		9.11563	8.69216	7.54939		9.11563	0.729624				0
PTH1R	60.1653	33.9112	21.6331	36.0484	60.7807	40.9513	43.3169	15.6346	11.2542	57.5258	46.459	50.6514	11.18	8.082	8.008	8.204	8.285	7.097	8.273	8.001	7.963	9.279	7.128	7.695	12.9593	9.61234	9.34312	9.76089	10.0688	8.70927	9.90966	9.19509	9.01431	11.0389	8.79507	9.39959	12.9593	10.0688	11.0389	9.39959	12.9593	9.49888	9.78948	9.09733	1	0.212484	0.149139	0.247435	0.319876
S1PR1		14.2687	14.5793	18.4005	11.9822					35.1546	75.3934	24.8088		8.151	7.949	7.748	8.164					6.208	7.182	6.861		9.30538	9.11274	9.01283	9.24254					7.75398	9.05933	8.25561		9.30538	7.75398	9.05933		9.16837	7.75398	8.65747		1	0.875824	0.811426	0.95949
SSR2		95.3521	47.1224	71.4516	90.8981	67.7204	17.479		52.6242	59.672	39.2131			10.21	10.41	10.1	10.52	11.26	7.5		7.833	8.176	8.267			12.1893	12.0832	11.954	12.4786	13.0907	8.74252		9.55419	9.95177	9.86043			13.0907	9.95177	9.86043		12.3592	9.41616	9.86043		0.792698	0.768297	0.73858	0.859214
V1AR		10.6046	8.51008	15.3414	10.6068	26.9664	82.2006	96.2444	90.0119	79.7844				7.805	7.907	8.131	8.053	7.996	8.779	8.826	8.187	8.01				8.83049	8.83693	9.31686	9.07858	9.42682	10.6939	10.8094	10.1413	9.91192				9.42682	10.8094			9.09794	10.3891			0	0.00325503	0.245781	0.12537
V2R	65.493	3.35861	2.92141				16.3306	24.5585	7.95801	71.94		22.8122	10.24	7.545	6.788				7.87	7.776	7.694	9.028		8.409	12.0562	8.07116	7.25359				9.083	9.1662	8.5948	10.885		9.76717	12.0562	8.07116	10.885	9.76717	12.0562	7.66238	9.43224	9.76717	1	0.170234	0
VIPR1	73.6375	20.4767	13.9936	15.1452	32.9288	25.6148	34.771	18.1069	4.98214	57.2352	34.0738	45.7661	11.32	8.24	8.567	8.372	8.704	8.202	8.551	8.107	7.887	9.724	8.593	8.441	13.1871	9.55126	9.71293	9.55227	10.2216	9.61049	10.0922	9.36484	8.58442	11.4817	10.1254	10.1015	13.1871	10.2216	11.4817	10.1254	13.1871	9.72971	9.88079	10.1135	1	0.210061	0.245186	0.210281	0.355697
	Emax min-max normalized												pEC50												Log(Emax/EC50)												FAM-Log(Emax/EC50)				FAM-Log(Emax/EC50)				Log(Emax/EC50)-gn
[truncated: 15 more columns]

## Sheet: I-LogEmaxOverpEC50
Receptor (UniProt)	I-Emax Min Max Gs	I-Emax Min Max Golf	I-Emax Min Max Gi1	I-Emax Min Max Gi2	I-Emax Min Max Gi3	I-Emax Min Max GoA	I-Emax Min Max GoB	I-Emax Min Max Gz	I-Emax Min Max Gq	I-Emax Min Max G11	I-Emax Min Max G14	I-Emax Min Max G15	I-Emax Min Max G12	I-Emax Min Max G13	I-pEC50 >1.4SD Gs	I-pEC50 >1.4SD Golf	I-pEC50 >1.4SD Gi1	I-pEC50 >1.4SD Gi2	I-pEC50 >1.4SD Gi3	I-pEC50 >1.4SD GoA	I-pEC50 >1.4SD GoB	I-pEC50 >1.4SD Gz	I-pEC50 >1.4SD Gq	I-pEC50 >1.4SD G11	I-pEC50 >1.4SD G14	I-pEC50 >1.4SD G15	I-pEC50 >1.4SD G12	I-pEC50 >1.4SD G13	I-Gs-Log EmEC	I-Golf-Log EmEC	I-Gi1-Log EmEC	I-Gi2-Log EmEC	I-Gi3-Log EmEC	I-GoA-Log EmEC	I-GoB-Log EmEC	I-Gz-Log EmEC	I-Gq-Log EmEC	I-G11-Log EmEC	I-G14-Log EmEC	I-G15-Log EmEC	I-G12-Log EmEC	I-G13-Log EmEC	I-Gs/olf-Log EmEC-MAX	I-Gi/o-Log EmEC-MAX	I-Gq/11-Log EmEC-MAX	I-G12/13-Log EmEC-MAX	I-Gs/olf-Log EmEC-AVG	I-Gi/o-Log EmEC-AVG	I-Gq/11-Log EmEC-AVG
5HT1A	23.7132	20.0743	46.8085	46.8085	40.8624	50.1035	50.1035	37.6812	43.5318	43.5318	44.0449	29.3886	27.619	22.9249	5.88	5.9	6.35	6.35	6.96	6.5	6.5	6.19	6.08	6.08	7.07	5.92	5.88	5.83	7.25499	7.20264	8.02032	8.02032	8.57132	8.19987	8.19987	7.76612	7.71881	7.71881	8.7139	7.38818	7.32121	7.19031	7.25499	8.57132	8.7139	7.32121	7.25499	8.12964	7.88492
5HT1B			27.6596	27.6596	27.5154	23.3954	23.3954	30.1449	12.9363	12.9363	26.7416		11.0476				7.55	7.55	7.95	7.23	7.23	7.44	7.1	7.1	7.39		7.08				8.99185	8.99185	9.38958	8.59913	8.59913	8.91921	8.21181	8.21181	8.81719		8.12327			9.38958	8.81719	8.12327		8.91512	8.4136
5HT1D			27.0793	27.0793	19.3018	38.7164	38.7164	36.2319	18.8912	18.8912	36.4045						8.84	8.84	8.98	8.65	8.65	8.64	7.8	7.8	8.27						10.2726	10.2726	10.2656	10.2379	10.2379	10.1991	9.07626	9.07626	9.83116					10.2726	9.83116			10.2476	9.32789
5HT1E			18.7621	18.7621	26.4887	17.3913	17.3913	18.5507									7.36	7.36	7.63	7.47	7.47	7.26									8.63328	8.63328	9.05306	8.71033	8.71033	8.52836								9.05306				8.71144
5HT1F			18.1818	18.1818	29.7741												7.2	7.2	7.38												8.45964	8.45964	8.85384											8.85384				8.59104
5HT2A	23.3456	24.9071	34.236	34.236	25.0513	43.8923	43.8923	40	20.5339	20.5339	22.4719	43.787	38.0952	39.3281	6.16	6.14	7.56	7.56	8.19	6.89	6.89	7.87	8.17	8.17	8.49	7.01	6.3	6.37	7.5282	7.53632	9.09448	9.09448	9.58883	8.53239	8.53239	9.47206	9.48247	9.48247	9.84164	8.65135	7.88087	7.9647	7.5282	9.58883	9.84164	7.9647	7.5282	9.05244	9.36448
5HT2B	10.6618		23.5977	23.5977	29.7741	23.6025	23.6025	35.942	23.2033	23.2033	26.0674	6.90335		8.3004	7.17		7.68	7.68	7.76	7.45	7.45	8.35	8.58	8.58	8.51	7.61		7.34	8.19783		9.05287	9.05287	9.23384	8.82296	8.82296	9.9056	9.94555	9.94555	9.9261	8.44906		8.2591	8.19783	9.9056	9.94555	8.2591	8.19783	9.14852	9.56656
5HT2C	32.5368	29.368	14.1199	14.1199		23.8095	23.8095	15.942	10.883	10.883	10.1124	36.6864	34.6667	37.5494	6.84	6.74	8.75	8.75		8.57	8.57	8.97	8.64	8.64	8.85	8.31	7.85	7.81	8.35237	8.20787	9.89983	9.89983		9.94675	9.94675	10.1725	9.67675	9.67675	9.85485	9.8745	9.38991	9.3846	8.35237	10.1725	9.8745	9.38991	8.35237	9.97314	9.77071
5HT4R	44.6691	43.4944	41.7795	41.7795	39.4251	42.8571	42.8571	37.6812	40.0411	40.0411	38.8764	32.7416	36.9524	33.2016	6.98	6.91	7.63	7.63	7.69	7.32	7.32	7.7	7.21	7.21	7.48	6.62	6.69	6.7	8.63001	8.54843	9.25096	9.25096	9.28577	8.95202	8.95202	9.27612	8.81251	8.81251	9.06969	8.1351	8.25764	8.22116	8.63001	9.28577	9.06969	8.25764	8.63001	9.16131	8.70745
5HT6R	41.5441	44.052						40.2899						36.5613	6.79	6.72						6.63						6.51	8.40851	8.36397						8.2352						8.07302	8.40851	8.2352		8.07302	8.40851	8.2352
5HT7R	34.9265	31.9703	12.3791	12.3791	16.4271	21.118	21.118	24.058	25.462	25.462	31.4607	14.3984	14.4762	22.7273	8.74	8.79	8.87	8.87	8.89	8.87	8.87	8.98	8.74	8.74	8.94	8.83	8.98	8.95	10.2832	10.2947	9.96269	9.96269	10.1056	10.1947	10.1947	10.3613	10.1459	10.1459	10.4378	9.98831	10.1407	10.3065	10.2832	10.3613	10.4378	10.3065	10.2832	10.1303	10.1795
AA1R	25	16.5428				34.9896	34.9896	47.5362	38.3984	38.3984	50.5618	53.4517	44		5.33	5.33				7.54	7.54	7.44	5.74	5.74	6.06	6.2	5.7		6.72794	6.54861				9.08394	9.08394	9.11702	7.32431	7.32431	7.76382	7.92796	7.34345		6.72794	9.11702	7.92796	7.34345	6.72794	9.09497	7.5851
AA2AR	25.7353	17.1004	17.795	17.795	15.8111	26.087	26.087	27.2464	14.5791	14.5791	14.382				6.34	6.55	6.33	6.33	6.49	6.44	6.44	6.45	6.49	6.49	6.64				7.75053	7.78301	7.5803	7.5803	7.68896	7.85642	7.85642	7.88531	7.65373	7.65373	7.79782				7.75053	7.88531	7.79782		7.75053	7.74129	7.70176
AA2BR	63.4191	57.2491	59.5745	59.5745	63.8604	68.7371	68.7371	59.7101	46.2012	46.2012	61.573		30.2857	41.1067	5.77	5.55	5.71	5.71	5.81	5.92	5.92	5.65	5.36	5.36	5.87		4.84	5.04	7.57222	7.30777	7.48506	7.48506	7.61523	7.75719	7.75719	7.42605	7.02465	7.02465	7.65939		6.32124	6.65391	7.57222	7.75719	7.65939	6.65391	7.57222	7.58763	7.23623
AA3R			60.1547	60.1547	58.1109	33.3333	33.3333	14.4928									6.61	6.61	6.81	5.54	5.54	5.28									8.38927	8.38927	8.57426	7.06288	7.06288	6.44115								8.57426				7.65328
ACM1	96.6912	91.4498	89.3617	89.3617	81.5195	90.2692	90.2692	86.6667	79.4661	79.4661	77.7528	93.2939	83.619	68.7747	6.5	6.4	7.25	7.25	7.59	6.66	6.66	6.97	7.93	7.93	7.8	6.42	5.86	5.41	8.48539	8.36118	9.20115	9.20115	9.50126	8.61554	8.61554	8.90785	9.83018	9.83018	9.69072	8.38985	7.78231	7.24743	8.48539	9.50126	9.83018	7.78231	8.48539	9.00708	9.43523
ACM2	46.3235	39.5911	84.7195	84.7195	73.306	81.3665	81.3665	76.2319	75.77	75.77	75.0562	52.071	41.7143	31.2253	5.26	5.2	7.66	7.66	7.93	7.26	7.26	6.49	6.18	6.18	6.13	5.38	5.29	5.24	6.9258	6.7976	9.58798	9.58798	9.79514	9.17045	9.17045	8.37214	8.0595	8.0595	8.00539	7.0966	6.91028	6.73451	6.9258	9.79514	8.0595	6.91028	6.9258	9.28069	7.80524
ACM3	87.5	88.6617	83.559	83.559	68.3778	87.5776	87.5776	86.6667	58.5216	58.5216	65.3933	87.3767	85.1429	79.4466	7.07	7.05	8.08	8.08	8.38	7.4	7.4	7.65	8.66	8.66	8.5	7.71	7.07	6.52	9.01201	8.99774	10.002	10.002	10.2149	9.34239	9.34239	9.58785	10.4273	10.4273	10.3155	9.6514	9.00015	8.42008	9.01201	10.2149	10.4273	9.00015	9.01201	9.74859	10.2054
ACM4	41.1765		68.2785	68.2785	67.9671	77.8468	77.8468	64.3478	59.7536	59.7536	61.573	50.0986	32.1905	23.913	5.76		7.77	7.77	8.01	7.47	7.47	6.91	6.52	6.52	6.61	5.9	5.85	5.81	7.37465		9.60428	9.60428	9.8423	9.36124	9.36124	8.71853	8.29636	8.29636	8.39939	7.59983	7.35773	7.18863	7.37465	9.8423	8.39939	7.35773	7.37465	9.41531	8.14799
ACM5	89.1544	95.3532	69.6325	69.6325	49.8973	89.8551	89.8551	89.5652	57.2895	57.2895	56.6292	86.1933	89.9048	90.1186	7.5	7.42	8.48	8.48	8.68	7.7	7.7	7.93	8.68	8.68	8.64	8.09	7.42	6.67	9.45014	9.39934	10.3228	10.3228	10.3781	9.65354	9.65354	9.88214	10.4381	10.4381	10.393	10.0255	9.37378	8.62481	9.45014	10.3781	10.4381	9.37378	9.45014	10.0355	10.3237
ADA1A	68.0147	70.2602	81.4313	81.4313	83.1622	79.9172	79.9172	78.5507	71.6632	71.6632	68.0899	81.4596	75.619	81.2253	8.57	8.44	7.1	7.1	7.16	6.71	6.71	6.87	8.45	8.45	8.68	6.72	6.61	7.59	10.4026	10.2867	9.01079	9.01079	9.07993	8.61264	8.61264	8.76515	10.3053	10.3053	10.5131	8.63094	8.48863	9.49969	10.4026	9.07993	10.5131	9.49969	10.4026	8.84866	9.93865
ADA1B	85.1103	84.5725	44.4874	44.4874	35.1129	36.646	36.646	47.5362	83.9836	83.9836	86.9663	50.8876	19.2381	50.9881	7.75	7.46	5.99	5.99	6.04	5.92	5.92	5.99	7.46	7.46	7.63	6.04	6.02	6.21	9.67998	9.38723	7.63824	7.63824	7.58547	7.48403	7.48403	7.66702	9.38419	9.38419	9.56935	7.74661	7.30416	7.91747	9.67998	7.66702	9.56935	7.91747	9.67998	7.58284	9.02109
ADA1D	39.8897	29.1822							30.5955	30.5955	45.618				6.75	6.75							6.94	6.94	6.86				8.35086	8.21512							8.42566	8.42566	8.51914				8.35086		8.51914		8.35086		8.45682
ADA2A	40.0735	34.3866	80.0774	80.0774	78.8501	80.9524	80.9524	84.3478	66.7351	66.7351	64.7191	81.2623	76.5714	76.087	5.79	5.5	8.07	8.07	8.42	7.73	7.73	8.5	6.08	6.08	6.19	6.31	6.44	6.37	7.39286	7.03639	9.97351	9.97351	10.3168	9.63823	9.63823	10.4261	7.90435	7.90435	8.00103	8.21989	8.32407	8.25131	7.39286	10.4261	8.21989	8.32407	7.39286	9.99439	8.00741
ADA2B	50.9191	36.803	73.1141	73.1141	66.3244	75.9834	75.9834	70.1449	54.0041	54.0041	64.2697	48.1262	72.1905	66.6008	6.61	6.41	8.14	8.14	8.4	8.1	8.1	8.02	6.86	6.86	7.24	6.58	7.65	7.23	8.31688	7.97588	10.004	10.004	10.2217	9.98072	9.98072	9.866	8.59243	8.59243	9.04801	8.26238	9.50848	9.05348	8.31688	10.2217	9.04801	9.50848	8.31688	10.0095	8.62381
ADA2C			55.1257	55.1257	59.5483	40.9938	40.9938	77.6812			24.2697						7.17	7.17	7.21	6.86	6.86	7.44			6.34						8.91135	8.91135	8.98487	8.47272	8.47272	9.33032			7.72506					9.33032	7.72506			8.84722	7.72506
ADRB1	69.3015	64.8699	27.4662	27.4662	28.3368	21.9462	21.9462	15.6522	51.9507	51.9507	71.0112			12.253	8.08	7.91	7.2	7.2	7.2	7.09	7.09	7.28	7.39	7.39	8.31			7.19	9.92074	9.72204	8.6388	8.6388	8.65235	8.43136	8.43136	8.47457	9.10559	9.10559	10.1613			8.27824	9.92074	8.65235	10.1613	8.27824	9.92074	8.54454	9.4575
ADRB2	33.6397	27.3234									33.7079				7.41	7.3									7.53				8.93685	8.73654									9.05773				8.93685		9.05773		8.93685		9.05773
ADRB3	43.75	43.6803													5.43	5.16													7.07098	6.80029													7.07098				7.07098
AGTR1	51.2868	49.6283	75.2418	75.2418	70.2259	50.1035	50.1035	24.9275	66.9405	66.9405	72.809	77.712	69.5238	59.0909	9.15	9.13	10.01	10.01	10.51	9	9	8.7	10.48	10.48	10.37	10.44	9.45	9.28	10.86	10.8257	11.8865	11.8865	12.3565	10.6999	10.6999	10.0967	12.3057	12.3057	12.2322	12.3305	11.2921	11.0515	10.86	12.3565	12.3305	11.2921	10.86	11.271	12.2935
APJ			62.6692	62.6692	59.3429	31.677	31.677	19.7101	16.4271	16.4271			12.381				7.8	7.8	7.8	7	7	7.01	7.31	7.31			6.58				9.59705	9.59705	9.57337	8.50074	8.50074	8.30469	8.52556	8.52556			7.67275			9.59705	8.52556	7.67275		9.01228	8.52556
BKRB1	37.5	37.7323	38.4913	38.4913	28.1314	48.0331	48.0331	31.3043			17.9775	39.0533	37.5238	42.8854	7.79	7.68	8.26	8.26	8.38	8.12	8.12	7.45			8.52	8.18	7.73	8	9.36403	9.25671	9.84536	9.84536	9.82919	9.80154	9.80154	8.9456			9.77473	9.77166	9.30431	9.63231	9.36403	9.84536	9.77473	9.63231	9.36403	9.6781	9.77319
BKRB2	56.8015	47.9554	77.7563	77.7563	61.3963	79.2961	79.2961	71.5942	63.2444	63.2444	66.0674	83.432	77.3333	76.2846	8.48	8.24	9.93	9.93	10.36	9.5	9.5	8.73	10.32	10.32	10.3	10.01	9.33	9.55	10.2344	9.92084	11.8207	11.8207	12.1481	11.3993	11.3993	10.5849	12.121	12.121	12.12	11.9313	11.2184	11.4324	10.2344	12.1481	12.121	11.4324	10.2344	11.5288	12.0733
CCKAR	100	100	100	100	96.3039	100	100	98.5507	96.9199	96.9199	100	99.6055	100	94.664	10.44	10.43	10.85	10.85	10.99	10.22	10.22	9.83	10.83	10.83	11.12	10.28	10.39	10.04	12.44	12.43	12.85	12.85	12.9736	12.22	12.22	11.8237	12.8164	12.8164	13.12	12.2783	12.39	12.0162	12.44	12.9736	13.12	12.39	12.44	12.4896	12.7578
CLTR1	38.9706	28.8104	53.7718	53.7718	63.4497	32.7122	32.7122	20.2899	72.8953	72.8953	62.6966	55.6213	9.52381		8.34	8.35	8.58	8.58	8.93	8.41	8.41	8.35	9.41	9.41	9.32	8.82	8.29		9.93074	9.80955	10.3106	10.3106	10.7324	9.92471	9.92471	9.65728	11.2727	11.2727	11.1172	10.5652	9.26881		9.93074	10.7324	11.2727	9.26881	9.93074	10.1434	11.057
CLTR2			42.3598	42.3598	66.7351	40.1656	40.1656	52.4638	73.1006	73.1006	65.1685	39.2505	15.4286	31.2253			7.4	7.4	7.93	7.28	7.28	8.31	8.64	8.64	8.61	7.09	7.09	6.58			9.02695	9.02695	9.75435	8.88385	8.88385	10.0299	10.5039	10.5039	10.424	8.68385	8.27833	8.07451		10.0299	10.5039	8.27833		9.26764	10.0289
CNR1			21.6634	21.6634		21.9462	21.9462				18.2022		21.9048	20.1581			7.88	7.88		7.94	7.94				7.31		7.85	7.72			9.21573	9.21573		9.28136	9.28136				8.57013		9.19054	9.02445		9.28136	8.57013	9.19054		9.24854	8.57013
CNR2			31.3346	31.3346	28.7474	30.0207	30.0207	21.7391									8.16	8.16	8.2	7.95	7.95	7.86									9.65602	9.65602	9.6586	9.42742	9.42742	9.19724								9.6586				9.50379
DRD1	48.3456	47.5836			26.4887			32.4638	44.3532	44.3532	42.4719				5.61	5.47			5.36			5.7	5.37	5.37	5.7				7.29436	7.14746			6.78306			7.2114	7.01692	7.01692	7.3281				7.29436	7.2114	7.3281		7.29436	6.99723	7.12065
DRD2			64.4101	64.4101	62.0123	65.6315	65.6315	59.4203									7.96	7.96	8.2	7.75	7.75	7.78									9.76895	9.76895	9.99248	9.56711	9.56711	9.55393								9.99248				9.70309
DRD3			17.9884	17.9884	35.5236	20.4969	20.4969	35.942									7.67	7.67	8.18	7.71	7.71	8.07									8.92499	8.92499	9.73052	9.02169	9.02169	9.6256								9.73052				9.20825
DRD4			67.5048	67.5048	65.0924	62.94	62.94	71.0145									7.4	7.4	7.88	7.42	7.42	7.6									9.22933	9.22933	9.69353	9.21893	9.21893	9.45135								9.69353				9.34023
DRD5	32.5368	26.5799	17.0213	17.0213	23.4086	22.1532	22.1532	27.5362	24.4353	24.4353	33.0337				6.71	6.74	6.5	6.5	6.21	6.45	6.45	6.06	6.69	6.69	6.71				8.22237	8.16455	7.73099	7.73099	7.57938	7.79544	7.79544	7.4999	8.07802	8.07802	8.22896				8.22237	7.79544	8.22896		8.22237	7.68869	8.12833
EDNRA	88.2353	86.4312	92.0696	92.0696	93.0185	95.8592	95.8592	100	85.0103	85.0103	95.7303	96.4497	95.4286	94.664	9.84	9.66	10.43	10.43	10.35	9.87	9.87	10.26	10.39	10.39	10.5	9.81	10.4	9.94	11.7856	11.5967	12.3941	12.3941	12.3186	11.8516	11.8516	12.26	12.3195	12.3195	12.481	11.7943	12.3797	11.9162	11.7856	12.3941	12.481	12.3797	11.7856	12.1783	12.2286
EDNRB	67.6471	60.5948	82.0116	82.0116	78.0287	79.2961	79.2961	89.2754	60.9856	60.9856	67.191	83.0375	83.2381	79.0514	9.73	9.71	10.56	10.56	10.6	10.03	10.03	10.11	9.9	9.9	10.24	10.16	10.5	10.11	11.5602	11.4924	12.4739	12.4739	12.4923	11.9293	11.9293	12.0607	11.6852	11.6852	12.0673	12.0793	12.4203	12.0079	11.5602	12.4923	12.0793	12.4203	11.5602	12.2265	11.8793
FFAR1	49.2647	50.5576				33.5404	33.5404	26.3768				18.7377	24.1905	15.6126	4.87	4.88				5.09	5.09	4.66				4.49	4.66	4.65	6.56254	6.58379				6.61557	6.61557	6.08122				5.76272	6.04364	5.84348	6.56254	6.61557	5.76272	6.04364	6.56254	6.43745	5.76272
FFAR2	30.3309	30.855				29.1925	29.1925	28.9855	16.4271	16.4271		28.9941		12.6482	4.2	4.14				4.22	4.22	3.37	4.97	4.97		4.65		5.11	5.68189	5.62933				5.68527	5.68527	4.83218	6.18556	6.18556		6.11231		6.21203	5.68189	5.68527	6.18556	6.21203	5.68189	5.40091	6.16114
FFAR3			48.9362	48.9362	50.308	52.795	52.795	54.7826			20.6742	29.5858	57.9048	51.1858			4.52	4.52	4.37	4.08	4.08	3.92			3.91	3.3	3.88	4.08			6.20963	6.20963	6.07164	5.80259	5.80259	5.65864			5.22543	4.77108	5.64271	5.78915		6.20963	5.22543	5.78915		5.95912	4.99826
FFAR4	38.2353	41.4498	29.4004	29.4004	20.9446	45.1346	45.1346	31.0145	42.2998	42.2998	24.2697	38.4615	46.0952	45.4545	7.49	7.28	8.1	8.1	8.19	7.59	7.59	7.87	7.43	7.43	7.85	6.49	7.23	7.14	9.07246	8.89752	9.56835	9.56835	9.51107	9.24451	9.24451	9.36156	9.05634	9.05634	9.23506	8.07503	8.89366	8.79758	9.07246	9.56835	9.23506	8.89366	9.07246	9.41639	8.85569
FPR1			13.9265	13.9265	32.4435						18.6517						7.15	7.15	7.72						7.23						8.29384	8.29384	9.23113						8.50072					9.23113	8.50072			8.60627	8.50072
FPR2			45.0677	45.0677	75.3593	42.6501	42.6501	25.5072	22.1766	22.1766	78.8764	8.87574	10.8571	13.834			6.67	6.67	7.28	6.45	6.45	6.73	6.61	6.61	7.48	6.14	6.6	6.64			8.32387	8.32387	9.15714	8.07992	8.07992	8.13666	7.95589	7.95589	9.37695	7.0882	7.63572	7.78095		9.15714	9.37695	7.78095		8.35023	8.09424
GALR1	17.8309	12.4535	80.8511	80.8511	73.306	51.7598	51.7598	36.8116	41.4784	41.4784	43.5955	19.9211	24.5714	20.9486	6.92	7.04	8.04	8.04	8.47	7.8	7.8	7.42	7.27	7.27	7.26	6.9	7.27	7.11	8.17117	8.13529	9.94769	9.94769	10.3351	9.51399	9.51399	8.98598	8.88782	8.88782	8.89944	8.19931	8.66043	8.43116	8.17117	10.3351	8.89944	8.66043	8.17117	9.70741	8.7186
GALR2			41.9729	41.9729	50.924	31.677	31.677		51.54	51.54	51.9101	38.856	52.1905	36.9565			7.94	7.94	8.52	7.9	7.9		8.74	8.74	8.43	7.98	8.37	8.06			9.56297	9.56297	10.2269	9.40074	9.40074		10.4521	10.4521	10.1453	9.56946	10.0876	9.62769		10.2269	10.4521	10.0876		9.63087	10.1547
GALR3			14.5068	14.5068	30.1848	19.4617	19.4617	27.8261									6.32	6.32	6.34	6.43	6.43	6.34									7.48157	7.48157	7.81979	7.71918	7.71918	7.78445								7.81979				7.66762
GASR	72.2426	73.0483	78.53	78.53	75.77	65.8385	65.8385	52.7536	71.0472	71.0472	62.9213	63.9053	74.2857	69.7628	9.98	9.94	10.09	10.09	10.34	9.58	9.58	9.46	10.48	10.48	10.63	9.64	9.74	9.68	11.8388	11.8036	11.985	11.985	12.2195	11.3985	11.3985	11.1823	12.3315	12.3315	12.4288	11.4455	11.6109	11.5236	11.8388	12.2195	12.4288	11.6109	11.8388	11.6948	12.1344
GHSR	44.1176	33.829	18.5687	18.5687	21.9713	46.3768	46.3768	53.6232	11.0883	11.0883	45.618	58.3826	45.9048	41.6996	9.85	9.82	9.94	9.94	10.24	10.04	10.04	9.87	10.44	10.44	10.3	10.02	10.06	10.08	11.4946	11.3493	11.2088	11.2088	11.5819	11.7063	11.7063	11.5994	11.4849	11.4849	11.9591	11.7863	11.7219	11.7001	11.4946	11.7063	11.9591	11.7219	11.4946	11.5019	11.6788
GIPR	57.9044	57.2491													8.48	8.38													10.2427	10.1378													10.2427				10.2427
GNRHR	55.8824	54.6468	36.3636	36.3636	52.1561	21.9462	21.9462	36.5217	57.9055	57.9055	59.1011				9.53	9.46	8.9	8.9	9.22	8.71	8.71	8.93	9.67	9.67	9.49				11.2773	11.1976	10.4607	10.4607	10.9373	10.0514	10.0514	10.4926	11.4327	11.4327	11.2616				11.2773	10.9373	11.4327		11.2773	10.409	11.3757
GP119	36.3971	36.2454	17.0213	17.0213	22.3819	29.1925	29.1925	38.2609	33.2649	33.2649	33.2584	14.7929	13.1429	12.0553	8.23	8.05	7.58	7.58	7.74	7.87	7.87	8.35	8.11	8.11	8.28	6.55	6.73	7.35	9.79107	9.60925	8.81099	8.81099	9.0899	9.33527	9.33527	9.93275	9.63199	9.63199	9.8019	7.72005	7.84869	8.43118	9.79107	9.93275	9.8019	8.43118	9.79107	9.2192	9.19648
GP132	46.1397	65.9851							36.345	36.345					5.49	5.13							5.64	5.64					7.15407	6.94945							7.20044	7.20044					7.15407		7.20044		7.15407		7.20044
GP174	20.0368	17.658												27.668	7.96	7.62												7.25	9.26183	8.86694												8.69198	9.26183			8.69198	9.26183
GP183			34.4294	34.4294	20.7392	34.1615	34.1615	19.7101					16.381				8.44	8.44	8.83	8.46	8.46	8.13					8				9.97693	9.97693	10.1468	9.99354	9.99354	9.42469					9.21434			10.1468		9.21434		9.91874
GPR17			60.3482	60.3482	42.9158	76.8116	76.8116	50.7246	63.8604	63.8604	46.5169		71.8095	59.8814			7.31	7.31	7.4	6.42	6.42	5.45	7.09	7.09	6.12		5.62	5.39			9.09066	9.09066	9.03262	8.30543	8.30543	7.15522	8.89523	8.89523	7.78761		7.47618	7.16729		9.09066	8.89523	7.47618		8.49667	8.52602
GPR34			29.9807	29.9807	33.8809	40.1656	40.1656										6.77	6.77	6.25	6.41	6.41										8.24684	8.24684	7.77995	8.01385	8.01385									8.24684				8.06027
GPR35			46.6151	46.6151	35.5236	47.8261	47.8261	37.6812					29.9048	21.9368			5.45	5.45	5.65	5.68	5.68	5.1					5.74	5.68			7.11853	7.11853	7.20052	7.35966	7.35966	6.67612					7.21574	7.02117		7.35966		7.21574		7.13884
GPR55														69.9605														6.77														8.61485				8.61485
GPR84			48.7427	48.7427	69.1992	55.6936	55.6936	50.7246									3.55	3.55	3.94	3.73	3.73	3.37									5.23791	5.23791	5.7801	5.47581	5.47581	5.07522								5.7801				5.38046
GRPR	77.9412	77.5093	68.6654	68.6654	77.2074	75.7764	75.7764	74.4928	78.4394	78.4394	81.3483	40.0394	81.9048	83.2016	9.73	9.66	9.66	9.66	9.82	9.58	9.58	9.79	10.36	10.36	10.19	9.07	9.96	10.12	11.6218	11.5494	11.4967	11.4967	11.7077	11.4595	11.4595	11.6621	12.2545	12.2545	12.1003	10.6725	11.8733	12.0401	11.6218	11.7077	12.2545	12.0401	11.6218	11.5471	11.8205
HRH1	65.2574	67.4721	41.5861	41.5861	29.1581	64.1822	64.1822	70.7246	29.1581	29.1581	19.3258	72.1893	57.3333	37.9447	7.27	7.28	8.03	8.03	8.02	7.32	7.32	7.57	8.03	8.03	7.98	7.24	6.48	5.99	9.08463	9.10912	9.64895	9.64895	9.48476	9.12741	9.12741	9.41957	9.49476	9.49476	9.26614	9.09847	8.23841	7.56915	9.08463	9.64895	9.49476	8.23841	9.08463	9.40951	9.33853
HRH2	47.2426	40.1487			32.0329	33.9545	33.9545	31.5942							6.04	5.96			5.65	5.67	5.67	5.56							7.71433	7.56367			7.1556	7.2009	7.2009	7.05961							7.71433	7.2009			7.71433	7.15425
HRH3			78.53	78.53	75.3593	59.8344	59.8344	21.7391			30.3371		12.9524				6.88	6.88	6.76	6.33	6.33	6.17			6.12		5.75				8.77504	8.77504	8.63714	8.10695	8.10695	7.50724			7.60197		6.86235			8.77504	7.60197	6.86235		8.31806	7.60197
HRH4			40.8124	40.8124	33.0595	15.735	15.735					15.5819					7.44	7.44	7.41	6.71	6.71					6.9					9.05079	9.05079	8.9293	7.90687	7.90687					8.09262				9.05079	8.09262			8.56892	8.09262
KISSR	71.5074	68.4015	69.2456	69.2456	69.1992	66.6667	66.6667	56.8116	64.271	64.271	69.2135	47.5345	67.2381	59.2885	7.61	7.55	7.88	7.88	8.33	7.44	7.44	7.15	9.39	9.39	9.31	6.82	7.46	7.15	9.46435	9.38507	9.72039	9.72039	10.1701	9.26391	9.26391	8.90444	11.198	11.198	11.1502	8.49701	9.28762	8.92297	9.46435	10.1701	11.198	9.28762	9.46435	9.50719	10.5108
LPAR1			40.2321	40.2321	24.23	15.1139	15.1139		48.2546	48.2546	40.4494	42.0118	47.619	23.5178			7.89	7.89	8.2	8.06	8.06		7.66	7.66	8.11	8.05	7.71	8.26			9.49457	9.49457	9.58435	9.23938	9.23938		9.34354	9.34354	9.71691	9.67337	9.38778	9.6314		9.58435	9.71691	9.6314		9.41045	9.51934
LPAR2	51.4706	47.5836	15.4739	15.4739	9.85626	12.2153	12.2153		28.1314	28.1314	15.9551	25.641	23.0476	16.6008	7.69	7.66	8.33	8.33	8.55	8.49	8.49		8.43	8.43	8.32	8.37	8.5	8.44	9.40156	9.33746	9.5196	9.5196	9.54371	9.5769	9.5769		9.87919	9.87919	9.5229	9.77894	9.86263	9.66013	9.40156	9.5769	9.87919	9.86263	9.40156	9.54734	9.76505
LPAR3	74.8162	62.0818	60.9284	60.9284	51.1294	55.9006	55.9006	54.2029	48.0493	48.0493	43.3708	61.9329	48.381	57.5099	5.81	6.03	6.72	6.72	6.99	6.94	6.94	7.19	6.63	6.63	6.81	6.38	6.32	6.54	7.684	7.82296	8.50482	8.50482	8.69867	8.68742	8.68742	8.92402	8.31169	8.31169	8.4472	8.17192	8.00467	8.29974	7.684	8.92402	8.4472	8.29974	7.684	8.66786	8.31062
LPAR4	26.1029	25.4647	23.9845	23.9845	19.3018	31.0559	31.0559	46.3768	36.961	36.961	31.6854	34.3195		23.913	7.31	7.25	7.16	7.16	7.19	7.12	7.12	6.93	6.53	6.53	6.85	6.82		7.21	8.72669	8.65594	8.53993	8.53993	8.4756	8.61214	8.61214	8.5963	8.09774	8.09774	8.35086	8.35554		8.58863	8.72669	8.61214	8.35554	8.58863	8.72669	8.56268	8.22547
LPAR5			46.4217	46.4217	25.6674	57.764	57.764	71.8841									6.67	6.67	6.86	6.66	6.66	6.61									8.33672	8.33672	8.26938	8.42166	8.42166	8.46663								8.46663				8.37546
LPAR6	44.1176	45.9108	69.4391	69.4391	65.2977	73.0849	73.0849	81.1594	48.2546	48.2546	63.1461	49.3097	57.3333	44.2688	5.86	5.51	6.54	6.54	6.79	6.65	6.65	6.28	5.9	5.9	6.25	5.87	6.94	7.07	7.50461	7.17191	8.3816	8.3816	8.6049	8.51383	8.51383	8.18934	7.58354	7.58354	8.05035	7.56293	8.69841	8.7161	7.50461	8.6049	8.05035	8.7161	7.50461	8.43085	7.69509
LT4R1	13.0515	13.197	42.5532	42.5532	55.6468	18.6335	18.6335	17.3913	14.3737	14.3737	45.3933	11.2426	15.2381	11.6601	8.55	8.47	8.67	8.67	9.01	8.58	8.58	8.45	8.45	8.45	8.41	8.48	8.59	8.57	9.66566	9.59048	10.2989	10.2989	10.7554	9.8503	9.8503	9.69033	9.60757	9.60757	10.067	9.53087	9.77293	9.6367	9.66566	10.7554	10.067	9.77293	9.66566	10.124	9.70325
LT4R2			36.3636	36.3636	58.1109	42.236	42.236		9.65092	9.65092	25.3933		14.8571				7.44	7.44	7.75	4.95	4.95		6.98	6.98	6.2		6.69				9.00067	9.00067	9.51426	6.57568	6.57568		7.96457	7.96457	7.60472		7.86194			9.51426	7.96457	7.86194		8.13339	7.84462
MC3R	6.61765				11.0883			16.8116			20.6742				8.29				8.8			8.89			8.86				9.1107				9.84486			10.1156			10.1754				9.1107	10.1156	10.1754		9.1107	9.98024	10.1754
MC4R	33.8235	32.8996	22.4371	22.4371	34.4969	20.0828	20.0828	39.1304	26.2834	26.2834	41.573				7.17	7.46	7.22	7.22	7.44	6.59	6.59	7.49	7.58	7.58	7.72				8.69922	8.97719	8.57097	8.57097	8.97778	7.89282	7.89282	9.08251	8.99968	8.99968	9.33881				8.69922	9.08251	9.33881		8.69922	8.49798	9.11272
MC5R		12.2677	43.5203	43.5203	36.345	37.2671	37.2671	53.3333	45.1745	45.1745	48.5393	24.4576				5.98	5.55	5.55	5.93	5.11	5.11	5.7	5.72	5.72	6.34	5.47				7.06876	7.18869	7.18869	7.49044	6.68133	6.68133	7.427	7.37489	7.37489	8.02609	6.85841				7.49044	8.02609			7.10958	7.40857
MCHR1	83.2721	82.1561	87.0406	87.0406	100	88.1988	88.1988	53.6232	100	100	67.6404	25.4438	57.7143	63.4387	7.68	7.7	8.14	8.14	8.6	7.85	7.85	7.13	8.51	8.51	7.27	6.57	7.26	7.39	9.6005	9.61464	10.0797	10.0797	10.6	9.79546	9.79546	8.85935	10.51	10.51	9.10021	7.97558	9.02128	9.19235	9.6005	10.6	10.51	9.19235	9.6005	9.86829	9.52395
MCHR2	75.1838	73.2342	76.5957	76.5957	84.8049	61.6977	61.6977	59.4203	73.922	73.922	66.9663	73.57	72.1905	67.9842	7.95	8	8.13	8.13	8.67	7.52	7.52	7.61	8.83	8.83	8.17	7.95	7.9	7.78	9.82612	9.86471	10.0142	10.0142	10.5984	9.31027	9.31027	9.38393	10.6988	10.6988	9.99586	9.8167	9.75848	9.61241	9.82612	10.5984	10.6988	9.75848	9.82612	9.77188	10.3025
MRGX1	52.0221	56.3197	27.2727	27.2727	20.3285	39.3375	39.3375	44.9275	34.2916	34.2916	28.0899	66.2722	42.6667	58.8933	6.97	6.95	6.83	6.83	7.07	6.99	6.99	6.91	7.08	7.08	6.92	6.71	7.03	6.78	8.68619	8.70066	8.26573	8.26573	8.37811	8.58481	8.58481	8.56251	8.61519	8.61519	8.36855	8.53133	8.66009	8.55007	8.68619	8.58481	8.61519	8.66009	8.68619	8.44028	8.53256
MRGX2	53.8603	52.4164	42.1663	42.1663	40.0411	56.3147	56.3147	48.6957	54.2094	54.2094	45.1685	43.787	45.9048	33.2016	6.95	6.98	7.31	7.31	7.3	7.09	7.09	6.96	7.13	7.13	7.28	6.72	6.92	6.78	8.68127	8.69947	8.93497	8.93497	8.90251	8.84062	8.84062	8.64749	8.86407	8.86407	8.93484	8.36135	8.58186	8.30116	8.68127	8.93497	8.93484	8.58186	8.68127	8.8502	8.75608
MSHR											21.7978														8.28														9.61841						9.61841				9.61841
MTLR	61.3971	56.8773	70.9865	70.9865	77.4127	47.619	47.619	57.3913	93.0185	93.0185	90.3371	44.7732	63.4286	48.8142	8.98	8.95	9.31	9.31	9.71	9.09	9.09	9.09	10.03	10.03	9.52	8.68	9.29	9.14	10.7681	10.7049	11.1612	11.1612	11.5988	10.7678	10.7678	10.8488	11.9986	11.9986	11.4759	10.331	11.0923	10.8285	10.7681	11.5988	11.9986	11.0923	10.7681	11.0509	11.451
MTR1A			56.2863	56.2863	55.8522	54.0373	54.0373	56.8116									10.33	10.33	10.48	10.08	10.08	10.58									12.0804	12.0804	12.227	11.8127	11.8127	12.3344								12.3344				12.0579
MTR1B			61.3153	61.3153	55.6468	26.9151	26.9151	52.4638									10.1	10.1	10.16	9.6	9.6	10.06									11.8876	11.8876	11.9054	11.03	11.03	11.7799								11.9054				11.5867
NK1R	85.1103	83.2714	87.234	87.234	88.7064	91.7184	91.7184	97.3913	81.9302	81.9302	91.236	81.0651	90.0952	89.5257	9.32	9.3	9.52	9.52	9.41	9.23	9.23	9.27	9.89	9.89	9.94	8.83	9.25	9.58	11.25	11.2205	11.4607	11.4607	11.358	11.1925	11.1925	11.2585	11.8034	11.8034	11.9002	10.7388	11.2047	11.5319	11.25	11.4607	11.9002	11.5319	11.25	11.3205	11.5615
NK2R	51.2868	48.3271	64.6035	64.6035	54.8255	55.6936	55.6936	57.971	66.3244	66.3244	68.9888	45.7594	58.2857	51.1858	8.64	8.69	9.37	9.37	9.54	8.84	8.84	8.94	10	10	10.01	8.58	8.9	8.86	10.35	10.3742	11.1803	11.1803	11.279	10.5858	10.5858	10.7032	11.8217	11.8217	11.8488	10.2405	10.6656	10.5691	10.35	11.279	11.8488	10.6656	10.35	10.9191	11.4332
NK3R	69.8529	64.684	69.8259	69.8259	68.3778	50.9317	50.9317	49.2754	73.306	73.306	80.2247	45.1677	59.0476	72.332	7.94	7.88	8.08	8.08	8.02	7.51	7.51	7.69	8.6	8.6	8.63	7.53	7.84	8.12	9.78418	9.6908	9.92402	9.92402	9.85492	9.21699	9.21699	9.38263	10.4651	10.4651	10.5343	9.18483	9.6112	9.97933	9.78418	9.92402	10.5343	9.97933	9.78418	9.58659	10.1624
NMBR	63.0515	63.197	67.5048	67.5048	71.8686	60.6625	60.6625	64.6377	78.6448	78.6448	73.4831	18.9349	58.6667	65.8103	9.96	10.03	10.17	10.17	10.43	10.08	10.08	10.4	10.84	10.84	10.72	8.85	10.04	10.47	11.7597	11.8307	11.9993	11.9993	12.2865	11.8629	11.8629	12.2105	12.7357	12.7357	12.5862	10.1273	11.8084	12.2883	11.7597	12.2865	12.7357	12.2883	11.7597	12.0369	12.0462
NMUR1	41.9118	46.2825	41.9729	41.9729	59.3429	15.1139	15.1139		77.6181	77.6181	80.8989	13.6095	24.7619	25.4941	7.8	7.83	7.82	7.82	8.1	7.47	7.47		9.04	9.04	8.9	7.33	7.61	7.65	9.42234	9.49542	9.44297	9.44297	9.87337	8.64938	8.64938		10.93	10.93	10.8079	8.46384	9.00378	9.05644	9.42234	9.87337	10.93	9.05644	9.42234	9.21161	10.2829
NMUR2	38.9706	36.6171	72.147	72.147	67.5565	67.7019	67.7019	71.0145	63.655	63.655	65.1685	73.9645	72	47.4308	7.86	7.86	8.91	8.91	9.39	8.41	8.41	8.57	9.37	9.37	9.32	9.08	8.68	7.92	9.45074	9.42368	10.7682	10.7682	11.2197	10.2406	10.2406	10.4213	11.1738	11.1738	11.134	10.949	10.5373	9.59606	9.45074	11.2197	11.1738	10.5373	9.45074	10.6098	11.1077
NPBW1			48.1625	48.1625	48.6653	22.7743	22.7743										6.95	6.95	7.07	6.02	6.02										8.63271	8.63271	8.75722	7.37745	7.37745									8.75722				8.15551
NPFF1			76.7892	76.7892	79.4661	69.7723	69.7723	68.1159									6.8	6.8	7.47	6.64	6.64	6.92									8.6853	8.6853	9.37018	8.48368	8.48368	8.75325								9.37018				8.74357
NPFF2			71.5667	71.5667	71.2526	65.8385	65.8385	69.2754									7.85	7.85	8.03	7.8	7.8	7.94									9.70471	9.70471	9.8828	9.61848	9.61848	9.78058								9.8828				9.71829
NTR1	22.2426	18.9591	50.0967	50.0967	55.4415	37.2671	37.2671	35.3623	76.7967	76.7967	83.8202	17.1598	35.4286	26.8775	8.14	8.04	9.03	9.03	9.16	8.65	8.65	8.94	9.72	9.72	9.61	7.9	8.65	8.6	9.48719	9.31782	10.7298	10.7298	10.9038	10.2213	10.2213	10.4885	11.6053	11.6053	11.5333	9.13451	10.1994	10.0294	9.48719	10.9038	11.6053	10.1994	9.48719	10.5491	10.9696
OPRD			37.911	37.911	38.809	23.1884	23.1884				37.5281	12.426	17.3333				8.42	8.42	8.8	7.79	7.79				8.38	7.31	7.19				9.99877	9.99877	10.3889	9.15527	9.15527				9.95436	8.40433	8.42888			10.3889	9.95436	8.42888		9.7394	9.17934
OPRK			73.6944	73.6944	74.7433	47.412	47.412	60			32.1348		12.5714				7.84	7.84	8.14	7.52	7.52	7.68			7.27		7.21				9.70743	9.70743	10.0136	9.19589	9.19589	9.45815			8.77698		8.30938			10.0136	8.77698	8.30938		9.54639	8.77698
OPRM			51.8375	51.8375	52.5667	32.0911	32.0911	34.4928									7.22	7.22	7.45	6.77	6.77	7.04									8.93464	8.93464	9.17071	8.27638	8.27638	8.57773								9.17071				8.69508
OPRX			94.971	94.971	94.2505	92.9607	92.9607	98.2609	33.0595	33.0595	86.0674	33.5306	60	34.9802			9	9	9.59	8.74	8.74	9.09	7.66	7.66	8.94	7.43	7.87	7.71			10.9776	10.9776	11.5643	10.7083	10.7083	11.0824	9.1793	9.1793	10.8748	8.95544	9.64815	9.25382		11.5643	10.8748	9.64815		11.0031	9.54722
OX1R	78.6765	76.0223	67.118	67.118	38.193	81.1594	81.1594	63.7681	72.4846	72.4846	70.5618	38.2643	64.9524	64.8221	8.16	8.2	9.32	9.32	9.52	8.69	8.69	9.38	9.33	9.33	9.62	9.76	9.53	9.44	10.0558	10.0809	11.1468	11.1468	11.102	10.5993	10.5993	11.1846	11.1902	11.1902	11.4686	11.3428	11.3426	11.2517	10.0558	11.1846	11.4686	11.3426	10.0558	10.9632	11.298
OX2R	55.5147	50.9294	70.4062	70.4062	72.8953	63.5611	63.5611	60.2899	86.8583	86.8583	88.764	51.6765	59.8095	79.6443	7.11	7.18	7.53	7.53	7.82	7.4	7.4	7.79	8.22	8.22	8.25	7.06	7.23	7.76	8.85441	8.88697	9.37761	9.37761	9.6827	9.20319	9.20319	9.57024	10.1588	10.1588	10.1982	8.77329	9.00677	9.66115	8.85441	9.6827	10.1982	9.66115	8.85441	9.40242	9.82229
OXGR1	31.25	30.2974	39.6518	39.6518	23.8193	44.5135	44.5135	31.3043	15.1951	15.1951					4.14	3.99	4.21	4.21	4.57	4.14	4.14	4.47	5.11	5.11					5.63485	5.47141	5.80826	5.80826	5.94693	5.78849	5.78849	5.9656	6.2917	6.2917					5.63485	5.9656	6.2917		5.63485	5.85101	6.2917
OXYR	40.625	37.3606	35.9768	35.9768					56.6735	56.6735	34.6067				8.02	8.01	7.65	7.65					8.57	8.57	7.95				9.62879	9.58241	9.20602	9.20602					10.3234	10.3234	9.48916				9.62879	9.20602	10.3234		9.62879	9.20602	10.0453
P2RY1												33.925														6.68														8.21052					8.21052				8.21052
P2RY2
P2RY4	9.74265	15.7993	19.5358	19.5358		18.4265	18.4265	23.4783				16.568	8.7619	21.7391	6.58	6	7.65	7.65		7.58	7.58	7.04				6.82	6.31	7.15	7.56868	7.19864	8.94083	8.94083		8.84544	8.84544	8.41067				8.03927	7.2526	8.48724	7.56868	8.94083	8.03927	8.48724	7.56868	8.79664	8.03927
P2RY6
P2Y10			18.5687	18.5687	26.078	26.7081	26.7081	49.8551			21.1236		25.9048	23.913			7.38	7.38	7.42	7.02	7.02	7.05			7.42		7.46	7.77			8.64878	8.64878	8.83627	8.44664	8.44664	8.74771			8.74477		8.87338	9.14863		8.83627	8.74477	9.14863		8.62914	8.74477
P2Y11		21.3755	31.7215	31.7215	29.9795	62.5259	62.5259	64.3478	22.7926	22.7926	19.1011	72.9783	34.8571	24.3083		6.71	6.78	6.78	6.9	6.35	6.35	6.14	6.88	6.88	6.8	5.65	6.68	6.91		8.03992	8.28135	8.28135	8.37682	8.14606	8.14606	7.94853	8.23779	8.23779	8.08106	7.51319	8.22229	8.29575		8.37682	8.23779	8.29575		8.1967	8.01746
P2Y12						42.029	42.029	53.3333	27.9261	27.9261	46.9663		55.0476	48.2213						6.75	6.75	6.14	5.58	5.58	5.74		5.6	5.53						8.37355	8.37355	7.867	7.02601	7.02601	7.41179		7.34074	7.21324		8.37355	7.41179	7.34074		8.2047	7.1546
P2Y13			18.5687	18.5687	11.9097	18.2195	18.2195		35.729	35.729	41.3483	7.88955		12.4506			5.52	5.52	5.62	6.04	6.04		6.49	6.49	6.51	6.46		6.26			6.78878	6.78878	6.6959	7.30054	7.30054		8.04302	8.04302	8.12646	7.35705		7.35519		7.30054	8.12646	7.35519		6.97491	7.89239
P2Y14								13.3333	8.21355	8.21355	17.0787											6.91	5.28	5.28	6.02											8.03494	6.19453	6.19453	7.25245					8.03494	7.25245			8.03494	6.54717
PACR	87.3162	85.5019	66.1509	66.1509	74.1273	74.3271	74.3271	75.6522	89.9384	89.9384	94.6067			50.9881	8.38	8.37	7.14	7.14	7.15	7.11	7.11	6.99	8.46	8.46	7.94			6.85	10.3211	10.302	8.96054	8.96054	9.01998	8.98115	8.98115	8.86882	10.4139	10.4139	9.91592			8.55747	10.3211	9.01998	10.4139	8.55747	10.3211	8.96203	10.2479
PAR1			50.2901	50.2901	40.8624	65.4244	65.4244	56.5217	54.8255	54.8255	58.8764	59.7633	48.7619	58.6957			7.85	7.85	7.89	7.43	7.43	7.32	7.65	7.65	7.39	7.79	7.85	7.59			9.55148	9.55148	9.50132	9.24574	9.24574	9.07222	9.38898	9.38898	9.15994	9.56643	9.53808	9.35861		9.55148	9.56643	9.53808		9.36133	9.37609
PAR2	41.3603	40.1487	58.9942	58.9942	58.9322	71.2215	71.2215	62.8986	53.7988	53.7988	63.8202	68.4418	60.381	64.4269	5.57	5.5	6.48	6.48	6.46	6.1	6.1	6.13	6.37	6.37	6.28	6.16	6.41	6.28	7.18658	7.10367	8.25081	8.25081	8.23035	7.95261	7.95261	7.92864	8.10077	8.10077	8.08496	7.99532	8.1909	8.08907	7.18658	8.25081	8.10077	8.1909	7.18658	8.09431	8.07046
PAR3	65.9926	67.2862	76.7892	76.7892	69.4045	65.8385	65.8385	62.6087	55.8522	55.8522	62.0225	72.3866	70.8571	67.7866	8.37	8.16	8.38	8.38	8.8	8.24	8.24	7.94	7.77	7.77	8.35	8.69	8.9	8.32	10.1895	9.98793	10.2653	10.2653	10.6414	10.0585	10.0585	9.73663	9.51704	9.51704	10.1425	10.5497	10.7504	10.1511	10.1895	10.6414	10.5497	10.7504	10.1895	10.1709	9.93157
PAR4	69.4853	67.2862	66.7311	66.7311	36.5503	68.9441	68.9441	79.4203	44.5585	44.5585	35.5056	100	64.7619	50.5929	7.31	7.3	7.88	7.88	8.26	7.55	7.55	7.1	8.06	8.06	7.97	6.68	7.81	8.09	9.15189	9.12793	9.70433	9.70433	9.82289	9.3885	9.3885	8.99993	9.70893	9.70893	9.5203	8.68	9.62132	9.79409	9.15189	9.82289	9.70893	9.79409	9.15189	9.50141	9.40454
PD2R	70.2206	70.2602							53.1828	53.1828	45.618		6.47619	37.1542	7.8	7.65							6.65	6.65	6.03		6.17	5.54	9.64646	9.49671							8.37577	8.37577	7.68914		6.98132	7.11001	9.64646		8.37577	7.11001	9.64646		8.14689
PE2R1	63.9706	62.6394	46.8085	46.8085	24.6407	23.8095	23.8095		80.0821	80.0821	75.5056	20.1183	69.1429	54.1502	8.42	8.32	8.04	8.04	7.8	7.78	7.78		8.93	8.93	8.59	7.83	8.41	8.04	10.226	10.1168	9.71032	9.71032	9.19165	9.15675	9.15675		10.8335	10.8335	10.468	9.13359	10.2497	9.7736	10.226	9.71032	10.8335	10.2497	10.226	9.38516	10.3172
PE2R2	77.0221	67.658													7.91	7.44													9.79662	9.27032													9.79662				9.79662
PE2R3	68.5662	62.0818	87.234	87.234	84.5996	87.1636	87.1636	89.5652	49.692	49.692	75.7303	33.7278	81.5238	83.3992	8.33	8.25	9.57	9.57	9.34	9.52	9.52	9.37	8.1	8.1	8.83	7.97	10.09	8.87	10.1661	10.043	11.5107	11.5107	11.2674	11.4603	11.4603	11.3221	9.79629	9.79629	10.7093	9.49799	12.0013	10.7912	10.1661	11.5107	10.7093	12.0013	10.1661	11.4219	9.94996
PE2R4	56.9853	54.461	56.4797	56.4797											9.18	9.1	8.89	8.89											10.9358	10.8361	10.6419	10.6419											10.9358	10.6419			10.9358	10.6419
PF2R	56.9853	57.4349	22.824	22.824	30.1848	19.0476	19.0476	24.9275	61.807	61.807	57.9775	35.3057	28.7619	44.8617	9.04	8.92	7.59	7.59	7.95	7.59	7.59	7.34	9.09	9.09	8.84	7.86	7.71	8.23	10.7958	10.6792	8.94839	8.94839	9.42979	8.86984	8.86984	8.73668	10.881	10.881	10.6033	9.40785	9.16882	9.88188	10.7958	9.42979	10.881	9.88188	10.7958	8.96716	10.4433
PI2R	81.8015	82.8996							74.9487	74.9487			16.5714		9.21	8.96							8.46	8.46			7.73		11.1228	10.8786							10.3348	10.3348			8.94936		11.1228		10.3348	8.94936	11.1228		10.3348
PRLHR			33.8491	33.8491	51.3347	36.2319	36.2319		67.9671	67.9671	70.7865			30.4348			7.75	7.75	7.98	7.86	7.86		8.29	8.29	8.23			7.79			9.27955	9.27955	9.69041	9.41909	9.41909		10.1223	10.1223	10.08			9.27337		9.69041	10.1223	9.27337		9.41754	10.1082
PTAFR	40.8088	44.2379				27.1222	27.1222	32.4638				26.0355		58.1028	9.29	9.24				9.58	9.58	9.55				9.53		9.02	10.9008	10.8858				11.0133	11.0133	11.0614				10.9456		10.7842	10.9008	11.0614	10.9456	10.7842	10.9008	11.0293	10.9456
PTH1R	63.0515	60.5948							30.1848	30.1848	25.3933				8.43	8.25							7.9	7.9	7.92				10.2297	10.0324							9.37979	9.37979	9.32472				10.2297		9.37979		10.2297		9.36143
PTH2R	50.5515	41.2639	15.2805	15.2805		15.1139	15.1139	24.058	37.7823	37.7823	35.9551	10.4536		15.2174	8.81	8.75	8.45	8.45		8.54	8.54	8.73	8.81	8.81	8.79	9.13		8.39	10.5137	10.3656	9.63414	9.63414		9.71938	9.71938	10.1113	10.3873	10.3873	10.3458	10.1493		9.57234	10.5137	10.1113	10.3873	9.57234	10.5137	9.76366	10.3174
S1PR1			49.9033	49.9033	35.729	45.1346	45.1346	48.6957					40.1905	48.419			7.1	7.1	7.75	6.76	6.76	7.28					6.5	6.01			8.79813	8.79813	9.30302	8.41451	8.41451	8.96749					8.10412	7.69502		9.30302		8.10412		8.78263
S1PR2	28.3088	26.9517	51.0638	51.0638	41.8891	53.6232	53.6232	39.7101	53.1828	53.1828	54.1573	51.8738	43.4286		6.95	6.86	7.91	7.91	8.48	8.14	8.14	8.69	7.75	7.75	8.18	7.46	8.62		8.40192	8.29059	9.61811	9.61811	10.1021	9.86935	9.86935	10.2889	9.47577	9.47577	9.91366	9.17495	10.2578		8.40192	10.2889	9.91366	10.2578	8.40192	9.89432	9.51004
S1PR3	64.1544	63.7546	43.7137	43.7137	28.1314	32.7122	32.7122	26.9565	50.924	50.924	67.191	55.8185	27.4286	28.0632	6.59	6.56	7.64	7.64	7.97	7.86	7.86	7.89	7.36	7.36	7.36	7.56	7.93	7.76	8.39723	8.36451	9.28062	9.28062	9.41919	9.37471	9.37471	9.32066	9.06692	9.06692	9.18731	9.30678	9.3682	9.20814	8.39723	9.41919	9.30678	9.3682	8.39723	9.34175	9.15698
S1PR5			22.4371	22.4371	40.2464									30.0395			6.7	6.7	6.88									5.55			8.05097	8.05097	8.48473									7.02769		8.48473		7.02769		8.19555
SSR1			66.7311	66.7311	55.2361	53.2091	53.2091	36.2319			34.8315	27.8107	64.5714	19.5652			9.08	9.08	9.5	8.44	8.44	8.04			8.27	8.07	8.65	7.74			10.9043	10.9043	11.2422	10.166	10.166	9.59909			9.81197	9.51421	10.46	9.03148		11.2422	9.81197	10.46		10.497	9.66309
SSR2			55.5126	55.5126	73.5113	39.9586	39.9586	29.2754			51.236	18.7377					8.59	8.59	9.24	8.42	8.42	8.28			8.65	8.02					10.3344	10.3344	11.1064	10.0216	10.0216	9.7465			10.3596	9.29272				11.1064	10.3596			10.2608	9.82615
SSR3			64.4101	64.4101	70.8419	37.2671	37.2671	35.6522			33.9326	17.7515	13.7143				8.36	8.36	8.57	7.64	7.64	7.37			7.57	7.01	7.32				10.169	10.169	10.4203	9.21133	9.21133	8.92209			9.10062	8.25923	8.45717			10.4203	9.10062	8.45717		9.68382	8.67993
SSR4			68.6654	68.6654	67.3511	39.3375	39.3375	27.2464			26.5169	17.5542	55.2381				8.98	8.98	9.49	8.47	8.47	8.27			8.54	8.43	8.65				10.8167	10.8167	11.3183	10.0648	10.0648	9.70531			9.96352	9.67438	10.3922			11.3183	9.96352	10.3922		10.4645	9.81895
SSR5	32.5368	25.0929	91.6828	91.6828	80.0821	90.2692	90.2692	91.3043	75.3593	75.3593	80	85.9961	88.1905	65.6126	7.17	7.12	9.45	9.45	10	9.18	9.18	9.07	7.7	7.7	8.83	8.05	8.22	7.38	8.68237	8.51955	11.4123	11.4123	11.9035	11.1355	11.1355	11.0305	9.57714	9.57714	10.7331	9.98448	10.1654	9.19699	8.68237	11.9035	10.7331	10.1654	8.68237	11.3383	9.96796
TA2R	88.4191	87.9182	93.8104	93.8104	76.5914	50.3106	50.3106	33.3333	89.3224	89.3224	94.6067	32.5444	89.7143	100	8	7.84	8.16	8.16	7.48	7.11	7.11	6.96	9.13	9.13	9.08	6.85	8.01	8.63	9.94655	9.78408	10.1323	10.1323	9.36418	8.81166	8.81166	8.48288	11.081	11.081	11.0559	8.36248	9.96286	10.63	9.94655	10.1323	11.081	10.63	9.94655	9.28915	10.3951
TRFR	78.8603	70.632	66.5377	66.5377	77.4127	65.4244	65.4244	53.3333	95.2772	95.2772	94.1573	52.4655	48	55.1383	8.36	8.36	8.46	8.46	8.88	7.95	7.95	7.51	9.91	9.91	10.13	7.78	7.38	7.73	10.2569	10.209	10.2831	10.2831	10.7688	9.76574	9.76574	9.237	11.889	11.889	12.1039	9.49987	9.06124	9.47145	10.2569	10.7688	12.1039	9.47145	10.2569	10.0172	11.3454
UR2R	54.4118	56.8773	33.2689	33.2689	21.9713	29.1925	29.1925	54.2029	22.7926	22.7926	33.2584	40.4339	60	33.3992	9.66	9.61	10.25	10.25	10.21	10.07	10.07	10.04	10.13	10.13	10.05	9.29	9.68	9.24	11.3957	11.3649	11.772	11.772	11.5519	11.5353	11.5353	11.774	11.4878	11.4878	11.5719	10.8967	11.4582	10.7637	11.3957	11.774	11.5719	11.4582	11.3957	11.6567	11.3611
V1AR	74.0809	70.8178	56.6731	56.6731	59.1376	19.0476	19.0476	35.942	70.2259	70.2259	63.1461	14.9901	21.7143		9.94	9.88	9.3	9.3	9.25	8.68	8.68	8.64	10.59	10.59	9.42	8.51	8.51		11.8097	11.7301	11.0534	11.0534	11.0219	9.95984	9.95984	10.1956	12.4365	12.4365	11.2203	9.68581	9.84675		11.8097	11.0534	12.4365	9.84675	11.8097	10.5407	11.4448
V1BR	82.9044	81.0409	65.5706	65.5706	69.1992	30.8489	30.8489	46.087	84.3943	84.3943	54.1573		13.9048		9.52	9.46	9.03	9.03	9.12	8.84	8.84	8.78	9.88	9.88	8.98		8.79		11.4386	11.3687	10.8467	10.8467	10.9601	10.3292	10.3292	10.4436	11.8063	11.8063	10.7137		9.93316		11.4386	10.9601	11.8063	9.93316	11.4386	10.6259	11.4421
V2R	91.1765	89.4052							52.1561	52.1561					11.03	10.97							9.09	9.09					12.9899	12.9214							10.8073	10.8073					12.9899		10.8073		12.9899		10.8073
	Emax min-max normalized														pEC50														Log(Emax/EC50)														FAM-Log(Emax/EC50)				FAM-Log(Emax/EC50)
[truncated: 23 more columns]

## Sheet: GtP
UniProt	Uniprot	IUPHAR Name	IUPHAR TargetID	Gene	GeneAlt	Class	Ligandtype	Family	Primary Transducer	Secondary Transducer	PrimaryEffectors	SecondaryEffectors	primary_PMID	secondary_PMID	num prim pmids	Gs	Gi/o	Gq/11	G12/13	Gs_0-2	Gi/o_0-2	Gq/11_0-2	G12/13_0-2	Gs_0-1	Gi/o_0-1	Gq/11_0-1	G12/13_0-1	Non- coupling	254
C3AR	Q16581	C3a	31	C3AR1	AZ3B;C3R1;HNFAG09	A (Rhodopsin)	Peptide receptors	Complement peptide receptors	G protein (identity unknown)		Other - See Comments		21799898|21589858		02:00:00					0	0	0	0	-	-	-	-		0
C5AR2	Q9P296	C5a2	33	C5AR2	C5L2;GPR77	A (Rhodopsin)	Peptide receptors	Complement peptide receptors			Other - See Comments									0	0	0	0	-	-	-	-		0
NPY6R	Q99463	Y6	683	NPY6R	NPY1RL;Y2B	A (Rhodopsin)	Peptide receptors	Neuropeptide Y receptors												0	0	0	0	-	-	-	-		0
PRLHR	P49683	PrRP	337	PRLHR	GPR10;GR3	A (Rhodopsin)	Peptide receptors	Prolactin-releasing peptide receptors												0	0	0	0	-	-	-	-		0
PAR1	P25116	PAR1	374	F2R	CF2R;PAR1;TR	A (Rhodopsin)	Peptide receptors	Proteinase-activated receptors												0	0	0	0	-	-	-	-		0
PAR2	P55085	PAR2	348	F2RL1	GPR11;PAR2	A (Rhodopsin)	Peptide receptors	Proteinase-activated receptors												0	0	0	0	-	-	-	-		0
PAR3	O00254	PAR3	349	F2RL2	PAR3	A (Rhodopsin)	Peptide receptors	Proteinase-activated receptors												0	0	0	0	-	-	-	-		0
PAR4	Q96RI0	PAR4	350	F2RL3	PAR4	A (Rhodopsin)	Peptide receptors	Proteinase-activated receptors												0	0	0	0	-	-	-	-		0
ACKR1	Q16570	ACKR1	316	ACKR1	DARC;FY;GPD	A (Rhodopsin)	Protein receptors	Chemokine receptors												0	0	0	0	-	-	-	-		0
ACKR2	O00590	ACKR2	314	ACKR2	CCBP2;CCR10;CMKBR9;D6	A (Rhodopsin)	Protein receptors	Chemokine receptors												0	0	0	0	-	-	-	-		0
ACKR3	P25106	ACKR3	80	ACKR3	CMKOR1;CXCR7;GPR159;RDC1	A (Rhodopsin)	Protein receptors	Chemokine receptors												0	0	0	0	-	-	-	-		0
ACKR4	Q9NPB9	ACKR4	315	ACKR4	CCBP2;CCR11;CCRL1;VSHK1	A (Rhodopsin)	Protein receptors	Chemokine receptors												0	0	0	0	-	-	-	-		0
CCRL2	O00421	CCRL2	78	CCRL2	CCR11;CCR6;CKRX;CRAM;HCR	A (Rhodopsin)	Protein receptors	Chemokine receptors												0	0	0	0	-	-	-	-		0
GPR42	O15529	GPR42	228	GPR42	GPR42P	A (Rhodopsin)	Lipid receptors	Free fatty acid receptors												0	0	0	0	-	-	-	-		0
P2Y12	Q9H244	P2Y12	328	P2RY12	HORK3	A (Rhodopsin)	Nucleotide receptors	P2Y receptors			Adenylate cyclase inhibition	Adenylate cyclase inhibition, Other - See Comments	14573771		01:00:00					0	0	0	0	-	-	-	-		0
OPSD	P08100	Rhodopsin	2963	RHO	OPN2	A (Rhodopsin)	Sensory receptors	Opsins												0	0	0	0	-	-	-	-		0
OPN3	Q9H1Y3	OPN3	160	OPN3	ECPN	A (Rhodopsin)	Sensory receptors	Opsins												0	0	0	0	-	-	-	-		0
OPSB	P03999	OPN1SW	2960	OPN1SW	BCP	A (Rhodopsin)	Sensory receptors	Opsins												0	0	0	0	-	-	-	-		0
OPSG	P04001	OPN1MW	2962	OPN1MW	GCP	A (Rhodopsin)	Sensory receptors	Opsins												0	0	0	0	-	-	-	-		0
OPSR	P04000	OPN1LW	2961	OPN1LW	RCP	A (Rhodopsin)	Sensory receptors	Opsins												0	0	0	0	-	-	-	-		0
GPR1	P46091	GPR1	82	GPR1		A (Rhodopsin)	Orphan receptors	Class A orphans												0	0	0	0	-	-	-	-		0
GPR15	P49685	GPR15	87	GPR15		A (Rhodopsin)	Orphan receptors	Class A orphans												0	0	0	0	-	-	-	-		0
GPR19	Q15760	GPR19	90	GPR19		A (Rhodopsin)	Orphan receptors	Class A orphans												0	0	0	0	-	-	-	-		0
GPR21	Q99679	GPR21	92	GPR21		A (Rhodopsin)	Orphan receptors	Class A orphans					15090189		01:00:00					0	0	0	0	-	-	-	-		0
GPR25	O00155	GPR25	95	GPR25		A (Rhodopsin)	Orphan receptors	Class A orphans												0	0	0	0	-	-	-	-		0
GPR32	O75388	GPR32	99	GPR32		A (Rhodopsin)	Orphan receptors	Class A orphans												0	0	0	0	-	-	-	-		0
GPR35	Q9HC97	GPR35	102	GPR35		A (Rhodopsin)	Orphan receptors	Class A orphans												0	0	0	0	-	-	-	-		0
GPR45	Q9Y5Y3	GPR45	106	GPR45		A (Rhodopsin)	Orphan receptors	Class A orphans												0	0	0	0	-	-	-	-		0
MTR1L	Q13585	GPR50	107	GPR50		A (Rhodopsin)	Orphan receptors	Class A orphans												0	0	0	0	-	-	-	-		0
GPR52	Q9Y2T5	GPR52	108	GPR52		A (Rhodopsin)	Orphan receptors	Class A orphans												0	0	0	0	-	-	-	-		0
GPR61	Q9BZJ8	GPR61	110	GPR61	BALGR	A (Rhodopsin)	Orphan receptors	Class A orphans					19025769		01:00:00					0	0	0	0	-	-	-	-		0
GPR62	Q9BZJ7	GPR62	111	GPR62		A (Rhodopsin)	Orphan receptors	Class A orphans												0	0	0	0	-	-	-	-		0
GPR63	Q9BZJ6	GPR63	112	GPR63	PSP24B	A (Rhodopsin)	Orphan receptors	Class A orphans												0	0	0	0	-	-	-	-		0
GPR82	Q96P67	GPR82	118	GPR82		A (Rhodopsin)	Orphan receptors	Class A orphans												0	0	0	0	-	-	-	-		0
GPR83	Q9NYM4	GPR83	119	GPR83	GPR72;KIAA1540	A (Rhodopsin)	Orphan receptors	Class A orphans												0	0	0	0	-	-	-	-		0
GPR85	P60893	GPR85	121	GPR85	SREB2	A (Rhodopsin)	Orphan receptors	Class A orphans												0	0	0	0	-	-	-	-		0
GPR87	Q9BY21	GPR87	122	GPR87	GPR95;FKSG78	A (Rhodopsin)	Orphan receptors	Class A orphans												0	0	0	0	-	-	-	-		0
GPR88	Q9GZN0	GPR88	123	GPR88	STRG	A (Rhodopsin)	Orphan receptors	Class A orphans												0	0	0	0	-	-	-	-		0
GP132	Q9UNW8	GPR132	128	GPR132	G2A	A (Rhodopsin)	Orphan receptors	Class A orphans			Other - See Comments		12586833|10951580		02:00:00					0	0	0	0	-	-	-	-		0
GP135	Q8IZ08	GPR135	129	GPR135		A (Rhodopsin)	Orphan receptors	Class A orphans												0	0	0	0	-	-	-	-		0
GP141	Q7Z602	GPR141		GPR141	PGR13	A (Rhodopsin)	Orphan receptors	Class A orphans												0	0	0	0	-	-	-	-		0
GP142	Q7Z601	GPR142	132	GPR142	PGR2	A (Rhodopsin)	Orphan receptors	Class A orphans												0	0	0	0	-	-	-	-		0
GP146	Q96CH1	GPR146	133	GPR146	PGR8	A (Rhodopsin)	Orphan receptors	Class A orphans												0	0	0	0	-	-	-	-		0
GP148	Q8TDV2	GPR148	134	GPR148	BTR;PGR6	A (Rhodopsin)	Orphan receptors	Class A orphans												0	0	0	0	-	-	-	-		0
GP149	Q86SP6	GPR149		GPR149	PGR10	A (Rhodopsin)	Orphan receptors	Class A orphans												0	0	0	0	-	-	-	-		0
GP150	Q8NGU9	GPR150		GPR150		A (Rhodopsin)	Orphan receptors	Class A orphans												0	0	0	0	-	-	-	-		0
GP151	Q8TDV0	GPR151	137	GPR151	PGR7	A (Rhodopsin)	Orphan receptors	Class A orphans												0	0	0	0	-	-	-	-		0
GP152	Q8TDT2	GPR152	138	GPR152	PGR5	A (Rhodopsin)	Orphan receptors	Class A orphans												0	0	0	0	-	-	-	-		0
GP153	Q6NV75	GPR153	139	GPR153	PGR1	A (Rhodopsin)	Orphan receptors	Class A orphans												0	0	0	0	-	-	-	-		0
GP160	Q9UJ42	GPR160	140	GPR160	GPCR150	A (Rhodopsin)	Orphan receptors	Class A orphans												0	0	0	0	-	-	-	-		0
GP161	Q8N6U8	GPR161	141	GPR161		A (Rhodopsin)	Orphan receptors	Class A orphans												0	0	0	0	-	-	-	-		0
GP162	Q16538	GPR162	142	GPR162	GRCA	A (Rhodopsin)	Orphan receptors	Class A orphans												0	0	0	0	-	-	-	-		0
GP171	O14626	GPR171	143	GPR171	H963	A (Rhodopsin)	Orphan receptors	Class A orphans												0	0	0	0	-	-	-	-		0
GP173	Q9NS66	GPR173	144	GPR173	SREB3	A (Rhodopsin)	Orphan receptors	Class A orphans												0	0	0	0	-	-	-	-		0
GP174	Q9BXC1	GPR174	145	GPR174	FKSG79;GPCR17	A (Rhodopsin)	Orphan receptors	Class A orphans												0	0	0	0	-	-	-	-		0
GP176	Q14439	GPR176	637	GPR176		A (Rhodopsin)	Orphan receptors	Class A orphans												0	0	0	0	-	-	-	-		0
GP182	O15218	GPR182	146	GPR182	ADMR	A (Rhodopsin)	Orphan receptors	Class A orphans												0	0	0	0	-	-	-	-		0
LGR4	Q9BXB1	LGR4	147	LGR4	GPR48	A (Rhodopsin)	Orphan receptors	Class A orphans			Adenylate cyclase inhibition		19605502|18424556		02:00:00					0	0	0	0	-	-	-	-		0
LGR5	O75473	LGR5	148	LGR5	GPR49;GPR67	A (Rhodopsin)	Orphan receptors	Class A orphans												0	0	0	0	-	-	-	-		0
TAAR8	Q969N4	TAAR8	172	TAAR8	GPR102;TA5;TAR5;TRAR5	A (Rhodopsin)	Orphan receptors	Class A orphans												0	0	0	0	-	-	-	-		0
LGR6	Q9HBX8	LGR6	149	LGR6	UNQ6427/PRO21331;VTS20631	A (Rhodopsin)	Orphan receptors	Class A orphans												0	0	0	0	-	-	-	-		0
MAS1L	P35410	MAS1L	151	MAS1L	MRG	A (Rhodopsin)	Orphan receptors	Class A orphans												0	0	0	0	-	-	-	-		0
MRGRE	Q86SM8	MRGPRE	153	MRGPRE	GPR167;MRGE	A (Rhodopsin)	Orphan receptors	Class A orphans												0	0	0	0	-	-	-	-		0
MRGRF	Q96AM1	MRGPRF	154	MRGPRF	GPR140;GPR168;MRGF;PSEC0142	A (Rhodopsin)	Orphan receptors	Class A orphans												0	0	0	0	-	-	-	-		0
MRGRG	Q86SM5	MRGPRG	155	MRGPRG	GPR169;MRGG	A (Rhodopsin)	Orphan receptors	Class A orphans												0	0	0	0	-	-	-	-		0
P2RY8	Q86VZ1	P2RY8	164	P2RY8		A (Rhodopsin)	Orphan receptors	Class A orphans												0	0	0	0	-	-	-	-		0
P2Y10	O00398	P2RY10	165	P2RY10		A (Rhodopsin)	Orphan receptors	Class A orphans												0	0	0	0	-	-	-	-		0
TAAR2	Q9P1P5	TAAR2	167	TAAR2	GPR58	A (Rhodopsin)	Orphan receptors	Class A orphans					16878137		01:00:00					0	0	0	0	-	-	-	-		0
TAAR3	Q9P1P4	TAAR3	168	TAAR3P	GPR57;TAAR3	A (Rhodopsin)	Orphan receptors	Class A orphans												0	0	0	0	-	-	-	-		0
TAAR5	O14804	TAAR5	170	TAAR5	PNR	A (Rhodopsin)	Orphan receptors	Class A orphans												0	0	0	0	-	-	-	-		0
TAAR6	Q96RI8	TAAR6	171	TAAR6	TA4;TAR4;TRAR4	A (Rhodopsin)	Orphan receptors	Class A orphans												0	0	0	0	-	-	-	-		0
TAAR9	Q96RI9	TAAR9	173	TAAR9	TA3;TAR3;TRAR3	A (Rhodopsin)	Orphan receptors	Class A orphans												0	0	0	0	-	-	-	-		0
CALRL	Q16602	Calcitonin receptor-like	47	CALCRL	CGRPR	B1 (Secretin)	Peptide receptors	Calcitonin receptors												0	0	0	0	-	-	-	-		0
PTH2R	P49190	PTH2	332	PTH2R	PTHR2	B1 (Secretin)	Peptide receptors	Parathyroid hormone receptors												0	0	0	0	-	-	-	-		0
AGRL2	O95490	ADGRL2	207	ADGRL2	KIAA0786;LEC1;LPHH1;LPHN2	B2 (Adhesion)	Adhesion receptors	ADGRL												0	0	0	0	-	-	-	-		0
AGRL3	Q9HAR2	ADGRL3		ADGRL3	KIAA0768;	B2 (Adhesion)	Adhesion receptors	ADGRL												0	0	0	0	-	-	-	-		0
AGRL4	Q9HBW9	ADGRL4	181	ADGRL4	ELTD1;ETL;UNQ202/PRO228	B2 (Adhesion)	Adhesion receptors	ADGRL												0	0	0	0	-	-	-	-		0
AGRE1	Q14246	ADGRE1	182	ADGRE1	EMR1;TM7LN3	B2 (Adhesion)	Adhesion receptors	ADGRE												0	0	0	0	-	-	-	-		0
AGRE3	Q9BY15	ADGRE3	184	ADGRE3	EMR3;UNQ683/PRO1562	B2 (Adhesion)	Adhesion receptors	ADGRE												0	0	0	0	-	-	-	-		0
AGRE4	Q86SQ3	ADGRE4P	185	ADGRE4P	EMR4;EMR4P;GPR127;PGR16	B2 (Adhesion)	Adhesion receptors	ADGRE												0	0	0	0	-	-	-	-		0
AGRA1	Q86SQ6	ADGRA1	197	ADGRA1	GPR123;KIAA1828	B2 (Adhesion)	Adhesion receptors	ADGRA	G protein (identity unknown)	G protein (identity unknown)										0	0	0	0	-	-	-	-		0
AGRA2	Q96PE1	ADGRA2	198	ADGRA2	GPR124;KIAA1531;	B2 (Adhesion)	Adhesion receptors	ADGRA	G protein (identity unknown)	G protein (identity unknown)										0	0	0	0	-	-	-	-		0
AGRA3	Q8IWK6	ADGRA3	199	ADGRA3	GPR125;UNQ556/PRO1113	B2 (Adhesion)	Adhesion receptors	ADGRA	G protein (identity unknown)	G protein (identity unknown)										0	0	0	0	-	-	-	-		0
CELR1	Q9NYQ6	CELSR1	178	CELSR1	CDHF9;FMI2	B2 (Adhesion)	Adhesion receptors	ADGRC			Other - See Comments									0	0	0	0	-	-	-	-		0
CELR2	Q9HCU4	CELSR2	179	CELSR2	CDHF10;EGFL2;KIAA0279;MEGF3	B2 (Adhesion)	Adhesion receptors	ADGRC			Other - See Comments									0	0	0	0	-	-	-	-		0
CELR3	Q9NYQ7	CELSR3	180	CELSR3	CDHF11;EGFL1;FMI1;KIAA0812;MEGF2	B2 (Adhesion)	Adhesion receptors	ADGRC			Other - See Comments									0	0	0	0	-	-	-	-		0
AGRD2	Q7Z7M1	ADGRD2	204	ADGRD2	GPR144;PGR24	B2 (Adhesion)	Adhesion receptors	ADGRD	G protein (identity unknown)	G protein (identity unknown)										0	0	0	0	-	-	-	-		0
AGRF1	Q5T601	ADGRF1	190	ADGRF1	GPR110;PGR19	B2 (Adhesion)	Adhesion receptors	ADGRF												0	0	0	0	-	-	-	-		0
AGRF2	Q8IZF7	ADGRF2	191	ADGRF2	GPR111;PGR20	B2 (Adhesion)	Adhesion receptors	ADGRF												0	0	0	0	-	-	-	-		0
AGRF3	Q8IZF5	ADGRF3	193	ADGRF3	GPR113;PGR23;UNQ9196/PRO34000	B2 (Adhesion)	Adhesion receptors	ADGRF												0	0	0	0	-	-	-	-		0
AGRF4	Q8IZF3	ADGRF4	195	ADGRF4	GPR115;PGR18	B2 (Adhesion)	Adhesion receptors	ADGRF												0	0	0	0	-	-	-	-		0
AGRF5	Q8IZF2	ADGRF5	196	ADGRF5	GPR116;KIAA0758	B2 (Adhesion)	Adhesion receptors	ADGRF												0	0	0	0	-	-	-	-		0
AGRB1	O14514	ADGRB1	174	BAI1		B2 (Adhesion)	Adhesion receptors	ADGRB												0	0	0	0	-	-	-	-		0
AGRB2	O60241	ADGRB2	175	ADGRB2	BAI2	B2 (Adhesion)	Adhesion receptors	ADGRB												0	0	0	0	-	-	-	-		0
AGRB3	O60242	ADGRB3	176	ADGRB3	BAI3;KIAA0550	B2 (Adhesion)	Adhesion receptors	ADGRB												0	0	0	0	-	-	-	-		0
AGRG4	Q8IZF6	ADGRG4	192	ADGRG4	GPR112	B2 (Adhesion)	Adhesion receptors	ADGRG												0	0	0	0	-	-	-	-		0
AGRG5	Q8IZF4	ADGRG5	194	ADGRG5	GPR114;PGR27;UNQ2524/PRO6017	B2 (Adhesion)	Adhesion receptors	ADGRG												0	0	0	0	-	-	-	-		0
AGRG6	Q86SQ4	ADGRG6		ADGRG6	DREG;GPR126;VIGR	B2 (Adhesion)	Adhesion receptors	ADGRG												0	0	0	0	-	-	-	-		0
AGRG7	Q96K78	ADGRG7	201	ADGRG7	GPR128	B2 (Adhesion)	Adhesion receptors	ADGRG												0	0	0	0	-	-	-	-		0
AGRV1	Q8WXG9	ADGRV1		GPR98	KIAA0686;KIAA1943;MASS1;VLGR1	B2 (Adhesion)	Adhesion receptors	ADGRV												0	0	0	0	-	-	-	-		0
GABR1	Q9UBS5	GABAB1	240	GABBR1	GPRC3A	C (Glutamate)	Amino acid receptors	GABA<sub>B</sub> receptors					15240800		01:00:00					0	0	0	0	-	-	-	-		0
GABR2	O75899	GABAB2	241	GABBR2	GPR51;GPRC3B	C (Glutamate)	Amino acid receptors	GABA<sub>B</sub> receptors					2579700|8388192		02:00:00					0	0	0	0	-	-	-	-		0
TS1R1	Q7RTX1	TAS1R1	656	TAS1R1	GPR70;T1R1;TR1;GM148	C (Glutamate)	Sensory receptors	Taste 1 receptors												0	0	0	0	-	-	-	-		0
TS1R2	Q8TE23	TAS1R2	657	TAS1R2	GPR71;T1R2;TR2	C (Glutamate)	Sensory receptors	Taste 1 receptors												0	0	0	0	-	-	-	-		0
TS1R3	Q7RTX0	TAS1R3	658	TAS1R3	T1R3;TR3	C (Glutamate)	Sensory receptors	Taste 1 receptors												0	0	0	0	-	-	-	-		0
GP156	Q8NFN8	GPR156		GPR156	GABABL;PGR28	C (Glutamate)	Orphan receptors	Class C Orphans												0	0	0	0	-	-	-	-		0
GP158	Q5T848	GPR158		GPR158	KIAA1136	C (Glutamate)	Orphan receptors	Class C Orphans												0	0	0	0	-	-	-	-		0
GP179	Q6PRD1	GPR179		GPR179	GPR158L;GPR158L1	C (Glutamate)	Orphan receptors	Class C Orphans												0	0	0	0	-	-	-	-		0
RAI3	Q8NFJ5	GPRC5A		GPRC5A	GPCR5A;RAI3;RAIG1	C (Glutamate)	Orphan receptors	Class C Orphans												0	0	0	0	-	-	-	-		0
GPC5B	Q9NZH0	GPRC5B		GPRC5B	RAIG2	C (Glutamate)	Orphan receptors	Class C Orphans												0	0	0	0	-	-	-	-		0
GPC5C	Q9NQ84	GPRC5C		GPRC5C	RAIG3;PSEC0087	C (Glutamate)	Orphan receptors	Class C Orphans												0	0	0	0	-	-	-	-		0
GPC5D	Q9NZD1	GPRC5D		GPRC5D		C (Glutamate)	Orphan receptors	Class C Orphans												0	0	0	0	-	-	-	-		0
FZD5	Q13467	FZD5	233	FZD5	C2orf31	F (Frizzled)	Protein receptors	Frizzled												0	0	0	0	-	-	-	-		0
FZD8	Q9H461	FZD8	236	FZD8		F (Frizzled)	Protein receptors	Frizzled	G protein (identity unknown)		Other - See Comments									0	0	0	0	-	-	-	-		0
TA2R9	Q9NYW1	TAS2R9	665	TAS2R9		Taste 2	Sensory receptors	Taste 2 receptors												0	0	0	0	-	-	-	-		0
T2R10	Q9NYW0	TAS2R10	666	TAS2R10		Taste 2	Sensory receptors	Taste 2 receptors												0	0	0	0	-	-	-	-		0
TA2R8	Q9NYW2	TAS2R8	664	TAS2R8		Taste 2	Sensory receptors	Taste 2 receptors												0	0	0	0	-	-	-	-		0
TA2R1	Q9NYW7	TAS2R1	659	TAS2R1		Taste 2	Sensory receptors	Taste 2 receptors												0	0	0	0	-	-	-	-		0
TA2R3	Q9NYW6	TAS2R3	660	TAS2R3		Taste 2	Sensory receptors	Taste 2 receptors												0	0	0	0	-	-	-	-		0
TA2R4	Q9NYW5	TAS2R4	661	TAS2R4		Taste 2	Sensory receptors	Taste 2 receptors												0	0	0	0	-	-	-	-		0
TA2R5	Q9NYW4	TAS2R5	662	TAS2R5		Taste 2	Sensory receptors	Taste 2 receptors												0	0	0	0	-	-	-	-		0
TA2R7	Q9NYW3	TAS2R7	663	TAS2R7		Taste 2	Sensory receptors	Taste 2 receptors												0	0	0	0	-	-	-	-		0
T2R13	Q9NYV9	TAS2R13	667	TAS2R13		Taste 2	Sensory receptors	Taste 2 receptors												0	0	0	0	-	-	-	-		0
T2R14	Q9NYV8	TAS2R14	668	TAS2R14		Taste 2	Sensory receptors	Taste 2 receptors												0	0	0	0	-	-	-	-		0
T2R16	Q9NYV7	TAS2R16	669	TAS2R16		Taste 2	Sensory receptors	Taste 2 receptors												0	0	0	0	-	-	-	-		0
T2R19	P59542	TAS2R19	670	TAS2R19	TAS2R23;TAS2R48	Taste 2	Sensory receptors	Taste 2 receptors												0	0	0	0	-	-	-	-		0
T2R20	P59543	TAS2R20	671	TAS2R20	TAS2R49	Taste 2	Sensory receptors	Taste 2 receptors												0	0	0	0	-	-	-	-		0
T2R30	P59541	TAS2R30	673	TAS2R30	TAS2R47	Taste 2	Sensory receptors	Taste 2 receptors												0	0	0	0	-	-	-	-		0
T2R31	P59538	TAS2R31	674	TAS2R31	TAS2R44	Taste 2	Sensory receptors	Taste 2 receptors												0	0	0	0	-	-	-	-		0
T2R38	P59533	TAS2R38	682	TAS2R38	PTC	Taste 2	Sensory receptors	Taste 2 receptors												0	0	0	0	-	-	-	-		0
T2R39	P59534	TAS2R39	675	TAS2R39		Taste 2	Sensory receptors	Taste 2 receptors												0	0	0	0	-	-	-	-		0
T2R40	P59535	TAS2R40	676	TAS2R40	GPR60	Taste 2	Sensory receptors	Taste 2 receptors												0	0	0	0	-	-	-	-		0
T2R41	P59536	TAS2R41	680	TAS2R41		Taste 2	Sensory receptors	Taste 2 receptors												0	0	0	0	-	-	-	-		0
T2R42	Q7RTR8	TAS2R42	672	TAS2R42	TAS2R55	Taste 2	Sensory receptors	Taste 2 receptors												0	0	0	0	-	-	-	-		0
T2R43	P59537	TAS2R43	678	TAS2R43		Taste 2	Sensory receptors	Taste 2 receptors												0	0	0	0	-	-	-	-		0
T2R45	P59539	TAS2R45		TAS2R45	GPR59	Taste 2	Sensory receptors	Taste 2 receptors												0	0	0	0	-	-	-	-		0
T2R46	P59540	TAS2R46	679	TAS2R46		Taste 2	Sensory receptors	Taste 2 receptors												0	0	0	0	-	-	-	-		0
T2R50	P59544	TAS2R50	677	TAS2R50		Taste 2	Sensory receptors	Taste 2 receptors												0	0	0	0	-	-	-	-		0
T2R60	P59551	TAS2R60		TAS2R60		Taste 2	Sensory receptors	Taste 2 receptors												0	0	0	0	-	-	-	-		0
GP107	Q5VW38	GPR107		GPR107	KIAA1624;LUSTR1	Other GPCRs	Orphan receptors	Other GPCR orphans												0	0	0	0	-	-	-	-		0
G137A	Q96N19	GPR137		GPR137	C11orf4;GPR137A;TM7SF1L1	Other GPCRs	Orphan receptors	Other GPCR orphans												0	0	0	0	-	-	-	-		0
O51E1	Q8TCB6	#N/A		OR51E1	GPR164;OR51E1P;OR52A3P;POGR;PSGR2	Other GPCRs	Orphan receptors	Other GPCR orphans												0	0	0	0	-	-	-	-		0
TPRA1	Q86W33	TPRA1		TPRA1	GPR175;TMEM227;PP6566	Other GPCRs	Orphan receptors	Other GPCR orphans												0	0	0	0	-	-	-	-		0
GP143	P51810	GPR143		GPR143	OA1	Other GPCRs	Orphan receptors	Other GPCR orphans												0	0	0	0	-	-	-	-		0
GP157	Q5UAW9	GPR157		GPR157		Other GPCRs	Orphan receptors	Other GPCR orphans												0	0	0	0	-	-	-	-		0
STE2_YEAST	D6VTK4	#N/A		STE2		D1 (Ste2-like fungal pheromone)	Ste2-like receptors	STE2	GPa1											0	0	0	0	-	-	-	-		0
5HT1A	P08908	5-HT1A	1	HTR1A	ADRB2RL1;ADRBRL1	A (Rhodopsin)	Aminergic receptors	5-Hydroxytryptamine receptors	Gi/o		Adenylate cyclase inhibition	Phospholipase C stimulation	2549039|10585418|12145108	2549039	03:00:00		Gi/o			0	1	0	0	-	G	-	-	3	1
5HT1B	P28222	5-HT1B	2	HTR1B	HTR1DB	A (Rhodopsin)	Aminergic receptors	5-Hydroxytryptamine receptors	Gi/o		Adenylate cyclase inhibition		9840417|12145108		02:00:00		Gi/o			0	1	0	0	-	G	-	-	3	1
5HT1D	P28221	5-HT1D	3	HTR1D	HTR1DA;HTRL	A (Rhodopsin)	Aminergic receptors	5-Hydroxytryptamine receptors	Gi/o		Adenylate cyclase inhibition		12145108|1652050		02:00:00		Gi/o			0	1	0	0	-	G	-	-	3	1
5HT1E	P28566	5-HT1E	4	HTR1E		A (Rhodopsin)	Aminergic receptors	5-Hydroxytryptamine receptors	Gi/o		Adenylate cyclase inhibition		7984278		01:00:00		Gi/o			0	1	0	0	-	G	-	-	3	1
5HT1F	P30939	5-HT1F	5	HTR1F	HTR1EL	A (Rhodopsin)	Aminergic receptors	5-Hydroxytryptamine receptors	Gi/o		Adenylate cyclase inhibition		8133900		01:00:00		Gi/o			0	1	0	0	-	G	-	-	3	1
5HT2A	P28223	5-HT2A	6	HTR2A	HTR2	A (Rhodopsin)	Aminergic receptors	5-Hydroxytryptamine receptors	Gq/11	Gi/o	Phospholipase C stimulation	Adenylate cyclase inhibition	11976386|7651356	7651356	02:00:00		Gi/o	Gq/11		0	2	1	0	-	G	G	-	2	1
5HT2B	P41595	5-HT2B	7	HTR2B		A (Rhodopsin)	Aminergic receptors	5-Hydroxytryptamine receptors	Gq/11				8621713|7700243		02:00:00			Gq/11		0	0	1	0	-	-	G	-	3	1
5HT2C	P28335	5-HT2C	8	HTR2C	HTR1C	A (Rhodopsin)	Aminergic receptors	5-Hydroxytryptamine receptors	Gq/11	Gi/o	Phospholipase C stimulation	Adenylate cyclase inhibition	8809227|11976386|2940597	8809227	03:00:00		Gi/o	Gq/11		0	2	1	0	-	G	G	-	2	1
5HT4R	Q13639	5-HT4	9	HTR4		A (Rhodopsin)	Aminergic receptors	5-Hydroxytryptamine receptors	Gs	G12/13	Adenylate cyclase stimulation, Calcium channel, Other - See Comments	Other - See Comments	2849052|2314390|1319906|2169944|1311410|7965722|12819788	11923294	07:00:00	Gs			G12/13	1	0	0	2	G	-	-	G	2	1
5HT5A	P47898	5-HT5A	10	HTR5A		A (Rhodopsin)	Aminergic receptors	5-Hydroxytryptamine receptors	Gi/o	Gq/11	Adenylate cyclase inhibition	Phospholipase C stimulation	9720796|9865521	12558985	02:00:00		Gi/o	Gq/11		0	1	2	0	-	G	G	-	2	1
5HT6R	P50406	5-HT6	11	HTR6		A (Rhodopsin)	Aminergic receptors	5-Hydroxytryptamine receptors	Gs	Gq/11	Adenylate cyclase stimulation	Phospholipase C stimulation	12860470	12860470	01:00:00	Gs		Gq/11		1	0	2	0	G	-	G	-	2	1
5HT7R	P34969	5-HT7	12	HTR7		A (Rhodopsin)	Aminergic receptors	5-Hydroxytryptamine receptors	Gs		Adenylate cyclase stimulation		9651336		01:00:00	Gs				1	0	0	0	G	-	-	-	3	1
ACM1	P11229	M1	13	CHRM1		A (Rhodopsin)	Aminergic receptors	Acetylcholine receptors (muscarinic)	Gq/11		Phospholipase C stimulation		8441322|8626481|8925880|2841607		04:00:00			Gq/11		0	0	1	0	-	-	G	-	3	1
ACM2	P08172	M2	14	CHRM2		A (Rhodopsin)	Aminergic receptors	Acetylcholine receptors (muscarinic)	Gi/o	Gs, Gq/11	Adenylate cyclase inhibition	Adenylate cyclase stimulation, Phospholipase C stimulation	7608168|2841607	17065363|17392404	02:00:00	Gs	Gi/o	Gq/11		2	1	2	0	G	G	G	-	1	1
DRD2	P14416	D2	215	DRD2		A (Rhodopsin)	Aminergic receptors	Dopamine receptors	Gi/o, G protein independent mechanism		Adenylate cyclase inhibition, Other - See Comments	Potassium channel, Other - See Comments	11248120|1849644|6344565	2552081	03:00:00		Gi/o			0	1	0	0	-	G	-	-	3	1
ACM3	P20309	M3	15	CHRM3		A (Rhodopsin)	Aminergic receptors	Acetylcholine receptors (muscarinic)	Gq/11		Phospholipase C stimulation		8925880|2841607		02:00:00			Gq/11		0	0	1	0	-	-	G	-	3	1
ACM4	P08173	M4	16	CHRM4		A (Rhodopsin)	Aminergic receptors	Acetylcholine receptors (muscarinic)	Gi/o		Adenylate cyclase inhibition		7608168|2841607		02:00:00		Gi/o			0	1	0	0	-	G	-	-	3	1
ACM5	P08912	M5	17	CHRM5		A (Rhodopsin)	Aminergic receptors	Acetylcholine receptors (muscarinic)	Gq/11		Phospholipase C stimulation		8925880		01:00:00			Gq/11		0	0	1	0	-	-	G	-	3	1
ADA1A	P35348	α1A	22	ADRA1A	ADRA1C	A (Rhodopsin)	Aminergic receptors	Adrenoceptors	Gq/11	G12/13	Phospholipase C stimulation, Calcium channel, Other - See Comments	Phospholipase A2 stimulation, Phospholipase D stimulation, Other - See Comments	14609720|11337028	14609720|14761886|11337028|14736339	02:00:00			Gq/11	G12/13	0	0	1	2	-	-	G	G	2	1
ADA1B	P35368	α1B	23	ADRA1B		A (Rhodopsin)	Aminergic receptors	Adrenoceptors	Gq/11		Phospholipase C stimulation, Calcium channel, Other - See Comments	Phospholipase D stimulation, Other - See Comments	11337028|14609720	11337028|14609720	02:00:00			Gq/11		0	0	1	0	-	-	G	-	3	1
ADA1D	P25100	α1D	24	ADRA1D	ADRA1A	A (Rhodopsin)	Aminergic receptors	Adrenoceptors	Gq/11		Phospholipase C stimulation, Calcium channel, Other - See Comments	Phospholipase D stimulation, Other - See Comments	11337028|14609720	11337028|14609720	02:00:00			Gq/11		0	0	1	0	-	-	G	-	3	1
ADA2A	P08913	α2A	25	ADRA2A	ADRA2R;ADRAR	A (Rhodopsin)	Aminergic receptors	Adrenoceptors	Gi/o	Gs	Adenylate cyclase inhibition, Potassium channel, Calcium channel, Phospholipase A2 stimulation	Adenylate cyclase stimulation	2553931|2840317|1847497	1322406	03:00:00	Gs	Gi/o			2	1	0	0	G	G	-	-	2	1
ADA2B	P18089	α2B	26	ADRA2B	ADRA2L1;ADRA2RL1	A (Rhodopsin)	Aminergic receptors	Adrenoceptors	Gi/o	Gs	Adenylate cyclase inhibition, Potassium channel, Calcium channel	Adenylate cyclase stimulation	2553931|2840317	1322406	02:00:00	Gs	Gi/o			2	1	0	0	G	G	-	-	2	1
ADA2C	P18825	α2C	27	ADRA2C	ADRA2L2;ADRA2RL2	A (Rhodopsin)	Aminergic receptors	Adrenoceptors	Gi/o	Gs	Adenylate cyclase inhibition, Potassium channel, Calcium channel	Adenylate cyclase stimulation	2553931|2840317	1322406	02:00:00	Gs	Gi/o			2	1	0	0	G	G	-	-	2	1
ADRB1	P08588	β1	28	ADRB1	ADRB1R;B1AR	A (Rhodopsin)	Aminergic receptors	Adrenoceptors	Gs	Gi/o	Adenylate cyclase stimulation	Guanylate cyclase stimulation	12106601|6143332	14711933	02:00:00	Gs	Gi/o			1	2	0	0	G	G	-	-	2	1
ADRB2	P07550	β2	29	ADRB2	ADRB2R;B2AR	A (Rhodopsin)	Aminergic receptors	Adrenoceptors	Gs	Gi/o	Adenylate cyclase stimulation	Guanylate cyclase stimulation	9716378|14711933|12106601|6143332	14711933	04:00:00	Gs	Gi/o			1	2	0	0	G	G	-	-	2	1
ADRB3	P13945	β3	30	ADRB3	ADRB3R;B3AR	A (Rhodopsin)	Aminergic receptors	Adrenoceptors	Gs	Gi/o	Adenylate cyclase stimulation	Adenylate cyclase inhibition, Guanylate cyclase stimulation	14551227|9717730|b3-adrenergic regulation of cardiac L-type Ca2+ current in human atrial myocytes.	14711933|10974023|10498836	03:00:00	Gs	Gi/o			1	2	0	0	G	G	-	-	2	1
DRD1	P21728	D1	214	DRD1		A (Rhodopsin)	Aminergic receptors	Dopamine receptors	Gs	Gs	Adenylate cyclase stimulation	Calcium channel, Other - See Comments	4401122	17318879|12466426	01:00:00	Gs				1	0	0	0	G	-	-	-	3	1
DRD3	P35462	D3	216	DRD3		A (Rhodopsin)	Aminergic receptors	Dopamine receptors	Gi/o		Adenylate cyclase inhibition, Potassium channel		8302280|7957635|7907363|1330688|8890457		05:00:00		Gi/o			0	1	0	0	-	G	-	-	3	1
DRD4	P21917	D4	217	DRD4		A (Rhodopsin)	Aminergic receptors	Dopamine receptors	Gi/o		Adenylate cyclase inhibition		10432116		01:00:00		Gi/o			0	1	0	0	-	G	-	-	3	1
DRD5	P21918	D5	218	DRD5	DRD1B;DRD1L2	A (Rhodopsin)	Aminergic receptors	Dopamine receptors	Gs		Adenylate cyclase stimulation		1826762|1831904|1834671		03:00:00	Gs				1	0	0	0	G	-	-	-	3	1
HRH1	P35367	H1	262	HRH1		A (Rhodopsin)	Aminergic receptors	Histamine receptors	Gq/11	Gq/11	Adenylate cyclase stimulation	Phospholipase C stimulation	16189696	7695921	01:00:00			Gq/11		0	0	1	0	-	-	G	-	3	1
HRH2	P25021	H2	263	HRH2		A (Rhodopsin)	Aminergic receptors	Histamine receptors	Gq/11	Gs	Phospholipase C stimulation	Adenylate cyclase stimulation	8961278|2553705	8961278|2553705	02:00:00	Gs		Gq/11		2	0	1	0	G	-	G	-	2	1
HRH3	Q9Y5N1	H3	264	HRH3	GPCR97	A (Rhodopsin)	Aminergic receptors	Histamine receptors	Gi/o		Adenylate cyclase inhibition		8838460|8023737		02:00:00		Gi/o			0	1	0	0	-	G	-	-	3	1
HRH4	Q9H3N8	H4	265	HRH4	GPCR105	A (Rhodopsin)	Aminergic receptors	Histamine receptors	Gi/o		Phospholipase C stimulation		12626656		01:00:00		Gi/o			0	1	0	0	-	G	-	-	3	1
TAAR1	Q96RJ0	TA1	364	TAAR1	TA1;TAR1;TRAR1	A (Rhodopsin)	Aminergic receptors	Trace amine receptors	Gs	Gq/11	Adenylate cyclase stimulation		11459929|11723224|15718104		03:00:00	Gs		Gq/11		1	0	2	0	G	-	G	-	2	1
AGTR1	P30556	AT1	34	AGTR1	AGTR1A;AGTR1B;AT2R1;AT2R1B	A (Rhodopsin)	Peptide receptors	Angiotensin receptors	Gi/o, Gq/11		Adenylate cyclase inhibition, Phospholipase C stimulation, Calcium channel, Phospholipase A2 stimulation, Phospholipase D stimulation, Other - See Comments		10977869		01:00:00		Gi/o	Gq/11		0	1	1	0	-	G	G	-	2	1
AGTR2	P50052	AT2	35	AGTR2		A (Rhodopsin)	Peptide receptors	Angiotensin receptors	Gi/o	Gi/o	Phospholipase A2 stimulation, Other - See Comments	Other - See Comments	9892143|8106454|8663053		03:00:00		Gi/o			0	1	0	0	-	G	-	-	3	1
APJ	P35414	APLNR	36	APLNR	AGTRL1;APJ	A (Rhodopsin)	Peptide receptors	Apelin receptors	Gi/o		Adenylate cyclase inhibition		10777510|10525157|11779205|10871767|15385434		05:00:00		Gi/o			0	1	0	0	-	G	-	-	3	1
NMBR	P28336	BB1	38	NMBR		A (Rhodopsin)	Peptide receptors	Bombesin receptors	Gq/11		Phospholipase C stimulation		1336112		01:00:00			Gq/11		0	0	1	0	-	-	G	-	3	1
GRPR	P30550	BB2	39	GRPR		A (Rhodopsin)	Peptide receptors	Bombesin receptors	Gq/11	G protein (identity unknown)	Phospholipase C stimulation, Phospholipase A2 stimulation, Phospholipase D stimulation	Adenylate cyclase stimulation, Phospholipase A2 stimulation, Phospholipase D stimulation	23220008|17349623|9530154|9688642|8842515|10347243	8129732|1532578|9194577	06:00:00			Gq/11		0	0	1	0	-	-	G	-	3	1
BRS3	P32247	BB3	40	BRS3		A (Rhodopsin)	Peptide receptors	Bombesin receptors	Gq/11	G protein (identity unknown)	Phospholipase C stimulation, Phospholipase D stimulation, Other - See Comments	Other - See Comments	20467915|22127929|9593699|9765358|10689196		05:00:00			Gq/11		0	0	1	0	-	-	G	-	3	1
BKRB1	P46663	B1	41	BDKRB1	BRADYB1	A (Rhodopsin)	Peptide receptors	Bradykinin receptors	Gi/o, Gq/11		Adenylate cyclase inhibition, Phospholipase C stimulation		9111052		01:00:00		Gi/o	Gq/11		0	1	1	0	-	G	G	-	2	1
BKRB2	P30411	B2	42	BDKRB2	BKR2	A (Rhodopsin)	Peptide receptors	Bradykinin receptors	Gs, Gi/o, Gq/11		Adenylate cyclase inhibition, Phospholipase C stimulation, Phospholipase A2 stimulation		1657928|8458876|8227332|7946358|10422787|2560387|2159473|10364236		08:00:00	Gs	Gi/o	Gq/11		1	1	1	0	G	G	G	-	1	1
CCKAR	P32238	CCK1	76	CCKAR	CCKRA	A (Rhodopsin)	Peptide receptors	Cholecystokinin receptors	Gq/11	Gs	Phospholipase C stimulation	Adenylate cyclase stimulation	8503909|8343165	7678554	02:00:00	Gs		Gq/11		2	0	1	0	G	-	G	-	2	1
GASR	P32239	CCK2	77	CCKBR	CCKRB	A (Rhodopsin)	Peptide receptors	Cholecystokinin receptors	Gq/11		Phospholipase C stimulation		7681836		01:00:00			Gq/11		0	0	1	0	-	-	G	-	3	1
C5AR1	P21730	C5a1	32	C5AR1	C5AR;C5R1	A (Rhodopsin)	Peptide receptors	Complement peptide receptors	Gi/o, G protein (identity unknown)	Gq/11	Phospholipase C stimulation, Other - See Comments	Phospholipase C stimulation	2123189	7870028	01:00:00		Gi/o	Gq/11		0	1	2	0	-	G	G	-	2	1
EDNRA	P25101	ETA	219	EDNRA	ETA;ETRA	A (Rhodopsin)	Peptide receptors	Endothelin receptors	Gq/11		Phospholipase C stimulation, Phospholipase A2 stimulation, Phospholipase D stimulation		7882989|9226297|Cell signalling by endothelin peptides.|Endothelin receptors and signalling mechanisms.		04:00:00			Gq/11		0	0	1	0	-	-	G	-	3	1
EDNRB	P24530	ETB	220	EDNRB	ETRB	A (Rhodopsin)	Peptide receptors	Endothelin receptors	Gs, Gi/o, Gq/11		Phospholipase C stimulation, Phospholipase A2 stimulation, Phospholipase D stimulation		9226297|Endothelin receptors and signalling mechanisms.|Cell signalling by endothelin peptides.|7882989		04:00:00	Gs	Gi/o	Gq/11		1	1	1	0	G	G	G	-	1	1
FPR1	P21462	FPR1	222	FPR1		A (Rhodopsin)	Peptide receptors	Formylpeptide receptors	Gi/o		Adenylate cyclase inhibition, Phospholipase C stimulation, Phospholipase A2 stimulation, Phospholipase D stimulation	Calcium channel	7499283|3113327|8315346|18453106	11128053|558197|11689885|6310757	04:00:00		Gi/o			0	1	0	0	-	G	-	-	3	1
FPR2	P25090	FPR2/ALX	223	FPR2	FPRH1;FPRL1;LXA4R	A (Rhodopsin)	Peptide receptors	Formylpeptide receptors	Gi/o	Gq/11	Phospholipase C stimulation, Phospholipase A2 stimulation, Phospholipase D stimulation	Phospholipase C stimulation, Phospholipase A2 stimulation, Phospholipase D stimulation, Other - See Comments	8006586|8389617|8662841|2983319|11689885|17191385	11689885|17191385	06:00:00		Gi/o	Gq/11		0	1	2	0	-	G	G	-	2	1
FPR3	P25089	FPR3	224	FPR3	FPRH1;FPRL2	A (Rhodopsin)	Peptide receptors	Formylpeptide receptors	Gi/o		Phospholipase A2 stimulation						Gi/o			0	1	0	0	-	G	-	-	3	1
GALR1	P47211	GAL1	243	GALR1	GALNR;GALNR1	A (Rhodopsin)	Peptide receptors	Galanin receptors	Gi/o		Adenylate cyclase inhibition, Potassium channel		9578534|7524088|8750821|9722565		04:00:00		Gi/o			0	1	0	0	-	G	-	-	3	1
GALR2	O43603	GAL2	244	GALR2	GALNR2	A (Rhodopsin)	Peptide receptors	Galanin receptors	Gq/11	Gi/o, G12/13	Phospholipase C stimulation	Adenylate cyclase inhibition, Other - See Comments	9880084|9578584|9685625|9427506|9832122|9305929|10980593	9578584|9685625|9281594	07:00:00		Gi/o	Gq/11	G12/13	0	2	1	2	-	G	G	G	1	1
GALR3	O60755	GAL3	245	GALR3	GALNR3	A (Rhodopsin)	Peptide receptors	Galanin receptors	Gi/o		Adenylate cyclase inhibition, Potassium channel		9832121|9722565		02:00:00		Gi/o			0	1	0	0	-	G	-	-	3	1
GHSR	Q92847	Ghrelin	246	GHSR		A (Rhodopsin)	Peptide receptors	Ghrelin receptors	Gq/11	Gi/o, G12/13, G protein independent mechanism	Phospholipase C stimulation	Other - See Comments	22117076|20556829	22117076|15905359|21402696	02:00:00		Gi/o	Gq/11	G12/13	0	2	1	2	-	G	G	G	1	1
GNRHR	P30968	GnRH1	256	GNRHR	GRHR	A (Rhodopsin)	Peptide receptors	Gonadotrophin-releasing hormone receptors	Gq/11	Gi/o	Phospholipase C stimulation	Other - See Comments	8898346|8058044	15082521	02:00:00		Gi/o	Gq/11		0	2	1	0	-	G	G	-	2	1
KISSR	Q969F8	Kisspeptin	266	KISS1R	AXOR12;GPR54	A (Rhodopsin)	Peptide receptors	Kisspeptin receptors	Gq/11		Phospholipase C stimulation		15596153|11414709|11457843|11387329		04:00:00			Gq/11		0	0	1	0	-	-	G	-	3	1
MCHR1	Q99705	MCH1	280	MCHR1	GPR24;SLC1	A (Rhodopsin)	Peptide receptors	Melanin-concentrating hormone	Gs, Gi/o, Gq/11		Adenylate cyclase inhibition, Phospholipase C stimulation		10421368|11108264|12865333|11708774		04:00:00	Gs	Gi/o	Gq/11		1	1	1	0	G	G	G	-	1	1
MCHR2	Q969V1	MCH2	281	MCHR2	GPR145;SLT	A (Rhodopsin)	Peptide receptors	Melanin-concentrating hormone	Gq/11		Adenylate cyclase inhibition, Phospholipase C stimulation		11404457		01:00:00			Gq/11		0	0	1	0	-	-	G	-	3	1
MSHR	Q01726	MC1	282	MC1R	MSHR	A (Rhodopsin)	Peptide receptors	Melanocortin receptors	Gs	G protein (identity unknown)	Adenylate cyclase stimulation	Other - See Comments	8187950	11161002	01:00:00	Gs				1	0	0	0	G	-	-	-	3	1
ACTHR	Q01718	MC2	283	MC2R	ACTHR	A (Rhodopsin)	Peptide receptors	Melanocortin receptors	Gs	G protein (identity unknown)	Adenylate cyclase stimulation	Calcium channel	9175632	2579947	01:00:00	Gs				1	0	0	0	G	-	-	-	3	1
MC3R	P41968	MC3	284	MC3R		A (Rhodopsin)	Peptide receptors	Melanocortin receptors	Gs	G protein (identity unknown)	Adenylate cyclase stimulation	Other - See Comments	8463333	11161002|12906838	01:00:00	Gs				1	0	0	0	G	-	-	-	3	1
MC4R	P32245	MC4	285	MC4R		A (Rhodopsin)	Peptide receptors	Melanocortin receptors	Gs	G protein (identity unknown)	Adenylate cyclase stimulation	Other - See Comments	8463333|7854347	11161002	02:00:00	Gs				1	0	0	0	G	-	-	-	3	1
MC5R	P33032	MC5	286	MC5R		A (Rhodopsin)	Peptide receptors	Melanocortin receptors	Gs	G protein (identity unknown)	Adenylate cyclase stimulation	Other - See Comments	8161509	11161002	01:00:00	Gs				1	0	0	0	G	-	-	-	3	1
MTLR	O43193	motilin	297	MLNR	GPR38;MTLR;MTLR1	A (Rhodopsin)	Peptide receptors	Motilin receptors	Gq/11, G12/13		Phospholipase C stimulation							Gq/11	G12/13	0	0	1	1	-	-	G	G	2	1
NMUR1	Q9HB89	NMU1	298	NMUR1	GPR66	A (Rhodopsin)	Peptide receptors	Neuromedin U receptors	Gq/11		Phospholipase C stimulation		15292653|15331768|22832358|10899166|10811630|22493291		06:00:00			Gq/11		0	0	1	0	-	-	G	-	3	1
NMUR2	Q9GZQ4	NMU2	299	NMUR2	NMU2R;TGR1	A (Rhodopsin)	Peptide receptors	Neuromedin U receptors	Gq/11		Phospholipase C stimulation		15292653|15331768|22832358|10899166|11010960|10811630|22493291		07:00:00			Gq/11		0	0	1	0	-	-	G	-	3	1
NPFF1	Q9GZQ6	NPFF1	300	NPFFR1	GPR147;NPFF1	A (Rhodopsin)	Peptide receptors	Neuropeptide FF/neuropeptide AF receptors	Gi/o		Adenylate cyclase inhibition, Calcium channel, Other - See Comments		16488058|12242085		02:00:00		Gi/o			0	1	0	0	-	G	-	-	3	1
NPFF2	Q9Y5X5	NPFF2	301	NPFFR2	GPR74;NPFF2;NPGPR	A (Rhodopsin)	Peptide receptors	Neuropeptide FF/neuropeptide AF receptors	Gi/o		Adenylate cyclase inhibition, Calcium channel, Other - See Comments		12242085|15608144		02:00:00		Gi/o			0	1	0	0	-	G	-	-	3	1
NPSR1	Q6W5P4	NPS	302	NPSR1	GPR154;GPRA;PGR14	A (Rhodopsin)	Peptide receptors	Neuropeptide S receptors	Gq/11	Gs	Phospholipase C stimulation	Adenylate cyclase stimulation	16790440|17696420|15312648	14757815|16144971	03:00:00	Gs		Gq/11		2	0	1	0	G	-	G	-	2	1
NPBW1	P48145	NPBW1	303	NPBWR1	GPR7	A (Rhodopsin)	Peptide receptors	Neuropeptide W/neuropeptide B receptors	Gi/o		Adenylate cyclase inhibition		12130646|12118011|12401809|12719537		04:00:00		Gi/o			0	1	0	0	-	G	-	-	3	1
NPBW2	P48146	NPBW2	304	NPBWR2	GPR8	A (Rhodopsin)	Peptide receptors	Neuropeptide W/neuropeptide B receptors	Gi/o		Adenylate cyclase inhibition		12130646|12401809|12719537		03:00:00		Gi/o			0	1	0	0	-	G	-	-	3	1
NPY1R	P25929	Y1	305	NPY1R	NPYR;NPYY1	A (Rhodopsin)	Peptide receptors	Neuropeptide Y receptors	Gi/o		Adenylate cyclase inhibition		1316999|1321422|7623780|15308651		04:00:00		Gi/o			0	1	0	0	-	G	-	-	3	1
CXCR1	P25024	CXCR1	68	CXCR1	CMKAR1;IL8RA	A (Rhodopsin)	Protein receptors	Chemokine receptors	Gi/o	Gq/11	Adenylate cyclase inhibition, Calcium channel	Calcium channel, Phospholipase D stimulation, Other - See Comments	9915816|10188995|12627953	10188995|8692878	03:00:00		Gi/o	Gq/11		0	1	2	0	-	G	G	-	2	1
NPY2R	P49146	Y2	306	NPY2R		A (Rhodopsin)	Peptide receptors	Neuropeptide Y receptors	Gi/o	Gq/11	Adenylate cyclase inhibition, Calcium channel	Phospholipase C stimulation	8132619|15308651	15308651	02:00:00		Gi/o	Gq/11		0	1	2	0	-	G	G	-	2	1
NPY4R	P50391	Y4	307	NPY4R	PPYR1	A (Rhodopsin)	Peptide receptors	Neuropeptide Y receptors	Gi/o	Gq/11	Adenylate cyclase inhibition	Phospholipase C stimulation	15308651|10640301|9210181	15308651	03:00:00		Gi/o	Gq/11		0	1	2	0	-	G	G	-	2	1
NPY5R	Q15761	Y5	308	NPY5R	NPYR5	A (Rhodopsin)	Peptide receptors	Neuropeptide Y receptors	Gi/o		Adenylate cyclase inhibition		11287093		01:00:00		Gi/o			0	1	0	0	-	G	-	-	3	1
NTR1	P30989	NTS1	309	NTSR1	NTRR	A (Rhodopsin)	Peptide receptors	Neurotensin receptors	Gq/11	Gs, Gi/o	Phospholipase C stimulation	Adenylate cyclase stimulation, Adenylate cyclase inhibition, Guanylate cyclase stimulation, Other - See Comments	1331689|11042263|1328536|3011505|8528577|3018165|3040912	11042263|8380559|8528577|2988544|6329783|3010077	07:00:00	Gs	Gi/o	Gq/11		2	2	1	0	G	G	G	-	1	1
NTR2	O95665	NTS2	310	NTSR2		A (Rhodopsin)	Peptide receptors	Neurotensin receptors	Gq/11		Phospholipase C stimulation		9080465|8795617	12084713|15361549	02:00:00			Gq/11		0	0	1	0	-	-	G	-	3	1
OPRD	P41143	𝛅	317	OPRD1	OPRD	A (Rhodopsin)	Peptide receptors	Opioid receptors	Gi/o		Adenylate cyclase inhibition, Phospholipase C stimulation, Potassium channel, Calcium channel, Other - See Comments		12558970|10836142|15155836|15464054		04:00:00		Gi/o			0	1	0	0	-	G	-	-	3	1
OPRK	P41145	𝜅	318	OPRK1	OPRK	A (Rhodopsin)	Peptide receptors	Opioid receptors	Gi/o	Gi/o, G12/13	Adenylate cyclase inhibition, Potassium channel, Calcium channel	Adenylate cyclase inhibition, Phospholipase C stimulation, Other - See Comments	7700253|7700508|8103800|2828959|8381004|2906610|7902584|7931552	8863832|7494457|9572309|7875310|10646507|15070904	08:00:00		Gi/o		G12/13	0	1	0	2	-	G	-	G	2	1
OPRM	P35372	μ	319	OPRM1	MOR1	A (Rhodopsin)	Peptide receptors	Opioid receptors	Gi/o	Gq/11	Adenylate cyclase stimulation, Adenylate cyclase inhibition, Phospholipase C stimulation, Potassium channel, Calcium channel, Phospholipase A2 stimulation, Phospholipase D stimulation, Other - See Comments	Phospholipase C stimulation	9030567|8643659|8097884|7595566|10323586|8752140|8637576|12519790|12496346|7643119|8863832|2440052|8863841|7746271|7996199|7494457|8700117	12077485|9572309	17:00:00		Gi/o	Gq/11		0	1	2	0	-	G	G	-	2	1
OPRX	P41146	NOP	320	OPRL1	OOR;ORL1	A (Rhodopsin)	Peptide receptors	Opioid receptors	Gi/o	Gi/o	Adenylate cyclase inhibition, Potassium channel, Calcium channel, Other - See Comments	Adenylate cyclase inhibition	7566152|7481766|9353393|11027224|8735615		05:00:00		Gi/o			0	1	0	0	-	G	-	-	3	1
OX1R	O43613	OX1	321	HCRTR1		A (Rhodopsin)	Peptide receptors	Orexin receptors	Gs, Gi/o, Gq/11		Adenylate cyclase stimulation, Adenylate cyclase inhibition, Phospholipase C stimulation		12606634|12702704|12208495|18488139|27237973|26582739|Intracellular Signal Pathways Utilized by the Hypocretin/Orexin Receptors.|14691055|10880509|16430869|15683363|17050705|9491897|10498827|20002100|22550093|18198212		17:00:00	Gs	Gi/o	Gq/11		1	1	1	0	G	G	G	-	1	1
OX2R	O43614	OX2	322	HCRTR2		A (Rhodopsin)	Peptide receptors	Orexin receptors	Gs, Gi/o, Gq/11		Adenylate cyclase stimulation, Adenylate cyclase inhibition, Phospholipase C stimulation		12606634|21378163|12702704|12208495|11549701|11600545|9491897|18599270		08:00:00	Gs	Gi/o	Gq/11		1	1	1	0	G	G	G	-	1	1
QRFPR	Q96P65	QRFP	333	QRFPR	GPR103	A (Rhodopsin)	Peptide receptors	Peptide P518 receptors	Gi/o, Gq/11		Adenylate cyclase inhibition, Phospholipase C stimulation		12960173|12714592		02:00:00		Gi/o	Gq/11		0	1	1	0	-	G	G	-	2	1
RXFP1	Q9HBX9	RXFP1	351	RXFP1	LGR7	A (Rhodopsin)	Peptide receptors	Relaxin family peptide receptors	Gs, Gi/o	Gs, Gi/o	Adenylate cyclase stimulation, Adenylate cyclase inhibition	Guanylate cyclase stimulation, Other - See Comments	17509748|11517286|15956719|16569707|20664520|19029286|18805799|10935549|11809971|10235632|15956721|15604116|12595573	22835547|24098703|15215200|17522128|9622136|22936987|12522118|15289446|19289144|22510373|19073841|12646076|23704950|11967993	13:00:00	Gs	Gi/o			1	1	0	0	G	G	-	-	2	1
RXFP2	Q8WXD0	RXFP2	352	RXFP2	GPR106;GREAT;LGR8	A (Rhodopsin)	Peptide receptors	Relaxin family peptide receptors	Gs, Gi/o		Adenylate cyclase stimulation, Adenylate cyclase inhibition		16569707|15649866|11809971|15123806|12114498|12506116		06:00:00	Gs	Gi/o			1	1	0	0	G	G	-	-	2	1
RL3R1	Q9NSD7	RXFP3	353	RXFP3	RLN3R1;SALPR	A (Rhodopsin)	Peptide receptors	Relaxin family peptide receptors	Gi/o		Adenylate cyclase inhibition, Other - See Comments		23303914|15367576|15465925|14522968|15525639		05:00:00		Gi/o			0	1	0	0	-	G	-	-	3	1
RL3R2	Q8TDU9	RXFP4	354	RXFP4	GPR100;RLN3R2	A (Rhodopsin)	Peptide receptors	Relaxin family peptide receptors	Gi/o	Gi/o	Adenylate cyclase inhibition, Other - See Comments	Calcium channel, Other - See Comments	27243554|15465925|14522967|15525639	27243554|15525639|25514935	04:00:00		Gi/o			0	1	0	0	-	G	-	-	3	1
SSR1	P30872	SST1	355	SSTR1		A (Rhodopsin)	Peptide receptors	Somatostatin receptors	Gi/o	G protein (identity unknown)	Adenylate cyclase inhibition	Other - See Comments	8144617|8405411|10598790	7907795|8144617|12566440	03:00:00		Gi/o			0	1	0	0	-	G	-	-	3	1
SSR2	P30874	SST2	356	SSTR2		A (Rhodopsin)	Peptide receptors	Somatostatin receptors	Gi/o		Adenylate cyclase inhibition, Potassium channel, Calcium channel		8144617|8405411|7538774|10598790		04:00:00		Gi/o			0	1	0	0	-	G	-	-	3	1
SSR3	P32745	SST3	357	SSTR3		A (Rhodopsin)	Peptide receptors	Somatostatin receptors	Gi/o		Adenylate cyclase inhibition		8405411|10598790|1328199		03:00:00		Gi/o			0	1	0	0	-	G	-	-	3	1
SSR4	P31391	SST4	358	SSTR4		A (Rhodopsin)	Peptide receptors	Somatostatin receptors	Gi/o	Gi/o, G protein (identity unknown)	Adenylate cyclase inhibition	Potassium channel, Calcium channel, Other - See Comments	8175684|8100352|7905265|10598790	8175684|25483286|20573967|24810884|9426226|9809748|12566440|18385315|25445035|10347203|9831922|10486283|24743707	04:00:00		Gi/o			0	1	0	0	-	G	-	-	3	1
SSR5	P35346	SST5	359	SSTR5		A (Rhodopsin)	Peptide receptors	Somatostatin receptors	Gi/o		Adenylate cyclase inhibition, Potassium channel, Calcium channel		23418396|10598790		02:00:00		Gi/o			0	1	0	0	-	G	-	-	3	1
NK1R	P25103	NK1	360	TACR1	NK1R;TAC1R	A (Rhodopsin)	Peptide receptors	Tachykinin receptors	Gs, Gq/11		Adenylate cyclase stimulation, Phospholipase C stimulation		20504688|2461321|12065752|1370820|8903968		05:00:00	Gs		Gq/11		1	0	1	0	G	-	G	-	2	1
NK2R	P21452	NK2	361	TACR2	NK2R;NKNAR;TAC2R	A (Rhodopsin)	Peptide receptors	Tachykinin receptors	Gs, Gq/11		Adenylate cyclase stimulation, Phospholipase C stimulation		11459843|9826060|8903968		03:00:00	Gs		Gq/11		1	0	1	0	G	-	G	-	2	1
NK3R	P29371	NK3	362	TACR3	NK3R;TAC3R	A (Rhodopsin)	Peptide receptors	Tachykinin receptors	Gq/11		Phospholipase C stimulation		8903968		01:00:00			Gq/11		0	0	1	0	-	-	G	-	3	1
CXCR2	P25025	CXCR2	69	CXCR2	IL8RB	A (Rhodopsin)	Protein receptors	Chemokine receptors	Gi/o		Adenylate cyclase inhibition, Calcium channel	Calcium channel, Other - See Comments	9405640|10188995|12627953	8692878	03:00:00		Gi/o			0	1	0	0	-	G	-	-	3	1
TRFR	P34981	TRH1	363	TRHR		A (Rhodopsin)	Peptide receptors	Thyrotropin-releasing hormone receptors	Gq/11		Phospholipase C stimulation		1334076|1333052		02:00:00			Gq/11		0	0	1	0	-	-	G	-	3	1
UR2R	Q9UKP6	UT	365	UTS2R	GPR14	A (Rhodopsin)	Peptide receptors	Urotensin receptors	Gq/11		Phospholipase C stimulation		12381671|11020490|12842917|11435331|12503613		05:00:00			Gq/11		0	0	1	0	-	-	G	-	3	1
V1AR	P37288	V1A	366	AVPR1A	AVPR1	A (Rhodopsin)	Peptide receptors	Vasopressin and oxytocin receptors	Gq/11		Phospholipase C stimulation		10026824		01:00:00			Gq/11		0	0	1	0	-	-	G	-	3	1
V1BR	P47901	V1B	367	AVPR1B	AVPR3;VPR3	A (Rhodopsin)	Peptide receptors	Vasopressin and oxytocin receptors	Gq/11		Phospholipase C stimulation		10026824		01:00:00			Gq/11		0	0	1	0	-	-	G	-	3	1
V2R	P30518	V2	368	AVPR2	ADHR;DIR;DIR3;V2R	A (Rhodopsin)	Peptide receptors	Vasopressin and oxytocin receptors	Gs		Adenylate cyclase stimulation		10026824		01:00:00	Gs				1	0	0	0	G	-	-	-	3	1
OXYR	P30559	OT	369	OXTR		A (Rhodopsin)	Peptide receptors	Vasopressin and oxytocin receptors	Gq/11	Gi/o	Phospholipase C stimulation	Adenylate cyclase inhibition	9575824|10795906	9575824|9176188	02:00:00		Gi/o	Gq/11		0	2	1	0	-	G	G	-	2	1
CML1	Q99788	Chemerin	79	CMKLR1	CHEMR23;DEZ	A (Rhodopsin)	Protein receptors	Chemerin receptor	Gi/o		Adenylate cyclase inhibition		14530373		01:00:00		Gi/o			0	1	0	0	-	G	-	-	3	1
CCR1	P32246	CCR1	58	CCR1	CMKBR1;CMKR1;SCYAR1	A (Rhodopsin)	Protein receptors	Chemokine receptors	Gi/o	Gi/o	Calcium channel	Phospholipase C stimulation	16226254	11943214	01:00:00		Gi/o			0	1	0	0	-	G	-	-	3	1
CCR2	P41597	CCR2	59	CCR2	CMKBR2	A (Rhodopsin)	Protein receptors	Chemokine receptors	Gi/o				12920215		01:00:00		Gi/o			0	1	0	0	-	G	-	-	3	1
CCR3	P51677	CCR3	60	CCR3	CMKBR3	A (Rhodopsin)	Protein receptors	Chemokine receptors	Gi/o		Calcium channel						Gi/o			0	1	0	0	-	G	-	-	3	1
CCR4	P51679	CCR4	61	CCR4	CMKBR4	A (Rhodopsin)	Protein receptors	Chemokine receptors	Gi/o		Calcium channel		11880151		01:00:00		Gi/o			0	1	0	0	-	G	-	-	3	1
CCR5	P51681	CCR5	62	CCR5	CMKBR5	A (Rhodopsin)	Protein receptors	Chemokine receptors	Gi/o	Gi/o	Calcium channel	Adenylate cyclase inhibition	11880151	9303305	01:00:00		Gi/o			0	1	0	0	-	G	-	-	3	1
CCR6	P51684	CCR6	63	CCR6	CKRL3;CMKBR6;GPR29;STRL22	A (Rhodopsin)	Protein receptors	Chemokine receptors	Gi/o		Calcium channel		9893054		01:00:00		Gi/o			0	1	0	0	-	G	-	-	3	1
CCR7	P32248	CCR7	64	CCR7	CMKBR7;EBI1;EVI1	A (Rhodopsin)	Protein receptors	Chemokine receptors	Gi/o	Gi/o	Calcium channel	Other - See Comments	15059845|15778365|10512740	15054093	03:00:00		Gi/o			0	1	0	0	-	G	-	-	3	1
CCR8	P51685	CCR8	65	CCR8	CKRL1;CMKBR8;CMKBRL2	A (Rhodopsin)	Protein receptors	Chemokine receptors	Gi/o		Calcium channel		9207005		01:00:00		Gi/o			0	1	0	0	-	G	-	-	3	1
CCR9	P51686	CCR9	66	CCR9	GPR28	A (Rhodopsin)	Protein receptors	Chemokine receptors	Gi/o		Calcium channel		10229797|10544196|10498628		03:00:00		Gi/o			0	1	0	0	-	G	-	-	3	1
CCR10	P46092	CCR10	67	CCR10	GPR2	A (Rhodopsin)	Protein receptors	Chemokine receptors	Gi/o		Calcium channel						Gi/o			0	1	0	0	-	G	-	-	3	1
CXCR3	P49682	CXCR3	70	CXCR3	GPR9	A (Rhodopsin)	Protein receptors	Chemokine receptors	Gi/o		Calcium channel		9842912|10825390|12782716|15150261		04:00:00		Gi/o			0	1	0	0	-	G	-	-	3	1
CXCR4	P61073	CXCR4	71	CXCR4		A (Rhodopsin)	Protein receptors	Chemokine receptors	Gi/o		Calcium channel		9295051|11880151		02:00:00		Gi/o			0	1	0	0	-	G	-	-	3	1
CXCR5	P32302	CXCR5	72	CXCR5	BLR1;MDR15	A (Rhodopsin)	Protein receptors	Chemokine receptors	Gi/o	Gi/o	Calcium channel	Other - See Comments					Gi/o			0	1	0	0	-	G	-	-	3	1
CXCR6	O00574	CXCR6	73	CXCR6	BONZO;STRL33;TYMSTR	A (Rhodopsin)	Protein receptors	Chemokine receptors	Gi/o				11017100|14625285		02:00:00		Gi/o			0	1	0	0	-	G	-	-	3	1
CX3C1	P49238	CX3CR1	74	CX3CR1	CMKBRL1;GPR13	A (Rhodopsin)	Protein receptors	Chemokine receptors	Gi/o		Calcium channel		11880151		01:00:00		Gi/o			0	1	0	0	-	G	-	-	3	1
XCR1	P46094	XCR1	75	XCR1	CCXCR1;GPR5	A (Rhodopsin)	Protein receptors	Chemokine receptors	Gi/o		Calcium channel		9632725		01:00:00		Gi/o			0	1	0	0	-	G	-	-	3	1
FSHR	P23945	FSH	253	FSHR	LGR1	A (Rhodopsin)	Protein receptors	Glycoprotein hormone receptors	Gs, Gi/o, Gq/11		Adenylate cyclase stimulation		22666216		01:00:00	Gs	Gi/o	Gq/11		1	1	1	0	G	G	G	-	1	1
LSHR	P22888	LH	254	LHCGR	LCGR;LGR2;LHRHR	A (Rhodopsin)	Protein receptors	Glycoprotein hormone receptors	Gs	Gq/11	Adenylate cyclase stimulation	Phospholipase C stimulation	8702611|10493819	15919743|10493819	02:00:00	Gs		Gq/11		1	0	2	0	G	-	G	-	2	1
TSHR	P16473	TSH	255	TSHR	LGR3	A (Rhodopsin)	Protein receptors	Glycoprotein hormone receptors	Gs	Gq/11	Adenylate cyclase stimulation	Phospholipase C stimulation	8188646	8188646	01:00:00	Gs		Gq/11		1	0	2	0	G	-	G	-	2	1
PKR1	Q8TCW9	PKR1	335	PROKR1	GPR73;PKR1	A (Rhodopsin)	Protein receptors	Prokineticin receptors	Gq/11	Gs	Phospholipase C stimulation	Adenylate cyclase stimulation	12427552|11886876|16299550	15772293	03:00:00	Gs		Gq/11		2	0	1	0	G	-	G	-	2	1
PKR2	Q8NFJ6	PKR2	336	PROKR2	GPR73L1;PKR2	A (Rhodopsin)	Protein receptors	Prokineticin receptors	Gq/11	Gs, Gi/o	Phospholipase C stimulation	Adenylate cyclase stimulation, Other - See Comments	15772293|18826963	15772293|11751915	02:00:00	Gs	Gi/o	Gq/11		2	2	1	0	G	G	G	-	1	1
FFAR1	O14842	FFA1	225	FFAR1	GPR40	A (Rhodopsin)	Lipid receptors	Free fatty acid receptors	Gq/11	Gs, Gi/o	Adenylate cyclase inhibition, Phospholipase C stimulation	Adenylate cyclase stimulation, Phospholipase C stimulation, Phospholipase A2 stimulation	12496284|12565875|12629551	16254037|15695516	03:00:00	Gs	Gi/o	Gq/11		2	2	1	0	G	G	G	-	1	1
FFAR2	O15552	FFA2	226	FFAR2	FFA2;GPCR43;GPR43	A (Rhodopsin)	Lipid receptors	Free fatty acid receptors	Gq/11	Gi/o	Phospholipase C stimulation	Adenylate cyclase inhibition	12496283|12684041|12711604	12496283|12684041|12711604	03:00:00		Gi/o	Gq/11		0	2	1	0	-	G	G	-	2	1
FFAR3	O14843	FFA3	227	FFAR3	GPR41	A (Rhodopsin)	Lipid receptors	Free fatty acid receptors	Gi/o		Adenylate cyclase inhibition		14722361		01:00:00		Gi/o			0	1	0	0	-	G	-	-	3	1
FFAR4	Q5NUL3	FFA4	127	FFAR4	GPR120;GPR129;O3FAR1;PGR4	A (Rhodopsin)	Lipid receptors	Free fatty acid receptors	Gq/11				21618241|18827341|15774482		03:00:00			Gq/11		0	0	1	0	-	-	G	-	3	1
LT4R1	Q15722	BLT1	267	LTB4R	BLT;BLT1;BLTR;CMKRL1;GPR16;P2RY7	A (Rhodopsin)	Lipid receptors	Leukotriene receptors	Gi/o, Gq/11		Adenylate cyclase inhibition, Phospholipase C stimulation, Other - See Comments		12615958|9504401|9742207|10601267|15363951|9177352		06:00:00		Gi/o	Gq/11		0	1	1	0	-	G	G	-	2	1
LT4R2	Q9NPC1	BLT2	268	LTB4R2	BLT2R;BLTR2	A (Rhodopsin)	Lipid receptors	Leukotriene receptors	Gi/o	Gq/11	Adenylate cyclase inhibition	Phospholipase C stimulation	10889186|10913347|10934230	10889186|10913347|10934230	03:00:00		Gi/o	Gq/11		0	1	2	0	-	G	G	-	2	1
CLTR1	Q9Y271	CysLT1	269	CYSLTR1	CYSLT1	A (Rhodopsin)	Lipid receptors	Leukotriene receptors	Gq/11	Gi/o	Phospholipase C stimulation	Phospholipase C stimulation	10391245|10462554	14518564|1964390|2174431	02:00:00		Gi/o	Gq/11		0	2	1	0	-	G	G	-	2	1
CLTR2	Q9NS75	CysLT2	270	CYSLTR2	CYSLT2;CYSLT2R;PSEC0146	A (Rhodopsin)	Lipid receptors	Leukotriene receptors	Gq/11	Gi/o	Phospholipase C stimulation	Other - See Comments	21753081|10851239	13679572	02:00:00		Gi/o	Gq/11		0	2	1	0	-	G	G	-	2	1
OXER1	Q8TDS5	OXE	271	OXER1	GPR170;TG1019	A (Rhodopsin)	Lipid receptors	Leukotriene receptors	Gi/o	Gi/o	Phospholipase C stimulation	Adenylate cyclase inhibition, Phospholipase A2 stimulation, Other - See Comments	22634634|16039985	22634634|12065583|16039985|8663432	02:00:00		Gi/o			0	1	0	0	-	G	-	-	3	1
LPAR1	Q92633	LPA1	272	LPAR1	EDG2;LPA1	A (Rhodopsin)	Lipid receptors	Lysophospholipid (LPA) receptors	Gi/o, Gq/11, G12/13		Adenylate cyclase inhibition, Phospholipase C stimulation, Phospholipase A2 stimulation, Other - See Comments		9600933|11040035		02:00:00		Gi/o	Gq/11	G12/13	0	1	1	1	-	G	G	G	1	1
LPAR2	Q9HBW0	LPA2	273	LPAR2	EDG4;LPA2	A (Rhodopsin)	Lipid receptors	Lysophospholipid (LPA) receptors	Gi/o, Gq/11, G12/13	Gi/o, Gq/11, G12/13	Adenylate cyclase inhibition, Phospholipase A2 stimulation		11040035		01:00:00		Gi/o	Gq/11	G12/13	0	1	1	1	-	G	G	G	1	1
LPAR3	Q9UBY5	LPA3	274	LPAR3	EDG7;LPA3	A (Rhodopsin)	Lipid receptors	Lysophospholipid (LPA) receptors	Gi/o, Gq/11		Adenylate cyclase inhibition, Phospholipase A2 stimulation		11040035		01:00:00		Gi/o	Gq/11		0	1	1	0	-	G	G	-	2	1
LPAR4	Q99677	LPA4	94	LPAR4	GPR23;LPA4;P2RY9	A (Rhodopsin)	Lipid receptors	Lysophospholipid (LPA) receptors	Gs, Gi/o, Gq/11, G12/13		Adenylate cyclase stimulation		12724320		01:00:00	Gs	Gi/o	Gq/11	G12/13	1	1	1	1	G	G	G	G	0	1
LPAR5	Q9H1C0	LPA5	124	LPAR5	GPR92;GPR93	A (Rhodopsin)	Lipid receptors	Lysophospholipid (LPA) receptors	Gq/11, G12/13		Other - See Comments		16774927		01:00:00			Gq/11	G12/13	0	0	1	1	-	-	G	G	2	1
LPAR6	P43657	LPA6	163	LPAR6	P2RY5	A (Rhodopsin)	Lipid receptors	Lysophospholipid (LPA) receptors	Gs, Gi/o, G12/13		Adenylate cyclase stimulation, Phospholipase C stimulation, Other - See Comments		19679818|18297070|19386608		03:00:00	Gs	Gi/o		G12/13	1	1	0	1	G	G	-	G	1	1
S1PR1	P21453	S1P1	275	S1PR1	CHEDG1;EDG1	A (Rhodopsin)	Lipid receptors	Lysophospholipid (S1P) receptors	Gi/o		Adenylate cyclase inhibition, Phospholipase C stimulation, Calcium channel, Phospholipase D stimulation, Other - See Comments		16554657|10446161|9765227		03:00:00		Gi/o			0	1	0	0	-	G	-	-	3	1
S1PR2	O95136	S1P2	276	S1PR2	EDG5	A (Rhodopsin)	Lipid receptors	Lysophospholipid (S1P) receptors	Gs, Gq/11, G12/13		Adenylate cyclase stimulation, Phospholipase C stimulation, Calcium channel		9854026|17283075		02:00:00	Gs		Gq/11	G12/13	1	0	1	1	G	-	G	G	1	1
S1PR3	Q99500	S1P3	277	S1PR3	EDG3	A (Rhodopsin)	Lipid receptors	Lysophospholipid (S1P) receptors	Gi/o, Gq/11, G12/13		Adenylate cyclase inhibition, Phospholipase C stimulation		10383399|10488065		02:00:00		Gi/o	Gq/11	G12/13	0	1	1	1	-	G	G	G	1	1
S1PR4	O95977	S1P4	278	S1PR4	EDG6	A (Rhodopsin)	Lipid receptors	Lysophospholipid (S1P) receptors	Gi/o, G12/13		Adenylate cyclase inhibition		12761884|12875654		02:00:00		Gi/o		G12/13	0	1	0	1	-	G	-	G	2	1
S1PR5	Q9H228	S1P5	279	S1PR5	EDG8	A (Rhodopsin)	Lipid receptors	Lysophospholipid (S1P) receptors	Gi/o, G12/13		Adenylate cyclase inhibition		10799507|11069896		02:00:00		Gi/o		G12/13	0	1	0	1	-	G	-	G	2	1
CNR1	P21554	CB1	56	CNR1	CNR	A (Rhodopsin)	Lipid receptors	Cannabinoid receptors	Gi/o	Gs	Adenylate cyclase inhibition, Potassium channel, Calcium channel, Other - See Comments	Adenylate cyclase stimulation	1902257|2869405|1315042|8781498|10362691|7472417|9242259|7777206|8954083|7775459|7556170	9751186|9204917	11:00:00	Gs	Gi/o			2	1	0	0	G	G	-	-	2	1
CNR2	P34972	CB2	57	CNR2	CB2A;CB2B	A (Rhodopsin)	Lipid receptors	Cannabinoid receptors	Gi/o	Gs	Adenylate cyclase inhibition, Other - See Comments	Adenylate cyclase stimulation	7565624|7651369|8819477|8647116|8679694|12037135|12084572	9751186|12037135	07:00:00	Gs	Gi/o			2	1	0	0	G	G	-	-	2	1
GPR18	Q14330	GPR18	89	GPR18	GPCRW	A (Rhodopsin)	Lipid receptors	GPR18, GPR55 and GPR119	Gi/o, Gq/11				16844083|22266325		02:00:00		Gi/o	Gq/11		0	1	1	0	-	G	G	-	2	1
GPR55	Q9Y2T6	GPR55	109	GPR55		A (Rhodopsin)	Lipid receptors	GPR18, GPR55 and GPR119	Gq/11, G12/13		Phospholipase C stimulation, Other - See Comments	Phospholipase C stimulation	17876302	21718301|18445684	01:00:00			Gq/11	G12/13	0	0	1	1	-	-	G	G	2	1
GP119	Q8TDV5	GPR119	126	GPR119		A (Rhodopsin)	Lipid receptors	GPR18, GPR55 and GPR119	Gs		Adenylate cyclase stimulation		15607732		01:00:00	Gs				1	0	0	0	G	-	-	-	3	1
PTAFR	P25105	PAF	334	PTAFR	PAFR	A (Rhodopsin)	Lipid receptors	Platelet-activating factor receptors	Gi/o, Gq/11, G protein independent mechanism		Adenylate cyclase stimulation, Other - See Comments		16920964|14617636|11309383|14500680|22570732		05:00:00		Gi/o	Gq/11		0	1	1	0	-	G	G	-	2	1
PD2R	Q13258	DP1	338	PTGDR		A (Rhodopsin)	Lipid receptors	Prostanoid receptors	Gs		Adenylate cyclase stimulation		12649388		01:00:00	Gs				1	0	0	0	G	-	-	-	3	1
PD2R2	Q9Y5Y4	DP2	339	PTGDR2	CRTH2;DL1R;GPR44	A (Rhodopsin)	Lipid receptors	Prostanoid receptors	Gi/o		Adenylate cyclase inhibition		12466225|12721327		02:00:00		Gi/o			0	1	0	0	-	G	-	-	3	1
PE2R1	P34995	EP1	340	PTGER1		A (Rhodopsin)	Lipid receptors	Prostanoid receptors	Gq/11	Gi/o	Other - See Comments	Adenylate cyclase inhibition	7766667	7532011	01:00:00		Gi/o	Gq/11		0	2	1	0	-	G	G	-	2	1
PE2R2	P43116	EP2	341	PTGER2		A (Rhodopsin)	Lipid receptors	Prostanoid receptors	Gs		Adenylate cyclase stimulation		7532011|14607240		02:00:00	Gs				1	0	0	0	G	-	-	-	3	1
PE2R3	P43115	EP3	342	PTGER3		A (Rhodopsin)	Lipid receptors	Prostanoid receptors	Gi/o	Gq/11	Adenylate cyclase inhibition	Phospholipase C stimulation	7981210|7532011|10082673|9013884	7981210|19769944	04:00:00		Gi/o	Gq/11		0	1	2	0	-	G	G	-	2	1
P2Y14	Q15391	P2Y14	330	P2RY14	GPR105;KIAA0001	A (Rhodopsin)	Nucleotide receptors	P2Y receptors	Gi/o	Gi/o	Adenylate cyclase inhibition	Phospholipase C stimulation	15997228	14559350|15850653	01:00:00		Gi/o			0	1	0	0	-	G	-	-	3	1
PE2R4	P35408	EP4	343	PTGER4	PTGER2	A (Rhodopsin)	Lipid receptors	Prostanoid receptors	Gs	Gi/o	Adenylate cyclase stimulation	Other - See Comments	9013884	12566441|15855407|22002714|22012553	01:00:00	Gs	Gi/o			1	2	0	0	G	G	-	-	2	1
PF2R	P43088	FP	344	PTGFR		A (Rhodopsin)	Lipid receptors	Prostanoid receptors	Gq/11	Gs	Phospholipase C stimulation		9462300|8179609		02:00:00	Gs		Gq/11		2	0	1	0	G	-	G	-	2	1
PI2R	P43119	IP	345	PTGIR	PRIPR	A (Rhodopsin)	Lipid receptors	Prostanoid receptors	Gs	Gi/o, Gq/11	Adenylate cyclase stimulation	Adenylate cyclase inhibition, Phospholipase C stimulation	7511597|7532011	12016224|7532011	02:00:00	Gs	Gi/o	Gq/11		1	2	2	0	G	G	G	-	1	1
TA2R	P21731	TP	346	TBXA2R		A (Rhodopsin)	Lipid receptors	Prostanoid receptors	Gq/11		Phospholipase C stimulation		9152406		01:00:00			Gq/11		0	0	1	0	-	-	G	-	3	1
MTR1A	P48039	MT1	287	MTNR1A		A (Rhodopsin)	Melatonin receptors	Melatonin	Gi/o	Gq/11	Adenylate cyclase inhibition	Phospholipase C stimulation, Potassium channel, Calcium channel	7946354|15695169|11698691|12957828|11992626	10531408|11698691|12957828|11992626	05:00:00		Gi/o	Gq/11		0	1	2	0	-	G	G	-	2	1
MTR1B	P49286	MT2	288	MTNR1B		A (Rhodopsin)	Melatonin receptors	Melatonin	Gi/o		Adenylate cyclase inhibition, Phospholipase C stimulation	Other - See Comments	7568007|11698691|12957828|11992626|11121382	10413300	05:00:00		Gi/o			0	1	0	0	-	G	-	-	3	1
AA1R	P30542	A1	18	ADORA1		A (Rhodopsin)	Nucleotide receptors	Adenosine receptors	Gi/o	Gs, Gq/11	Adenylate cyclase inhibition	Adenylate cyclase stimulation, Phospholipase C stimulation	7798201|15302686	15302686	02:00:00	Gs	Gi/o	Gq/11		2	1	2	0	G	G	G	-	1	1
AA2AR	P29274	A2A	19	ADORA2A	ADORA2	A (Rhodopsin)	Nucleotide receptors	Adenosine receptors	Gs	Gq/11	Adenylate cyclase stimulation	Adenylate cyclase stimulation, Phospholipase C stimulation	8995267	15306230	01:00:00	Gs		Gq/11		1	0	2	0	G	-	G	-	2	1
AA2BR	P29275	A2B	20	ADORA2B		A (Rhodopsin)	Nucleotide receptors	Adenosine receptors	Gs	Gq/11	Adenylate cyclase stimulation	Phospholipase C stimulation	10496952|7560091	10496952|7560091	02:00:00	Gs		Gq/11		1	0	2	0	G	-	G	-	2	1
AA3R	P0DMS8	A3	21	ADORA3		A (Rhodopsin)	Nucleotide receptors	Adenosine receptors	Gi/o	Gi/o	Adenylate cyclase inhibition	Phospholipase C stimulation	1323836|7622506	10496952|12817016	02:00:00		Gi/o			0	1	0	0	-	G	-	-	3	1
P2RY1	P47900	P2Y1	323	P2RY1		A (Rhodopsin)	Nucleotide receptors	P2Y receptors	Gq/11	Gi/o	Phospholipase C stimulation	Potassium channel	15509659|14742685	16957090|18689674	02:00:00		Gi/o	Gq/11		0	2	1	0	-	G	G	-	2	1
P2RY2	P41231	P2Y2	324	P2RY2	P2RU1	A (Rhodopsin)	Nucleotide receptors	P2Y receptors	Gq/11	Gi/o, G12/13	Phospholipase C stimulation	Other - See Comments	17609252|17291397	16186116|17452627	02:00:00		Gi/o	Gq/11	G12/13	0	2	1	2	-	G	G	G	1	1
P2RY4	P51582	P2Y4	325	P2RY4	NRU	A (Rhodopsin)	Nucleotide receptors	P2Y receptors	Gq/11		Phospholipase C stimulation	Phospholipase A2 stimulation		16839719				Gq/11		0	0	1	0	-	-	G	-	3	1
P2RY6	Q15077	P2Y6	326	P2RY6	PP2891	A (Rhodopsin)	Nucleotide receptors	P2Y receptors	Gq/11	G12/13	Phospholipase C stimulation	Other - See Comments		19008857|19011163				Gq/11	G12/13	0	0	1	2	-	-	G	G	2	1
P2Y11	Q96G91	P2Y11	327	P2RY11		A (Rhodopsin)	Nucleotide receptors	P2Y receptors	Gq/11	Gs	Phospholipase C stimulation	Adenylate cyclase stimulation	11156592	11156592|10578132	01:00:00	Gs		Gq/11		2	0	1	0	G	-	G	-	2	1
P2Y13	Q9BPV8	P2Y13	329	P2RY13	GPR86;GPR94;FKSG77	A (Rhodopsin)	Nucleotide receptors	P2Y receptors	Gi/o		Adenylate cyclase inhibition	Other - See Comments	11546776		01:00:00		Gi/o			0	1	0	0	-	G	-	-	3	1
GPBAR	Q8TDU6	GPBA	37	GPBAR1	TGR5	A (Rhodopsin)	Steroid receptors	Bile acid receptors	Gs		Adenylate cyclase stimulation		12524422		01:00:00	Gs				1	0	0	0	G	-	-	-	3	1
GPER1	Q99527	GPER	221	GPER1	CEPR;CMKRL2;DRY12;GPER;GPR30	A (Rhodopsin)	Steroid receptors	Estrogen (G protein-coupled) receptors	Gi/o	Gs	Phospholipase C stimulation	Adenylate cyclase stimulation	15705806|11043579|15090535	15539556|11773440	03:00:00	Gs	Gi/o			2	1	0	0	G	G	-	-	2	1
HCAR1	Q9BXC0	HCA1	311	HCAR1	GPR104;GPR81;HCA1;FKSG80	A (Rhodopsin)	Alicarboxylic acid receptors	Hydroxycarboxylic acid receptors	Gi/o								Gi/o			0	1	0	0	-	G	-	-	3	1
HCAR2	Q8TDS4	HCA2	312	HCAR2	GPR109A;HCA2;HM74A;NIACR1	A (Rhodopsin)	Alicarboxylic acid receptors	Hydroxycarboxylic acid receptors	Gi/o		Adenylate cyclase inhibition, Phospholipase A2 stimulation		17452318|16674924|12563315|12522134		04:00:00		Gi/o			0	1	0	0	-	G	-	-	3	1
HCAR3	P49019	HCA3	313	HCAR3	GPR109B;HCA3;HM74B;NIACR2	A (Rhodopsin)	Alicarboxylic acid receptors	Hydroxycarboxylic acid receptors	Gi/o		Adenylate cyclase inhibition, Other - See Comments		17358052|16389067|15929991|12522134		04:00:00		Gi/o			0	1	0	0	-	G	-	-	3	1
OXGR1	Q96P68	Oxoglutarate	162	OXGR1	GPR80;GPR99;P2RY15;P2Y15	A (Rhodopsin)	Alicarboxylic acid receptors	Oxoglutarate receptors	Gq/11		Phospholipase C stimulation		15141213		01:00:00			Gq/11		0	0	1	0	-	-	G	-	3	1
SUCR1	Q9BXA5	Succinate	166	SUCNR1	GPR91	A (Rhodopsin)	Alicarboxylic acid receptors	Succinate receptors	Gi/o	Gq/11	Adenylate cyclase inhibition, Phospholipase C stimulation, Other - See Comments	Phospholipase C stimulation	26386312|15141213|23770096	15141213	03:00:00		Gi/o	Gq/11		0	1	2	0	-	G	G	-	2	1
OPN4	Q9UHM6	OPN4	2758	OPN4	MOP	A (Rhodopsin)	Sensory receptors	Opsins	Gi/o, Gq/11		Adenylate cyclase inhibition, Phospholipase C stimulation		23554393		01:00:00		Gi/o	Gq/11		0	1	1	0	-	G	G	-	2	1
OPN5	Q6U736	OPN5	161	OPN5	GPR136;PGR12;TMEM13	A (Rhodopsin)	Sensory receptors	Opsins	Gi/o				22043319		01:00:00		Gi/o			0	1	0	0	-	G	-	-	3	1
GPR3	P46089	GPR3	83	GPR3	ACCA	A (Rhodopsin)	Orphan receptors	Class A orphans	Gs		Adenylate cyclase stimulation		7639700		01:00:00	Gs				1	0	0	0	G	-	-	-	3	1
GPR4	P46093	GPR4	84	GPR4	GPR19	A (Rhodopsin)	Orphan receptors	Class A orphans	Gs, Gi/o, Gq/11, G12/13		Adenylate cyclase stimulation, Phospholipase C stimulation		15221007		01:00:00	Gs	Gi/o	Gq/11	G12/13	1	1	1	1	G	G	G	G	0	1
GPR6	P46095	GPR6	85	GPR6		A (Rhodopsin)	Orphan receptors	Class A orphans	Gs, Gi/o		Adenylate cyclase stimulation, Adenylate cyclase inhibition		12574419|19059244		02:00:00	Gs	Gi/o			1	1	0	0	G	G	-	-	2	1
GPR12	P47775	GPR12	86	GPR12		A (Rhodopsin)	Orphan receptors	Class A orphans	Gs, Gi/o		Adenylate cyclase stimulation, Adenylate cyclase inhibition		12574419|17078925|17284443|12220620		04:00:00	Gs	Gi/o			1	1	0	0	G	G	-	-	2	1
GPR17	Q13304	GPR17	88	GPR17		A (Rhodopsin)	Orphan receptors	Class A orphans	Gi/o	Gq/11	Adenylate cyclase inhibition	Phospholipase C stimulation	21773766|16990797|19625605	16990797|19625605	03:00:00		Gi/o	Gq/11		0	1	2	0	-	G	G	-	2	1
GPR20	Q99678	GPR20	91	GPR20		A (Rhodopsin)	Orphan receptors	Class A orphans	Gi/o		Adenylate cyclase inhibition		18347022		01:00:00		Gi/o			0	1	0	0	-	G	-	-	3	1
GPR22	Q99680	GPR22	93	GPR22		A (Rhodopsin)	Orphan receptors	Class A orphans	Gi/o		Adenylate cyclase inhibition		18539757		01:00:00		Gi/o			0	1	0	0	-	G	-	-	3	1
GPR26	Q8NDV2	GPR26	96	GPR26		A (Rhodopsin)	Orphan receptors	Class A orphans	Gs		Adenylate cyclase stimulation		17363172		01:00:00	Gs				1	0	0	0	G	-	-	-	3	1
GPR27	Q9NS67	GPR27	97	GPR27	SREB1	A (Rhodopsin)	Orphan receptors	Class A orphans	Gq/11		Phospholipase C stimulation							Gq/11		0	0	1	0	-	-	G	-	3	1
GPR31	O00270	GPR31	98	GPR31		A (Rhodopsin)	Orphan receptors	Class A orphans	Gi/o				21712392		01:00:00		Gi/o			0	1	0	0	-	G	-	-	3	1
GPR33	Q49SQ1	GPR33	100	GPR33		A (Rhodopsin)	Orphan receptors	Class A orphans	Gi/o		Adenylate cyclase inhibition		16720677|15987686|16595170		03:00:00		Gi/o			0	1	0	0	-	G	-	-	3	1
GPR34	Q9UPC5	GPR34	101	GPR34		A (Rhodopsin)	Orphan receptors	Class A orphans	Gi/o		Phospholipase A2 stimulation		22343749|17628210		02:00:00		Gi/o			0	1	0	0	-	G	-	-	3	1
GPR37	O15354	GPR37	103	GPR37		A (Rhodopsin)	Orphan receptors	Class A orphans	Gi/o		Adenylate cyclase inhibition		16443751		01:00:00		Gi/o			0	1	0	0	-	G	-	-	3	1
G37L1	O60883	GPR37L1	104	GPR37L1	ETBRLP2	A (Rhodopsin)	Orphan receptors	Class A orphans	Gi/o		Adenylate cyclase inhibition						Gi/o			0	1	0	0	-	G	-	-	3	1
GPR39	O43194	GPR39	105	GPR39		A (Rhodopsin)	Orphan receptors	Class A orphans	Gq/11	Gs, G12/13	Phospholipase C stimulation	Adenylate cyclase stimulation	15383539	15383539	01:00:00	Gs		Gq/11	G12/13	2	0	1	2	G	-	G	G	1	1
PSYR	Q8IYL9	GPR65	113	GPR65	TDAG8	A (Rhodopsin)	Orphan receptors	Class A orphans	Gs		Adenylate cyclase stimulation		15618224|19234222|15665078|15326175		04:00:00	Gs				1	0	0	0	G	-	-	-	3	1
OGR1	Q15743	GPR68	114	GPR68	OGR1	A (Rhodopsin)	Orphan receptors	Class A orphans	Gi/o, Gq/11		Adenylate cyclase inhibition, Phospholipase C stimulation		20622109|21907704|12069813|16787916		04:00:00		Gi/o	Gq/11		0	1	1	0	-	G	G	-	2	1
GPR75	O95800	GPR75	115	GPR75		A (Rhodopsin)	Orphan receptors	Class A orphans	Gq/11		Phospholipase C stimulation		17001303		01:00:00			Gq/11		0	0	1	0	-	-	G	-	3	1
GPR78	Q96P69	GPR78	116	GPR78	UNQ5925/PRO19818	A (Rhodopsin)	Orphan receptors	Class A orphans	Gs		Adenylate cyclase stimulation		17363172		01:00:00	Gs				1	0	0	0	G	-	-	-	3	1
GPR84	Q9NQS5	GPR84	120	GPR84	EX33	A (Rhodopsin)	Orphan receptors	Class A orphans	Gi/o				16966319		01:00:00		Gi/o			0	1	0	0	-	G	-	-	3	1
GP101	Q96P66	GPR101	125	GPR101		A (Rhodopsin)	Orphan receptors	Class A orphans	Gs		Adenylate cyclase stimulation		16647048		01:00:00	Gs				1	0	0	0	G	-	-	-	3	1
GP139	Q6DWJ6	GPR139	130	GPR139	GPRG1;PGR3	A (Rhodopsin)	Orphan receptors	Class A orphans	Gq/11		Other - See Comments		15845401		01:00:00			Gq/11		0	0	1	0	-	-	G	-	3	1
GP183	P32249	GPR183	81	GPR183	EBI2	A (Rhodopsin)	Orphan receptors	Class A orphans	Gi/o		Adenylate cyclase inhibition		21796212|21844396|21796211|16540462		04:00:00		Gi/o			0	1	0	0	-	G	-	-	3	1
MAS	P04201	MAS1	150	MAS1	MAS	A (Rhodopsin)	Orphan receptors	Class A orphans	Gi/o, Gq/11		Phospholipase C stimulation, Other - See Comments		22003054		01:00:00		Gi/o	Gq/11		0	1	1	0	-	G	G	-	2	1
MRGRD	Q8TDS7	MRGPRD	152	MRGPRD	MRGD	A (Rhodopsin)	Orphan receptors	Class A orphans	Gi/o, Gq/11		Adenylate cyclase inhibition, Phospholipase C stimulation		17442834|15037631		02:00:00		Gi/o	Gq/11		0	1	1	0	-	G	G	-	2	1
MRGX1	Q96LB2	MRGPRX1	156	MRGPRX1	MRGX1;SNSR3;SNSR4	A (Rhodopsin)	Orphan receptors	Class A orphans	Gq/11		Phospholipase C stimulation		12397184		01:00:00			Gq/11		0	0	1	0	-	-	G	-	3	1
MRGX2	Q96LB1	MRGPRX2	157	MRGPRX2	MRGX2	A (Rhodopsin)	Orphan receptors	Class A orphans	Gi/o, Gq/11		Adenylate cyclase inhibition, Phospholipase C stimulation		15823563|12915402|16979137		03:00:00		Gi/o	Gq/11		0	1	1	0	-	G	G	-	2	1
MRGX3	Q96LB0	MRGPRX3	158	MRGPRX3	MRGX3;SNSR1;SNSR2	A (Rhodopsin)	Orphan receptors	Class A orphans	Gq/11		Phospholipase C stimulation		16284629		01:00:00			Gq/11		0	0	1	0	-	-	G	-	3	1
MRGX4	Q96LA9	MRGPRX4	159	MRGPRX4	MRGX4;SNSR5;SNSR6	A (Rhodopsin)	Orphan receptors	Class A orphans	Gq/11		Phospholipase C stimulation		16284629		01:00:00			Gq/11		0	0	1	0	-	-	G	-	3	1
CALCR	P30988-2	CT	43	CALCR		B1 (Secretin)	Peptide receptors	Calcitonin receptors	Gs	Gq/11	Adenylate cyclase stimulation	Phospholipase C stimulation	15692146|14623894|25815174	11459804|8732687|25815174|1646739	03:00:00	Gs		Gq/11		1	0	2	0	G	-	G	-	2	1
CRFR1	P34998-2	CRF1	212	CRHR1	CRFR;CRFR1;CRHR	B1 (Secretin)	Peptide receptors	Corticotropin-releasing factor receptors	Gs	Gq/11	Adenylate cyclase stimulation	Phospholipase C stimulation	7692441|8274282|8243338|8243652|8536612|9326293|9863624|9851694|11145609|11711031|14761672	8536612|15450949	11:00:00	Gs		Gq/11		1	0	2	0	G	-	G	-	2	1
CRFR2	Q13324	CRF2	213	CRHR2	CRF2R;CRH2R	B1 (Secretin)	Peptide receptors	Corticotropin-releasing factor receptors	Gs	Gq/11	Adenylate cyclase stimulation	Phospholipase C stimulation	9326293|7846062|7755719|11416224|7565810|8536644|9199241|9717834|10336722	15450949	09:00:00	Gs		Gq/11		1	0	2	0	G	-	G	-	2	1
GHRHR	Q02643	GHRH	247	GHRHR		B1 (Secretin)	Peptide receptors	Glucagon receptor family	Gs		Adenylate cyclase stimulation, Calcium channel		11867632		01:00:00	Gs				1	0	0	0	G	-	-	-	3	1
GIPR	P48546	GIP	248	GIPR		B1 (Secretin)	Peptide receptors	Glucagon receptor family	Gs		Adenylate cyclase stimulation	Phospholipase A2 stimulation		11323439		Gs				1	0	0	0	G	-	-	-	3	1
GLP1R	P43220	GLP-1	249	GLP1R		B1 (Secretin)	Peptide receptors	Glucagon receptor family	Gs		Adenylate cyclase stimulation		10909973		01:00:00	Gs				1	0	0	0	G	-	-	-	3	1
GLP2R	O95838	GLP-2	250	GLP2R		B1 (Secretin)	Peptide receptors	Glucagon receptor family	Gs		Adenylate cyclase stimulation				01:00:00	Gs				1	0	0	0	G	-	-	-	3	1
GLR	P47871	Glucagon	251	GCGR		B1 (Secretin)	Peptide receptors	Glucagon receptor family	Gs		Adenylate cyclase stimulation		6309844		01:00:00	Gs				1	0	0	0	G	-	-	-	3	1
SCTR	P47872	Secretin	252	SCTR		B1 (Secretin)	Peptide receptors	Glucagon receptor family	Gs		Adenylate cyclase stimulation				01:00:00	Gs				1	0	0	0	G	-	-	-	3	1
PTH1R	Q03431	PTH1	331	PTH1R	PTHR;PTHR1	B1 (Secretin)	Peptide receptors	Parathyroid hormone receptors	Gs	Gq/11	Adenylate cyclase stimulation	Phospholipase C stimulation	8732687|8082781|9704578|17040990	8732687|9054374|9704578|10856878	04:00:00	Gs		Gq/11		1	0	2	0	G	-	G	-	2	1
PACR	P41586	PAC1	370	ADCYAP1R1		B1 (Secretin)	Peptide receptors	VIP and PACAP receptors	Gs, Gq/11	G protein (identity unknown)	Adenylate cyclase stimulation	Phospholipase C stimulation	7796937|8663363	7796937	02:00:00	Gs		Gq/11		1	0	1	0	G	-	G	-	2	1
VIPR1	P32241	VPAC1	371	VIPR1		B1 (Secretin)	Peptide receptors	VIP and PACAP receptors	Gs	Gi/o, Gq/11, G protein (identity unknown)	Adenylate cyclase stimulation	Phospholipase C stimulation, Phospholipase D stimulation	8390245|8074647|208077|8791009	8993443|9223629|11353814	04:00:00	Gs	Gi/o	Gq/11		1	2	2	0	G	G	G	-	1	1
VIPR2	P41587	VPAC2	372	VIPR2	VIP2R	B1 (Secretin)	Peptide receptors	VIP and PACAP receptors	Gs	G protein (identity unknown)	Adenylate cyclase stimulation	Phospholipase C stimulation, Phospholipase D stimulation		8993443|11181537|11353814		Gs				1	0	0	0	G	-	-	-	3	1
AGRL1	O94910	ADGRL1	206	ADGRL1	KIAA0821;	B2 (Adhesion)	Adhesion receptors	ADGRL	Gq/11	G protein (identity unknown)	Phospholipase C stimulation, Potassium channel, Calcium channel	Adenylate cyclase stimulation	9799228|16301314|9261169|10212487|19124473|21724987|15483624	9261169	07:00:00			Gq/11		0	0	1	0	-	-	G	-	3	1
AGRE2	Q9UHX3	ADGRE2	183	ADGRE2	EMR2	B2 (Adhesion)	Adhesion receptors	ADGRE	Gq/11				22575658		01:00:00			Gq/11		0	0	1	0	-	-	G	-	3	1
AGRE5	P48960	ADGRE5	177	CD97		B2 (Adhesion)	Adhesion receptors	ADGRE	G12/13				22797060|21978933		02:00:00				G12/13	0	0	0	1	-	-	-	G	3	1
AGRD1	Q6QNK2	ADGRD1	202	ADGRD1	GPR133;PGR25	B2 (Adhesion)	Adhesion receptors	ADGRD	Gs	Gs	Adenylate cyclase stimulation	Adenylate cyclase stimulation	22025619	22025619	01:00:00	Gs				1	0	0	0	G	-	-	-	3	1
AGRG1	Q9Y653	ADGRG1	186	ADGRG1	GPR56;TM7LN4;TM7XN1;UNQ540/PRO1083	B2 (Adhesion)	Adhesion receptors	ADGRG	Gq/11, G12/13		Other - See Comments	Other - See Comments	21768377|23001883	23001883	02:00:00			Gq/11	G12/13	0	0	1	1	-	-	G	G	2	1
AGRG2	Q8IZP9	ADGRG2	187	ADGRG2	GPR64;HE6;TM7LN2	B2 (Adhesion)	Adhesion receptors	ADGRG		Gq/11	Adenylate cyclase stimulation	Phospholipase C stimulation	16442214		01:00:00			Gq/11		0	0	2	0	-	-	G	-	3	1
AGRG3	Q86Y34	ADGRG3	188	ADGRG3	GPR97;PGR26	B2 (Adhesion)	Adhesion receptors	ADGRG	Gi/o				22575658		01:00:00		Gi/o			0	1	0	0	-	G	-	-	3	1
CASR	P41180	CaS	54	CASR	GPRC2A;PCAR1	C (Glutamate)	Ion receptors	Calcium-sensing receptors	Gi/o, Gq/11, G12/13	Gq/11, G protein (identity unknown)	Adenylate cyclase inhibition, Phospholipase C stimulation, Phospholipase D stimulation	Adenylate cyclase stimulation, Potassium channel, Phospholipase A2 stimulation, Phospholipase D stimulation, Other - See Comments	9556057|3755106|9144337|2462488|12954603	11278341|10217268|9614133|9144337|11208605|9422777|11038250|8806675	05:00:00		Gi/o	Gq/11	G12/13	0	1	1	1	-	G	G	G	1	1
GRM1	Q13255	mGlu1	289	GRM1	GPRC1A;MGLUR1	C (Glutamate)	Amino acid receptors	Metabotropic glutamate receptors	Gq/11	Gs, Gi/o, G protein independent mechanism	Phospholipase C stimulation	Adenylate cyclase stimulation, Adenylate cyclase inhibition, Phospholipase A2 stimulation, Phospholipase D stimulation, Other - See Comments	9974152|9131252|19112153|7623957	9974152|9131252|19112153|7623957	04:00:00	Gs	Gi/o	Gq/11		2	2	1	0	G	G	G	-	1	1
GRM2	Q14416	mGlu2	290	GRM2	GPRC1B;MGLUR2	C (Glutamate)	Amino acid receptors	Metabotropic glutamate receptors	Gi/o		Adenylate cyclase inhibition, Potassium channel		7620613|10221750		02:00:00		Gi/o			0	1	0	0	-	G	-	-	3	1
GRM3	Q14832	mGlu3	291	GRM3	GPRC1C;MGLUR3	C (Glutamate)	Amino acid receptors	Metabotropic glutamate receptors	Gi/o		Adenylate cyclase inhibition, Potassium channel, Calcium channel		11168538		01:00:00		Gi/o			0	1	0	0	-	G	-	-	3	1
GRM4	Q14833	mGlu4	292	GRM4	GPRC1D;MGLUR4	C (Glutamate)	Amino acid receptors	Metabotropic glutamate receptors	Gi/o		Adenylate cyclase inhibition		7623957|10530808		02:00:00		Gi/o			0	1	0	0	-	G	-	-	3	1
GRM5	P41594	mGlu5	293	GRM5	GPRC1E;MGLUR5	C (Glutamate)	Amino acid receptors	Metabotropic glutamate receptors	Gq/11	Gs, Gi/o	Phospholipase C stimulation	Adenylate cyclase stimulation, Potassium channel, Calcium channel, Phospholipase A2 stimulation, Phospholipase D stimulation, Other - See Comments	7623957|9131252	9974152|9131252|7623957	02:00:00	Gs	Gi/o	Gq/11		2	2	1	0	G	G	G	-	1	1
GRM6	O15303	mGlu6	294	GRM6	GPRC1F;MGLUR6	C (Glutamate)	Amino acid receptors	Metabotropic glutamate receptors	Gi/o	Gi/o	Other - See Comments	Adenylate cyclase inhibition	9407094|11124982	8389366|9215706	02:00:00		Gi/o			0	1	0	0	-	G	-	-	3	1
GRM7	Q14831	mGlu7	295	GRM7	GPRC1G;MGLUR7	C (Glutamate)	Amino acid receptors	Metabotropic glutamate receptors	Gi/o	Gi/o	Adenylate cyclase inhibition, Calcium channel	Phospholipase C stimulation	8145723|8288585|9473604|11050109	11050109	04:00:00		Gi/o			0	1	0	0	-	G	-	-	3	1
GRM8	O00222	mGlu8	296	GRM8	GPRC1H;MGLUR8	C (Glutamate)	Amino acid receptors	Metabotropic glutamate receptors	Gi/o		Adenylate cyclase inhibition		9016353|7722646|9473604		03:00:00		Gi/o			0	1	0	0	-	G	-	-	3	1
GPC6A	Q5T6X5	GPRC6	55	GPRC6A		C (Glutamate)	Orphan receptors	Class C Orphans	Gq/11		Phospholipase C stimulation		24008333|15576628		02:00:00			Gq/11		0	0	1	0	-	-	G	-	3	1
FZD3	Q9NPG1	FZD3	231	FZD3		F (Frizzled)	Protein receptors	Frizzled	Gs, G protein (identity unknown)				17804197|18420933		02:00:00	Gs				1	0	0	0	G	-	-	-	3	1
FZD1	Q9UP38	FZD1	229	FZD1		F (Frizzled)	Protein receptors	Frizzled		Gi/o, Gq/11	Other - See Comments	Phospholipase C stimulation, Other - See Comments	10557084|15923619|16672224|17595165	16672224|17595165	04:00:00		Gi/o	Gq/11		0	2	2	0	-	G	G	-	2	1
FZD2	Q14332	FZD2	230	FZD2		F (Frizzled)	Protein receptors	Frizzled	Gi/o, G protein (identity unknown)		Calcium channel, Other - See Comments		12471263|16920709|17684012		03:00:00		Gi/o			0	1	0	0	-	G	-	-	3	1
FZD4	Q9ULV1	FZD4	232	FZD4		F (Frizzled)	Protein receptors	Frizzled	G12/13	G12/13			17614820|16602827	27458145	02:00:00				G12/13	0	0	0	1	-	-	-	G	3	1
FZD6	O60353	FZD6	234	FZD6		F (Frizzled)	Protein receptors	Frizzled	Gi/o, Gq/11, G protein independent mechanism	Gi/o		Other - See Comments	16936075	21128903	01:00:00		Gi/o	Gq/11		0	1	1	0	-	G	G	-	2	1
FZD7	O75084	FZD7	235	FZD7		F (Frizzled)	Protein receptors	Frizzled	Gs, Gi/o			Other - See Comments	24032637	24032637	01:00:00	Gs	Gi/o			1	1	0	0	G	G	-	-	2	1
FZD9	O00144	FZD9	237	FZD9	FZD3	F (Frizzled)	Protein receptors	Frizzled	Gi/o				27402827		01:00:00		Gi/o			0	1	0	0	-	G	-	-	3	1
FZD10	Q9ULW2	FZD10	238	FZD10		F (Frizzled)	Protein receptors	Frizzled		G12/13				28126591					G12/13	0	0	0	2	-	-	-	G	3	1
SMO	Q99835	SMO	239	SMO	SMOH	F (Frizzled)	Protein receptors	Frizzled	Gi/o, G12/13			Phospholipase A2 stimulation	14723707|16885213		02:00:00		Gi/o		G12/13	0	1	0	1	-	G	-	G	2	1
CALCR+RAMP3		AMY3	47			B1 (Secretin)		Calcitonin receptors	Gs							Gs				1	0	0	0	G	-	-	-	3	1
CALCR+RAMP2	P30988-2	CALCR		B1 (Secretin)	Peptide receptors	Calcitonin receptors	1 day, 19:00:00	Gs		Adenylate cyclase stimulation	Phospholipase C stimulation	15692146|14623894|25815174	11459804|8732687|25815174|1646739	03:00:00	Gs				1'				G	-	-	-
CALCR+RAMP3	P30988-2	CALCR		B1 (Secretin)	Peptide receptors	Calcitonin receptors	1 day, 19:00:00	Gs		Adenylate cyclase stimulation	Phospholipase C stimulation	15692146|14623894|25815174	11459804|8732687|25815174|1646739	03:00:00	Gs				1'				G	-	-	-

## Sheet: Merged_couplings
#	Rec UniProt	Cl	Rec		Gs	Golf	Gi1	Gi2	GoA	GoB	Gz	Gq	G11	G14	G15	G12	G13	#Gprot	Cl	Rec	GtP Gs	GtP Gi/o	GtP Gq /11	GtP G12 /13	# Fam	Gs	Gi/o	Gq /11	G12 /13	# Gs	# Gi/o	# Gq /11	# G12 /13	BIG-Gs	BIG-Golf	BIG-Gi1	BIG-Gi2	BIG-GoA	BIG-GoB	BIG-Gz	BIG-Gq	BIG-G11	BIG-G14	BIG-G15	BIG-G12	BIG-G13	B-Gs-Log EmEC	B-Golf-Log EmEC	B-Gi1-Log EmEC
1	GPR4	A	GPR4		9.74377		6.25536	6.31107				8.03571	7.92905	7.0806	7.60698			7	A	GPR4	1	1	1	1	4	1	1	1	1	1	2	4		B-G	--G	B-G	B-G	--G	--G	--G	B-G	B-G	B-G	B-G	--G	--G	9.74377		6.25536
1	CNR1	A	CB1				9.39236	9.20183	9.52132	9.54336	9.41935			7.12694		9.42892	8.84849	8	A	CB1	2	1			4	1	1	1	1		5	1	2	--G	--G	BIG	BIG	BIG	BIG	B-G	---	---	BI-	B--	BI-	BI-			9.56899
1	AA1R	A	A1		6.72794	6.54861			8.84087	8.76494	8.61571	7.32431	7.32431	7.76382	8.26971	7.51368		10	A	A1	2	1	2		4	1	1	1	1	2	3	4	1	-IG	-IG	--G	--G	BIG	BIG	BIG	-IG	-IG	-IG	BIG	BI-	---
1	ADRB1	A	β1		10.7753	9.72204	8.6388	8.6388	8.09205	8.24255	8.51172	7.93737		8.78747			7.72824	10	A	β1	1	2			4	1	1	1	1	2	5	2	1	BIG	-IG	-IG	-IG	BIG	BIG	BIG	BI-	-I-	BI-	B--	B--	BI-	11.6298
1	ADA1A	A	α1A		9.49005	10.2867	8.45479		8.52951			10.006	9.96272	9.58907	9.20091	8.48863	9.49969	10	A	α1A			1	2	4	1	1	1	1	2	2	4	2	BI-	-I-	BI-	-I-	BI-	-I-	-I-	BIG	BIG	BIG	BIG	-IG	-IG	8.5775		7.89879
1	PF2R	A	FP		10.7958	10.6792			8.5739	8.61278	8.87562	10.6132	10.6389	10.2865	9.94858	9.73904	10.0366	11	A	FP	2		1		4	1	1	1	1	2	3	4	2	-IG	-IG	-I-	-I-	BI-	BI-	BI-	BIG	BIG	BIG	BIG	BI-	BI-
1	LPAR4	A	LPA4		8.72669	8.65594	8.53993	8.53993	8.61214	8.61214	8.5963	8.09774	8.09774	8.35086	8.35554		8.58863	12	A	LPA4	1	1	1	1	4	1	1	1	1	2	5	4	1	-IG	-IG	-IG	-IG	-IG	-IG	-IG	-IG	-IG	-IG	-IG	--G	-IG
1	ADA2A	A	α2A		7.34778	7.03639	10.2302	10.1989	10.1515	10.3398	10.9833	7.31357	7.21481	7.25048	8.2257	8.13115	7.85626	13	A	α2A	2	1			4	1	1	1	1	2	5	4	2	BIG	-IG	BIG	BIG	BIG	BIG	BIG	BI-	BI-	BI-	BI-	BI-	BI-	7.30271		10.4869
1	OX2R	A	OX2		8.85441	8.88697	9.05301	8.91248	9.35541	9.53861	10.2159	10.7301	10.6878	10.4338	9.00164	9.21386	8.85119	13	A	OX2	1	1	1		4	1	1	1	1	2	5	4	2	-IG	-IG	BIG	BIG	BIG	BIG	BIG	BIG	BIG	BIG	BIG	BI-	BI-			8.72842
1	HRH1	A	H1		8.29726	9.10912	9.02797	8.92914	8.74124	8.74357	9.30629	9.58332	9.65835	9.54302	9.62079	8.39695	7.51076	13	A	H1			1		4	1	1	1	1	2	5	4	2	BI-	-I-	BI-	BI-	BI-	BI-	BI-	BIG	BIG	BIG	BIG	BI-	BI-	7.50989		8.407
1	BKRB2	A	B2		10.2344	9.92084	10.839	10.6333	10.4173	10.6989	10.5029	11.8605	11.8189	11.8147	11.339	11.606	11.2132	13	A	B2	1	1	1		4	1	1	1	1	2	5	4	2	-IG	-IG	BIG	BIG	BIG	BIG	BIG	BIG	BIG	BIG	BIG	BI-	BI-			9.85723
1	EDNRA	A	ETA		10.9533	11.5967	11.8622	11.8983	11.8058	11.8838	12.314	11.9771	11.9353	12.0781	10.9988	12.7448	11.735	13	A	ETA			1		4	1	1	1	1	2	5	4	2	BI-	-I-	BI-	BI-	BI-	BI-	BI-	BIG	BIG	BIG	BIG	BI-	BI-	10.121		11.3302
1	CCKAR	A	CCK1		11.2592	12.43	11.6403	11.6061	11.5751	11.4725	11.0227	12.1655	12.256	12.4293	11.5449	12.4488	11.6021	13	A	CCK1	2		1		4	1	1	1	1	2	5	4	2	BIG	-IG	BI-	BI-	BI-	BI-	BI-	BIG	BIG	BIG	BIG	BI-	BI-	10.0784		10.4305
1	GPR39	A	GPR39									5.65504	5.41815	5.6115	4.9276		6.62053	5	A	GPR39	2		1	2	3	1		1	1			4	1	--G	--G	B--	B--	B--	B--	---	B-G	B-G	B-G	B-G	--G	B-G			5.53646
1	S1PR2	A	S1P2		8.40192	8.29059						9.47577	9.47577	9.91366	9.17495	10.2578		7	A	S1P2	1		1	1	3	1		1	1	2		4	1	-IG	-IG	-I-	-I-	-I-	-I-	-I-	-IG	-IG	-IG	-IG	-IG	--G
1	FFAR4	A	FFA4				8.13442	8.20573	8.03914	8.14858		7.78768	7.83066	8.1237	7.62851		7.41423	9	A	FFA4			1		3		1	1	1		4	4	1	-I-	-I-	BI-	BI-	BI-	BI-	-I-	BIG	BIG	BIG	BIG	-I-	BI-			6.70049
1	P2RY2	A	P2Y2				7.09212	7.11603	7.30549	7.41048	7.46018	6.99281	6.92219	6.74728	7.34384			9	A	P2Y2		2	1	2	3		1	1	1		5	4		---	---	B-G	B-G	B-G	B-G	B-G	B-G	B-G	B-G	B-G	--G	--G			7.09212
1	PAR1	A	PAR1				7.67198	8.00164	8.21235	8.44972	8.55251	8.8057	8.79424	8.273	8.64053		8.95157	10	A	PAR1					3		1	1	1		5	4	1	---	---	BI-	BI-	BI-	BI-	BI-	BI-	BI-	BI-	BI-	-I-	BI-			5.79248
1	PE2R3	A	EP3				11.4735	11.3809	11.502	11.4249	11.6015	9.79629	9.79629	9.0193	9.47454		10.4075	10	A	EP3		1	2		3		1	1	1		5	4	1	-I-	-I-	BIG	BIG	BIG	BIG	BIG	-IG	-IG	BIG	BIG	-I-	BI-			11.4363
1	PE2R1	A	EP1				8.46111	8.86109	9.11075	8.80701		10.3299	10.3446	9.82263	10.1522	10.7934	9.3763	10	A	EP1		2	1		3		1	1	1		4	4	2	-I-	-I-	BIG	BIG	BIG	BIG	--G	BIG	BIG	BIG	BIG	BI-	BI-			7.2119
1	LPAR1	A	LPA1				9.92016	9.49457	9.79036	9.23938		8.79156	8.48969	8.1944	8.72137	9.38778	9.70669	10	A	LPA1		1	1	1	3		1	1	1		4	4	2	---	---	BIG	-IG	BIG	-IG	--G	BIG	BIG	BIG	BIG	-IG	BIG			10.3457
1	GALR2	A	GAL2				9.56297	9.56297	9.40074	9.40074		10.4521	10.4521	10.1453	9.56946	10.0876	9.62769	10	A	GAL2		2	1	2	3		1	1	1		4	4	2	---	---	-IG	-IG	-IG	-IG	--G	-IG	-IG	-IG	-IG	-IG	-IG
1	5HT2C	A	5-HT2C				9.39193	9.37427	9.55054	9.743	10.6431	9.67675	9.67675	9.85485	10.1464	9.72865	9.3398	11	A	5-HT2C		2	1		3		1	1	1		5	4	2	-I-	-I-	BIG	BIG	BIG	BIG	BIG	-IG	-IG	-IG	BIG	BI-	BI-			8.88402
1	AGTR1	A	AT1				10.3763	10.42	10.1019	9.92769	9.4452	11.5893	11.6834	11.2439	11.2873	11.1811	10.8475	11	A	AT1		1	1		3		1	1	1		5	4	2	-I-	-I-	BIG	BIG	BIG	BIG	BIG	BIG	BIG	BIG	BIG	BI-	BI-			8.86616
1	CLTR2	A	CysLT2				8.95881	8.88688	9.04137	9.3033	10.4142	10.5667	10.483	10.6112	9.98506	9.90591	9.08685	11	A	CysLT2		2	1		3		1	1	1		5	4	2	---	---	BIG	BIG	BIG	BIG	BIG	BIG	BIG	BIG	BIG	BI-	BI-			8.89067
1	LT4R1	A	BLT1				11.134	11.2103	10.8894	11.0954	10.6471	8.8492	8.53464	9.3365	10.6264	10.5443	10.0985	11	A	BLT1		1	1		3		1	1	1		5	4	2	-I-	-I-	BIG	BIG	BIG	BIG	BIG	BIG	BIG	BIG	BIG	BI-	BI-			11.969
1	PAR2	A	PAR2				7.69721	7.78743	7.78486	8.04214	7.94515	7.44375	7.90644	7.60257	7.73561	8.75524	8.2392	11	A	PAR2					3		1	1	1		5	4	2	-I-	-I-	BI-	BI-	BI-	BI-	BI-	BI-	BI-	BI-	BI-	BI-	BI-			7.14361
1	LPAR2	A	LPA2				9.74104	9.84874	9.82857	10.1514	9.61825	9.37923	9.30527	9.21792	8.96029	9.86263	9.9212	11	A	LPA2		1	1	1	3		1	1	1		5	4	2	-I-	-I-	BIG	BIG	BIG	BIG	B-G	BIG	BIG	BIG	BIG	-IG	BIG			9.96248
1	S1PR3	A	S1P3				9.28062	9.28062	9.37471	9.37471	9.32066	9.06692	9.06692	9.18731	9.30678	9.3682	9.20814	11	A	S1P3		1	1	1	3		1	1	1		5	4	2	-I-	-I-	-IG	-IG	-IG	-IG	-IG	-IG	-IG	-IG	-IG	-IG	-IG
1	GHSR	A	Ghrelin				10.5635	10.5011	11.0015	11.0692	11.1366	10.9929	10.9139	11.1626	11.0325	11.9036	11.0418	11	A	Ghrelin		2	1	2	3		1	1	1		5	4	2	-I-	-I-	BIG	BIG	BIG	BIG	BIG	BIG	BIG	BIG	BIG	BIG	BIG			9.91826
1	GPR55	A	GPR55														8.61485	1	A	GPR55			1	1	2			1	1				1	---	---	---	---	---	---	---	--G	--G	--G	--G	--G	-IG
1	MTLR	A	motilin									11.9986	11.9986	11.4759	10.331	11.0923	10.8285	6	A	motilin			1	1	2			1	1			4	2	-I-	-I-	-I-	-I-	-I-	-I-	-I-	-IG	-IG	-IG	-IG	-IG	-IG
2	LPAR5	A	LPA5																A	LPA5			1	1	2			1	1					---	---	-I-	-I-	-I-	-I-	-I-	--G	--G	--G	--G	--G	--G
2	P2RY6	A	P2Y6																A	P2Y6			1	2	2			1	1					---	---	---	---	---	---	---	--G	--G	--G	--G	--G	--G
1	LPAR6	A	LPA6		7.50461	7.17191	8.3816	8.3816	8.51383	8.51383	8.18934					8.69841	8.7161	9	A	LPA6	1	1		1	3	1	1		1	2	5		2	-IG	-IG	-IG	-IG	-IG	-IG	-IG	-I-	-I-	-I-	-I-	-IG	-IG
1	S1PR5	A	S1P5				8.05097	8.05097									7.02769	3	A	S1P5		1		1	2		1		1		2		1	---	---	-IG	-IG	--G	--G	--G	---	---	---	---	--G	-IG
1	5HT4R	A	5-HT4		8.63001	8.54843										8.25764	8.22116	4	A	5-HT4	1			2	2	1			1	2			2	-IG	-IG	-I-	-I-	-I-	-I-	-I-	-I-	-I-	-I-	-I-	-IG	-IG
1	APJ	A	APLNR				10.4386	10.4443	9.78793	9.84271	9.33196					8.5756		6	A	APLNR		1			2		1		1		5		1	---	---	BIG	BIG	BIG	BIG	BIG	-I-	-I-	---	B--	BI-	B--			11.2801
1	GP183	A	GPR183				10.4414	10.5266	10.4008	10.6629	10.0663					9.91838		6	A	GPR183		1			2		1		1		5		1	---	---	BIG	BIG	BIG	BIG	BIG	---	---	---	B--	BI-	---			10.9059
1	OPRK	A	𝜅				10.8726	10.7842	10.6677	10.8123	10.8427					8.30938		6	A	𝜅		1		2	2		1		1		5		1	---	---	BIG	BIG	BIG	BIG	BIG	---	---	-I-	B--	-IG	--G			12.0378
1	FFAR3	A	FFA3				6.52919	6.63888	6.52134	6.52261	6.24457					6.3441	5.82371	7	A	FFA3		1			2		1		1		5		2	---	---	BIG	BIG	BIG	BIG	BIG	---	---	-I-	-I-	BI-	BI-			6.84875
1	S1PR1	A	S1P1				9.05176	8.95543	8.71367	8.82852	8.96749					8.58173	7.97531	7	A	S1P1		1			2		1		1		5		2	---	---	BIG	BIG	BIG	BIG	-IG	---	---	---	B--	BI-	BI-			9.30538
2	S1PR4	A	S1P4																A	S1P4		1		1	2		1		1					---	---	--G	--G	--G	--G	--G	---	---	---	---	--G	--G
1	PI2R	A	IP		11.1228	10.8786						10.3348	10.3348					4	A	IP	1	2	2		3	1	1	1		2		2		-IG	-IG	--G	--G	--G	--G	--G	-IG	-IG	--G	--G	-I-	---
1	FFAR1	A	FFA1		6.56254	6.58379			6.61557	6.61557	6.08122				5.76272			6	A	FFA1	2	2	1		3	1	1	1		2	3	1		-IG	-IG	--G	--G	-IG	-IG	-IG	--G	--G	--G	-IG	-I-	-I-
1	HRH2	A	H2		8.36127	7.56367			6.81365	6.76498	6.33978				8.50324			6	A	H2	2		1		3	1	1	1		2	3	1		BIG	-IG	---	---	BI-	BI-	BI-	--G	--G	--G	B-G	B--	B--	9.0082
1	ADA2B	A	α2B		8.31688	7.97588	9.75138	9.64034	9.98846	10.197	10.2425				8.09941			8	A	α2B	2	1			3	1	1	1		2	5	1		-IG	-IG	BIG	BIG	BIG	BIG	BIG	-I-	-I-	-I-	BI-	-I-	-I-			9.49875
1	ACM2	A	M2		7.26632	6.7976	9.75839	9.64453	9.81065	10.0284	9.38394	8.0595	8.0595	7.28042	8.26674			11	A	M2	2	1	2		3	1	1	1		2	5	4		BIG	-IG	BIG	BIG	BIG	BIG	BIG	-IG	-IG	BIG	BIG	-I-	-I-	7.60684		9.92879
1	ACM1	A	M1		8.15819	8.36118	8.06524	7.95694	7.7026	7.82946	8.30117	9.756	9.84456	9.68943	9.01681			11	A	M1			1		3	1	1	1		2	5	4		BI-	-I-	BI-	BI-	BI-	BI-	BI-	BIG	BIG	BIG	BIG	-I-	-I-	7.83099		6.92933
1	NTR1	A	NTS1		9.48719	9.31782	10.7298	10.7298	10.2213	10.2213	10.4885	11.6053	11.6053	11.5333	9.13451			11	A	NTS1	2	2	1		3	1	1	1		2	5	4		-IG	-IG	-IG	-IG	-IG	-IG	-IG	-IG	-IG	-IG	-IG	-I-	-I-
1	MCHR1	A	MCH1		9.6005	9.61464	10.0797	10.0797	9.79546	9.79546	8.85935	10.51	10.51	9.10021	7.97558			11	A	MCH1	1	1	1		3	1	1	1		2	5	4		-IG	-IG	-IG	-IG	-IG	-IG	-IG	-IG	-IG	-IG	-IG	-I-	-I-
1	OX1R	A	OX1		10.0558	10.0809	11.1468	11.1468	10.5993	10.5993	11.1846	11.1902	11.1902	11.4686	11.3428			11	A	OX1	1	1	1		3	1	1	1		2	5	4		-IG	-IG	-IG	-IG	-IG	-IG	-IG	-IG	-IG	-IG	-IG	-I-	-I-
1	EDNRB	A	ETB		11.5602	11.4924	12.4739	12.4739	11.9293	11.9293	12.0607	11.6852	11.6852	12.0673	12.0793			11	A	ETB	1	1	1		3	1	1	1		2	5	4		-IG	-IG	-IG	-IG	-IG	-IG	-IG	-IG	-IG	-IG	-IG	-I-	-I-
2	FSHR	A	FSH																A	FSH	1	1	1		3	1	1	1						--G	--G	--G	--G	--G	--G	--G	--G	--G	--G	--G	---	---
2	PKR2	A	PKR2																A	PKR2	2	2	1		3	1	1	1						--G	--G	--G	--G	--G	--G	--G	--G	--G	--G	--G	---	---
1	P2RY1	A	P2Y1												8.21052			1	A	P2Y1		2	1		2		1	1				1		---	---	--G	--G	--G	--G	--G	--G	--G	--G	-IG	---	---
1	5HT6R	A	5-HT6		8.40851	8.36397												2	A	5-HT6	1		2		2	1		1		2				-IG	-IG	---	---	---	---	-I-	--G	--G	--G	--G	---	-I-
1	V2R	A	V2		12.523	12.9214						9.94515	9.98675					4	A	V2	1				2	1		1		2		2		BIG	-IG	B--	B--	---	---	---	BI-	BI-	B--	B--	---	B--	12.0562		8.07116
1	PTAFR	A	PAF						11.0133	11.0133	11.0614				10.9456			4	A	PAF		1	1		2		1	1			3	1		-I-	-I-	--G	--G	-IG	-IG	-IG	--G	--G	--G	-IG	---	-I-
1	P2Y11	A	P2Y11			8.03992						8.23779	8.23779	8.08106	7.51319			5	A	P2Y11	2		1		2	1		1		1		4		--G	-IG	-I-	-I-	-I-	-I-	-I-	-IG	-IG	-IG	-IG	-I-	-I-
1	AA2BR	A	A2B		7.79805	7.30777						7.02465	7.02465	7.65939	8.01331			6	A	A2B	1		2		2	1		1		2		4		BIG	-IG	-I-	-I-	-I-	-I-	-I-	-IG	-IG	-IG	B-G	-I-	-I-	8.02387
1	AA2AR	A	A2A		7.79012	7.78301						7.65373	7.65373	7.79782	7.62422			6	A	A2A	1		2		2	1		1		2		4		BIG	-IG	-I-	-I-	-I-	-I-	-I-	-IG	-IG	-IG	B-G	B--	B--	7.82972
1	NK2R	A	NK2		10.35	10.3742						11.8217	11.8217	11.8488	10.2405			6	A	NK2	1		1		2	1		1		2		4		-IG	-IG	-I-	-I-	-I-	-I-	-I-	-IG	-IG	-IG	-IG	-I-	-I-
1	NK1R	A	NK1		11.25	11.2205						11.8034	11.8034	11.9002	10.7388			6	A	NK1	1		1		2	1		1		2		4		-IG	-IG	-I-	-I-	-I-	-I-	-I-	-IG	-IG	-IG	-IG	-I-	-I-
1	5HT2B	A	5-HT2B							8.86476	10.0211	9.94206	9.89821	9.76348	8.71952			6	A	5-HT2B			1		2		1	1			2	4		-I-	---	-I-	-I-	-I-	BI-	BI-	BIG	BIG	BIG	BIG	---	-I-
1	OXYR	A	OT				9.20602	9.20602				10.0363	10.0039	9.18506	9.27614			6	A	OT		2	1		2		1	1			2	4		-I-	-I-	-IG	-IG	--G	--G	--G	BIG	BIG	BIG	B-G	---	---
1	C5AR1	A	C5a1				11.0753	11.297	10.8975	11.3486	10.5692				11.2606			6	A	C5a1		1	2		2		1	1			5	1		---	---	B-G	B-G	B-G	B-G	B-G	--G	--G	--G	B-G	---	---			11.0753
1	MTR1A	A	MT1				12.0947	12.1169	12.0528	12.0616	12.3344				11.0166			6	A	MT1		1	2		2		1	1			5	1		---	---	BIG	BIG	BIG	BIG	-IG	--G	--G	--G	B-G	---	---			12.1089
1	OPRM	A	μ				9.56354	9.56037	9.40678	9.55292	9.95618				7.70309			6	A	μ		1	2		2		1	1			5	1		---	---	BIG	BIG	BIG	BIG	BIG	--G	--G	--G	B-G	---	---			10.1924
1	5HT1A	A	5-HT1A				8.81994	8.59294	9.29138	9.37007	9.05238			8.06687	8.05111			7	A	5-HT1A		1			2		1	1			5	2		-I-	-I-	BIG	BIG	BIG	BIG	BIG	-I-	-I-	BI-	BI-	-I-	-I-			9.61955
1	OPRD	A	𝛅				10.4763	10.3592	10.1852	10.3503	11.7515			8.68113	8.54461			7	A	𝛅		1			2		1	1			5	2		---	---	BIG	BIG	BIG	BIG	B-G	---	---	BI-	BI-	-I-	B--			10.9539
1	OPRX	A	NOP				11.5291	11.3499	11.4384	11.6631	12.1475			10.1719	10.0195			7	A	NOP		1			2		1	1			5	2		---	---	BIG	BIG	BIG	BIG	BIG	-I-	-I-	BI-	BI-	-I-	-I-			12.0807
1	SSR2	A	SST2				11.2619	11.2088	10.9878	11.2501	11.4186			9.95688	9.62224			7	A	SST2		1			2		1	1			5	2		---	---	BIG	BIG	BIG	BIG	BIG	B--	---	BI-	BI-	B--	---			12.1893
1	OGR1	A	GPR68				8.36272	8.45471	9.0736	9.34686		9.401	9.346	9.1731	8.11456			8	A	GPR68		1	1		2		1	1			4	4		B--	---	B-G	B-G	B-G	B-G	--G	B-G	B-G	B-G	B-G	B--	B--	8.34501		8.36272
1	ACM4	A	M4				9.85947	9.97655	9.89777	10.1864	9.51911	7.50428		7.66342	8.22792			8	A	M4		1			2		1	1			5	3		-I-	---	BIG	BIG	BIG	BIG	BIG	BI-	-I-	BI-	BI-	-I-	-I-			10.1147
1	GPR17	A	GPR17				9.09066	9.09066	8.30543	8.30543	7.15522	8.89523	8.89523	7.78761				8	A	GPR17		1	2		2		1	1			5	3		---	---	-IG	-IG	-IG	-IG	-IG	-IG	-IG	-IG	--G	-I-	-I-
1	LT4R2	A	BLT2				9.70282	9.68711	8.36311	8.508	8.82551	7.96457	7.96457	7.60472				8	A	BLT2		1	2		2		1	1			5	3		---	---	BIG	BIG	BIG	BIG	B-G	-IG	-IG	-IG	--G	-I-	---			10.405
1	5HT2A	A	5-HT2A				8.4746	8.33936	8.14591	8.26238	9.28059	10.0278	10.0478	10.2605	9.31788			9	A	5-HT2A		2	1		2		1	1			5	4		-I-	-I-	BIG	BIG	BIG	BIG	BIG	BIG	BIG	BIG	BIG	-I-	-I-			7.85471
1	ACM3	A	M3				8.71742	8.5345	8.3867	8.40795	8.55037	9.83495	9.94412	9.84077	9.6057			9	A	M3			1		2		1	1			5	4		-I-	-I-	BI-	BI-	BI-	BI-	BI-	BIG	BIG	BIG	BIG	-I-	-I-			7.43284
1	BKRB1	A	B1				8.74989	8.79025	8.92254	9.04464	8.42275	8.26357	8.17995	8.95049	9.08834			9	A	B1		1	1		2		1	1			5	4		-I-	-I-	BIG	BIG	BIG	BIG	BIG	B-G	B-G	BIG	BIG	-I-	-I-			7.65442
1	CLTR1	A	CysLT1				10.2349	10.2806	9.97695	10.1611	10.1865	10.2311	10.1466	9.91337	9.95348			9	A	CysLT1		2	1		2		1	1			5	4		-I-	-I-	BIG	BIG	BIG	BIG	BIG	BIG	BIG	BIG	BIG	-I-	---			10.1592
1	FFAR2	A	FFA2				6.27838	6.21389	5.68527	5.68527	4.83218	6.03059	6.0691	6.12732	6.11231			9	A	FFA2		2	1		2		1	1			5	4		-I-	-I-	B-G	B-G	-IG	-IG	-IG	BIG	BIG	B-G	-IG	---	-I-			6.27838
1	FPR2	A	FPR2/ALX				8.32387	8.32387	8.07992	8.07992	8.13666	7.95589	7.95589	9.37695	7.0882			9	A	FPR2/ALX		1	2		2		1	1			5	4		---	---	-IG	-IG	-IG	-IG	-IG	-IG	-IG	-IG	-IG	-I-	-I-
1	GNRHR	A	GnRH1				10.4607	10.4607	10.0514	10.0514	10.4926	11.2417	11.1958	10.7664	10.3336			9	A	GnRH1		2	1		2		1	1			5	4		-I-	-I-	-IG	-IG	-IG	-IG	-IG	BIG	BIG	BIG	B-G	---	---
1	LPAR3	A	LPA3				8.50482	8.50482	8.68742	8.68742	8.92402	8.31169	8.31169	8.4472	8.17192			9	A	LPA3		1	1		2		1	1			5	4		-I-	-I-	-IG	-IG	-IG	-IG	-IG	-IG	-IG	-IG	-IG	-I-	-I-
1	MRGX2	A	MRGPRX2				8.93497	8.93497	8.84062	8.84062	8.64749	8.86407	8.86407	8.93484	8.36135			9	A	MRGPRX2		1	1		2		1	1			5	4		-I-	-I-	-IG	-IG	-IG	-IG	-IG	-IG	-IG	-IG	-IG	-I-	-I-
1	V1AR	A	V1A				9.94193	9.94516	9.63835	9.51921	9.81121	11.5652	11.6229	10.6808	9.79886			9	A	V1A			1		2		1	1			5	4		-I-	-I-	BI-	BI-	BI-	BI-	BI-	BIG	BIG	BIG	BIG	-I-	---			8.83049
2	LSHR	A	LH																A	LH	1		2		2	1		1						--G	--G	---	---	---	---	---	--G	--G	--G	--G	---	---
2	NPSR1	A	NPS																A	NPS	2		1		2	1		1						--G	--G	---	---	---	---	---	--G	--G	--G	--G	---	---
2	PKR1	A	PKR1																A	PKR1	2		1		2	1		1						--G	--G	---	---	---	---	---	--G	--G	--G	--G	---	---
2	TAAR1	A	TA1																A	TA1	1		2		2	1		1						--G	--G	---	---	---	---	---	--G	--G	--G	--G	---	---
2	TSHR	A	TSH																A	TSH	1		2		2	1		1						--G	--G	---	---	---	---	---	--G	--G	--G	--G	---	---
2	5HT5A	A	5-HT5A																A	5-HT5A		1	2		2		1	1						---	---	--G	--G	--G	--G	--G	--G	--G	--G	--G	---	---
2	CXCR1	A	CXCR1																A	CXCR1		1	2		2		1	1						---	---	--G	--G	--G	--G	--G	--G	--G	--G	--G	---	---
2	GPR18	A	GPR18																A	GPR18		1	1		2		1	1						---	---	--G	--G	--G	--G	--G	--G	--G	--G	--G	---	---
2	MAS	A	MAS1																A	MAS1		1	1		2		1	1						---	---	--G	--G	--G	--G	--G	--G	--G	--G	--G	---	---
2	MRGRD	A	MRGPRD																A	MRGPRD		1	1		2		1	1						---	---	--G	--G	--G	--G	--G	--G	--G	--G	--G	---	---
2	NPY2R	A	Y2																A	Y2		1	2		2		1	1						---	---	--G	--G	--G	--G	--G	--G	--G	--G	--G	---	---
2	NPY4R	A	Y4																A	Y4		1	2		2		1	1						---	---	--G	--G	--G	--G	--G	--G	--G	--G	--G	---	---
2	OPN4	A	OPN4																A	OPN4		1	1		2		1	1						---	---	--G	--G	--G	--G	--G	--G	--G	--G	--G	---	---
2	QRFPR	A	QRFP																A	QRFP		1	1		2		1	1						---	---	--G	--G	--G	--G	--G	--G	--G	--G	--G	---	---
2	SUCR1	A	Succinate																A	Succinate		1	2		2		1	1						---	---	--G	--G	--G	--G	--G	--G	--G	--G	--G	---	---
1	P2RY4	A	P2Y4												8.03927			1	A	P2Y4			1		1			1				1		-I-	-I-	-I-	-I-	-I-	-I-	-I-	--G	--G	--G	-IG	-I-	-I-
1	OXGR1	A	Oxoglutarate									6.2917	6.2917					2	A	Oxoglutarate			1		1			1				2		-I-	-I-	-I-	-I-	-I-	-I-	-I-	-IG	-IG	--G	--G	---	---
1	ADA1D	A	α1D									8.42566	8.42566	8.51914				3	A	α1D			1		1			1				3		-I-	-I-	---	---	---	---	---	-IG	-IG	-IG	--G	---	---
1	V1BR	A	V1B									11.8063	11.8063	10.7137				3	A	V1B			1		1			1				3		-I-	-I-	-I-	-I-	-I-	-I-	-I-	-IG	-IG	-IG	--G	-I-	---
1	ACM5	A	M5									10.4381	10.4381	10.393	10.0255			4	A	M5			1		1			1				4		-I-	-I-	-I-	-I-	-I-	-I-	-I-	-IG	-IG	-IG	-IG	-I-	-I-
1	ADA1B	A	α1B									9.38419	9.38419	9.56935	7.74661			4	A	α1B			1		1			1				4		-I-	-I-	-I-	-I-	-I-	-I-	-I-	-IG	-IG	-IG	-IG	-I-	-I-
1	GASR	A	CCK2									12.3315	12.3315	12.4288	11.4455			4	A	CCK2			1		1			1				4		-I-	-I-	-I-	-I-	-I-	-I-	-I-	-IG	-IG	-IG	-IG	-I-	-I-
1	GRPR	A	BB2									12.2545	12.2545	12.1003	10.6725			4	A	BB2			1		1			1				4		-I-	-I-	-I-	-I-	-I-	-I-	-I-	-IG	-IG	-IG	-IG	-I-	-I-
1	KISSR	A	Kisspeptin									11.198	11.198	11.1502	8.49701			4	A	Kisspeptin			1		1			1				4		-I-	-I-	-I-	-I-	-I-	-I-	-I-	-IG	-IG	-IG	-IG	-I-	-I-
1	MCHR2	A	MCH2									10.6988	10.6988	9.99586	9.8167			4	A	MCH2			1		1			1				4		-I-	-I-	-I-	-I-	-I-	-I-	-I-	-IG	-IG	-IG	-IG	-I-	-I-
1	MRGX1	A	MRGPRX1									8.61519	8.61519	8.36855	8.53133			4	A	MRGPRX1			1		1			1				4		-I-	-I-	-I-	-I-	-I-	-I-	-I-	-IG	-IG	-IG	-IG	-I-	-I-
1	NK3R	A	NK3									10.4651	10.4651	10.5343	9.18483			4	A	NK3			1		1			1				4		-I-	-I-	-I-	-I-	-I-	-I-	-I-	-IG	-IG	-IG	-IG	-I-	-I-
1	NMBR	A	BB1									12.7357	12.7357	12.5862	10.1273			4	A	BB1			1		1			1				4		-I-	-I-	-I-	-I-	-I-	-I-	-I-	-IG	-IG	-IG	-IG	-I-	-I-
1	NMUR1	A	NMU1									10.93	10.93	10.8079	8.46384			4	A	NMU1			1		1			1				4		-I-	-I-	-I-	-I-	-I-	-I-	---	-IG	-IG	-IG	-IG	-I-	-I-
1	NMUR2	A	NMU2									11.1738	11.1738	11.134	10.949			4	A	NMU2			1		1			1				4		-I-	-I-	-I-	-I-	-I-	-I-	-I-	-IG	-IG	-IG	-IG	-I-	-I-
1	TA2R	A	TP									11.081	11.081	11.0559	8.36248			4	A	TP			1		1			1				4		-I-	-I-	-I-	-I-	-I-	-I-	-I-	-IG	-IG	-IG	-IG	-I-	-I-
1	TRFR	A	TRH1									11.889	11.889	12.1039	9.49987			4	A	TRH1			1		1			1				4		-I-	-I-	-I-	-I-	-I-	-I-	-I-	-IG	-IG	-IG	-IG	-I-	-I-
1	UR2R	A	UT									11.4878	11.4878	11.5719	10.8967			4	A	UT			1		1			1				4		-I-	-I-	-I-	-I-	-I-	-I-	-I-	-IG	-IG	-IG	-IG	-I-	-I-
2	BRS3	A	BB3																A	BB3			1		1			1						---	---	---	---	---	---	---	--G	--G	--G	--G	---	---
2	GP139	A	GPR139																A	GPR139			1		1			1						---	---	---	---	---	---	---	--G	--G	--G	--G	---	---
2	GPR27	A	GPR27																A	GPR27			1		1			1						---	---	---	---	---	---	---	--G	--G	--G	--G	---	---
2	GPR75	A	GPR75																A	GPR75			1		1			1						---	---	---	---	---	---	---	--G	--G	--G	--G	---	---
2	MRGX3	A	MRGPRX3																A	MRGPRX3			1		1			1						---	---	---	---	---	---	---	--G	--G	--G	--G	---	---
2	MRGX4	A	MRGPRX4																A	MRGPRX4			1		1			1						---	---	---	---	---	---	---	--G	--G	--G	--G	---	---
2	NTR2	A	NTS2																A	NTS2			1		1			1						---	---	---	---	---	---	---	--G	--G	--G	--G	---	---
1	MC3R	A	MC3		10.3079						10.1563							2	A	MC3	1				2	1	1			1	1			BIG	--G	---	---	---	B--	BI-	---	---	-I-	B--	B--	B--	11.5051
1	ADRB3	A	β3		7.07098	6.80029												2	A	β3	1	2			2	1	1			2				-IG	-IG	--G	--G	--G	--G	--G	---	---	---	---	---	---
1	ADRB2	A	β2		9.5662	8.73654												2	A	β2	1	2			2	1	1			2				BIG	-IG	--G	--G	--G	--G	--G	---	---	-I-	B--	---	---	10.1956
1	DRD1	A	D1		8.95895	7.14746					7.45193							3	A	D1	1				2	1	1			2	1			BIG	-IG	---	---	---	B--	BI-	-I-	-I-	-I-	B--	---	---	10.6235
1	MC4R	A	MC4		9.32038	8.97719					8.61492							3	A	MC4	1				2	1	1			2	1			BIG	-IG	-I-	-I-	-I-	-I-	BI-	-I-	-I-	-I-	B--	---	B--	9.94154
1	DRD5	A	D5		9.33228	8.16455	7.4148	7.23784		7.96864								5	A	D5	1				2	1	1			2	3			BIG	-IG	BI-	BI-	-I-	BI-	-I-	-I-	-I-	-I-	B--	---	---	10.4422		7.09861
1	ADA2C	A	α2C				9.7115	9.71072	9.87258	10.0476	10.6294							5	A	α2C	2	1			2	1	1				5			--G	--G	BIG	BIG	BIG	BIG	BIG	---	---	-I-	B--	---	B--			10.5116
1	CNR2	A	CB2				10.2734	10.2502	9.95714	10.1745	9.94439							5	A	CB2	2	1			2	1	1				5			--G	--G	BIG	BIG	BIG	BIG	BIG	---	---	---	B--	---	---			10.8908
1	PE2R4	A	EP4		11.702	10.8361	10.7724	10.5418		9.30974	9.66301							6	A	EP4	1	2			2	1	1			2	4			BIG	-IG	BIG	BIG	--G	B-G	B-G	---	---	---	B--	B--	B--	12.4682		10.903
2	GPER1	A	GPER																A	GPER	2	1			2	1	1							--G	--G	--G	--G	--G	--G	--G	---	---	---	---	---	---
2	GPR12	A	GPR12																A	GPR12	1	1			2	1	1							--G	--G	--G	--G	--G	--G	--G	---	---	---	---	---	---
2	GPR6	A	GPR6																A	GPR6	1	1			2	1	1							--G	--G	--G	--G	--G	--G	--G	---	---	---	---	---	---
2	RXFP1	A	RXFP1																A	RXFP1	1	1			2	1	1							--G	--G	--G	--G	--G	--G	--G	---	---	---	---	---	---
2	RXFP2	A	RXFP2																A	RXFP2	1	1			2	1	1							--G	--G	--G	--G	--G	--G	--G	---	---	---	---	---	---
1	GPBAR	A	GPBA		7.914													1	A	GPBA	1				1	1				1				B-G	--G	---	---	---	---	---	---	---	---	---	---	---	7.914
1	PSYR	A	GPR65		8.69216													1	A	GPR65	1				1	1				1				B-G	--G	---	---	---	B--	---	---	---	---	---	---	B--	8.69216
1	MC5R	A	MC5			7.06876												1	A	MC5	1				1	1				1				--G	-IG	-I-	-I-	-I-	-I-	-I-	-I-	-I-	-I-	-I-	---	---
1	P2Y14	A	P2Y14								8.03494							1	A	P2Y14		1			1		1				1			---	---	--G	--G	--G	--G	-IG	-I-	-I-	-I-	---	---	---
1	PE2R2	A	EP2		10.5526	9.27032												2	A	EP2	1				1	1				2				BIG	-IG	---	---	---	---	B--	---	---	---	B--	B--	---	11.3086
1	PD2R	A	DP1		9.64646	9.49671												2	A	DP1	1				1	1				2				-IG	-IG	---	---	---	---	---	-I-	-I-	-I-	---	-I-	-I-
1	GP119	A	GPR119		9.79107	9.60925												2	A	GPR119	1				1	1				2				-IG	-IG	-I-	-I-	-I-	-I-	-I-	-I-	-I-	-I-	-I-	-I-	-I-
1	5HT7R	A	5-HT7		10.2832	10.2947												2	A	5-HT7	1				1	1				2				-IG	-IG	-I-	-I-	-I-	-I-	-I-	-I-	-I-	-I-	-I-	-I-	-I-
1	5HT1F	A	5-HT1F				8.45964	8.45964										2	A	5-HT1F		1			1		1				2			---	---	-IG	-IG	--G	--G	--G	---	---	---	---	---	---
1	FPR1	A	FPR1				8.29384	8.29384										2	A	FPR1		1			1		1				2			---	---	-IG	-IG	--G	--G	--G	---	---	-I-	---	---	---
1	GPR34	A	GPR34				8.24684	8.24684	8.01385	8.01385								4	A	GPR34		1			1		1				4			---	---	-IG	-IG	-IG	-IG	--G	---	---	---	---	---	---
1	HRH4	A	H4				9.05079	9.05079	7.90687	7.90687								4	A	H4		1			1		1				4			---	---	-IG	-IG	-IG	-IG	--G	---	---	---	-I-	---	---
1	NPBW1	A	NPBW1				8.63271	8.63271	7.37745	7.37745								4	A	NPBW1		1			1		1				4			---	---	-IG	-IG	-IG	-IG	--G	---	---	---	---	---	---
1	P2Y13	A	P2Y13				6.78878	6.78878	7.30054	7.30054								4	A	P2Y13		1			1		1				4			---	---	-IG	-IG	-IG	-IG	--G	-I-	-I-	-I-	-I-	---	-I-
1	5HT1B	A	5-HT1B				9.81592	9.84881	9.7712	9.79616	9.71579							5	A	5-HT1B		1			1		1				5			---	---	BIG	BIG	BIG	BIG	BIG	-I-	-I-	-I-	B--	-I-	---			10.64
1	5HT1D	A	5-HT1D				10.4411	10.5021	10.3713	10.2995	8.16912							5	A	5-HT1D		1			1		1				5			---	---	BIG	BIG	BIG	BIG	BIG	-I-	-I-	-I-	---	---	---			10.6096
1	5HT1E	A	5-HT1E				8.63328	8.63328	8.71033	8.71033	8.52836							5	A	5-HT1E		1			1		1				5			---	---	-IG	-IG	-IG	-IG	-IG	---	---	---	---	---	---
1	AA3R	A	A3				8.51433	8.50854	7.24504	7.54764	6.44115							5	A	A3		1			1		1				5			---	---	BIG	BIG	BIG	BIG	-IG	---	---	---	B--	---	---			8.6394
1	CCR5	A	CCR5				10.8917	10.8692	10.9343	11.1085	11.5283							5	A	CCR5		1			1		1				5			---	---	B-G	B-G	B-G	B-G	B-G	---	---	---	B--	---	---			10.8917
1	CCR6	A	CCR6				9.34285	10.1929	9.5309	10.1105	10.6119							5	A	CCR6		1			1		1				5			---	---	B-G	B-G	B-G	B-G	B-G	---	---	---	B--	B--	---			9.34285
1	CXCR2	A	CXCR2				11.389	11.4788	11.5176	11.7191	11.0614							5	A	CXCR2		1			1		1				5			---	---	B-G	B-G	B-G	B-G	B-G	---	---	---	B--	---	---			11.389
1	CXCR4	A	CXCR4				10.2842	10.6268	10.237	10.3242	9.9125							5	A	CXCR4		1			1		1				5			---	---	B-G	B-G	B-G	B-G	B-G	---	---	---	---	---	---			10.2842
1	CXCR5	A	CXCR5				9.73158	9.775	10.1878	10.431	10.4975							5	A	CXCR5		1			1		1				5			---	---	B-G	B-G	B-G	B-G	B-G	---	---	---	---	---	---			9.73158
1	DRD2	A	D2				9.89633	9.7163	9.9986	10.235	9.70322							5	A	D2		1			1		1				5			---	---	BIG	BIG	BIG	BIG	BIG	---	---	---	---	---	---			10.0237
1	DRD3	A	D3				8.92499	8.92499	9.02169	9.02169	9.6256							5	A	D3		1			1		1				5			---	---	-IG	-IG	-IG	-IG	-IG	---	---	---	---	---	---
1	DRD4	A	D4				9.22933	9.22933	9.21893	9.21893	9.45135							5	A	D4		1			1		1				5			---	---	-IG	-IG	-IG	-IG	-IG	---	---	---	---	---	---
1	GALR1	A	GAL1				9.94769	9.94769	9.51399	9.51399	8.98598							5	A	GAL1		1			1		1				5			-I-	-I-	-IG	-IG	-IG	-IG	-IG	-I-	-I-	-I-	-I-	-I-	-I-
1	GALR3	A	GAL3				7.48157	7.48157	7.71918	7.71918	7.78445							5	A	GAL3		1			1		1				5			---	---	-IG	-IG	-IG	-IG	-IG	---	---	---	---	---	---
1	GPR84	A	GPR84				5.28551	5.22318	4.75302	5.47581	5.6518							5	A	GPR84		1			1		1				5			---	---	BIG	BIG	BIG	-IG	BIG	---	---	---	---	---	---			5.33311
1	HCAR2	A	HCA2				8.94247	8.81851	8.92234	8.90822	8.84894							5	A	HCA2		1			1		1				5			---	---	B-G	B-G	B-G	B-G	B-G	---	---	---	---	---	B--			8.94247
1	HCAR3	A	HCA3				7.28716	7.158	7.20523	7.25512	6.95912							5	A	HCA3		1			1		1				5			---	---	B-G	B-G	B-G	B-G	B-G	---	---	---	---	---	B--			7.28716
1	HRH3	A	H3				8.77504	8.77504	8.10695	8.10695	7.50724							5	A	H3		1			1		1				5			---	---	-IG	-IG	-IG	-IG	-IG	---	---	-I-	---	-I-	---
1	MTR1B	A	MT2				11.3611	11.3385	10.7258	10.9441	11.7799							5	A	MT2		1			1		1				5			---	---	BIG	BIG	BIG	BIG	-IG	---	---	---	B--	---	---			10.8346
1	NPFF1	A	NPFF1				9.30485	9.29676	9.54961	9.79503	10.2693							5	A	NPFF1		1			1		1				5			---	---	BIG	BIG	BIG	BIG	BIG	---	---	---	B--	B--	B--			9.92441
1	NPFF2	A	NPFF2				9.10832	9.07644	9.43304	9.68894	9.96163							5	A	NPFF2		1			1		1				5			---	---	BIG	BIG	BIG	BIG	BIG	---	---	---	---	---	---			8.51193
1	NPY1R	A	Y1				10.9708	10.8615	10.6388	11.1726	11.6967							5	A	Y1		1			1		1				5			---	---	B-G	B-G	B-G	B-G	B-G	---	---	---	---	---	---			10.9708
1	NPY5R	A	Y5						9.32308	9.12962	8.78864							3	A	Y5		1			1		1				3			---	---	--G	--G	B-G	B-G	B-G	---	---	---	---	---	---
1	SSR1	A	SST1				10.9043	10.9043	10.166	10.166	9.59909							5	A	SST1		1			1		1				5			---	---	-IG	-IG	-IG	-IG	-IG	---	---	-I-	-I-	-I-	-I-
1	SSR3	A	SST3				10.169	10.169	9.21133	9.21133	8.92209							5	A	SST3		1			1		1				5			---	---	-IG	-IG	-IG	-IG	-IG	---	---	-I-	-I-	-I-	---
1	SSR4	A	SST4				10.8167	10.8167	10.0648	10.0648	9.70531							5	A	SST4		1			1		1				5			---	---	-IG	-IG	-IG	-IG	-IG	---	---	-I-	-I-	-I-	---
1	SSR5	A	SST5				11.4123	11.4123	11.1355	11.1355	11.0305							5	A	SST5		1			1		1				5			-I-	-I-	-IG	-IG	-IG	-IG	-IG	-I-	-I-	-I-	-I-	-I-	-I-
2	ACTHR	A	MC2																A	MC2	1				1	1								--G	--G	---	---	---	---	---	---	---	---	---	---	---
2	GP101	A	GPR101																A	GPR101	1				1	1								--G	--G	---	---	---	---	---	---	---	---	---	---	---
2	GPR26	A	GPR26																A	GPR26	1				1	1								--G	--G	---	---	---	---	---	---	---	---	---	---	---
2	GPR3	A	GPR3																A	GPR3	1				1	1								--G	--G	---	---	---	---	---	---	---	---	---	---	---
2	GPR78	A	GPR78																A	GPR78	1				1	1								--G	--G	---	---	---	---	---	---	---	---	---	---	---
2	MSHR	A	MC1																A	MC1	1				1	1								--G	--G	---	---	---	---	---	---	---	-I-	---	---	---
2	AGTR2	A	AT2																A	AT2		1			1		1							---	---	--G	--G	--G	--G	--G	---	---	---	---	---	---
2	CCR1	A	CCR1																A	CCR1		1			1		1							---	---	--G	--G	--G	--G	--G	---	---	---	---	---	---
2	CCR10	A	CCR10																A	CCR10		1			1		1							---	---	--G	--G	--G	--G	--G	---	---	---	---	---	---
2	CCR2	A	CCR2																A	CCR2		1			1		1							---	---	--G	--G	--G	--G	--G	---	---	---	---	---	---
2	CCR3	A	CCR3																A	CCR3		1			1		1							---	---	--G	--G	--G	--G	--G	---	---	---	---	---	---
2	CCR4	A	CCR4																A	CCR4		1			1		1							---	---	--G	--G	--G	--G	--G	---	---	---	---	---	---
2	CCR7	A	CCR7																A	CCR7		1			1		1							---	---	--G	--G	--G	--G	--G	---	---	---	---	---	---
2	CCR8	A	CCR8																A	CCR8		1			1		1							---	---	--G	--G	--G	--G	--G	---	---	---	---	---	---
2	CCR9	A	CCR9																A	CCR9		1			1		1							---	---	--G	--G	--G	--G	--G	---	---	---	---	---	---
2	CML1	A	Chemerin																A	Chemerin		1			1		1							---	---	--G	--G	--G	--G	--G	---	---	---	---	---	---
2	CX3C1	A	CX3CR1																A	CX3CR1		1			1		1							---	---	--G	--G	--G	--G	--G	---	---	---	---	---	---
2	CXCR3	A	CXCR3																A	CXCR3		1			1		1							---	---	--G	--G	--G	--G	--G	---	---	---	---	---	---
2	CXCR6	A	CXCR6																A	CXCR6		1			1		1							---	---	--G	--G	--G	--G	--G	---	---	---	---	---	---
2	FPR3	A	FPR3																A	FPR3		1			1		1							---	---	--G	--G	--G	--G	--G	---	---	---	---	---	---
2	G37L1	A	GPR37L1																A	GPR37L1		1			1		1							---	---	--G	--G	--G	--G	--G	---	---	---	---	---	---
2	GPR20	A	GPR20																A	GPR20		1			1		1							---	---	--G	--G	--G	--G	--G	---	---	---	---	---	---
2	GPR22	A	GPR22																A	GPR22		1			1		1							---	---	--G	--G	--G	--G	--G	---	---	---	---	---	---
2	GPR31	A	GPR31																A	GPR31		1			1		1							---	---	--G	--G	--G	--G	--G	---	---	---	---	---	---
2	GPR33	A	GPR33																A	GPR33		1			1		1							---	---	--G	--G	--G	--G	--G	---	---	---	---	---	---
2	GPR37	A	GPR37																A	GPR37		1			1		1							---	---	--G	--G	--G	--G	--G	---	---	---	---	---	---
2	HCAR1	A	HCA1																A	HCA1		1			1		1							---	---	--G	--G	--G	--G	--G	---	---	---	---	---	---
2	NPBW2	A	NPBW2																A	NPBW2		1			1		1							---	---	--G	--G	--G	--G	--G	---	---	---	---	---	---
2	OPN5	A	OPN5																A	OPN5		1			1		1							---	---	--G	--G	--G	--G	--G	---	---	---	---	---	---
2	OXER1	A	OXE																A	OXE		1			1		1							---	---	--G	--G	--G	--G	--G	---	---	---	---	---	---
2	PD2R2	A	DP2																A	DP2		1			1		1							---	---	--G	--G	--G	--G	--G	---	---	---	---	---	---
2	RL3R1	A	RXFP3																A	RXFP3		1			1		1							---	---	--G	--G	--G	--G	--G	---	---	---	---	---	---
2	RL3R2	A	RXFP4																A	RXFP4		1			1		1							---	---	--G	--G	--G	--G	--G	---	---	---	---	---	---
2	XCR1	A	XCR1																A	XCR1		1			1		1							---	---	--G	--G	--G	--G	--G	---	---	---	---	---	---
1	VIPR1	B1	VPAC1		13.1871		9.55126	9.71293	9.55227	10.2216	9.61049	10.0922	9.36484	8.58442	11.4817			10	B1	VPAC1	1	2	2		3	1	1	1		1	5	4		B-G	--G	B-G	B-G	B-G	B-G	B-G	B-G	B-G	B-G	B-G	B--	B--	13.1871		9.55126
1	CRFR2	B1	CRF2		12.2933									7.89097	10.6023			3	B1	CRF2	1		2		2	1		1		1		2		B-G	--G	B--	B--	B--	B--	B--	--G	--G	B-G	B-G	---	---	12.2933		9.87642
1	CRFR1	B1	CRF1		9.406										8.19883			2	B1	CRF1	1		2		2	1		1		1		1		B-G	--G	B--	B--	---	B--	B--	--G	--G	--G	B-G	B--	B--	9.406		8.23845
1	CALCR	B1	CT		13.7174							10.0809	9.4055	9.87792	12.386			5	B1	CT	1		2		2	1		1		1		4		B-G	--G	B--	B--	B--	B--	B--	B-G	B-G	B-G	B-G	B--	B--	13.7174		10.0076
1	PACR	B1	PAC1		10.3211	10.302						10.4139	10.4139	9.91592				5	B1	PAC1	1		1		2	1		1		2		3		-IG	-IG	-I-	-I-	-I-	-I-	-I-	-IG	-IG	-IG	--G	---	-I-
1	PTH1R	B1	PTH1		11.5945	10.0324						9.64472	9.28744	9.16952	11.0389			6	B1	PTH1	1		2		2	1		1		2		4		BIG	-IG	B--	B--	B--	B--	B--	BIG	BIG	BIG	B-G	B--	B--	12.9593		9.61234
1	CALCR+RAMP3	B1	AMY3		9.30016													1	B1	AMY3	1				1	1				1				B-G	--G	---	---	---	---	---	---	---	---	B--	B--	B--	9.30016
1	GLP2R	B1	GLP-2		12.0864													1	B1	GLP-2	1				1	1				1				B-G	--G	B--	B--	B--	B--	B--	---	---	---	B--	---	---	12.0864		9.75583
1	GLP1R	B1	GLP-1		12.5851													1	B1	GLP-1	1				1	1				1				B-G	--G	B--	B--	B--	B--	B--	---	---	---	B--	---	B--	12.5851		9.04104
1	GLR	B1	Glucagon		12.9514													1	B1	Glucagon	1				1	1				1				B-G	--G	B--	B--	B--	B--	B--	B--	B--	B--	B--	---	B--	12.9514		9.94069
1	GIPR	B1	GIP		11.3169	10.1378												2	B1	GIP	1				1	1				2				BIG	-IG	B--	B--	B--	B--	B--	---	---	---	B--	---	---	12.3911		10.1617
2	GHRHR	B1	GHRH																B1	GHRH	1				1	1								--G	--G	---	---	---	---	---	---	---	---	---	---	---
2	SCTR	B1	Secretin																B1	Secretin	1				1	1								--G	--G	---	---	---	---	---	---	---	---	---	---	---
2	VIPR2	B1	VPAC2																B1	VPAC2	1				1	1								--G	--G	---	---	---	---	---	---	---	---	---	---	---
2	AGRG1	B2	ADGRG1																B2	ADGRG1			1	1	2			1	1					---	---	---	---	---	---	---	--G	--G	--G	--G	--G	--G
2	AGRE5	B2	ADGRE5																B2	ADGRE5				1	1				1					---	---	---	---	---	---	---	---	---	---	---	--G	--G
2	AGRE2	B2	ADGRE2																B2	ADGRE2			1		1			1						---	---	---	---	---	---	---	--G	--G	--G	--G	---	---
2	AGRG2	B2	ADGRG2																B2	ADGRG2			2		1			1						---	---	---	---	---	---	---	--G	--G	--G	--G	---	---
2	AGRL1	B2	ADGRL1																B2	ADGRL1			1		1			1						---	---	---	---	---	---	---	--G	--G	--G	--G	---	---
2	AGRD1	B2	ADGRD1																B2	ADGRD1	1				1	1								--G	--G	---	---	---	---	---	---	---	---	---	---	---
2	AGRG3	B2	ADGRG3																B2	ADGRG3		1			1		1							---	---	--G	--G	--G	--G	--G	---	---	---	---	---	---
2	CASR	C	CaS																C	CaS		1	1	1	3		1	1	1					---	---	--G	--G	--G	--G	--G	--G	--G	--G	--G	--G	--G
1	GRM5	C	mGlu5				7.28785	7.13284	7.38685	7.17484	7.12401	7.68342	7.68653	6.93648	7.83095			9	C	mGlu5	2	2	1		3	1	1	1			5	4		--G	--G	B-G	B-G	B-G	B-G	B-G	B-G	B-G	B-G	B-G	---	---			7.28785
2	GRM1	C	mGlu1																C	mGlu1	2	2	1		3	1	1	1						--G	--G	--G	--G	--G	--G	--G	--G	--G	--G	--G	---	---
2	GPC6A	C	GPRC6																C	GPRC6			1		1			1						---	---	---	---	---	---	---	--G	--G	--G	--G	---	---
1	GRM4	C	mGlu4				5.58417		6.51121	6.29536								3	C	mGlu4		1			1		1				3			---	---	B-G	--G	B-G	B-G	--G	---	---	---	---	---	---			5.58417
1	GRM2	C	mGlu2				7.06891	6.72159	7.3621	7.3137	6.68997							5	C	mGlu2		1			1		1				5			---	---	B-G	B-G	B-G	B-G	B-G	---	---	---	B--	---	---			7.06891
1	GRM6	C	mGlu6				6.22897	5.9745	6.72729	6.76685	6.05686							5	C	mGlu6		1			1		1				5			---	---	B-G	B-G	B-G	B-G	B-G	---	---	---	---	---	---			6.22897
1	GRM8	C	mGlu8				7.26072	6.97515	7.34692	7.22691	7.064							5	C	mGlu8		1			1		1				5			---	---	B-G	B-G	B-G	B-G	B-G	---	---	---	---	---	---			7.26072
2	GRM3	C	mGlu3																C	mGlu3		1			1		1							---	---	--G	--G	--G	--G	--G	---	---	---	---	---	---
2	GRM7	C	mGlu7																C	mGlu7		1			1		1							---	---	--G	--G	--G	--G	--G	---	---	---	---	---	---
2	SMO	F	SMO																F	SMO		1		1	2		1		1					---	---	--G	--G	--G	--G	--G	---	---	---	---	--G	--G
2	FZD4	F	FZD4																F	FZD4				1	1				1					---	---	---	---	---	---	---	---	---	---	---	--G	--G
2	FZD10	F	FZD10																F	FZD10				2	1				1					---	---	---	---	---	---	---	---	---	---	---	--G	--G
2	FZD1	F	FZD1																F	FZD1		2	2		2		1	1						---	---	--G	--G	--G	--G	--G	--G	--G	--G	--G	---	---
2	FZD6	F	FZD6																F	FZD6		1	1		2		1	1						---	---	--G	--G	--G	--G	--G	--G	--G	--G	--G	---	---
2	FZD7	F	FZD7																F	FZD7	1	1			2	1	1							--G	--G	--G	--G	--G	--G	--G	---	---	---	---	---	---
2	FZD3	F	FZD3																F	FZD3	1				1	1								--G	--G	---	---	---	---	---	---	---	---	---	---	---
2	FZD2	F	FZD2																F	FZD2		1			1		1							---	---	--G	--G	--G	--G	--G	---	---	---	---	---	---
2	FZD9	F	FZD9																F	FZD9		1			1		1							---	---	--G	--G	--G	--G	--G	---	---	---	---	---	---
3	ACKR1	A	ACKR1																A	ACKR1					0									---	---	---	---	---	---	---	---	---	---	---	---	---
3	ACKR2	A	ACKR2																A	ACKR2					0									---	---	---	---	---	---	---	---	---	---	---	---	---
3	ACKR3	A	ACKR3																A	ACKR3					0									---	---	---	---	---	---	---	---	---	---	---	---	---
3	ACKR4	A	ACKR4																A	ACKR4					0									---	---	---	---	---	---	---	---	---	---	---	---	---
3	C3AR	A	C3a																A	C3a					0									---	---	---	---	---	---	---	---	---	---	---	---	---
3	C5AR2	A	C5a2																A	C5a2					0									---	---	---	---	---	---	---	---	---	---	---	---	---
3	CCRL2	A	CCRL2																A	CCRL2					0									---	---	---	---	---	---	---	---	---	---	---	---	---
3	GP132	A	GPR132																A	GPR132					0									-I-	-I-	---	---	---	---	---	-I-	-I-	---	---	---	---
3	GP135	A	GPR135																A	GPR135					0									---	---	---	---	---	---	---	---	---	---	---	---	---
3	GP141	A	GPR141																A	GPR141					0									---	---	---	---	---	---	---	---	---	---	---	---	---
3	GP142	A	GPR142																A	GPR142					0									---	---	---	---	---	---	---	---	---	---	---	---	---
3	GP146	A	GPR146																A	GPR146					0									---	---	---	---	---	---	---	---	---	---	---	---	---
3	GP148	A	GPR148																A	GPR148					0									---	---	---	---	---	---	---	---	---	---	---	---	---
3	GP149	A	GPR149																A	GPR149					0									---	---	---	---	---	---	---	---	---	---	---	---	---
3	GP150	A	GPR150																A	GPR150					0									---	---	---	---	---	---	---	---	---	---	---	---	---
3	GP151	A	GPR151																A	GPR151					0									---	---	---	---	---	---	---	---	---	---	---	---	---
3	GP152	A	GPR152																A	GPR152					0									---	---	---	---	---	---	---	---	---	---	---	---	---
3	GP153	A	GPR153																A	GPR153					0									---	---	---	---	---	---	---	---	---	---	---	---	---
3	GP160	A	GPR160																A	GPR160					0									---	---	---	---	---	---	---	---	---	---	---	---	---
3	GP161	A	GPR161																A	GPR161					0									---	---	---	---	---	---	---	---	---	---	---	---	---
3	GP162	A	GPR162																A	GPR162					0									---	---	---	---	---	---	---	---	---	---	---	---	---
3	GP171	A	GPR171																A	GPR171					0									---	---	---	---	---	---	---	---	---	---	---	---	---
3	GP173	A	GPR173																A	GPR173					0									---	---	---	---	---	---	---	---	---	---	---	---	---
3	GP174	A	GPR174																A	GPR174					0									-I-	-I-	---	---	---	---	---	---	---	---	---	---	-I-
3	GP176	A	GPR176																A	GPR176					0									---	---	---	---	---	---	---	---	---	---	---	---	---
3	GP182	A	GPR182																A	GPR182					0									---	---	---	---	---	---	---	---	---	---	---	---	---
3	GPR1	A	GPR1																A	GPR1					0									---	---	---	---	---	---	---	---	---	---	---	---	---
3	GPR15	A	GPR15																A	GPR15					0									---	---	---	---	---	---	---	---	---	---	---	---	---
3	GPR19	A	GPR19																A	GPR19					0									---	---	---	---	---	---	---	---	---	---	---	---	---
3	GPR21	A	GPR21																A	GPR21					0									---	---	---	---	---	---	---	---	---	---	---	---	---
3	GPR25	A	GPR25																A	GPR25					0									---	---	---	---	---	---	---	---	---	---	---	---	---
3	GPR32	A	GPR32																A	GPR32					0									---	---	---	---	---	---	---	---	---	---	---	---	---
3	GPR35	A	GPR35																A	GPR35					0									---	---	-I-	-I-	-I-	-I-	-I-	---	---	---	---	-I-	-I-
3	GPR42	A	GPR42																A	GPR42					0									---	---	---	---	---	---	---	---	---	---	---	---	---
3	GPR45	A	GPR45																A	GPR45					0									---	---	---	---	---	---	---	---	---	---	---	---	---
3	GPR52	A	GPR52																A	GPR52					0									---	---	---	---	---	---	---	---	---	---	---	---	---
3	GPR61	A	GPR61																A	GPR61					0									---	---	---	---	---	---	---	---	---	---	---	---	---
3	GPR62	A	GPR62																A	GPR62					0									---	---	---	---	---	---	---	---	---	---	---	---	---
3	GPR63	A	GPR63																A	GPR63					0									---	---	---	---	---	---	---	---	---	---	---	---	---
3	GPR82	A	GPR82																A	GPR82					0									---	---	---	---	---	---	---	---	---	---	---	---	---
3	GPR83	A	GPR83																A	GPR83					0									---	---	---	---	---	---	---	---	---	---	---	---	---
3	GPR85	A	GPR85																A	GPR85					0									---	---	---	---	---	---	---	---	---	---	---	---	---
3	GPR87	A	GPR87																A	GPR87					0									---	---	---	---	---	---	---	---	---	---	---	---	---
3	GPR88	A	GPR88																A	GPR88					0									---	---	---	---	---	---	---	---	---	---	---	---	---
3	LGR4	A	LGR4																A	LGR4					0									---	---	---	---	---	---	---	---	---	---	---	---	---
3	LGR5	A	LGR5																A	LGR5					0									---	---	---	---	---	---	---	---	---	---	---	---	---
3	LGR6	A	LGR6																A	LGR6					0									---	---	---	---	---	---	---	---	---	---	---	---	---
3	MAS1L	A	MAS1L																A	MAS1L					0									---	---	---	---	---	---	---	---	---	---	---	---	---
3	MRGRE	A	MRGPRE																A	MRGPRE					0									---	---	---	---	---	---	---	---	---	---	---	---	---
3	MRGRF	A	MRGPRF																A	MRGPRF					0									---	---	---	---	---	---	---	---	---	---	---	---	---
3	MRGRG	A	MRGPRG																A	MRGPRG					0									---	---	---	---	---	---	---	---	---	---	---	---	---
3	MTR1L	A	GPR50																A	GPR50					0									---	---	---	---	---	---	---	---	---	---	---	---	---
3	NPY6R	A	Y6																A	Y6					0									---	---	---	---	---	---	---	---	---	---	---	---	---
3	OPN3	A	OPN3																A	OPN3					0									---	---	---	---	---	---	---	---	---	---	---	---	---
3	OPSB	A	OPN1SW																A	OPN1SW					0									---	---	---	---	---	---	---	---	---	---	---	---	---
3	OPSD	A	Rhodopsin																A	Rhodopsin					0									---	---	---	---	---	---	---	---	---	---	---	---	---
3	OPSG	A	OPN1MW																A	OPN1MW					0									---	---	---	---	---	---	---	---	---	---	---	---	---
3	OPSR	A	OPN1LW																A	OPN1LW					0									---	---	---	---	---	---	---	---	---	---	---	---	---
3	P2RY8	A	P2RY8																A	P2RY8					0									---	---	---	---	---	---	---	---	---	---	---	---	---
3	P2Y10	A	P2RY10																A	P2RY10					0									---	---	-I-	-I-	-I-	-I-	-I-	---	---	-I-	---	-I-	-I-
3	P2Y12	A	P2Y12																A	P2Y12					0									---	---	---	---	-I-	-I-	-I-	-I-	-I-	-I-	---	-I-	-I-
3	PAR3	A	PAR3																A	PAR3					0									-I-	-I-	-I-	-I-	-I-	-I-	-I-	-I-	-I-	-I-	-I-	-I-	-I-
3	PAR4	A	PAR4																A	PAR4					0									-I-	-I-	-I-	-I-	-I-	-I-	-I-	-I-	-I-	-I-	-I-	-I-	-I-
3	PRLHR	A	PrRP																A	PrRP					0									---	---	-I-	-I-	-I-	-I-	---	-I-	-I-	-I-	---	---	-I-
3	TAAR2	A	TAAR2																A	TAAR2					0									---	---	---	---	---	---	---	---	---	---	---	---	---
3	TAAR3	A	TAAR3																A	TAAR3					0									---	---	---	---	---	---	---	---	---	---	---	---	---
3	TAAR5	A	TAAR5																A	TAAR5					0									---	---	---	---	---	---	---	---	---	---	---	---	---
3	TAAR6	A	TAAR6																A	TAAR6					0									---	---	---	---	---	---	---	---	---	---	---	---	---
3	TAAR8	A	TAAR8																A	TAAR8					0									---	---	---	---	---	---	---	---	---	---	---	---	---
3	TAAR9	A	TAAR9																A	TAAR9					0									---	---	---	---	---	---	---	---	---	---	---	---	---
3	CALRL	B1	Calcitonin receptor-like																B1	Calcitonin receptor-like					0									---	---	---	---	---	---	---	---	---	---	---	---	---
3	PTH2R	B1	PTH2																B1	PTH2					0									-I-	-I-	-I-	-I-	-I-	-I-	-I-	-I-	-I-	-I-	-I-	---	-I-
3	AGRA1	B2	ADGRA1																B2	ADGRA1					0									---	---	---	---	---	---	---	---	---	---	---	---	---
3	AGRA2	B2	ADGRA2																B2	ADGRA2					0									---	---	---	---	---	---	---	---	---	---	---	---	---
3	AGRA3	B2	ADGRA3																B2	ADGRA3					0									---	---	---	---	---	---	---	---	---	---	---	---	---
3	AGRB1	B2	ADGRB1																B2	ADGRB1					0									---	---	---	---	---	---	---	---	---	---	---	---	---
3	AGRB2	B2	ADGRB2																B2	ADGRB2					0									---	---	---	---	---	---	---	---	---	---	---	---	---
3	AGRB3	B2	ADGRB3																B2	ADGRB3					0									---	---	---	---	---	---	---	---	---	---	---	---	---
3	AGRD2	B2	ADGRD2																B2	ADGRD2					0									---	---	---	---	---	---	---	---	---	---	---	---	---
3	AGRE1	B2	ADGRE1																B2	ADGRE1					0									---	---	---	---	---	---	---	---	---	---	---	---	---
3	AGRE3	B2	ADGRE3																B2	ADGRE3					0									---	---	---	---	---	---	---	---	---	---	---	---	---
3	AGRE4	B2	ADGRE4P																B2	ADGRE4P					0									---	---	---	---	---	---	---	---	---	---	---	---	---
3	AGRF1	B2	ADGRF1																B2	ADGRF1					0									---	---	---	---	---	---	---	---	---	---	---	---	---
3	AGRF2	B2	ADGRF2																B2	ADGRF2					0									---	---	---	---	---	---	---	---	---	---	---	---	---
3	AGRF3	B2	ADGRF3																B2	ADGRF3					0									---	---	---	---	---	---	---	---	---	---	---	---	---
3	AGRF4	B2	ADGRF4																B2	ADGRF4					0									---	---	---	---	---	---	---	---	---	---	---	---	---
3	AGRF5	B2	ADGRF5																B2	ADGRF5					0									---	---	---	---	---	---	---	---	---	---	---	---	---
3	AGRG4	B2	ADGRG4																B2	ADGRG4					0									---	---	---	---	---	---	---	---	---	---	---	---	---
3	AGRG5	B2	ADGRG5																B2	ADGRG5					0									---	---	---	---	---	---	---	---	---	---	---	---	---
3	AGRG6	B2	ADGRG6																B2	ADGRG6					0									---	---	---	---	---	---	---	---	---	---	---	---	---
3	AGRG7	B2	ADGRG7																B2	ADGRG7					0									---	---	---	---	---	---	---	---	---	---	---	---	---
3	AGRL2	B2	ADGRL2																B2	ADGRL2					0									---	---	---	---	---	---	---	---	---	---	---	---	---
3	AGRL3	B2	ADGRL3																B2	ADGRL3					0									---	---	---	---	---	---	---	---	---	---	---	---	---
3	AGRL4	B2	ADGRL4																B2	ADGRL4					0									---	---	---	---	---	---	---	---	---	---	---	---	---
3	AGRV1	B2	ADGRV1																B2	ADGRV1					0									---	---	---	---	---	---	---	---	---	---	---	---	---
3	CELR1	B2	CELSR1																B2	CELSR1					0									---	---	---	---	---	---	---	---	---	---	---	---	---
3	CELR2	B2	CELSR2																B2	CELSR2					0									---	---	---	---	---	---	---	---	---	---	---	---	---
3	CELR3	B2	CELSR3																B2	CELSR3					0									---	---	---	---	---	---	---	---	---	---	---	---	---
3	GABR1	C	GABAB1																C	GABAB1					0									---	---	---	---	---	---	---	---	---	---	---	---	---
3	GABR2	C	GABAB2																C	GABAB2					0									---	---	---	---	---	---	---	---	---	---	---	---	---
3	GP156	C	GPR156																C	GPR156					0									---	---	---	---	---	---	---	---	---	---	---	---	---
3	GP158	C	GPR158																C	GPR158					0									---	---	---	---	---	---	---	---	---	---	---	---	---
3	GP179	C	GPR179																C	GPR179					0									---	---	---	---	---	---	---	---	---	---	---	---	---
3	GPC5B	C	GPRC5B																C	GPRC5B					0									---	---	---	---	---	---	---	---	---	---	---	---	---
3	GPC5C	C	GPRC5C																C	GPRC5C					0									---	---	---	---	---	---	---	---	---	---	---	---	---
3	GPC5D	C	GPRC5D																C	GPRC5D					0									---	---	---	---	---	---	---	---	---	---	---	---	---
3	RAI3	C	GPRC5A																C	GPRC5A					0									---	---	---	---	---	---	---	---	---	---	---	---	---
3	TS1R1	C	TAS1R1																C	TAS1R1					0									---	---	---	---	---	---	---	---	---	---	---	---	---
3	TS1R2	C	TAS1R2																C	TAS1R2					0									---	---	---	---	---	---	---	---	---	---	---	---	---
3	TS1R3	C	TAS1R3																C	TAS1R3					0									---	---	---	---	---	---	---	---	---	---	---	---	---
3	FZD5	F	FZD5																F	FZD5					0									---	---	---	---	---	---	---	---	---	---	---	---	---
3	FZD8	F	FZD8																F	FZD8					0									---	---	---	---	---	---	---	---	---	---	---	---	---
3	G137A	O	GPR137																O	GPR137					0									---	---	---	---	---	---	---	---	---	---	---	---	---
3	GP107	O	GPR107																O	GPR107					0									---	---	---	---	---	---	---	---	---	---	---	---	---
3	GP143	O	GPR143																O	GPR143					0									---	---	---	---	---	---	---	---	---	---	---	---	---
3	GP157	O	GPR157																O	GPR157					0									---	---	---	---	---	---	---	---	---	---	---	---	---
3	O51E1	O	0																O	0					0									---	---	---	---	---	---	---	---	---	---	---	---	---
3	TPRA1	O	TPRA1																O	TPRA1					0									---	---	---	---	---	---	---	---	---	---	---	---	---
3	T2R10	T	TAS2R10																T	TAS2R10					0									---	---	---	---	---	---	---	---	---	---	---	---	---
3	T2R13	T	TAS2R13																T	TAS2R13					0									---	---	---	---	---	---	---	---	---	---	---	---	---
3	T2R14	T	TAS2R14																T	TAS2R14					0									---	---	---	---	---	---	---	---	---	---	---	---	---
3	T2R16	T	TAS2R16																T	TAS2R16					0									---	---	---	---	---	---	---	---	---	---	---	---	---
3	T2R19	T	TAS2R19																T	TAS2R19					0									---	---	---	---	---	---	---	---	---	---	---	---	---
3	T2R20	T	TAS2R20																T	TAS2R20					0									---	---	---	---	---	---	---	---	---	---	---	---	---
3	T2R30	T	TAS2R30																T	TAS2R30					0									---	---	---	---	---	---	---	---	---	---	---	---	---
3	T2R31	T	TAS2R31																T	TAS2R31					0									---	---	---	---	---	---	---	---	---	---	---	---	---
3	T2R38	T	TAS2R38																T	TAS2R38					0									---	---	---	---	---	---	---	---	---	---	---	---	---
3	T2R39	T	TAS2R39																T	TAS2R39					0									---	---	---	---	---	---	---	---	---	---	---	---	---
3	T2R40	T	TAS2R40																T	TAS2R40					0									---	---	---	---	---	---	---	---	---	---	---	---	---
3	T2R41	T	TAS2R41																T	TAS2R41					0									---	---	---	---	---	---	---	---	---	---	---	---	---
3	T2R42	T	TAS2R42																T	TAS2R42					0									---	---	---	---	---	---	---	---	---	---	---	---	---
3	T2R43	T	TAS2R43																T	TAS2R43					0									---	---	---	---	---	---	---	---	---	---	---	---	---
3	T2R45	T	TAS2R45																T	TAS2R45					0									---	---	---	---	---	---	---	---	---	---	---	---	---
3	T2R46	T	TAS2R46																T	TAS2R46					0									---	---	---	---	---	---	---	---	---	---	---	---	---
3	T2R50	T	TAS2R50																T	TAS2R50					0									---	---	---	---	---	---	---	---	---	---	---	---	---
3	T2R60	T	TAS2R60																T	TAS2R60					0									---	---	---	---	---	---	---	---	---	---	---	---	---
3	TA2R1	T	TAS2R1																T	TAS2R1					0									---	---	---	---	---	---	---	---	---	---	---	---	---
3	TA2R3	T	TAS2R3																T	TAS2R3					0									---	---	---	---	---	---	---	---	---	---	---	---	---
3	TA2R4	T	TAS2R4																T	TAS2R4					0									---	---	---	---	---	---	---	---	---	---	---	---	---
3	TA2R5	T	TAS2R5																T	TAS2R5					0									---	---	---	---	---	---	---	---	---	---	---	---	---
3	TA2R7	T	TAS2R7																T	TAS2R7					0									---	---	---	---	---	---	---	---	---	---	---	---	---
3	TA2R8	T	TAS2R8																T	TAS2R8					0									---	---	---	---	---	---	---	---	---	---	---	---	---
3	TA2R9	T	TAS2R9																T	TAS2R9					0									---	---	---	---	---	---	---	---	---	---	---	---	---
[truncated: 37 more columns]

## Sheet: Fig_3
#	Rec UniProt		Class	Receptor	Gs	Golf	Gi1	Gi2	GoA	GoB	Gz	Gq	G11	G14	G15	G12	G13			Class	Receptor	Gs	Gi/o	Gq/11	G12/13		# Fam	# Gs	# Gi/o	# Gq /11	# G12 /13	Gs	Golf	Gi1	Gi2	GoA	GoB	Gz	Gq	G11	G14	G15	G12	G13	B-Gs-Log EmEC	B-Golf-Log EmEC	B-Gi1-Log EmEC	B-Gi2-Log EmEC	B-GoA-Log EmEC
1	5HT1A		A	5-HT1A			8.81994	8.59294	9.29138	9.37007	9.05238			8.06687	8.05111					A	5-HT1A	0	1	0	0		2		5	2		-I-	-I-	BIG	BIG	BIG	BIG	BIG	-I-	-I-	BI-	BI-	-I-	-I-			9.61955	9.16555	10.3829
1	5HT1B		A	5-HT1B			9.81592	9.84881	9.7712	9.79616	9.71579									A	5-HT1B	0	1	0	0		1		5			---	---	BIG	BIG	BIG	BIG	BIG	-I-	-I-	-I-	B--	-I-	---			10.64	10.7058	10.9433
1	5HT1D		A	5-HT1D			10.4411	10.5021	10.3713	10.2995	8.16912									A	5-HT1D	0	1	0	0		1		5			---	---	BIG	BIG	BIG	BIG	BIG	-I-	-I-	-I-	---	---	---			10.6096	10.7316	10.5047
1	5HT1E		A	5-HT1E			8.63328	8.63328	8.71033	8.71033	8.52836									A	5-HT1E	0	1	0	0		1		5			---	---	-IG	-IG	-IG	-IG	-IG	---	---	---	---	---	---
1	5HT1F		A	5-HT1F			8.45964	8.45964												A	5-HT1F	0	1	0	0		1		2			---	---	-IG	-IG	--G	--G	--G	---	---	---	---	---	---
1	5HT2A		A	5-HT2A			8.4746	8.33936	8.14591	8.26238	9.28059	10.0278	10.0478	10.2605	9.31788					A	5-HT2A	0	2	1	0		2		5	4		-I-	-I-	BIG	BIG	BIG	BIG	BIG	BIG	BIG	BIG	BIG	-I-	-I-			7.85471	7.58424	7.75942
1	5HT2B		A	5-HT2B						8.86476	10.0211	9.94206	9.89821	9.76348	8.71952					A	5-HT2B	0	0	1	0		2		2	4		-I-	---	-I-	-I-	-I-	BI-	BI-	BIG	BIG	BIG	BIG	---	-I-
1	5HT2C		A	5-HT2C			9.39193	9.37427	9.55054	9.743	10.6431	9.67675	9.67675	9.85485	10.1464	9.72865	9.3398			A	5-HT2C	0	2	1	0		3		5	4	2	-I-	-I-	BIG	BIG	BIG	BIG	BIG	-IG	-IG	-IG	BIG	BI-	BI-			8.88402	8.8487	9.15433
1	5HT4R		A	5-HT4	8.63001	8.54843										8.25764	8.22116			A	5-HT4	1	0	0	2		2	2			2	-IG	-IG	-I-	-I-	-I-	-I-	-I-	-I-	-I-	-I-	-I-	-IG	-IG
1	5HT6R		A	5-HT6	8.40851	8.36397														A	5-HT6	1	0	2	0		2	2				-IG	-IG	---	---	---	---	-I-	--G	--G	--G	--G	---	-I-
1	5HT7R		A	5-HT7	10.2832	10.2947														A	5-HT7	1	0	0	0		1	2				-IG	-IG	-I-	-I-	-I-	-I-	-I-	-I-	-I-	-I-	-I-	-I-	-I-
1	AA1R		A	A1	6.72794	6.54861			8.84087	8.76494	8.61571	7.32431	7.32431	7.76382	8.26971	7.51368				A	A1	2	1	2	0		4	2	3	4	1	-IG	-IG	--G	--G	BIG	BIG	BIG	-IG	-IG	-IG	BIG	BI-	---					8.5978
1	AA2AR		A	A2A	7.79012	7.78301						7.65373	7.65373	7.79782	7.62422					A	A2A	1	0	2	0		2	2		4		BIG	-IG	-I-	-I-	-I-	-I-	-I-	-IG	-IG	-IG	B-G	B--	B--	7.82972
1	AA2BR		A	A2B	7.79805	7.30777						7.02465	7.02465	7.65939	8.01331					A	A2B	1	0	2	0		2	2		4		BIG	-IG	-I-	-I-	-I-	-I-	-I-	-IG	-IG	-IG	B-G	-I-	-I-	8.02387
1	AA3R		A	A3			8.51433	8.50854	7.24504	7.54764	6.44115									A	A3	0	1	0	0		1		5			---	---	BIG	BIG	BIG	BIG	-IG	---	---	---	B--	---	---			8.6394	8.62781	7.4272
1	APJ		A	APLNR			10.4386	10.4443	9.78793	9.84271	9.33196					8.5756				A	APLNR	0	1	0	0		2		5		1	---	---	BIG	BIG	BIG	BIG	BIG	-I-	-I-	---	B--	BI-	B--			11.2801	11.2914	11.0751
1	AGTR1		A	AT1			10.3763	10.42	10.1019	9.92769	9.4452	11.5893	11.6834	11.2439	11.2873	11.1811	10.8475			A	AT1	0	1	1	0		3		5	4	2	-I-	-I-	BIG	BIG	BIG	BIG	BIG	BIG	BIG	BIG	BIG	BI-	BI-			8.86616	8.95357	9.50386
1	BKRB1		A	B1			8.74989	8.79025	8.92254	9.04464	8.42275	8.26357	8.17995	8.95049	9.08834					A	B1	0	1	1	0		2		5	4		-I-	-I-	BIG	BIG	BIG	BIG	BIG	B-G	B-G	BIG	BIG	-I-	-I-			7.65442	7.73513	8.04355
1	BKRB2		A	B2	10.2344	9.92084	10.839	10.6333	10.4173	10.6989	10.5029	11.8605	11.8189	11.8147	11.339	11.606	11.2132			A	B2	1	1	1	0		4	2	5	4	2	-IG	-IG	BIG	BIG	BIG	BIG	BIG	BIG	BIG	BIG	BIG	BI-	BI-			9.85723	9.44583	9.43535
1	NMBR		A	BB1								12.7357	12.7357	12.5862	10.1273					A	BB1	0	0	1	0		1			4		-I-	-I-	-I-	-I-	-I-	-I-	-I-	-IG	-IG	-IG	-IG	-I-	-I-
1	GRPR		A	BB2								12.2545	12.2545	12.1003	10.6725					A	BB2	0	0	1	0		1			4		-I-	-I-	-I-	-I-	-I-	-I-	-I-	-IG	-IG	-IG	-IG	-I-	-I-
1	LT4R1		A	BLT1			11.134	11.2103	10.8894	11.0954	10.6471	8.8492	8.53464	9.3365	10.6264	10.5443	10.0985			A	BLT1	0	1	1	0		3		5	4	2	-I-	-I-	BIG	BIG	BIG	BIG	BIG	BIG	BIG	BIG	BIG	BI-	BI-			11.969	12.1217	11.9286
1	LT4R2		A	BLT2			9.70282	9.68711	8.36311	8.508	8.82551	7.96457	7.96457	7.60472						A	BLT2	0	1	2	0		2		5	3		---	---	BIG	BIG	BIG	BIG	B-G	-IG	-IG	-IG	--G	-I-	---			10.405	10.3735	10.1505
1	C5AR1		A	C5a1			11.0753	11.297	10.8975	11.3486	10.5692				11.2606					A	C5a1	0	1	2	0		2		5	1		---	---	B-G	B-G	B-G	B-G	B-G	--G	--G	--G	B-G	---	---			11.0753	11.297	10.8975
1	CNR1		A	CB1			9.39236	9.20183	9.52132	9.54336	9.41935			7.12694		9.42892	8.84849			A	CB1	2	1	0	0		4		5	1	2	--G	--G	BIG	BIG	BIG	BIG	B-G	---	---	BI-	B--	BI-	BI-			9.56899	9.18794	9.76129
1	CNR2		A	CB2			10.2734	10.2502	9.95714	10.1745	9.94439									A	CB2	2	1	0	0		2		5			--G	--G	BIG	BIG	BIG	BIG	BIG	---	---	---	B--	---	---			10.8908	10.8445	10.4869
1	CCKAR		A	CCK1	11.2592	12.43	11.6403	11.6061	11.5751	11.4725	11.0227	12.1655	12.256	12.4293	11.5449	12.4488	11.6021			A	CCK1	2	0	1	0		4	2	5	4	2	BIG	-IG	BI-	BI-	BI-	BI-	BI-	BIG	BIG	BIG	BIG	BI-	BI-	10.0784		10.4305	10.3621	10.9303
1	GASR		A	CCK2								12.3315	12.3315	12.4288	11.4455					A	CCK2	0	0	1	0		1			4		-I-	-I-	-I-	-I-	-I-	-I-	-I-	-IG	-IG	-IG	-IG	-I-	-I-
1	CCR5		A	CCR5			10.8917	10.8692	10.9343	11.1085	11.5283									A	CCR5	0	1	0	0		1		5			---	---	B-G	B-G	B-G	B-G	B-G	---	---	---	B--	---	---			10.8917	10.8692	10.9343
1	CCR6		A	CCR6			9.34285	10.1929	9.5309	10.1105	10.6119									A	CCR6	0	1	0	0		1		5			---	---	B-G	B-G	B-G	B-G	B-G	---	---	---	B--	B--	---			9.34285	10.1929	9.5309
1	CXCR2		A	CXCR2			11.389	11.4788	11.5176	11.7191	11.0614									A	CXCR2	0	1	0	0		1		5			---	---	B-G	B-G	B-G	B-G	B-G	---	---	---	B--	---	---			11.389	11.4788	11.5176
1	CXCR4		A	CXCR4			10.2842	10.6268	10.237	10.3242	9.9125									A	CXCR4	0	1	0	0		1		5			---	---	B-G	B-G	B-G	B-G	B-G	---	---	---	---	---	---			10.2842	10.6268	10.237
1	CXCR5		A	CXCR5			9.73158	9.775	10.1878	10.431	10.4975									A	CXCR5	0	1	0	0		1		5			---	---	B-G	B-G	B-G	B-G	B-G	---	---	---	---	---	---			9.73158	9.775	10.1878
1	CLTR1		A	CysLT1			10.2349	10.2806	9.97695	10.1611	10.1865	10.2311	10.1466	9.91337	9.95348					A	CysLT1	0	2	1	0		2		5	4		-I-	-I-	BIG	BIG	BIG	BIG	BIG	BIG	BIG	BIG	BIG	-I-	---			10.1592	10.2507	10.0292
1	CLTR2		A	CysLT2			8.95881	8.88688	9.04137	9.3033	10.4142	10.5667	10.483	10.6112	9.98506	9.90591	9.08685			A	CysLT2	0	2	1	0		3		5	4	2	---	---	BIG	BIG	BIG	BIG	BIG	BIG	BIG	BIG	BIG	BI-	BI-			8.89067	8.74681	9.19888
1	DRD1		A	D1	8.95895	7.14746					7.45193									A	D1	1	0	0	0		2	2	1			BIG	-IG	---	---	---	B--	BI-	-I-	-I-	-I-	B--	---	---	10.6235
1	DRD2		A	D2			9.89633	9.7163	9.9986	10.235	9.70322									A	D2	0	1	0	0		1		5			---	---	BIG	BIG	BIG	BIG	BIG	---	---	---	---	---	---			10.0237	9.66365	10.4301
1	DRD3		A	D3			8.92499	8.92499	9.02169	9.02169	9.6256									A	D3	0	1	0	0		1		5			---	---	-IG	-IG	-IG	-IG	-IG	---	---	---	---	---	---
1	DRD4		A	D4			9.22933	9.22933	9.21893	9.21893	9.45135									A	D4	0	1	0	0		1		5			---	---	-IG	-IG	-IG	-IG	-IG	---	---	---	---	---	---
1	DRD5		A	D5	9.33228	8.16455	7.4148	7.23784		7.96864										A	D5	1	0	0	0		2	2	3			BIG	-IG	BI-	BI-	-I-	BI-	-I-	-I-	-I-	-I-	B--	---	---	10.4422		7.09861	6.74469
1	PD2R		A	DP1	9.64646	9.49671														A	DP1	1	0	0	0		1	2				-IG	-IG	---	---	---	---	---	-I-	-I-	-I-	---	-I-	-I-
1	PE2R1		A	EP1			8.46111	8.86109	9.11075	8.80701		10.3299	10.3446	9.82263	10.1522	10.7934	9.3763			A	EP1	0	2	1	0		3		4	4	2	-I-	-I-	BIG	BIG	BIG	BIG	--G	BIG	BIG	BIG	BIG	BI-	BI-			7.2119	8.01186	9.06474
1	PE2R2		A	EP2	10.5526	9.27032														A	EP2	1	0	0	0		1	2				BIG	-IG	---	---	---	---	B--	---	---	---	B--	B--	---	11.3086
1	PE2R3		A	EP3			11.4735	11.3809	11.502	11.4249	11.6015	9.79629	9.79629	9.0193	9.47454		10.4075			A	EP3	0	1	2	0		3		5	4	1	-I-	-I-	BIG	BIG	BIG	BIG	BIG	-IG	-IG	BIG	BIG	-I-	BI-			11.4363	11.2512	11.5437
1	PE2R4		A	EP4	11.702	10.8361	10.7724	10.5418		9.30974	9.66301									A	EP4	1	2	0	0		2	2	4			BIG	-IG	BIG	BIG	--G	B-G	B-G	---	---	---	B--	B--	B--	12.4682		10.903	10.4417
1	EDNRA		A	ETA	10.9533		11.8622	11.8983	11.8058	11.8838	12.314	11.9771	11.9353	12.0781	10.9988	12.7448	11.735			A	ETA	0	0	1	0		4	1	5	4	2	BI-	-I-	BI-	BI-	BI-	BI-	BI-	BIG	BIG	BIG	BIG	BI-	BI-	10.121		11.3302	11.4024	11.76
1	EDNRB		A	ETB	11.5602	11.4924	12.4739	12.4739	11.9293	11.9293	12.0607	11.6852	11.6852	12.0673	12.0793					A	ETB	1	1	1	0		3	2	5	4		-IG	-IG	-IG	-IG	-IG	-IG	-IG	-IG	-IG	-IG	-IG	-I-	-I-
1	FFAR1		A	FFA1	6.56254	6.58379			6.61557	6.61557	6.08122				5.76272					A	FFA1	2	2	1	0		3	2	3	1		-IG	-IG	--G	--G	-IG	-IG	-IG	--G	--G	--G	-IG	-I-	-I-
1	FFAR2		A	FFA2			6.27838	6.21389	5.68527	5.68527	4.83218	6.03059	6.0691	6.12732	6.11231					A	FFA2	0	2	1	0		2		5	4		-I-	-I-	B-G	B-G	-IG	-IG	-IG	BIG	BIG	B-G	-IG	---	-I-			6.27838	6.21389
1	FFAR3		A	FFA3			6.52919	6.63888	6.52134	6.52261	6.24457					6.3441	5.82371			A	FFA3	0	1	0	0		2		5		2	---	---	BIG	BIG	BIG	BIG	BIG	---	---	-I-	-I-	BI-	BI-			6.84875	7.06814	7.2401
1	FFAR4		A	FFA4			8.13442	8.20573	8.03914	8.14858		7.78768	7.83066	8.1237	7.62851		7.41423			A	FFA4	0	0	1	0		3		4	4	1	-I-	-I-	BI-	BI-	BI-	BI-	-I-	BIG	BIG	BIG	BIG	-I-	BI-			6.70049	6.84311	6.83377
1	PF2R		A	FP	10.7958	10.6792			8.5739	8.61278	8.87562	10.6132	10.6389	10.2865	9.94858	9.73904	10.0366			A	FP	2	0	1	0		4	2	3	4	2	-IG	-IG	-I-	-I-	BI-	BI-	BI-	BIG	BIG	BIG	BIG	BI-	BI-					8.27796
1	FPR1		A	FPR1			8.29384	8.29384												A	FPR1	0	1	0	0		1		2			---	---	-IG	-IG	--G	--G	--G	---	---	-I-	---	---	---
1	FPR2		A	FPR2/ALX			8.32387	8.32387	8.07992	8.07992	8.13666	7.95589	7.95589	9.37695	7.0882					A	FPR2/ALX	0	1	2	0		2		5	4		---	---	-IG	-IG	-IG	-IG	-IG	-IG	-IG	-IG	-IG	-I-	-I-
1	GALR1		A	GAL1			9.94769	9.94769	9.51399	9.51399	8.98598									A	GAL1	0	1	0	0		1		5			-I-	-I-	-IG	-IG	-IG	-IG	-IG	-I-	-I-	-I-	-I-	-I-	-I-
1	GALR2		A	GAL2			9.56297	9.56297	9.40074	9.40074		10.4521	10.4521	10.1453	9.56946	10.0876	9.62769			A	GAL2	0	2	1	2		3		4	4	2	---	---	-IG	-IG	-IG	-IG	--G	-IG	-IG	-IG	-IG	-IG	-IG
1	GALR3		A	GAL3			7.48157	7.48157	7.71918	7.71918	7.78445									A	GAL3	0	1	0	0		1		5			---	---	-IG	-IG	-IG	-IG	-IG	---	---	---	---	---	---
1	GHSR		A	Ghrelin			10.5635	10.5011	11.0015	11.0692	11.1366	10.9929	10.9139	11.1626	11.0325	11.9036	11.0418			A	Ghrelin	0	2	1	2		3		5	4	2	-I-	-I-	BIG	BIG	BIG	BIG	BIG	BIG	BIG	BIG	BIG	BIG	BIG			9.91826	9.7935	10.2967
1	GNRHR		A	GnRH1			10.4607	10.4607	10.0514	10.0514	10.4926	11.2417	11.1958	10.7664	10.3336					A	GnRH1	0	2	1	0		2		5	4		-I-	-I-	-IG	-IG	-IG	-IG	-IG	BIG	BIG	BIG	B-G	---	---
1	GPBAR		A	GPBA	7.914															A	GPBA	1	0	0	0		1	1				B-G	--G	---	---	---	---	---	---	---	---	---	---	---	7.914
1	GP119		A	GPR119	9.79107	9.60925														A	GPR119	1	0	0	0		1	2				-IG	-IG	-I-	-I-	-I-	-I-	-I-	-I-	-I-	-I-	-I-	-I-	-I-
1	GPR17		A	GPR17			9.09066	9.09066	8.30543	8.30543	7.15522	8.89523	8.89523	7.78761						A	GPR17	0	1	2	0		2		5	3		---	---	-IG	-IG	-IG	-IG	-IG	-IG	-IG	-IG	--G	-I-	-I-
1	GP183		A	GPR183			10.4414	10.5266	10.4008	10.6629	10.0663					9.91838				A	GPR183	0	1	0	0		2		5		1	---	---	BIG	BIG	BIG	BIG	BIG	---	---	---	B--	BI-	---			10.9059	11.0763	10.808
1	GPR34		A	GPR34			8.24684	8.24684	8.01385	8.01385										A	GPR34	0	1	0	0		1		4			---	---	-IG	-IG	-IG	-IG	--G	---	---	---	---	---	---
1	GPR39		A	GPR39								5.65504	5.41815	5.6115	4.9276		6.62053			A	GPR39	2	0	1	2		3			4	1	--G	--G	B--	B--	B--	B--	---	B-G	B-G	B-G	B-G	--G	B-G			5.53646	5.26635	5.72323
1	GPR4		A	GPR4	9.74377		6.25536	6.31107				8.03571	7.92905	7.0806	7.60698					A	GPR4	1	1	1	1		4	1	2	4		B-G	--G	B-G	B-G	--G	--G	--G	B-G	B-G	B-G	B-G	--G	--G	9.74377		6.25536	6.31107
1	GPR55		A	GPR55													8.61485			A	GPR55	0	0	1	1		2				1	---	---	---	---	---	---	---	--G	--G	--G	--G	--G	-IG
1	PSYR		A	GPR65	8.69216															A	GPR65	1	0	0	0		1	1				B-G	--G	---	---	---	B--	---	---	---	---	---	---	B--	8.69216
1	OGR1		A	GPR68			8.36272	8.45471	9.0736	9.34686		9.401	9.346	9.1731	8.11456					A	GPR68	0	1	1	0		2		4	4		B--	---	B-G	B-G	B-G	B-G	--G	B-G	B-G	B-G	B-G	B--	B--	8.34501		8.36272	8.45471	9.0736
1	GPR84		A	GPR84			5.28551	5.22318	4.75302	5.47581	5.6518									A	GPR84	0	1	0	0		1		5			---	---	BIG	BIG	BIG	-IG	BIG	---	---	---	---	---	---			5.33311	5.20846	4.03023
1	HRH1		A	H1	8.29726		9.02797	8.92914	8.74124	8.74357	9.30629	9.58332	9.65835	9.54302	9.62079	8.39695	7.51076			A	H1	0	0	1	0		4	1	5	4	2	BI-	-I-	BI-	BI-	BI-	BI-	BI-	BIG	BIG	BIG	BIG	BI-	BI-	7.50989		8.407	8.20933	8.35506
1	HRH2		A	H2	8.36127	7.56367			6.81365	6.76498	6.33978				8.50324					A	H2	2	0	1	0		3	2	3	1		BIG	-IG	---	---	BI-	BI-	BI-	--G	--G	--G	B-G	B--	B--	9.0082				6.42639
1	HRH3		A	H3			8.77504	8.77504	8.10695	8.10695	7.50724									A	H3	0	1	0	0		1		5			---	---	-IG	-IG	-IG	-IG	-IG	---	---	-I-	---	-I-	---
1	HRH4		A	H4			9.05079	9.05079	7.90687	7.90687										A	H4	0	1	0	0		1		4			---	---	-IG	-IG	-IG	-IG	--G	---	---	---	-I-	---	---
1	HCAR2		A	HCA2			8.94247	8.81851	8.92234	8.90822	8.84894									A	HCA2	0	1	0	0		1		5			---	---	B-G	B-G	B-G	B-G	B-G	---	---	---	---	---	B--			8.94247	8.81851	8.92234
1	HCAR3		A	HCA3			7.28716	7.158	7.20523	7.25512	6.95912									A	HCA3	0	1	0	0		1		5			---	---	B-G	B-G	B-G	B-G	B-G	---	---	---	---	---	B--			7.28716	7.158	7.20523
1	PI2R		A	IP	11.1228	10.8786						10.3348	10.3348							A	IP	1	2	2	0		3	2		2		-IG	-IG	--G	--G	--G	--G	--G	-IG	-IG	--G	--G	-I-	---
1	KISSR		A	Kisspeptin								11.198	11.198	11.1502	8.49701					A	Kisspeptin	0	0	1	0		1			4		-I-	-I-	-I-	-I-	-I-	-I-	-I-	-IG	-IG	-IG	-IG	-I-	-I-
1	LPAR1		A	LPA1			9.92016	9.49457	9.79036	9.23938		8.79156	8.48969	8.1944	8.72137	9.38778	9.70669			A	LPA1	0	1	1	1		3		4	4	2	---	---	BIG	-IG	BIG	-IG	--G	BIG	BIG	BIG	BIG	-IG	BIG			10.3457		10.3414
1	LPAR2		A	LPA2			9.74104	9.84874	9.82857	10.1514	9.61825	9.37923	9.30527	9.21792	8.96029	9.86263	9.9212			A	LPA2	0	1	1	1		3		5	4	2	-I-	-I-	BIG	BIG	BIG	BIG	B-G	BIG	BIG	BIG	BIG	-IG	BIG			9.96248	10.1779	10.0802
1	LPAR3		A	LPA3			8.50482	8.50482	8.68742	8.68742	8.92402	8.31169	8.31169	8.4472	8.17192					A	LPA3	0	1	1	0		2		5	4		-I-	-I-	-IG	-IG	-IG	-IG	-IG	-IG	-IG	-IG	-IG	-I-	-I-
1	LPAR4		A	LPA4	8.72669	8.65594	8.53993	8.53993	8.61214	8.61214	8.5963	8.09774	8.09774	8.35086	8.35554		8.58863			A	LPA4	1	1	1	1		4	2	5	4	1	-IG	-IG	-IG	-IG	-IG	-IG	-IG	-IG	-IG	-IG	-IG	--G	-IG
1	LPAR6		A	LPA6	7.50461	7.17191	8.3816	8.3816	8.51383	8.51383	8.18934					8.69841	8.7161			A	LPA6	1	1	0	1		3	2	5		2	-IG	-IG	-IG	-IG	-IG	-IG	-IG	-I-	-I-	-I-	-I-	-IG	-IG
1	ACM1		A	M1	8.15819		8.06524	7.95694	7.7026	7.82946	8.30117	9.756	9.84456	9.68943	9.01681					A	M1	0	0	1	0		3	1	5	4		BI-	-I-	BI-	BI-	BI-	BI-	BI-	BIG	BIG	BIG	BIG	-I-	-I-	7.83099		6.92933	6.71274	6.78966
1	ACM2		A	M2	7.26632	6.7976	9.75839	9.64453	9.81065	10.0284	9.38394	8.0595	8.0595	7.28042	8.26674					A	M2	2	1	2	0		3	2	5	4		BIG	-IG	BIG	BIG	BIG	BIG	BIG	-IG	-IG	BIG	BIG	-I-	-I-	7.60684		9.92879	9.70107	10.4508
1	ACM3		A	M3			8.71742	8.5345	8.3867	8.40795	8.55037	9.83495	9.94412	9.84077	9.6057					A	M3	0	0	1	0		2		5	4		-I-	-I-	BI-	BI-	BI-	BI-	BI-	BIG	BIG	BIG	BIG	-I-	-I-			7.43284	7.06701	7.431
1	ACM4		A	M4			9.85947	9.97655	9.89777	10.1864	9.51911	7.50428		7.66342	8.22792					A	M4	0	1	0	0		2		5	3		-I-	---	BIG	BIG	BIG	BIG	BIG	BI-	-I-	BI-	BI-	-I-	-I-			10.1147	10.3488	10.4343
1	ACM5		A	M5								10.4381	10.4381	10.393	10.0255					A	M5	0	0	1	0		1			4		-I-	-I-	-I-	-I-	-I-	-I-	-I-	-IG	-IG	-IG	-IG	-I-	-I-
1	MC3R		A	MC3	10.3079						10.1563									A	MC3	1	0	0	0		2	1	1			BIG	--G	---	---	---	B--	BI-	---	---	-I-	B--	B--	B--	11.5051
1	MC4R		A	MC4	9.32038	8.97719					8.61492									A	MC4	1	0	0	0		2	2	1			BIG	-IG	-I-	-I-	-I-	-I-	BI-	-I-	-I-	-I-	B--	---	B--	9.94154
1	MC5R		A	MC5		7.06876														A	MC5	1	0	0	0		1	1				--G	-IG	-I-	-I-	-I-	-I-	-I-	-I-	-I-	-I-	-I-	---	---
1	MCHR1		A	MCH1	9.6005	9.61464	10.0797	10.0797	9.79546	9.79546	8.85935	10.51	10.51	9.10021	7.97558					A	MCH1	1	1	1	0		3	2	5	4		-IG	-IG	-IG	-IG	-IG	-IG	-IG	-IG	-IG	-IG	-IG	-I-	-I-
1	MCHR2		A	MCH2								10.6988	10.6988	9.99586	9.8167					A	MCH2	0	0	1	0		1			4		-I-	-I-	-I-	-I-	-I-	-I-	-I-	-IG	-IG	-IG	-IG	-I-	-I-
1	MTLR		A	motilin								11.9986	11.9986	11.4759	10.331	11.0923	10.8285			A	motilin	0	0	1	1		2			4	2	-I-	-I-	-I-	-I-	-I-	-I-	-I-	-IG	-IG	-IG	-IG	-IG	-IG
1	MRGX1		A	MRGPRX1								8.61519	8.61519	8.36855	8.53133					A	MRGPRX1	0	0	1	0		1			4		-I-	-I-	-I-	-I-	-I-	-I-	-I-	-IG	-IG	-IG	-IG	-I-	-I-
1	MRGX2		A	MRGPRX2			8.93497	8.93497	8.84062	8.84062	8.64749	8.86407	8.86407	8.93484	8.36135					A	MRGPRX2	0	1	1	0		2		5	4		-I-	-I-	-IG	-IG	-IG	-IG	-IG	-IG	-IG	-IG	-IG	-I-	-I-
1	MTR1A		A	MT1			12.0947	12.1169	12.0528	12.0616	12.3344				11.0166					A	MT1	0	1	2	0		2		5	1		---	---	BIG	BIG	BIG	BIG	-IG	--G	--G	--G	B-G	---	---			12.1089	12.1534	12.293
1	MTR1B		A	MT2			11.3611	11.3385	10.7258	10.9441	11.7799									A	MT2	0	1	0	0		1		5			---	---	BIG	BIG	BIG	BIG	-IG	---	---	---	B--	---	---			10.8346	10.7894	10.4216
1	NK1R		A	NK1	11.25	11.2205						11.8034	11.8034	11.9002	10.7388					A	NK1	1	0	1	0		2	2		4		-IG	-IG	-I-	-I-	-I-	-I-	-I-	-IG	-IG	-IG	-IG	-I-	-I-
1	NK2R		A	NK2	10.35	10.3742						11.8217	11.8217	11.8488	10.2405					A	NK2	1	0	1	0		2	2		4		-IG	-IG	-I-	-I-	-I-	-I-	-I-	-IG	-IG	-IG	-IG	-I-	-I-
1	NK3R		A	NK3								10.4651	10.4651	10.5343	9.18483					A	NK3	0	0	1	0		1			4		-I-	-I-	-I-	-I-	-I-	-I-	-I-	-IG	-IG	-IG	-IG	-I-	-I-
1	NMUR1		A	NMU1								10.93	10.93	10.8079	8.46384					A	NMU1	0	0	1	0		1			4		-I-	-I-	-I-	-I-	-I-	-I-	---	-IG	-IG	-IG	-IG	-I-	-I-
1	NMUR2		A	NMU2								11.1738	11.1738	11.134	10.949					A	NMU2	0	0	1	0		1			4		-I-	-I-	-I-	-I-	-I-	-I-	-I-	-IG	-IG	-IG	-IG	-I-	-I-
1	OPRX		A	NOP			11.5291	11.3499	11.4384	11.6631	12.1475			10.1719	10.0195					A	NOP	0	1	0	0		2		5	2		---	---	BIG	BIG	BIG	BIG	BIG	-I-	-I-	BI-	BI-	-I-	-I-			12.0807	11.7222	12.1684
1	NPBW1		A	NPBW1			8.63271	8.63271	7.37745	7.37745										A	NPBW1	0	1	0	0		1		4			---	---	-IG	-IG	-IG	-IG	--G	---	---	---	---	---	---
1	NPFF1		A	NPFF1			9.30485	9.29676	9.54961	9.79503	10.2693									A	NPFF1	0	1	0	0		1		5			---	---	BIG	BIG	BIG	BIG	BIG	---	---	---	B--	B--	B--			9.92441	9.90823	10.6155
1	NPFF2		A	NPFF2			9.10832	9.07644	9.43304	9.68894	9.96163									A	NPFF2	0	1	0	0		1		5			---	---	BIG	BIG	BIG	BIG	BIG	---	---	---	---	---	---			8.51193	8.44818	9.24761
1	NTR1		A	NTS1	9.48719	9.31782	10.7298	10.7298	10.2213	10.2213	10.4885	11.6053	11.6053	11.5333	9.13451					A	NTS1	2	2	1	0		3	2	5	4		-IG	-IG	-IG	-IG	-IG	-IG	-IG	-IG	-IG	-IG	-IG	-I-	-I-
1	OXYR		A	OT			9.20602	9.20602				10.0363	10.0039	9.18506	9.27614					A	OT	0	2	1	0		2		2	4		-I-	-I-	-IG	-IG	--G	--G	--G	BIG	BIG	BIG	B-G	---	---
1	OX1R		A	OX1	10.0558	10.0809	11.1468	11.1468	10.5993	10.5993	11.1846	11.1902	11.1902	11.4686	11.3428					A	OX1	1	1	1	0		3	2	5	4		-IG	-IG	-IG	-IG	-IG	-IG	-IG	-IG	-IG	-IG	-IG	-I-	-I-
1	OX2R		A	OX2	8.85441	8.88697	9.05301	8.91248	9.35541	9.53861	10.2159	10.7301	10.6878	10.4338	9.00164	9.21386	8.85119			A	OX2	1	1	1	0		4	2	5	4	2	-IG	-IG	BIG	BIG	BIG	BIG	BIG	BIG	BIG	BIG	BIG	BI-	BI-			8.72842	8.44735	9.50764
1	OXGR1		A	Oxoglutarate								6.2917	6.2917							A	Oxoglutarate	0	0	1	0		1			2		-I-	-I-	-I-	-I-	-I-	-I-	-I-	-IG	-IG	--G	--G	---	---
1	P2RY1		A	P2Y1											8.21052					A	P2Y1	0	2	1	0		2			1		---	---	--G	--G	--G	--G	--G	--G	--G	--G	-IG	---	---
1	P2Y11		A	P2Y11		8.03992						8.23779	8.23779	8.08106	7.51319					A	P2Y11	2	0	1	0		2	1		4		--G	-IG	-I-	-I-	-I-	-I-	-I-	-IG	-IG	-IG	-IG	-I-	-I-
1	P2Y13		A	P2Y13			6.78878	6.78878	7.30054	7.30054										A	P2Y13	0	1	0	0		1		4			---	---	-IG	-IG	-IG	-IG	--G	-I-	-I-	-I-	-I-	---	-I-
1	P2Y14		A	P2Y14							8.03494									A	P2Y14	0	1	0	0		1		1			---	---	--G	--G	--G	--G	-IG	-I-	-I-	-I-	---	---	---
1	P2RY2		A	P2Y2			7.09212	7.11603	7.30549	7.41048	7.46018	6.99281	6.92219	6.74728	7.34384					A	P2Y2	0	2	1	2		3		5	4		---	---	B-G	B-G	B-G	B-G	B-G	B-G	B-G	B-G	B-G	--G	--G			7.09212	7.11603	7.30549
1	P2RY4		A	P2Y4											8.03927					A	P2Y4	0	0	1	0		1			1		-I-	-I-	-I-	-I-	-I-	-I-	-I-	--G	--G	--G	-IG	-I-	-I-
1	PTAFR		A	PAF					11.0133	11.0133	11.0614				10.9456					A	PAF	0	1	1	0		2		3	1		-I-	-I-	--G	--G	-IG	-IG	-IG	--G	--G	--G	-IG	---	-I-
1	PAR1		A	PAR1			7.67198	8.00164	8.21235	8.44972	8.55251	8.8057	8.79424	8.273	8.64053		8.95157			A	PAR1	0	0	0	0		3		5	4	1	---	---	BI-	BI-	BI-	BI-	BI-	BI-	BI-	BI-	BI-	-I-	BI-			5.79248	6.4518	7.17896
1	PAR2		A	PAR2			7.69721	7.78743	7.78486	8.04214	7.94515	7.44375	7.90644	7.60257	7.73561	8.75524	8.2392			A	PAR2	0	0	0	0		3		5	4	2	-I-	-I-	BI-	BI-	BI-	BI-	BI-	BI-	BI-	BI-	BI-	BI-	BI-			7.14361	7.32405	7.61712
1	S1PR1		A	S1P1			9.05176	8.95543	8.71367	8.82852	8.96749					8.58173	7.97531			A	S1P1	0	1	0	0		2		5		2	---	---	BIG	BIG	BIG	BIG	-IG	---	---	---	B--	BI-	BI-			9.30538	9.11274	9.01283
1	S1PR2		A	S1P2	8.40192	8.29059						9.47577	9.47577	9.91366	9.17495	10.2578				A	S1P2	1	0	1	1		3	2		4	1	-IG	-IG	-I-	-I-	-I-	-I-	-I-	-IG	-IG	-IG	-IG	-IG	--G
1	S1PR3		A	S1P3			9.28062	9.28062	9.37471	9.37471	9.32066	9.06692	9.06692	9.18731	9.30678	9.3682	9.20814			A	S1P3	0	1	1	1		3		5	4	2	-I-	-I-	-IG	-IG	-IG	-IG	-IG	-IG	-IG	-IG	-IG	-IG	-IG
1	S1PR5		A	S1P5			8.05097	8.05097									7.02769			A	S1P5	0	1	0	1		2		2		1	---	---	-IG	-IG	--G	--G	--G	---	---	---	---	--G	-IG
1	SSR1		A	SST1			10.9043	10.9043	10.166	10.166	9.59909									A	SST1	0	1	0	0		1		5			---	---	-IG	-IG	-IG	-IG	-IG	---	---	-I-	-I-	-I-	-I-
1	SSR2		A	SST2			11.2619	11.2088	10.9878	11.2501	11.4186			9.95688	9.62224					A	SST2	0	1	0	0		2		5	2		---	---	BIG	BIG	BIG	BIG	BIG	B--	---	BI-	BI-	B--	---			12.1893	12.0832	11.954
1	SSR3		A	SST3			10.169	10.169	9.21133	9.21133	8.92209									A	SST3	0	1	0	0		1		5			---	---	-IG	-IG	-IG	-IG	-IG	---	---	-I-	-I-	-I-	---
1	SSR4		A	SST4			10.8167	10.8167	10.0648	10.0648	9.70531									A	SST4	0	1	0	0		1		5			---	---	-IG	-IG	-IG	-IG	-IG	---	---	-I-	-I-	-I-	---
1	SSR5		A	SST5			11.4123	11.4123	11.1355	11.1355	11.0305									A	SST5	0	1	0	0		1		5			-I-	-I-	-IG	-IG	-IG	-IG	-IG	-I-	-I-	-I-	-I-	-I-	-I-
1	TA2R		A	TP								11.081	11.081	11.0559	8.36248					A	TP	0	0	1	0		1			4		-I-	-I-	-I-	-I-	-I-	-I-	-I-	-IG	-IG	-IG	-IG	-I-	-I-
1	TRFR		A	TRH1								11.889	11.889	12.1039	9.49987					A	TRH1	0	0	1	0		1			4		-I-	-I-	-I-	-I-	-I-	-I-	-I-	-IG	-IG	-IG	-IG	-I-	-I-
1	UR2R		A	UT								11.4878	11.4878	11.5719	10.8967					A	UT	0	0	1	0		1			4		-I-	-I-	-I-	-I-	-I-	-I-	-I-	-IG	-IG	-IG	-IG	-I-	-I-
1	V1AR		A	V1A			9.94193	9.94516	9.63835	9.51921	9.81121	11.5652	11.6229	10.6808	9.79886					A	V1A	0	0	1	0		2		5	4		-I-	-I-	BI-	BI-	BI-	BI-	BI-	BIG	BIG	BIG	BIG	-I-	---			8.83049	8.83693	9.31686
1	V1BR		A	V1B								11.8063	11.8063	10.7137						A	V1B	0	0	1	0		1			3		-I-	-I-	-I-	-I-	-I-	-I-	-I-	-IG	-IG	-IG	--G	-I-	---
1	V2R		A	V2	12.523	12.9214						9.94515	9.98675							A	V2	1	0	0	0		2	2		2		BIG	-IG	B--	B--	---	---	---	BI-	BI-	B--	B--	---	B--	12.0562		8.07116	7.25359
1	NPY1R		A	Y1			10.9708	10.8615	10.6388	11.1726	11.6967									A	Y1	0	1	0	0		1		5			---	---	B-G	B-G	B-G	B-G	B-G	---	---	---	---	---	---			10.9708	10.8615	10.6388
1	NPY5R		A	Y5					9.32308	9.12962	8.78864									A	Y5	0	1	0	0		1		3			---	---	--G	--G	B-G	B-G	B-G	---	---	---	---	---	---					9.32308
1	ADA1A		A	α1A	9.49005		8.45479		8.52951			10.006	9.96272	9.58907	9.20091	8.48863	9.49969			A	α1A	0	0	1	2		4	1	2	4	2	BI-	-I-	BI-	-I-	BI-	-I-	-I-	BIG	BIG	BIG	BIG	-IG	-IG	8.5775		7.89879		8.44638
1	ADA1B		A	α1B								9.38419	9.38419	9.56935	7.74661					A	α1B	0	0	1	0		1			4		-I-	-I-	-I-	-I-	-I-	-I-	-I-	-IG	-IG	-IG	-IG	-I-	-I-
1	ADA1D		A	α1D								8.42566	8.42566	8.51914						A	α1D	0	0	1	0		1			3		-I-	-I-	---	---	---	---	---	-IG	-IG	-IG	--G	---	---
1	ADA2A		A	α2A	7.34778	7.03639	10.2302	10.1989	10.1515	10.3398	10.9833	7.31357	7.21481	7.25048	8.2257	8.13115	7.85626			A	α2A	2	1	0	0		4	2	5	4	2	BIG	-IG	BIG	BIG	BIG	BIG	BIG	BI-	BI-	BI-	BI-	BI-	BI-	7.30271		10.4869	10.4243	10.6649
1	ADA2B		A	α2B	8.31688	7.97588	9.75138	9.64034	9.98846	10.197	10.2425				8.09941					A	α2B	2	1	0	0		3	2	5	1		-IG	-IG	BIG	BIG	BIG	BIG	BIG	-I-	-I-	-I-	BI-	-I-	-I-			9.49875	9.27667	9.99621
1	ADA2C		A	α2C			9.7115	9.71072	9.87258	10.0476	10.6294									A	α2C	2	1	0	0		2		5			--G	--G	BIG	BIG	BIG	BIG	BIG	---	---	-I-	B--	---	B--			10.5116	10.5101	11.2724
1	ADRB1		A	β1	10.7753	9.72204	8.6388	8.6388	8.09205	8.24255	8.51172	7.93737		8.78747			7.72824			A	β1	1	2	0	0		4	2	5	2	1	BIG	-IG	-IG	-IG	BIG	BIG	BIG	BI-	-I-	BI-	B--	B--	BI-	11.6298				7.75273
1	ADRB2		A	β2	9.5662	8.73654														A	β2	1	2	0	0		2	2				BIG	-IG	--G	--G	--G	--G	--G	---	---	-I-	B--	---	---	10.1956
1	ADRB3		A	β3	7.07098	6.80029														A	β3	1	2	0	0		2	2				-IG	-IG	--G	--G	--G	--G	--G	---	---	---	---	---	---
1	OPRD		A	𝛅			10.4763	10.3592	10.1852	10.3503	11.7515			8.68113	8.54461					A	𝛅	0	1	0	0		2		5	2		---	---	BIG	BIG	BIG	BIG	B-G	---	---	BI-	BI-	-I-	B--			10.9539	10.7197	11.2151
1	OPRK		A	𝜅			10.8726	10.7842	10.6677	10.8123	10.8427					8.30938				A	𝜅	0	1	0	2		2		5		1	---	---	BIG	BIG	BIG	BIG	BIG	---	---	-I-	B--	-IG	--G			12.0378	11.861	12.1395
1	OPRM		A	μ			9.56354	9.56037	9.40678	9.55292	9.95618				7.70309					A	μ	0	1	2	0		2		5	1		---	---	BIG	BIG	BIG	BIG	BIG	--G	--G	--G	B-G	---	---			10.1924	10.1861	10.5372
1	CALCR+RAMP3		B1	AMY3	9.30016															B1	AMY3	1	0	0	0		1	1				B-G	--G	---	---	---	---	---	---	---	---	B--	B--	B--	9.30016
1	CRFR1		B1	CRF1	9.406										8.19883					B1	CRF1	1	0	2	0		2	1		1		B-G	--G	B--	B--	---	B--	B--	--G	--G	--G	B-G	B--	B--	9.406		8.23845	8.28999
1	CRFR2		B1	CRF2	12.2933									7.89097	10.6023					B1	CRF2	1	0	2	0		2	1		2		B-G	--G	B--	B--	B--	B--	B--	--G	--G	B-G	B-G	---	---	12.2933		9.87642	9.75864	9.95758
1	CALCR		B1	CT	13.7174							10.0809	9.4055	9.87792	12.386					B1	CT	1	0	2	0		2	1		4		B-G	--G	B--	B--	B--	B--	B--	B-G	B-G	B-G	B-G	B--	B--	13.7174		10.0076	10.1111	10.37
1	GIPR		B1	GIP	11.3169	10.1378														B1	GIP	1	0	0	0		1	2				BIG	-IG	B--	B--	B--	B--	B--	---	---	---	B--	---	---	12.3911		10.1617	10.5195	10.5982
1	GLP1R		B1	GLP-1	12.5851															B1	GLP-1	1	0	0	0		1	1				B-G	--G	B--	B--	B--	B--	B--	---	---	---	B--	---	B--	12.5851		9.04104	8.8624	9.90431
1	GLP2R		B1	GLP-2	12.0864															B1	GLP-2	1	0	0	0		1	1				B-G	--G	B--	B--	B--	B--	B--	---	---	---	B--	---	---	12.0864		9.75583	9.45811	10.8246
1	GLR		B1	Glucagon	12.9514															B1	Glucagon	1	0	0	0		1	1				B-G	--G	B--	B--	B--	B--	B--	B--	B--	B--	B--	---	B--	12.9514		9.94069	9.74938	10.5975
1	PACR		B1	PAC1	10.3211	10.302						10.4139	10.4139	9.91592						B1	PAC1	1	0	1	0		2	2		3		-IG	-IG	-I-	-I-	-I-	-I-	-I-	-IG	-IG	-IG	--G	---	-I-
1	PTH1R		B1	PTH1	11.5945	10.0324						9.64472	9.28744	9.16952	11.0389					B1	PTH1	1	0	2	0		2	2		4		BIG	-IG	B--	B--	B--	B--	B--	BIG	BIG	BIG	B-G	B--	B--	12.9593		9.61234	9.34312	9.76089
1	VIPR1		B1	VPAC1	13.1871		9.55126	9.71293	9.55227	10.2216	9.61049	10.0922	9.36484	8.58442	11.4817					B1	VPAC1	1	2	2	0		3	1	5	4		B-G	--G	B-G	B-G	B-G	B-G	B-G	B-G	B-G	B-G	B-G	B--	B--	13.1871		9.55126	9.71293	9.55227
1	GRM2		C	mGlu2			7.06891	6.72159	7.3621	7.3137	6.68997									C	mGlu2	0	1	0	0		1		5			---	---	B-G	B-G	B-G	B-G	B-G	---	---	---	B--	---	---			7.06891	6.72159	7.3621
1	GRM4		C	mGlu4			5.58417		6.51121	6.29536										C	mGlu4	0	1	0	0		1		3			---	---	B-G	--G	B-G	B-G	--G	---	---	---	---	---	---			5.58417		6.51121
1	GRM5		C	mGlu5			7.28785	7.13284	7.38685	7.17484	7.12401	7.68342	7.68653	6.93648	7.83095					C	mGlu5	2	2	1	0		3		5	4		--G	--G	B-G	B-G	B-G	B-G	B-G	B-G	B-G	B-G	B-G	---	---			7.28785	7.13284	7.38685
1	GRM6		C	mGlu6			6.22897	5.9745	6.72729	6.76685	6.05686									C	mGlu6	0	1	0	0		1		5			---	---	B-G	B-G	B-G	B-G	B-G	---	---	---	---	---	---			6.22897	5.9745	6.72729
1	GRM8		C	mGlu8			7.26072	6.97515	7.34692	7.22691	7.064									C	mGlu8	0	1	0	0		1		5			---	---	B-G	B-G	B-G	B-G	B-G	---	---	---	---	---	---			7.26072	6.97515	7.34692
2	5HT5A		A	5-HT5A																A	5-HT5A	0	1	2	0		2					---	---	--G	--G	--G	--G	--G	--G	--G	--G	--G	---	---
2	AGTR2		A	AT2																A	AT2	0	1	0	0		1					---	---	--G	--G	--G	--G	--G	---	---	---	---	---	---
2	BRS3		A	BB3																A	BB3	0	0	1	0		1					---	---	---	---	---	---	---	--G	--G	--G	--G	---	---
2	CCR1		A	CCR1																A	CCR1	0	1	0	0		1					---	---	--G	--G	--G	--G	--G	---	---	---	---	---	---
2	CCR10		A	CCR10																A	CCR10	0	1	0	0		1					---	---	--G	--G	--G	--G	--G	---	---	---	---	---	---
2	CCR2		A	CCR2																A	CCR2	0	1	0	0		1					---	---	--G	--G	--G	--G	--G	---	---	---	---	---	---
2	CCR3		A	CCR3																A	CCR3	0	1	0	0		1					---	---	--G	--G	--G	--G	--G	---	---	---	---	---	---
2	CCR4		A	CCR4																A	CCR4	0	1	0	0		1					---	---	--G	--G	--G	--G	--G	---	---	---	---	---	---
2	CCR7		A	CCR7																A	CCR7	0	1	0	0		1					---	---	--G	--G	--G	--G	--G	---	---	---	---	---	---
2	CCR8		A	CCR8																A	CCR8	0	1	0	0		1					---	---	--G	--G	--G	--G	--G	---	---	---	---	---	---
2	CCR9		A	CCR9																A	CCR9	0	1	0	0		1					---	---	--G	--G	--G	--G	--G	---	---	---	---	---	---
2	CML1		A	Chemerin																A	Chemerin	0	1	0	0		1					---	---	--G	--G	--G	--G	--G	---	---	---	---	---	---
2	CX3C1		A	CX3CR1																A	CX3CR1	0	1	0	0		1					---	---	--G	--G	--G	--G	--G	---	---	---	---	---	---
2	CXCR1		A	CXCR1																A	CXCR1	0	1	2	0		2					---	---	--G	--G	--G	--G	--G	--G	--G	--G	--G	---	---
2	CXCR3		A	CXCR3																A	CXCR3	0	1	0	0		1					---	---	--G	--G	--G	--G	--G	---	---	---	---	---	---
2	CXCR6		A	CXCR6																A	CXCR6	0	1	0	0		1					---	---	--G	--G	--G	--G	--G	---	---	---	---	---	---
2	PD2R2		A	DP2																A	DP2	0	1	0	0		1					---	---	--G	--G	--G	--G	--G	---	---	---	---	---	---
2	FPR3		A	FPR3																A	FPR3	0	1	0	0		1					---	---	--G	--G	--G	--G	--G	---	---	---	---	---	---
2	FSHR		A	FSH																A	FSH	1	1	1	0		3					--G	--G	--G	--G	--G	--G	--G	--G	--G	--G	--G	---	---
2	GPER1		A	GPER																A	GPER	2	1	0	0		2					--G	--G	--G	--G	--G	--G	--G	---	---	---	---	---	---
2	GP101		A	GPR101																A	GPR101	1	0	0	0		1					--G	--G	---	---	---	---	---	---	---	---	---	---	---
2	GPR12		A	GPR12																A	GPR12	1	1	0	0		2					--G	--G	--G	--G	--G	--G	--G	---	---	---	---	---	---
2	GP139		A	GPR139																A	GPR139	0	0	1	0		1					---	---	---	---	---	---	---	--G	--G	--G	--G	---	---
2	GPR18		A	GPR18																A	GPR18	0	1	1	0		2					---	---	--G	--G	--G	--G	--G	--G	--G	--G	--G	---	---
2	GPR20		A	GPR20																A	GPR20	0	1	0	0		1					---	---	--G	--G	--G	--G	--G	---	---	---	---	---	---
2	GPR22		A	GPR22																A	GPR22	0	1	0	0		1					---	---	--G	--G	--G	--G	--G	---	---	---	---	---	---
2	GPR26		A	GPR26																A	GPR26	1	0	0	0		1					--G	--G	---	---	---	---	---	---	---	---	---	---	---
2	GPR27		A	GPR27																A	GPR27	0	0	1	0		1					---	---	---	---	---	---	---	--G	--G	--G	--G	---	---
2	GPR3		A	GPR3																A	GPR3	1	0	0	0		1					--G	--G	---	---	---	---	---	---	---	---	---	---	---
2	GPR31		A	GPR31																A	GPR31	0	1	0	0		1					---	---	--G	--G	--G	--G	--G	---	---	---	---	---	---
2	GPR33		A	GPR33																A	GPR33	0	1	0	0		1					---	---	--G	--G	--G	--G	--G	---	---	---	---	---	---
2	GPR37		A	GPR37																A	GPR37	0	1	0	0		1					---	---	--G	--G	--G	--G	--G	---	---	---	---	---	---
2	G37L1		A	GPR37L1																A	GPR37L1	0	1	0	0		1					---	---	--G	--G	--G	--G	--G	---	---	---	---	---	---
2	GPR6		A	GPR6																A	GPR6	1	1	0	0		2					--G	--G	--G	--G	--G	--G	--G	---	---	---	---	---	---
2	GPR75		A	GPR75																A	GPR75	0	0	1	0		1					---	---	---	---	---	---	---	--G	--G	--G	--G	---	---
2	GPR78		A	GPR78																A	GPR78	1	0	0	0		1					--G	--G	---	---	---	---	---	---	---	---	---	---	---
2	HCAR1		A	HCA1																A	HCA1	0	1	0	0		1					---	---	--G	--G	--G	--G	--G	---	---	---	---	---	---
2	LSHR		A	LH																A	LH	1	0	2	0		2					--G	--G	---	---	---	---	---	--G	--G	--G	--G	---	---
2	LPAR5		A	LPA5																A	LPA5	0	0	1	1		2					---	---	-I-	-I-	-I-	-I-	-I-	--G	--G	--G	--G	--G	--G
2	MAS		A	MAS1																A	MAS1	0	1	1	0		2					---	---	--G	--G	--G	--G	--G	--G	--G	--G	--G	---	---
2	MSHR		A	MC1																A	MC1	1	0	0	0		1					--G	--G	---	---	---	---	---	---	---	-I-	---	---	---
2	ACTHR		A	MC2																A	MC2	1	0	0	0		1					--G	--G	---	---	---	---	---	---	---	---	---	---	---
2	MRGRD		A	MRGPRD																A	MRGPRD	0	1	1	0		2					---	---	--G	--G	--G	--G	--G	--G	--G	--G	--G	---	---
2	MRGX3		A	MRGPRX3																A	MRGPRX3	0	0	1	0		1					---	---	---	---	---	---	---	--G	--G	--G	--G	---	---
2	MRGX4		A	MRGPRX4																A	MRGPRX4	0	0	1	0		1					---	---	---	---	---	---	---	--G	--G	--G	--G	---	---
2	NPBW2		A	NPBW2																A	NPBW2	0	1	0	0		1					---	---	--G	--G	--G	--G	--G	---	---	---	---	---	---
2	NPSR1		A	NPS																A	NPS	2	0	1	0		2					--G	--G	---	---	---	---	---	--G	--G	--G	--G	---	---
2	NTR2		A	NTS2																A	NTS2	0	0	1	0		1					---	---	---	---	---	---	---	--G	--G	--G	--G	---	---
2	OPN4		A	OPN4																A	OPN4	0	1	1	0		2					---	---	--G	--G	--G	--G	--G	--G	--G	--G	--G	---	---
2	OPN5		A	OPN5																A	OPN5	0	1	0	0		1					---	---	--G	--G	--G	--G	--G	---	---	---	---	---	---
2	OXER1		A	OXE																A	OXE	0	1	0	0		1					---	---	--G	--G	--G	--G	--G	---	---	---	---	---	---
2	P2RY6		A	P2Y6																A	P2Y6	0	0	1	2		2					---	---	---	---	---	---	---	--G	--G	--G	--G	--G	--G
2	PKR1		A	PKR1																A	PKR1	2	0	1	0		2					--G	--G	---	---	---	---	---	--G	--G	--G	--G	---	---
2	PKR2		A	PKR2																A	PKR2	2	2	1	0		3					--G	--G	--G	--G	--G	--G	--G	--G	--G	--G	--G	---	---
2	QRFPR		A	QRFP																A	QRFP	0	1	1	0		2					---	---	--G	--G	--G	--G	--G	--G	--G	--G	--G	---	---
2	RXFP1		A	RXFP1																A	RXFP1	1	1	0	0		2					--G	--G	--G	--G	--G	--G	--G	---	---	---	---	---	---
2	RXFP2		A	RXFP2																A	RXFP2	1	1	0	0		2					--G	--G	--G	--G	--G	--G	--G	---	---	---	---	---	---
2	RL3R1		A	RXFP3																A	RXFP3	0	1	0	0		1					---	---	--G	--G	--G	--G	--G	---	---	---	---	---	---
2	RL3R2		A	RXFP4																A	RXFP4	0	1	0	0		1					---	---	--G	--G	--G	--G	--G	---	---	---	---	---	---
2	S1PR4		A	S1P4																A	S1P4	0	1	0	1		2					---	---	--G	--G	--G	--G	--G	---	---	---	---	--G	--G
2	SUCR1		A	Succinate																A	Succinate	0	1	2	0		2					---	---	--G	--G	--G	--G	--G	--G	--G	--G	--G	---	---
2	TAAR1		A	TA1																A	TA1	1	0	2	0		2					--G	--G	---	---	---	---	---	--G	--G	--G	--G	---	---
2	TSHR		A	TSH																A	TSH	1	0	2	0		2					--G	--G	---	---	---	---	---	--G	--G	--G	--G	---	---
2	XCR1		A	XCR1																A	XCR1	0	1	0	0		1					---	---	--G	--G	--G	--G	--G	---	---	---	---	---	---
2	NPY2R		A	Y2																A	Y2	0	1	2	0		2					---	---	--G	--G	--G	--G	--G	--G	--G	--G	--G	---	---
2	NPY4R		A	Y4																A	Y4	0	1	2	0		2					---	---	--G	--G	--G	--G	--G	--G	--G	--G	--G	---	---
2	GHRHR		B1	GHRH																B1	GHRH	1	0	0	0		1					--G	--G	---	---	---	---	---	---	---	---	---	---	---
2	SCTR		B1	Secretin																B1	Secretin	1	0	0	0		1					--G	--G	---	---	---	---	---	---	---	---	---	---	---
2	VIPR2		B1	VPAC2																B1	VPAC2	1	0	0	0		1					--G	--G	---	---	---	---	---	---	---	---	---	---	---
2	AGRD1		B2	ADGRD1																B2	ADGRD1	1	0	0	0		1					--G	--G	---	---	---	---	---	---	---	---	---	---	---
2	AGRE2		B2	ADGRE2																B2	ADGRE2	0	0	1	0		1					---	---	---	---	---	---	---	--G	--G	--G	--G	---	---
2	AGRE5		B2	ADGRE5																B2	ADGRE5	0	0	0	1		1					---	---	---	---	---	---	---	---	---	---	---	--G	--G
2	AGRG1		B2	ADGRG1																B2	ADGRG1	0	0	1	1		2					---	---	---	---	---	---	---	--G	--G	--G	--G	--G	--G
2	AGRG2		B2	ADGRG2																B2	ADGRG2	0	0	2	0		1					---	---	---	---	---	---	---	--G	--G	--G	--G	---	---
2	AGRG3		B2	ADGRG3																B2	ADGRG3	0	1	0	0		1					---	---	--G	--G	--G	--G	--G	---	---	---	---	---	---
2	AGRL1		B2	ADGRL1																B2	ADGRL1	0	0	1	0		1					---	---	---	---	---	---	---	--G	--G	--G	--G	---	---
2	CASR		C	CaS																C	CaS	0	1	1	1		3					---	---	--G	--G	--G	--G	--G	--G	--G	--G	--G	--G	--G
2	GPC6A		C	GPRC6																C	GPRC6	0	0	1	0		1					---	---	---	---	---	---	---	--G	--G	--G	--G	---	---
2	GRM1		C	mGlu1																C	mGlu1	2	2	1	0		3					--G	--G	--G	--G	--G	--G	--G	--G	--G	--G	--G	---	---
2	GRM3		C	mGlu3																C	mGlu3	0	1	0	0		1					---	---	--G	--G	--G	--G	--G	---	---	---	---	---	---
2	GRM7		C	mGlu7																C	mGlu7	0	1	0	0		1					---	---	--G	--G	--G	--G	--G	---	---	---	---	---	---
2	FZD1		F	FZD1																F	FZD1	0	2	2	0		2					---	---	--G	--G	--G	--G	--G	--G	--G	--G	--G	---	---
2	FZD10		F	FZD10																F	FZD10	0	0	0	2		1					---	---	---	---	---	---	---	---	---	---	---	--G	--G
2	FZD2		F	FZD2																F	FZD2	0	1	0	0		1					---	---	--G	--G	--G	--G	--G	---	---	---	---	---	---
2	FZD3		F	FZD3																F	FZD3	1	0	0	0		1					--G	--G	---	---	---	---	---	---	---	---	---	---	---
2	FZD4		F	FZD4																F	FZD4	0	0	0	1		1					---	---	---	---	---	---	---	---	---	---	---	--G	--G
2	FZD6		F	FZD6																F	FZD6	0	1	1	0		2					---	---	--G	--G	--G	--G	--G	--G	--G	--G	--G	---	---
2	FZD7		F	FZD7																F	FZD7	1	1	0	0		2					--G	--G	--G	--G	--G	--G	--G	---	---	---	---	---	---
2	FZD9		F	FZD9																F	FZD9	0	1	0	0		1					---	---	--G	--G	--G	--G	--G	---	---	---	---	---	---
2	SMO		F	SMO																F	SMO	0	1	0	1		2					---	---	--G	--G	--G	--G	--G	---	---	---	---	--G	--G
3	ACKR1		A	ACKR1																A	ACKR1	0	0	0	0		0					---	---	---	---	---	---	---	---	---	---	---	---	---
3	ACKR2		A	ACKR2																A	ACKR2	0	0	0	0		0					---	---	---	---	---	---	---	---	---	---	---	---	---
3	ACKR3		A	ACKR3																A	ACKR3	0	0	0	0		0					---	---	---	---	---	---	---	---	---	---	---	---	---
3	ACKR4		A	ACKR4																A	ACKR4	0	0	0	0		0					---	---	---	---	---	---	---	---	---	---	---	---	---
3	C3AR		A	C3a																A	C3a	0	0	0	0		0					---	---	---	---	---	---	---	---	---	---	---	---	---
3	C5AR2		A	C5a2																A	C5a2	0	0	0	0		0					---	---	---	---	---	---	---	---	---	---	---	---	---
3	CCRL2		A	CCRL2																A	CCRL2	0	0	0	0		0					---	---	---	---	---	---	---	---	---	---	---	---	---
3	GPR1		A	GPR1																A	GPR1	0	0	0	0		0					---	---	---	---	---	---	---	---	---	---	---	---	---
3	GP132		A	GPR132																A	GPR132	0	0	0	0		0					-I-	-I-	---	---	---	---	---	-I-	-I-	---	---	---	---
3	GP135		A	GPR135																A	GPR135	0	0	0	0		0					---	---	---	---	---	---	---	---	---	---	---	---	---
3	GP141		A	GPR141																A	GPR141	0	0	0	0		0					---	---	---	---	---	---	---	---	---	---	---	---	---
3	GP142		A	GPR142																A	GPR142	0	0	0	0		0					---	---	---	---	---	---	---	---	---	---	---	---	---
3	GP146		A	GPR146																A	GPR146	0	0	0	0		0					---	---	---	---	---	---	---	---	---	---	---	---	---
3	GP148		A	GPR148																A	GPR148	0	0	0	0		0					---	---	---	---	---	---	---	---	---	---	---	---	---
3	GP149		A	GPR149																A	GPR149	0	0	0	0		0					---	---	---	---	---	---	---	---	---	---	---	---	---
3	GPR15		A	GPR15																A	GPR15	0	0	0	0		0					---	---	---	---	---	---	---	---	---	---	---	---	---
3	GP150		A	GPR150																A	GPR150	0	0	0	0		0					---	---	---	---	---	---	---	---	---	---	---	---	---
3	GP151		A	GPR151																A	GPR151	0	0	0	0		0					---	---	---	---	---	---	---	---	---	---	---	---	---
3	GP152		A	GPR152																A	GPR152	0	0	0	0		0					---	---	---	---	---	---	---	---	---	---	---	---	---
3	GP153		A	GPR153																A	GPR153	0	0	0	0		0					---	---	---	---	---	---	---	---	---	---	---	---	---
3	GP160		A	GPR160																A	GPR160	0	0	0	0		0					---	---	---	---	---	---	---	---	---	---	---	---	---
3	GP161		A	GPR161																A	GPR161	0	0	0	0		0					---	---	---	---	---	---	---	---	---	---	---	---	---
3	GP162		A	GPR162																A	GPR162	0	0	0	0		0					---	---	---	---	---	---	---	---	---	---	---	---	---
3	GP171		A	GPR171																A	GPR171	0	0	0	0		0					---	---	---	---	---	---	---	---	---	---	---	---	---
3	GP173		A	GPR173																A	GPR173	0	0	0	0		0					---	---	---	---	---	---	---	---	---	---	---	---	---
3	GP174		A	GPR174																A	GPR174	0	0	0	0		0					-I-	-I-	---	---	---	---	---	---	---	---	---	---	-I-
3	GP176		A	GPR176																A	GPR176	0	0	0	0		0					---	---	---	---	---	---	---	---	---	---	---	---	---
3	GP182		A	GPR182																A	GPR182	0	0	0	0		0					---	---	---	---	---	---	---	---	---	---	---	---	---
3	GPR19		A	GPR19																A	GPR19	0	0	0	0		0					---	---	---	---	---	---	---	---	---	---	---	---	---
3	GPR21		A	GPR21																A	GPR21	0	0	0	0		0					---	---	---	---	---	---	---	---	---	---	---	---	---
3	GPR25		A	GPR25																A	GPR25	0	0	0	0		0					---	---	---	---	---	---	---	---	---	---	---	---	---
3	GPR32		A	GPR32																A	GPR32	0	0	0	0		0					---	---	---	---	---	---	---	---	---	---	---	---	---
3	GPR35		A	GPR35																A	GPR35	0	0	0	0		0					---	---	-I-	-I-	-I-	-I-	-I-	---	---	---	---	-I-	-I-
3	GPR42		A	GPR42																A	GPR42	0	0	0	0		0					---	---	---	---	---	---	---	---	---	---	---	---	---
3	GPR45		A	GPR45																A	GPR45	0	0	0	0		0					---	---	---	---	---	---	---	---	---	---	---	---	---
3	MTR1L		A	GPR50																A	GPR50	0	0	0	0		0					---	---	---	---	---	---	---	---	---	---	---	---	---
3	GPR52		A	GPR52																A	GPR52	0	0	0	0		0					---	---	---	---	---	---	---	---	---	---	---	---	---
3	GPR61		A	GPR61																A	GPR61	0	0	0	0		0					---	---	---	---	---	---	---	---	---	---	---	---	---
3	GPR62		A	GPR62																A	GPR62	0	0	0	0		0					---	---	---	---	---	---	---	---	---	---	---	---	---
3	GPR63		A	GPR63																A	GPR63	0	0	0	0		0					---	---	---	---	---	---	---	---	---	---	---	---	---
3	GPR82		A	GPR82																A	GPR82	0	0	0	0		0					---	---	---	---	---	---	---	---	---	---	---	---	---
3	GPR83		A	GPR83																A	GPR83	0	0	0	0		0					---	---	---	---	---	---	---	---	---	---	---	---	---
3	GPR85		A	GPR85																A	GPR85	0	0	0	0		0					---	---	---	---	---	---	---	---	---	---	---	---	---
3	GPR87		A	GPR87																A	GPR87	0	0	0	0		0					---	---	---	---	---	---	---	---	---	---	---	---	---
3	GPR88		A	GPR88																A	GPR88	0	0	0	0		0					---	---	---	---	---	---	---	---	---	---	---	---	---
3	LGR4		A	LGR4																A	LGR4	0	0	0	0		0					---	---	---	---	---	---	---	---	---	---	---	---	---
3	LGR5		A	LGR5																A	LGR5	0	0	0	0		0					---	---	---	---	---	---	---	---	---	---	---	---	---
3	LGR6		A	LGR6																A	LGR6	0	0	0	0		0					---	---	---	---	---	---	---	---	---	---	---	---	---
3	MAS1L		A	MAS1L																A	MAS1L	0	0	0	0		0					---	---	---	---	---	---	---	---	---	---	---	---	---
3	MRGRE		A	MRGPRE																A	MRGPRE	0	0	0	0		0					---	---	---	---	---	---	---	---	---	---	---	---	---
3	MRGRF		A	MRGPRF																A	MRGPRF	0	0	0	0		0					---	---	---	---	---	---	---	---	---	---	---	---	---
3	MRGRG		A	MRGPRG																A	MRGPRG	0	0	0	0		0					---	---	---	---	---	---	---	---	---	---	---	---	---
3	OPSR		A	OPN1LW																A	OPN1LW	0	0	0	0		0					---	---	---	---	---	---	---	---	---	---	---	---	---
3	OPSG		A	OPN1MW																A	OPN1MW	0	0	0	0		0					---	---	---	---	---	---	---	---	---	---	---	---	---
3	OPSB		A	OPN1SW																A	OPN1SW	0	0	0	0		0					---	---	---	---	---	---	---	---	---	---	---	---	---
3	OPN3		A	OPN3																A	OPN3	0	0	0	0		0					---	---	---	---	---	---	---	---	---	---	---	---	---
3	P2Y10		A	P2RY10																A	P2RY10	0	0	0	0		0					---	---	-I-	-I-	-I-	-I-	-I-	---	---	-I-	---	-I-	-I-
3	P2RY8		A	P2RY8																A	P2RY8	0	0	0	0		0					---	---	---	---	---	---	---	---	---	---	---	---	---
3	P2Y12		A	P2Y12																A	P2Y12	0	0	0	0		0					---	---	---	---	-I-	-I-	-I-	-I-	-I-	-I-	---	-I-	-I-
3	PAR3		A	PAR3																A	PAR3	0	0	0	0		0					-I-	-I-	-I-	-I-	-I-	-I-	-I-	-I-	-I-	-I-	-I-	-I-	-I-
3	PAR4		A	PAR4																A	PAR4	0	0	0	0		0					-I-	-I-	-I-	-I-	-I-	-I-	-I-	-I-	-I-	-I-	-I-	-I-	-I-
3	PRLHR		A	PrRP																A	PrRP	0	0	0	0		0					---	---	-I-	-I-	-I-	-I-	---	-I-	-I-	-I-	---	---	-I-
3	OPSD		A	Rhodopsin																A	Rhodopsin	0	0	0	0		0					---	---	---	---	---	---	---	---	---	---	---	---	---
3	TAAR2		A	TAAR2																A	TAAR2	0	0	0	0		0					---	---	---	---	---	---	---	---	---	---	---	---	---
3	TAAR3		A	TAAR3																A	TAAR3	0	0	0	0		0					---	---	---	---	---	---	---	---	---	---	---	---	---
3	TAAR5		A	TAAR5																A	TAAR5	0	0	0	0		0					---	---	---	---	---	---	---	---	---	---	---	---	---
3	TAAR6		A	TAAR6																A	TAAR6	0	0	0	0		0					---	---	---	---	---	---	---	---	---	---	---	---	---
3	TAAR8		A	TAAR8																A	TAAR8	0	0	0	0		0					---	---	---	---	---	---	---	---	---	---	---	---	---
3	TAAR9		A	TAAR9																A	TAAR9	0	0	0	0		0					---	---	---	---	---	---	---	---	---	---	---	---	---
3	NPY6R		A	Y6																A	Y6	0	0	0	0		0					---	---	---	---	---	---	---	---	---	---	---	---	---
3	CALRL		B1	Calcitonin receptor-like																B1	Calcitonin receptor-like	0	0	0	0		0					---	---	---	---	---	---	---	---	---	---	---	---	---
3	PTH2R		B1	PTH2																B1	PTH2	0	0	0	0		0					-I-	-I-	-I-	-I-	-I-	-I-	-I-	-I-	-I-	-I-	-I-	---	-I-
3	AGRA1		B2	ADGRA1																B2	ADGRA1	0	0	0	0		0					---	---	---	---	---	---	---	---	---	---	---	---	---
3	AGRA2		B2	ADGRA2																B2	ADGRA2	0	0	0	0		0					---	---	---	---	---	---	---	---	---	---	---	---	---
3	AGRA3		B2	ADGRA3																B2	ADGRA3	0	0	0	0		0					---	---	---	---	---	---	---	---	---	---	---	---	---
3	AGRB1		B2	ADGRB1																B2	ADGRB1	0	0	0	0		0					---	---	---	---	---	---	---	---	---	---	---	---	---
3	AGRB2		B2	ADGRB2																B2	ADGRB2	0	0	0	0		0					---	---	---	---	---	---	---	---	---	---	---	---	---
3	AGRB3		B2	ADGRB3																B2	ADGRB3	0	0	0	0		0					---	---	---	---	---	---	---	---	---	---	---	---	---
3	AGRD2		B2	ADGRD2																B2	ADGRD2	0	0	0	0		0					---	---	---	---	---	---	---	---	---	---	---	---	---
3	AGRE1		B2	ADGRE1																B2	ADGRE1	0	0	0	0		0					---	---	---	---	---	---	---	---	---	---	---	---	---
3	AGRE3		B2	ADGRE3																B2	ADGRE3	0	0	0	0		0					---	---	---	---	---	---	---	---	---	---	---	---	---
3	AGRE4		B2	ADGRE4P																B2	ADGRE4P	0	0	0	0		0					---	---	---	---	---	---	---	---	---	---	---	---	---
3	AGRF1		B2	ADGRF1																B2	ADGRF1	0	0	0	0		0					---	---	---	---	---	---	---	---	---	---	---	---	---
3	AGRF2		B2	ADGRF2																B2	ADGRF2	0	0	0	0		0					---	---	---	---	---	---	---	---	---	---	---	---	---
3	AGRF3		B2	ADGRF3																B2	ADGRF3	0	0	0	0		0					---	---	---	---	---	---	---	---	---	---	---	---	---
3	AGRF4		B2	ADGRF4																B2	ADGRF4	0	0	0	0		0					---	---	---	---	---	---	---	---	---	---	---	---	---
3	AGRF5		B2	ADGRF5																B2	ADGRF5	0	0	0	0		0					---	---	---	---	---	---	---	---	---	---	---	---	---
3	AGRG4		B2	ADGRG4																B2	ADGRG4	0	0	0	0		0					---	---	---	---	---	---	---	---	---	---	---	---	---
3	AGRG5		B2	ADGRG5																B2	ADGRG5	0	0	0	0		0					---	---	---	---	---	---	---	---	---	---	---	---	---
3	AGRG6		B2	ADGRG6																B2	ADGRG6	0	0	0	0		0					---	---	---	---	---	---	---	---	---	---	---	---	---
3	AGRG7		B2	ADGRG7																B2	ADGRG7	0	0	0	0		0					---	---	---	---	---	---	---	---	---	---	---	---	---
3	AGRL2		B2	ADGRL2																B2	ADGRL2	0	0	0	0		0					---	---	---	---	---	---	---	---	---	---	---	---	---
3	AGRL3		B2	ADGRL3																B2	ADGRL3	0	0	0	0		0					---	---	---	---	---	---	---	---	---	---	---	---	---
3	AGRL4		B2	ADGRL4																B2	ADGRL4	0	0	0	0		0					---	---	---	---	---	---	---	---	---	---	---	---	---
3	AGRV1		B2	ADGRV1																B2	ADGRV1	0	0	0	0		0					---	---	---	---	---	---	---	---	---	---	---	---	---
3	CELR1		B2	CELSR1																B2	CELSR1	0	0	0	0		0					---	---	---	---	---	---	---	---	---	---	---	---	---
3	CELR2		B2	CELSR2																B2	CELSR2	0	0	0	0		0					---	---	---	---	---	---	---	---	---	---	---	---	---
3	CELR3		B2	CELSR3																B2	CELSR3	0	0	0	0		0					---	---	---	---	---	---	---	---	---	---	---	---	---
3	GABR1		C	GABAB1																C	GABAB1	0	0	0	0		0					---	---	---	---	---	---	---	---	---	---	---	---	---
3	GABR2		C	GABAB2																C	GABAB2	0	0	0	0		0					---	---	---	---	---	---	---	---	---	---	---	---	---
3	GP156		C	GPR156																C	GPR156	0	0	0	0		0					---	---	---	---	---	---	---	---	---	---	---	---	---
3	GP158		C	GPR158																C	GPR158	0	0	0	0		0					---	---	---	---	---	---	---	---	---	---	---	---	---
3	GP179		C	GPR179																C	GPR179	0	0	0	0		0					---	---	---	---	---	---	---	---	---	---	---	---	---
3	RAI3		C	GPRC5A																C	GPRC5A	0	0	0	0		0					---	---	---	---	---	---	---	---	---	---	---	---	---
3	GPC5B		C	GPRC5B																C	GPRC5B	0	0	0	0		0					---	---	---	---	---	---	---	---	---	---	---	---	---
3	GPC5C		C	GPRC5C																C	GPRC5C	0	0	0	0		0					---	---	---	---	---	---	---	---	---	---	---	---	---
3	GPC5D		C	GPRC5D																C	GPRC5D	0	0	0	0		0					---	---	---	---	---	---	---	---	---	---	---	---	---
3	TS1R1		C	TAS1R1																C	TAS1R1	0	0	0	0		0					---	---	---	---	---	---	---	---	---	---	---	---	---
3	TS1R2		C	TAS1R2																C	TAS1R2	0	0	0	0		0					---	---	---	---	---	---	---	---	---	---	---	---	---
3	TS1R3		C	TAS1R3																C	TAS1R3	0	0	0	0		0					---	---	---	---	---	---	---	---	---	---	---	---	---
3	FZD5		F	FZD5																F	FZD5	0	0	0	0		0					---	---	---	---	---	---	---	---	---	---	---	---	---
3	FZD8		F	FZD8																F	FZD8	0	0	0	0		0					---	---	---	---	---	---	---	---	---	---	---	---	---
3	O51E1		O	0																O	0	0	0	0	0		0					---	---	---	---	---	---	---	---	---	---	---	---	---
3	GP107		O	GPR107																O	GPR107	0	0	0	0		0					---	---	---	---	---	---	---	---	---	---	---	---	---
3	G137A		O	GPR137																O	GPR137	0	0	0	0		0					---	---	---	---	---	---	---	---	---	---	---	---	---
3	GP143		O	GPR143																O	GPR143	0	0	0	0		0					---	---	---	---	---	---	---	---	---	---	---	---	---
3	GP157		O	GPR157																O	GPR157	0	0	0	0		0					---	---	---	---	---	---	---	---	---	---	---	---	---
3	TPRA1		O	TPRA1																O	TPRA1	0	0	0	0		0					---	---	---	---	---	---	---	---	---	---	---	---	---
3	TA2R1		T	TAS2R1																T	TAS2R1	0	0	0	0		0					---	---	---	---	---	---	---	---	---	---	---	---	---
3	T2R10		T	TAS2R10																T	TAS2R10	0	0	0	0		0					---	---	---	---	---	---	---	---	---	---	---	---	---
3	T2R13		T	TAS2R13																T	TAS2R13	0	0	0	0		0					---	---	---	---	---	---	---	---	---	---	---	---	---
3	T2R14		T	TAS2R14																T	TAS2R14	0	0	0	0		0					---	---	---	---	---	---	---	---	---	---	---	---	---
3	T2R16		T	TAS2R16																T	TAS2R16	0	0	0	0		0					---	---	---	---	---	---	---	---	---	---	---	---	---
3	T2R19		T	TAS2R19																T	TAS2R19	0	0	0	0		0					---	---	---	---	---	---	---	---	---	---	---	---	---
3	T2R20		T	TAS2R20																T	TAS2R20	0	0	0	0		0					---	---	---	---	---	---	---	---	---	---	---	---	---
3	TA2R3		T	TAS2R3																T	TAS2R3	0	0	0	0		0					---	---	---	---	---	---	---	---	---	---	---	---	---
3	T2R30		T	TAS2R30																T	TAS2R30	0	0	0	0		0					---	---	---	---	---	---	---	---	---	---	---	---	---
3	T2R31		T	TAS2R31																T	TAS2R31	0	0	0	0		0					---	---	---	---	---	---	---	---	---	---	---	---	---
3	T2R38		T	TAS2R38																T	TAS2R38	0	0	0	0		0					---	---	---	---	---	---	---	---	---	---	---	---	---
3	T2R39		T	TAS2R39																T	TAS2R39	0	0	0	0		0					---	---	---	---	---	---	---	---	---	---	---	---	---
3	TA2R4		T	TAS2R4																T	TAS2R4	0	0	0	0		0					---	---	---	---	---	---	---	---	---	---	---	---	---
3	T2R40		T	TAS2R40																T	TAS2R40	0	0	0	0		0					---	---	---	---	---	---	---	---	---	---	---	---	---
3	T2R41		T	TAS2R41																T	TAS2R41	0	0	0	0		0					---	---	---	---	---	---	---	---	---	---	---	---	---
3	T2R42		T	TAS2R42																T	TAS2R42	0	0	0	0		0					---	---	---	---	---	---	---	---	---	---	---	---	---
3	T2R43		T	TAS2R43																T	TAS2R43	0	0	0	0		0					---	---	---	---	---	---	---	---	---	---	---	---	---
3	T2R45		T	TAS2R45																T	TAS2R45	0	0	0	0		0					---	---	---	---	---	---	---	---	---	---	---	---	---
3	T2R46		T	TAS2R46																T	TAS2R46	0	0	0	0		0					---	---	---	---	---	---	---	---	---	---	---	---	---
3	TA2R5		T	TAS2R5																T	TAS2R5	0	0	0	0		0					---	---	---	---	---	---	---	---	---	---	---	---	---
3	T2R50		T	TAS2R50																T	TAS2R50	0	0	0	0		0					---	---	---	---	---	---	---	---	---	---	---	---	---
3	T2R60		T	TAS2R60																T	TAS2R60	0	0	0	0		0					---	---	---	---	---	---	---	---	---	---	---	---	---
3	TA2R7		T	TAS2R7																T	TAS2R7	0	0	0	0		0					---	---	---	---	---	---	---	---	---	---	---	---	---
3	TA2R8		T	TAS2R8																T	TAS2R8	0	0	0	0		0					---	---	---	---	---	---	---	---	---	---	---	---	---
3	TA2R9		T	TAS2R9																T	TAS2R9	0	0	0	0		0					---	---	---	---	---	---	---	---	---	---	---	---	---
[truncated: 21 more columns]

## Sheet: Fig_4
	Gs	Golf	Gi1	Gi2	GoA	GoB	Gz	Gq	G11	G14	G15	G12	G13	Avg		Gs	Gi/o	Gq /11	G12 /13	Avg		1	2	3	4	<=No. Families (GPCR count)		Count	1	2	3	4	5
#GPCRs	55	45	104	102	103	105	98	81	79	84	87	30	33	77.3846		87	176	134	49	111.5		126	83	34	13	Avg: 1.7		Gs	11	43					Note: Gs couplings are entered manually. Golf couplings are only counted if there is a supported Gs coupling.
																												Gi/o	4	7	8	10	86
%	21.4844	17.5781	40.625	39.8438	40.2344	41.0156	38.2812	31.6406	30.8594	32.8125	33.9844	11.7188	12.8906	30.2284		33.9844	68.75	52.3438	19.1406			49.2188	32.4219	13.2812	5.07812	%		Gq/11	11	9	6	71
																												G12/13	13	25
															#Fam
															1	23	71	29	3									%	1	2	3	4	5
															2	33	60	59	14									Gs	20.3704	79.6296	0	0	0
															3	18	32	33	19									Gi/o	3.47826	6.08696	6.95652	8.69565	74.7826
															4	13	13	13	13									Gq/11	11.3402	9.27835	6.18557	73.1959	0
																												G12/13	34.2105	65.7895	0	0	0
															%
															1	26.4368	40.3409	21.6418	6.12245									Avg all:	73.3494
															2	37.931	34.0909	44.0299	28.5714
															3	20.6897	18.1818	24.6269	38.7755
															4	14.9425	7.38636	9.70149	26.5306
Class A
#GPCRs	44	42	98	97	97	99	93	76	74	78	81	30	33			68	159	118	43

[truncated: 5 more sheets: Fig_5, Bouvier, Inoue, Jaccard, Fig_Determinants]
